# Supplementary material
Source: publisher figshare collection journal article supplement (https://geolsoc.figshare.com/articles/dataset/_/3454061)
Supplement: Supplementary file 1 [file 1]

| Spot  | U<br>(ppm) | Th<br>(ppm) | $^{232}\text{Th}/^{238}\text{U}$ | $^{206}\text{Pb}^*$ | $^{206}\text{Pb}_c\%$ | $^{238}\text{U}/^{206}\text{Pb}$ | $\pm\%$ | $^{207}\text{Pb}^*/^{206}\text{Pb}^*$ | $\pm\%$ | Total $^{207}\text{Pb}/^{206}\text{Pb}$ | $\pm\%$ | $^{206}\text{Pb}/^{238}\text{U}$ | $\pm 1\sigma$ |
|-------|------------|-------------|----------------------------------|---------------------|-----------------------|----------------------------------|---------|---------------------------------------|---------|-----------------------------------------|---------|----------------------------------|---------------|
| XH-13 |            |             |                                  |                     |                       |                                  |         |                                       |         |                                         |         |                                  |               |
| 1.1   | 72         | 41          | 0.59                             | 2.78                | 1.75                  | 22.69                            | 2.2     | 0.0406                                | 11      | 0.0548                                  | 5.3     | 278.1                            | 6             |
| 2.1   | 79         | 46          | 0.6                              | 3.09                | 2.95                  | 22.73                            | 2.5     | 0.03                                  | 36      | 0.0545                                  | 4.5     | 277.6                            | 6.7           |
| 3.1   | 126        | 66          | 0.54                             | 4.69                | 1.04                  | 23.37                            | 2.4     | 0.0454                                | 9.6     | 0.0539                                  | 3.6     | 270.1                            | 6.3           |
| 4.1   | 85         | 50          | 0.61                             | 3.23                | 4.11                  | 23.69                            | 2.5     | 0.022                                 | 47      | 0.0559                                  | 4.3     | 266.5                            | 6.5           |
| 5.1   | 77         | 49          | 0.65                             | 2.93                | 1.68                  | 22.98                            | 2.3     | 0.0463                                | 15      | 0.0599                                  | 4.4     | 274.6                            | 6.1           |
| 6.1   | 87         | 69          | 0.81                             | 3.34                | 1.72                  | 22.8                             | 2.1     | 0.0459                                | 9.3     | 0.0598                                  | 4.1     | 276.7                            | 5.7           |
| 7.1   | 79         | 71          | 0.92                             | 2.95                | 4.72                  | 24.11                            | 2.6     | 0.016                                 | 70      | 0.055                                   | 4.4     | 262                              | 6.6           |
| 8.1   | 94         | 56          | 0.61                             | 3.59                | 2.5                   | 23.08                            | 2.5     | 0.0324                                | 20      | 0.0529                                  | 4.1     | 273.4                            | 6.7           |
| 9.1   | 89         | 56          | 0.64                             | 3.36                | 6.27                  | 24.43                            | 3.3     |                                       |         | 0.0567                                  | 4.2     | 258.7                            | 8.3           |
| 10.1  | 80         | 78          | 1                                | 2.94                | 2.56                  | 24.09                            | 2.4     | 0.0369                                | 22      | 0.0578                                  | 4.5     | 262.2                            | 6.3           |
| 11.1  | 167        | 157         | 0.97                             | 6.43                | 2.07                  | 22.8                             | 2       | 0.0392                                | 19      | 0.0561                                  | 3.1     | 276.7                            | 5.5           |
| 12.1  | 73         | 64          | 0.91                             | 2.66                | 5.48                  | 24.92                            | 3       |                                       |         | 0.0587                                  | 4.6     | 253.7                            | 7.4           |
| 13.1  | 76         | 47          | 0.64                             | 2.75                | 4.69                  | 24.86                            | 2.9     | 0.025                                 | 66      | 0.0641                                  | 4.4     | 254.3                            | 7.3           |
| 14.1  | 234        | 124         | 0.55                             | 9.8                 | 1.65                  | 20.87                            | 1.8     | 0.0462                                | 10      | 0.0595                                  | 2.8     | 301.7                            | 5.4           |
| 15.1  | 63         | 41          | 0.67                             | 2.18                | 2.57                  | 25.5                             | 6.3     | 0.038                                 | 33      | 0.059                                   | 5.1     | 248                              | 15            |

Yang *et al.* (2006)

| Spot             | Pb<br>ppm | Th<br>ppm | U<br>ppm | Th/U | Isotope ratio                        |        |                                     |        |                                     |        | Age (Ma)                             |     |                                     |    | RHO |                                     |      |
|------------------|-----------|-----------|----------|------|--------------------------------------|--------|-------------------------------------|--------|-------------------------------------|--------|--------------------------------------|-----|-------------------------------------|----|-----|-------------------------------------|------|
|                  |           |           |          |      | <sup>207</sup> Pb/ <sup>206</sup> Pb | 1σ     | <sup>207</sup> Pb/ <sup>235</sup> U | 1σ     | <sup>206</sup> Pb/ <sup>238</sup> U | 1σ     | <sup>207</sup> Pb/ <sup>206</sup> Pb | 1σ  | <sup>207</sup> Pb/ <sup>235</sup> U | 1σ |     | <sup>206</sup> Pb/ <sup>238</sup> U | 1σ   |
| Basalt 04-B03    |           |           |          |      |                                      |        |                                     |        |                                     |        |                                      |     |                                     |    |     |                                     |      |
| 1                | 8         | 57        | 129      | 0.44 | 0.0465                               | 0.0023 | 0.3016                              | 0.0147 | 0.0471                              | 0.0007 | 22                                   | 116 | 268                                 | 11 | 296 | 4                                   | 0.10 |
| 2                | 7         | 68        | 117      | 0.58 | 0.0522                               | 0.0024 | 0.3279                              | 0.0146 | 0.0455                              | 0.0007 | 296                                  | 101 | 288                                 | 11 | 287 | 4                                   | 0.06 |
| 3                | 42        | 869       | 606      | 1.44 | 0.0781                               | 0.0022 | 0.4746                              | 0.0131 | 0.0441                              | 0.0006 | 1150                                 | 56  | 394                                 | 9  | 278 | 3                                   | 0.18 |
| 4                | 7         | 49        | 87       | 0.56 | 0.0667                               | 0.0057 | 0.3835                              | 0.0319 | 0.0417                              | 0.001  | 830                                  | 170 | 330                                 | 23 | 263 | 6                                   | 0.05 |
| 5                | 9         | 80        | 159      | 0.5  | 0.0508                               | 0.0024 | 0.3086                              | 0.0145 | 0.0441                              | 0.0006 | 230                                  | 108 | 273                                 | 11 | 278 | 4                                   | 0.14 |
| 6                | 15        | 122       | 189      | 0.64 | 0.073                                | 0.0042 | 0.4311                              | 0.024  | 0.0428                              | 0.0008 | 1015                                 | 113 | 364                                 | 17 | 270 | 5                                   | 0.06 |
| 7                | 5         | 51        | 86       | 0.59 | 0.0479                               | 0.0048 | 0.265                               | 0.0261 | 0.0401                              | 0.001  | 95                                   | 223 | 239                                 | 21 | 253 | 6                                   | 0.05 |
| 8                | 12        | 108       | 179      | 0.6  | 0.0724                               | 0.0057 | 0.3825                              | 0.0289 | 0.0383                              | 0.0009 | 997                                  | 152 | 329                                 | 21 | 242 | 6                                   | 0.01 |
| Tuff (04-B04)    |           |           |          |      |                                      |        |                                     |        |                                     |        |                                      |     |                                     |    |     |                                     |      |
| 1                | 16        | 115       | 202      | 0.57 | 0.0531                               | 0.0032 | 0.3105                              | 0.0179 | 0.0424                              | 0.0008 | 333                                  | 129 | 275                                 | 14 | 268 | 5                                   | 0.01 |
| 2                | 22        | 167       | 315      | 0.53 | 0.0469                               | 0.0017 | 0.3105                              | 0.0108 | 0.0481                              | 0.0006 | 43                                   | 83  | 275                                 | 8  | 303 | 4                                   | 0.06 |
| 3                | 9         | 72        | 131      | 0.55 | 0.0506                               | 0.0026 | 0.3469                              | 0.0175 | 0.0499                              | 0.0008 | 223                                  | 116 | 302                                 | 13 | 314 | 5                                   | 0.09 |
| 4                | 84        | 1290      | 1132     | 1.14 | 0.0533                               | 0.0011 | 0.3286                              | 0.0063 | 0.0449                              | 0.0005 | 341                                  | 44  | 289                                 | 5  | 283 | 3                                   | 0.13 |
| 5                | 13        | 91        | 186      | 0.49 | 0.0548                               | 0.0021 | 0.3756                              | 0.0141 | 0.05                                | 0.0007 | 404                                  | 84  | 324                                 | 10 | 314 | 4                                   | 0.12 |
| 6                | 13        | 149       | 218      | 0.69 | 0.0488                               | 0.002  | 0.2982                              | 0.0121 | 0.0446                              | 0.0006 | 137                                  | 95  | 265                                 | 9  | 281 | 4                                   | 0.13 |
| 7                | 7         | 46        | 109      | 0.42 | 0.0536                               | 0.0046 | 0.3533                              | 0.0298 | 0.048                               | 0.0011 | 355                                  | 184 | 307                                 | 22 | 303 | 7                                   | 0.06 |
| 8                | 8         | 67        | 136      | 0.49 | 0.0515                               | 0.0026 | 0.3245                              | 0.016  | 0.046                               | 0.0007 | 261                                  | 112 | 285                                 | 12 | 290 | 4                                   | 0.07 |
| 9                | 16        | 137       | 279      | 0.49 | 0.0531                               | 0.0017 | 0.3314                              | 0.0101 | 0.0454                              | 0.0005 | 334                                  | 69  | 291                                 | 8  | 287 | 3                                   | 0.06 |
| 10               | 3         | 44        | 56       | 0.78 | 0.0559                               | 0.0043 | 0.349                               | 0.0261 | 0.0455                              | 0.0009 | 448                                  | 162 | 304                                 | 20 | 287 | 6                                   | 0.02 |
| Gabbro (04-B07)  |           |           |          |      |                                      |        |                                     |        |                                     |        |                                      |     |                                     |    |     |                                     |      |
| 1                | 52        | 844       | 718      | 1.18 | 0.051                                | 0.0016 | 0.3302                              | 0.01   | 0.047                               | 0.0006 | 240                                  | 70  | 290                                 | 8  | 296 | 3                                   | 0.10 |
| 2                | 61        | 1112      | 866      | 1.28 | 0.0525                               | 0.0018 | 0.3235                              | 0.0109 | 0.0447                              | 0.0006 | 305                                  | 77  | 285                                 | 8  | 282 | 3                                   | 0.13 |
| 3                | 73        | 1446      | 1025     | 1.41 | 0.0514                               | 0.0013 | 0.312                               | 0.0075 | 0.044                               | 0.0005 | 259                                  | 56  | 276                                 | 6  | 278 | 3                                   | 0.11 |
| 4                | 95        | 1629      | 1394     | 1.17 | 0.0544                               | 0.0013 | 0.3215                              | 0.0077 | 0.0429                              | 0.0005 | 387                                  | 54  | 283                                 | 6  | 271 | 3                                   | 0.23 |
| 5                | 52        | 1024      | 955      | 1.07 | 0.0617                               | 0.0022 | 0.3414                              | 0.0117 | 0.0401                              | 0.0005 | 663                                  | 74  | 298                                 | 9  | 254 | 3                                   | 0.07 |
| 6                | 29        | 392       | 482      | 0.81 | 0.053                                | 0.0024 | 0.3123                              | 0.0138 | 0.0428                              | 0.0006 | 327                                  | 100 | 276                                 | 11 | 270 | 4                                   | 0.08 |
| Diabase (04-B15) |           |           |          |      |                                      |        |                                     |        |                                     |        |                                      |     |                                     |    |     |                                     |      |
| 1                | 10        | 139       | 181      | 0.77 | 0.0549                               | 0.0033 | 0.3136                              | 0.0185 | 0.0416                              | 0.0007 | 407                                  | 129 | 277                                 | 14 | 263 | 4                                   | 0.08 |

|    |    |     |     |      |        |        |        |        |        |        |     |     |     |    |     |   |      |
|----|----|-----|-----|------|--------|--------|--------|--------|--------|--------|-----|-----|-----|----|-----|---|------|
| 2  | 7  | 60  | 122 | 0.49 | 0.0493 | 0.003  | 0.2957 | 0.0176 | 0.0436 | 0.0007 | 164 | 136 | 263 | 14 | 275 | 4 | 0.05 |
| 3  | 8  | 108 | 164 | 0.66 | 0.0587 | 0.0049 | 0.315  | 0.0254 | 0.0391 | 0.0009 | 554 | 172 | 278 | 20 | 247 | 5 | 0.01 |
| 4  | 10 | 72  | 194 | 0.37 | 0.0508 | 0.0037 | 0.2845 | 0.0201 | 0.0408 | 0.0008 | 231 | 159 | 254 | 16 | 258 | 5 | 0.02 |
| 5  | 11 | 149 | 196 | 0.76 | 0.0551 | 0.0034 | 0.3016 | 0.0179 | 0.0398 | 0.0007 | 417 | 131 | 268 | 14 | 252 | 4 | 0.00 |
| 6  | 13 | 120 | 259 | 0.46 | 0.056  | 0.0031 | 0.3083 | 0.0168 | 0.04   | 0.0007 | 452 | 120 | 273 | 13 | 253 | 4 | 0.10 |
| 7  | 7  | 104 | 125 | 0.84 | 0.0536 | 0.005  | 0.2941 | 0.0267 | 0.0399 | 0.0009 | 356 | 198 | 262 | 21 | 252 | 6 | 0.02 |
| 8  | 46 | 977 | 650 | 1.5  | 0.0547 | 0.0014 | 0.3287 | 0.0082 | 0.0437 | 0.0005 | 399 | 56  | 289 | 6  | 276 | 3 | 0.16 |
| 9  | 12 | 132 | 218 | 0.61 | 0.0534 | 0.0023 | 0.3079 | 0.013  | 0.0419 | 0.0006 | 347 | 95  | 273 | 10 | 265 | 4 | 0.10 |
| 10 | 5  | 50  | 86  | 0.58 | 0.046  | 0.0035 | 0.2639 | 0.0199 | 0.0417 | 0.0008 | 0   | 171 | 238 | 16 | 264 | 5 | 0.09 |
| 11 | 6  | 66  | 124 | 0.53 | 0.0574 | 0.0052 | 0.3183 | 0.0281 | 0.0403 | 0.001  | 506 | 188 | 281 | 22 | 255 | 6 | 0.03 |
| 12 | 6  | 50  | 111 | 0.45 | 0.0572 | 0.0035 | 0.3394 | 0.0202 | 0.0431 | 0.0008 | 500 | 130 | 297 | 15 | 272 | 5 | 0.05 |
| 13 | 7  | 99  | 122 | 0.81 | 0.0537 | 0.0031 | 0.3301 | 0.0185 | 0.0447 | 0.0007 | 358 | 125 | 290 | 14 | 282 | 4 | 0.04 |
| 14 | 17 | 198 | 291 | 0.68 | 0.0515 | 0.0029 | 0.283  | 0.0156 | 0.0399 | 0.0006 | 265 | 125 | 253 | 12 | 252 | 4 | 0.07 |
| 15 | 11 | 99  | 191 | 0.52 | 0.0632 | 0.005  | 0.345  | 0.0263 | 0.0397 | 0.0009 | 714 | 159 | 301 | 20 | 251 | 5 | 0.01 |
| 16 | 13 | 151 | 223 | 0.68 | 0.0563 | 0.0034 | 0.3253 | 0.0192 | 0.042  | 0.0007 | 462 | 130 | 286 | 15 | 265 | 4 | 0.07 |
| 17 | 12 | 145 | 207 | 0.7  | 0.0486 | 0.0026 | 0.273  | 0.0144 | 0.0407 | 0.0006 | 130 | 122 | 245 | 11 | 257 | 4 | 0.09 |
| 18 | 9  | 125 | 154 | 0.81 | 0.0524 | 0.0027 | 0.3083 | 0.0157 | 0.0427 | 0.0007 | 305 | 114 | 273 | 12 | 269 | 4 | 0.11 |
| 19 | 9  | 122 | 152 | 0.81 | 0.0485 | 0.0026 | 0.2989 | 0.0159 | 0.0447 | 0.0007 | 124 | 123 | 266 | 12 | 282 | 4 | 0.12 |
| 20 | 11 | 140 | 193 | 0.73 | 0.0555 | 0.0025 | 0.3442 | 0.0154 | 0.045  | 0.0007 | 431 | 99  | 300 | 12 | 284 | 4 | 0.14 |
| 21 | 8  | 91  | 136 | 0.67 | 0.0499 | 0.0054 | 0.32   | 0.034  | 0.0465 | 0.0012 | 191 | 235 | 282 | 26 | 293 | 7 | 0.05 |
| 22 | 8  | 104 | 136 | 0.76 | 0.055  | 0.0044 | 0.3571 | 0.0281 | 0.0471 | 0.001  | 412 | 171 | 310 | 21 | 297 | 6 | 0.07 |
| 23 | 8  | 110 | 131 | 0.84 | 0.0538 | 0.0051 | 0.3518 | 0.0325 | 0.0475 | 0.0011 | 360 | 201 | 306 | 24 | 299 | 7 | 0.03 |
| 24 | 6  | 77  | 103 | 0.75 | 0.0568 | 0.005  | 0.36   | 0.031  | 0.0459 | 0.0011 | 485 | 185 | 312 | 23 | 289 | 7 | 0.05 |
| 25 | 14 | 139 | 143 | 0.97 | 0.0625 | 0.0056 | 0.3635 | 0.0316 | 0.0421 | 0.001  | 692 | 180 | 315 | 24 | 266 | 6 | 0.03 |
| 26 | 23 | 385 | 359 | 1.07 | 0.0565 | 0.0019 | 0.3646 | 0.0119 | 0.0467 | 0.0006 | 472 | 73  | 316 | 9  | 295 | 4 | 0.11 |
| 27 | 11 | 129 | 180 | 0.72 | 0.051  | 0.0025 | 0.3343 | 0.0158 | 0.0475 | 0.0007 | 239 | 108 | 293 | 12 | 299 | 4 | 0.03 |
| 28 | 11 | 104 | 194 | 0.54 | 0.056  | 0.003  | 0.3629 | 0.0188 | 0.0469 | 0.0008 | 453 | 114 | 314 | 14 | 296 | 5 | 0.04 |
| 29 | 12 | 132 | 220 | 0.6  | 0.0597 | 0.0024 | 0.3649 | 0.0144 | 0.0443 | 0.0006 | 593 | 85  | 316 | 11 | 279 | 4 | 0.12 |
| 30 | 10 | 129 | 149 | 0.87 | 0.0587 | 0.0026 | 0.3648 | 0.016  | 0.045  | 0.0007 | 557 | 95  | 316 | 12 | 284 | 4 | 0.13 |

---

Syenite (04-B30)

|   |   |    |     |      |        |        |        |        |        |        |    |     |     |    |     |   |      |
|---|---|----|-----|------|--------|--------|--------|--------|--------|--------|----|-----|-----|----|-----|---|------|
| 1 | 7 | 58 | 127 | 0.46 | 0.0477 | 0.0033 | 0.3019 | 0.0205 | 0.0459 | 0.0008 | 82 | 158 | 268 | 16 | 290 | 5 | 0.06 |
|---|---|----|-----|------|--------|--------|--------|--------|--------|--------|----|-----|-----|----|-----|---|------|

|    |    |     |     |      |        |        |        |        |        |        |     |     |     |    |     |   |       |
|----|----|-----|-----|------|--------|--------|--------|--------|--------|--------|-----|-----|-----|----|-----|---|-------|
| 2  | 4  | 41  | 80  | 0.52 | 0.0535 | 0.004  | 0.3294 | 0.0241 | 0.0447 | 0.0009 | 349 | 161 | 289 | 18 | 282 | 5 | 0.05  |
| 3  | 6  | 60  | 96  | 0.62 | 0.0583 | 0.0038 | 0.3597 | 0.0229 | 0.0448 | 0.0008 | 541 | 137 | 312 | 17 | 282 | 5 | 0.05  |
| 4  | 10 | 147 | 178 | 0.83 | 0.0494 | 0.0026 | 0.2977 | 0.0155 | 0.0437 | 0.0007 | 168 | 120 | 265 | 12 | 276 | 4 | 0.10  |
| 5  | 8  | 107 | 134 | 0.8  | 0.0532 | 0.0029 | 0.3189 | 0.0172 | 0.0435 | 0.0007 | 338 | 120 | 281 | 13 | 274 | 4 | 0.11  |
| 6  | 10 | 158 | 160 | 0.99 | 0.0525 | 0.0029 | 0.3125 | 0.017  | 0.0432 | 0.0007 | 306 | 122 | 276 | 13 | 273 | 4 | 0.09  |
| 7  | 9  | 111 | 138 | 0.81 | 0.0569 | 0.0027 | 0.3561 | 0.0164 | 0.0454 | 0.0007 | 488 | 101 | 309 | 12 | 286 | 4 | 0.06  |
| 8  | 20 | 282 | 316 | 0.89 | 0.0512 | 0.0018 | 0.3194 | 0.0109 | 0.0453 | 0.0006 | 250 | 78  | 281 | 8  | 285 | 3 | 0.09  |
| 9  | 12 | 116 | 180 | 0.64 | 0.0539 | 0.0024 | 0.3301 | 0.0143 | 0.0444 | 0.0006 | 369 | 96  | 290 | 11 | 280 | 4 | 0.07  |
| 10 | 14 | 96  | 246 | 0.39 | 0.0506 | 0.002  | 0.3228 | 0.0125 | 0.0463 | 0.0006 | 221 | 89  | 284 | 10 | 292 | 4 | 0.10  |
| 11 | 5  | 52  | 92  | 0.57 | 0.0549 | 0.0035 | 0.3371 | 0.0212 | 0.0445 | 0.0008 | 409 | 138 | 295 | 16 | 281 | 5 | 0.08  |
| 12 | 9  | 96  | 137 | 0.7  | 0.0529 | 0.0028 | 0.3342 | 0.0175 | 0.0459 | 0.0007 | 324 | 117 | 293 | 13 | 289 | 4 | 0.11  |
| 13 | 8  | 75  | 115 | 0.65 | 0.0497 | 0.0029 | 0.3    | 0.0168 | 0.0438 | 0.0007 | 182 | 128 | 266 | 13 | 276 | 4 | -0.01 |
| 14 | 11 | 94  | 184 | 0.51 | 0.045  | 0.0024 | 0.2935 | 0.0154 | 0.0473 | 0.0007 | 0   | 71  | 261 | 12 | 298 | 4 | 0.08  |
| 15 | 13 | 99  | 226 | 0.44 | 0.0534 | 0.0023 | 0.3431 | 0.0145 | 0.0466 | 0.0006 | 347 | 95  | 300 | 11 | 294 | 4 | 0.10  |
| 16 | 8  | 96  | 135 | 0.71 | 0.0473 | 0.0026 | 0.2944 | 0.016  | 0.0451 | 0.0007 | 66  | 127 | 262 | 13 | 285 | 4 | 0.10  |
| 17 | 12 | 164 | 210 | 0.78 | 0.0546 | 0.0026 | 0.327  | 0.0151 | 0.0435 | 0.0006 | 396 | 102 | 287 | 12 | 274 | 4 | 0.06  |
| 18 | 9  | 107 | 147 | 0.73 | 0.0496 | 0.0027 | 0.3134 | 0.0168 | 0.0458 | 0.0007 | 177 | 123 | 277 | 13 | 289 | 4 | 0.09  |
| 19 | 7  | 87  | 125 | 0.7  | 0.0517 | 0.0031 | 0.3202 | 0.0189 | 0.0449 | 0.0007 | 273 | 133 | 282 | 15 | 283 | 5 | 0.08  |
| 20 | 8  | 121 | 132 | 0.92 | 0.0511 | 0.003  | 0.3136 | 0.0179 | 0.0446 | 0.0007 | 243 | 129 | 277 | 14 | 281 | 4 | 0.04  |
| 21 | 15 | 156 | 259 | 0.6  | 0.0507 | 0.0021 | 0.3177 | 0.0128 | 0.0455 | 0.0006 | 228 | 93  | 280 | 10 | 287 | 4 | 0.08  |
| 22 | 12 | 148 | 191 | 0.78 | 0.0499 | 0.0024 | 0.3183 | 0.015  | 0.0463 | 0.0007 | 189 | 109 | 281 | 12 | 292 | 4 | 0.08  |
| 23 | 13 | 162 | 208 | 0.78 | 0.0477 | 0.0023 | 0.3001 | 0.0141 | 0.0456 | 0.0006 | 85  | 111 | 267 | 11 | 288 | 4 | 0.06  |
| 24 | 14 | 109 | 262 | 0.41 | 0.0497 | 0.0022 | 0.2967 | 0.0127 | 0.0433 | 0.0006 | 180 | 99  | 264 | 10 | 274 | 4 | 0.05  |
| 25 | 6  | 59  | 111 | 0.53 | 0.0522 | 0.0033 | 0.3083 | 0.0193 | 0.0429 | 0.0008 | 293 | 140 | 273 | 15 | 271 | 5 | 0.10  |
| 26 | 15 | 182 | 267 | 0.68 | 0.0463 | 0.0023 | 0.28   | 0.0135 | 0.0439 | 0.0006 | 14  | 114 | 251 | 11 | 277 | 4 | 0.04  |
| 27 | 8  | 91  | 125 | 0.73 | 0.0492 | 0.0031 | 0.3103 | 0.019  | 0.0457 | 0.0008 | 158 | 141 | 274 | 15 | 288 | 5 | 0.03  |
| 28 | 10 | 153 | 161 | 0.95 | 0.0478 | 0.0027 | 0.2887 | 0.0159 | 0.0439 | 0.0007 | 86  | 129 | 258 | 13 | 277 | 4 | 0.05  |
| 29 | 9  | 121 | 145 | 0.83 | 0.0544 | 0.0029 | 0.3389 | 0.0178 | 0.0452 | 0.0007 | 388 | 116 | 296 | 13 | 285 | 4 | 0.10  |
| 30 | 12 | 186 | 191 | 0.98 | 0.0538 | 0.0027 | 0.3168 | 0.0152 | 0.0427 | 0.0006 | 362 | 107 | 279 | 12 | 270 | 4 | 0.00  |

Syenite (04-B32)

|   |   |    |    |      |        |        |        |        |        |        |     |     |     |    |     |   |      |
|---|---|----|----|------|--------|--------|--------|--------|--------|--------|-----|-----|-----|----|-----|---|------|
| 1 | 6 | 64 | 95 | 0.67 | 0.0527 | 0.0033 | 0.3447 | 0.0212 | 0.0475 | 0.0008 | 318 | 137 | 301 | 16 | 299 | 5 | 0.07 |
|---|---|----|----|------|--------|--------|--------|--------|--------|--------|-----|-----|-----|----|-----|---|------|

|    |    |     |      |      |        |        |        |        |        |        |     |     |     |    |     |   |       |
|----|----|-----|------|------|--------|--------|--------|--------|--------|--------|-----|-----|-----|----|-----|---|-------|
| 2  | 8  | 72  | 151  | 0.48 | 0.0485 | 0.0024 | 0.3128 | 0.0153 | 0.0468 | 0.0007 | 124 | 113 | 276 | 12 | 295 | 4 | 0.11  |
| 3  | 9  | 103 | 150  | 0.68 | 0.0501 | 0.0025 | 0.3112 | 0.0154 | 0.0451 | 0.0007 | 200 | 114 | 275 | 12 | 284 | 4 | 0.12  |
| 4  | 5  | 50  | 92   | 0.54 | 0.0522 | 0.0031 | 0.3374 | 0.0195 | 0.0469 | 0.0008 | 296 | 130 | 295 | 15 | 296 | 5 | 0.04  |
| 5  | 6  | 69  | 107  | 0.64 | 0.0483 | 0.0027 | 0.3078 | 0.017  | 0.0462 | 0.0007 | 116 | 128 | 273 | 13 | 291 | 5 | 0.10  |
| 6  | 6  | 53  | 93   | 0.57 | 0.0602 | 0.0041 | 0.3713 | 0.0244 | 0.0448 | 0.0009 | 611 | 140 | 321 | 18 | 282 | 5 | 0.02  |
| 7  | 8  | 94  | 131  | 0.72 | 0.0481 | 0.0025 | 0.3074 | 0.0153 | 0.0465 | 0.0007 | 102 | 116 | 272 | 12 | 293 | 4 | 0.00  |
| 8  | 6  | 53  | 96   | 0.56 | 0.0493 | 0.0034 | 0.3245 | 0.0216 | 0.0478 | 0.0008 | 161 | 152 | 285 | 17 | 301 | 5 | -0.01 |
| 9  | 8  | 61  | 145  | 0.42 | 0.05   | 0.0024 | 0.3039 | 0.0139 | 0.0441 | 0.0006 | 196 | 106 | 269 | 11 | 278 | 4 | -0.01 |
| 10 | 7  | 79  | 119  | 0.66 | 0.0499 | 0.0026 | 0.3161 | 0.016  | 0.046  | 0.0007 | 190 | 116 | 279 | 12 | 290 | 4 | 0.05  |
| 11 | 5  | 47  | 79   | 0.6  | 0.0499 | 0.0033 | 0.3191 | 0.0204 | 0.0465 | 0.0008 | 188 | 145 | 281 | 16 | 293 | 5 | 0.00  |
| 12 | 5  | 51  | 75   | 0.68 | 0.0504 | 0.0042 | 0.3269 | 0.0266 | 0.0471 | 0.001  | 213 | 182 | 287 | 20 | 297 | 6 | 0.03  |
| 13 | 9  | 91  | 150  | 0.61 | 0.051  | 0.003  | 0.3047 | 0.0173 | 0.0434 | 0.0007 | 239 | 129 | 270 | 13 | 274 | 4 | 0.02  |
| 14 | 8  | 97  | 132  | 0.74 | 0.0508 | 0.0024 | 0.3149 | 0.0147 | 0.0451 | 0.0007 | 230 | 107 | 278 | 11 | 284 | 4 | 0.12  |
| 15 | 6  | 67  | 102  | 0.66 | 0.0446 | 0.0027 | 0.2845 | 0.0169 | 0.0463 | 0.0007 | 0   | 66  | 254 | 13 | 292 | 5 | 0.06  |
| 16 | 17 | 270 | 249  | 1.09 | 0.0534 | 0.0022 | 0.317  | 0.0129 | 0.0431 | 0.0006 | 344 | 92  | 280 | 10 | 272 | 4 | 0.13  |
| 17 | 4  | 53  | 76   | 0.7  | 0.0499 | 0.0033 | 0.2936 | 0.0189 | 0.0427 | 0.0008 | 192 | 146 | 261 | 15 | 270 | 5 | 0.04  |
| 18 | 6  | 67  | 98   | 0.68 | 0.0474 | 0.0031 | 0.2938 | 0.0185 | 0.045  | 0.0008 | 70  | 147 | 262 | 15 | 284 | 5 | -0.01 |
| 19 | 7  | 94  | 117  | 0.8  | 0.0486 | 0.0026 | 0.2973 | 0.0158 | 0.0444 | 0.0007 | 129 | 123 | 264 | 12 | 280 | 4 | 0.12  |
| 20 | 21 | 187 | 397  | 0.47 | 0.0565 | 0.0022 | 0.3519 | 0.0132 | 0.0452 | 0.0006 | 471 | 84  | 306 | 10 | 285 | 4 | 0.07  |
| 21 | 6  | 89  | 107  | 0.83 | 0.0554 | 0.0031 | 0.3375 | 0.0181 | 0.0442 | 0.0007 | 429 | 118 | 295 | 14 | 279 | 4 | 0.00  |
| 22 | 7  | 69  | 115  | 0.6  | 0.0492 | 0.0027 | 0.2922 | 0.0158 | 0.0431 | 0.0007 | 156 | 124 | 260 | 12 | 272 | 4 | 0.09  |
| 23 | 5  | 52  | 93   | 0.56 | 0.048  | 0.0029 | 0.2978 | 0.0174 | 0.045  | 0.0007 | 101 | 136 | 265 | 14 | 284 | 4 | 0.01  |
| 24 | 10 | 96  | 141  | 0.68 | 0.0507 | 0.0035 | 0.3257 | 0.0218 | 0.0466 | 0.0009 | 226 | 151 | 286 | 17 | 294 | 5 | 0.02  |
| 25 | 6  | 56  | 100  | 0.56 | 0.0491 | 0.003  | 0.3027 | 0.0183 | 0.0447 | 0.0007 | 153 | 139 | 269 | 14 | 282 | 5 | 0.10  |
| 26 | 6  | 57  | 105  | 0.54 | 0.0482 | 0.0027 | 0.3006 | 0.0165 | 0.0452 | 0.0007 | 110 | 128 | 267 | 13 | 285 | 4 | 0.07  |
| 27 | 6  | 58  | 93   | 0.63 | 0.0572 | 0.0034 | 0.3547 | 0.0207 | 0.045  | 0.0008 | 500 | 127 | 308 | 16 | 283 | 5 | 0.09  |
| 28 | 6  | 62  | 106  | 0.59 | 0.0448 | 0.0029 | 0.2772 | 0.0175 | 0.0449 | 0.0007 | 0   | 83  | 248 | 14 | 283 | 5 | 0.03  |
| 29 | 7  | 84  | 119  | 0.71 | 0.0471 | 0.0028 | 0.2878 | 0.0167 | 0.0443 | 0.0007 | 55  | 136 | 257 | 13 | 279 | 4 | 0.05  |
| 30 | 95 | 677 | 1855 | 0.36 | 0.0505 | 0.0017 | 0.2828 | 0.0092 | 0.0406 | 0.0005 | 218 | 76  | 253 | 7  | 257 | 3 | 0.10  |
| 31 | 6  | 69  | 111  | 0.62 | 0.0526 | 0.0029 | 0.3033 | 0.0163 | 0.0418 | 0.0007 | 311 | 120 | 269 | 13 | 264 | 4 | 0.06  |
| 32 | 8  | 110 | 129  | 0.85 | 0.0485 | 0.0025 | 0.2888 | 0.0144 | 0.0431 | 0.0006 | 125 | 116 | 258 | 11 | 272 | 4 | 0.03  |

|                 |     |      |      |      |        |        |        |        |        |        |     |     |     |    |     |   |       |
|-----------------|-----|------|------|------|--------|--------|--------|--------|--------|--------|-----|-----|-----|----|-----|---|-------|
| 33              | 7   | 77   | 128  | 0.6  | 0.0478 | 0.0025 | 0.2793 | 0.014  | 0.0423 | 0.0006 | 90  | 119 | 250 | 11 | 267 | 4 | -0.01 |
| Dacite (Shun 1) |     |      |      |      |        |        |        |        |        |        |     |     |     |    |     |   |       |
| 1               | 7   | 58   | 130  | 0.44 | 0.0522 | 0.0025 | 0.3484 | 0.0163 | 0.0484 | 0.0007 | 293 | 106 | 304 | 12 | 305 | 4 | 0.08  |
| 2               | 7   | 66   | 131  | 0.5  | 0.0525 | 0.0025 | 0.3229 | 0.0149 | 0.0446 | 0.0007 | 305 | 104 | 284 | 11 | 281 | 4 | 0.06  |
| 3               | 13  | 105  | 264  | 0.4  | 0.0519 | 0.0017 | 0.3035 | 0.0096 | 0.0424 | 0.0005 | 283 | 73  | 269 | 8  | 267 | 3 | 0.10  |
| 4               | 56  | 371  | 961  | 0.39 | 0.0521 | 0.0011 | 0.3547 | 0.007  | 0.0493 | 0.0005 | 291 | 45  | 308 | 5  | 310 | 3 | 0.14  |
| 5               | 34  | 269  | 593  | 0.45 | 0.0538 | 0.0018 | 0.3384 | 0.0108 | 0.0456 | 0.0006 | 364 | 72  | 296 | 8  | 287 | 3 | 0.06  |
| 6               | 19  | 201  | 323  | 0.62 | 0.0524 | 0.0021 | 0.3353 | 0.0129 | 0.0464 | 0.0006 | 301 | 87  | 294 | 10 | 293 | 4 | 0.05  |
| 7               | 7   | 87   | 126  | 0.69 | 0.0509 | 0.0025 | 0.3162 | 0.0154 | 0.0451 | 0.0007 | 235 | 111 | 279 | 12 | 284 | 4 | 0.13  |
| 8               | 7   | 71   | 115  | 0.62 | 0.053  | 0.0038 | 0.3473 | 0.024  | 0.0475 | 0.0009 | 329 | 153 | 303 | 18 | 299 | 6 | 0.00  |
| 9               | 24  | 237  | 416  | 0.57 | 0.0531 | 0.0014 | 0.3322 | 0.0084 | 0.0454 | 0.0005 | 332 | 58  | 291 | 6  | 286 | 3 | 0.13  |
| 10              | 3   | 25   | 52   | 0.48 | 0.0508 | 0.0042 | 0.3138 | 0.0252 | 0.0448 | 0.0009 | 231 | 180 | 277 | 19 | 283 | 6 | 0.01  |
| 11              | 3   | 28   | 58   | 0.48 | 0.0498 | 0.0035 | 0.3067 | 0.021  | 0.0446 | 0.0008 | 187 | 155 | 272 | 16 | 282 | 5 | 0.04  |
| 12              | 3   | 28   | 54   | 0.52 | 0.0513 | 0.0038 | 0.3172 | 0.0232 | 0.0448 | 0.0009 | 255 | 163 | 280 | 18 | 283 | 5 | 0.08  |
| 13              | 137 | 1193 | 2729 | 0.44 | 0.0496 | 0.0007 | 0.2942 | 0.0042 | 0.043  | 0.0004 | 178 | 34  | 262 | 3  | 271 | 3 | 0.37  |
| 14              | 11  | 71   | 205  | 0.35 | 0.0506 | 0.0021 | 0.3046 | 0.0125 | 0.0437 | 0.0006 | 222 | 94  | 270 | 10 | 276 | 4 | 0.13  |
| 15              | 5   | 35   | 85   | 0.41 | 0.0517 | 0.0032 | 0.3346 | 0.0203 | 0.047  | 0.0008 | 273 | 137 | 293 | 15 | 296 | 5 | 0.07  |
| 16              | 3   | 33   | 60   | 0.55 | 0.0532 | 0.0033 | 0.3257 | 0.0199 | 0.0444 | 0.0008 | 338 | 135 | 286 | 15 | 280 | 5 | 0.09  |
| 17              | 6   | 46   | 102  | 0.45 | 0.054  | 0.0028 | 0.3305 | 0.0168 | 0.0444 | 0.0007 | 371 | 113 | 290 | 13 | 280 | 4 | 0.09  |
| 18              | 18  | 220  | 274  | 0.8  | 0.0582 | 0.0021 | 0.3554 | 0.0124 | 0.0443 | 0.0006 | 536 | 77  | 309 | 9  | 280 | 4 | 0.09  |
| 19              | 19  | 179  | 350  | 0.51 | 0.049  | 0.0021 | 0.3072 | 0.0125 | 0.0455 | 0.0006 | 149 | 95  | 272 | 10 | 287 | 4 | 0.00  |
| 20              | 11  | 78   | 190  | 0.41 | 0.0521 | 0.002  | 0.3172 | 0.012  | 0.0442 | 0.0006 | 289 | 86  | 280 | 9  | 279 | 4 | 0.13  |
| 21              | 5   | 62   | 89   | 0.7  | 0.0561 | 0.0044 | 0.3379 | 0.0258 | 0.0437 | 0.001  | 455 | 166 | 296 | 20 | 276 | 6 | 0.05  |
| 22              | 69  | 738  | 1247 | 0.59 | 0.0539 | 0.001  | 0.3269 | 0.006  | 0.044  | 0.0005 | 368 | 42  | 287 | 5  | 278 | 3 | 0.27  |
| 23              | 11  | 82   | 194  | 0.42 | 0.0485 | 0.0017 | 0.3189 | 0.0112 | 0.0478 | 0.0006 | 122 | 82  | 281 | 9  | 301 | 4 | 0.19  |
| 24              | 14  | 106  | 268  | 0.39 | 0.0471 | 0.0013 | 0.2819 | 0.0073 | 0.0435 | 0.0005 | 52  | 62  | 252 | 6  | 274 | 3 | 0.06  |
| 25              | 8   | 89   | 131  | 0.68 | 0.0541 | 0.003  | 0.3265 | 0.0177 | 0.0438 | 0.0007 | 374 | 121 | 287 | 14 | 277 | 5 | 0.08  |
| 26              | 9   | 60   | 152  | 0.39 | 0.0546 | 0.0023 | 0.3631 | 0.015  | 0.0483 | 0.0007 | 396 | 92  | 315 | 11 | 304 | 4 | 0.11  |
| 27              | 26  | 165  | 467  | 0.35 | 0.0466 | 0.0016 | 0.2877 | 0.0093 | 0.0448 | 0.0006 | 29  | 78  | 257 | 7  | 283 | 3 | 0.02  |
| 28              | 9   | 86   | 149  | 0.57 | 0.0474 | 0.0022 | 0.3204 | 0.0143 | 0.0491 | 0.0007 | 69  | 106 | 282 | 11 | 309 | 4 | 0.03  |
| 29              | 7   | 71   | 108  | 0.66 | 0.0504 | 0.0026 | 0.3286 | 0.0162 | 0.0473 | 0.0007 | 215 | 113 | 289 | 12 | 298 | 4 | 0.00  |

|    |    |     |      |      |        |        |        |        |        |        |      |     |     |    |     |   |      |
|----|----|-----|------|------|--------|--------|--------|--------|--------|--------|------|-----|-----|----|-----|---|------|
| 30 | 5  | 36  | 57   | 0.64 | 0.0554 | 0.0044 | 0.3527 | 0.0272 | 0.0463 | 0.001  | 426  | 168 | 307 | 20 | 292 | 6 | 0.03 |
| 31 | 10 | 36  | 58   | 0.62 | 0.1467 | 0.0086 | 0.9902 | 0.0537 | 0.049  | 0.0012 | 2308 | 97  | 699 | 27 | 308 | 7 | 0.04 |
| 32 | 70 | 467 | 1135 | 0.41 | 0.0463 | 0.0009 | 0.3183 | 0.0061 | 0.0499 | 0.0005 | 14   | 46  | 281 | 5  | 314 | 3 | 0.25 |
| 33 | 33 | 233 | 572  | 0.41 | 0.0471 | 0.0013 | 0.2939 | 0.0076 | 0.0453 | 0.0005 | 56   | 62  | 262 | 6  | 285 | 3 | 0.07 |
| 34 | 4  | 32  | 71   | 0.45 | 0.0517 | 0.0031 | 0.3256 | 0.0191 | 0.0457 | 0.0008 | 272  | 133 | 286 | 15 | 288 | 5 | 0.07 |
| 35 | 5  | 46  | 74   | 0.62 | 0.0457 | 0.0027 | 0.2965 | 0.0172 | 0.0471 | 0.0008 | 0    | 117 | 264 | 13 | 297 | 5 | 0.07 |

*Li et al. (2007)*

| Th/U | Isotope ratio                        |        |                                     |        |                                     |        | Age (Ma)                             |       |                                     |      |                                     |      | RHO   |
|------|--------------------------------------|--------|-------------------------------------|--------|-------------------------------------|--------|--------------------------------------|-------|-------------------------------------|------|-------------------------------------|------|-------|
|      | <sup>207</sup> Pb/ <sup>206</sup> Pb | 1σ     | <sup>207</sup> Pb/ <sup>235</sup> U | 1σ     | <sup>206</sup> Pb/ <sup>238</sup> U | 1σ     | <sup>207</sup> Pb/ <sup>206</sup> Pb | 1σ    | <sup>207</sup> Pb/ <sup>235</sup> U | 1σ   | <sup>206</sup> Pb/ <sup>238</sup> U | 1σ   |       |
| 0.51 | 0.0554                               | 0.0016 | 0.3289                              | 0.0087 | 0.0431                              | 0.0003 | 428.3                                | 61.87 | 288.7                               | 6.65 | 271.8                               | 2    | -0.14 |
| 0.49 | 0.0528                               | 0.0013 | 0.3168                              | 0.0074 | 0.0435                              | 0.0003 | 319.1                                | 56.42 | 279.4                               | 5.67 | 274.8                               | 1.82 | -0.20 |
| 0.41 | 0.0518                               | 0.0013 | 0.3154                              | 0.0069 | 0.0441                              | 0.0003 | 278.2                                | 54.24 | 278.3                               | 5.34 | 278.4                               | 1.77 | -0.20 |
| 0.45 | 0.052                                | 0.0012 | 0.3096                              | 0.0067 | 0.0432                              | 0.0003 | 283.5                                | 53.7  | 273.9                               | 5.21 | 272.8                               | 1.73 | -0.20 |
| 0.56 | 0.0514                               | 0.0011 | 0.3081                              | 0.0056 | 0.0435                              | 0.0003 | 260                                  | 46.75 | 272.7                               | 4.36 | 274.2                               | 1.57 | -0.29 |
| 0.62 | 0.0506                               | 0.0011 | 0.3058                              | 0.0061 | 0.0438                              | 0.0003 | 224.5                                | 50.67 | 270.9                               | 4.75 | 276.3                               | 1.66 | -0.25 |
| 0.58 | 0.0524                               | 0.0018 | 0.3093                              | 0.0101 | 0.0428                              | 0.0004 | 302.2                                | 76.77 | 273.7                               | 7.86 | 270.3                               | 2.26 | -0.08 |
| 0.53 | 0.0534                               | 0.0013 | 0.3146                              | 0.007  | 0.0428                              | 0.0003 | 344.5                                | 54.63 | 277.7                               | 5.43 | 269.8                               | 1.75 | -0.21 |
| 0.67 | 0.0527                               | 0.0015 | 0.3149                              | 0.0084 | 0.0433                              | 0.0003 | 317.1                                | 63.77 | 278                                 | 6.5  | 273.3                               | 1.95 | -0.13 |
| 0.66 | 0.052                                | 0.0018 | 0.306                               | 0.0098 | 0.0426                              | 0.0004 | 287                                  | 75.16 | 271                                 | 7.59 | 269.2                               | 2.2  | -0.08 |
| 0.51 | 0.0522                               | 0.001  | 0.3148                              | 0.0051 | 0.0437                              | 0.0002 | 294                                  | 42.15 | 277.9                               | 3.9  | 275.9                               | 1.49 | -0.37 |
| 0.58 | 0.0537                               | 0.0016 | 0.3215                              | 0.0086 | 0.0434                              | 0.0003 | 356.8                                | 63.68 | 283.1                               | 6.63 | 274.1                               | 2    | -0.16 |
| 0.53 | 0.0663                               | 0.0021 | 0.4014                              | 0.012  | 0.0439                              | 0.0004 | 815.3                                | 65.31 | 342.7                               | 8.7  | 277                                 | 2.39 | -0.10 |
| 0.54 | 0.0526                               | 0.0011 | 0.3506                              | 0.0064 | 0.0483                              | 0.0003 | 313.5                                | 46.13 | 305.1                               | 4.78 | 303.9                               | 1.74 | -0.28 |
| 0.49 | 0.0523                               | 0.0013 | 0.3482                              | 0.0077 | 0.0483                              | 0.0003 | 297.6                                | 54.51 | 303.3                               | 5.81 | 304                                 | 1.93 | -0.20 |
| 0.55 | 0.0611                               | 0.0021 | 0.3384                              | 0.0107 | 0.0401                              | 0.0004 | 643.7                                | 70.58 | 295.9                               | 8.12 | 253.6                               | 2.19 | -0.08 |
| 0.42 | 0.0528                               | 0.0016 | 0.3165                              | 0.0091 | 0.0435                              | 0.0003 | 319.2                                | 67.94 | 279.2                               | 6.99 | 274.4                               | 2.07 | -0.11 |
| 0.5  | 0.0528                               | 0.0012 | 0.3146                              | 0.0066 | 0.0432                              | 0.0003 | 319.6                                | 51.64 | 277.8                               | 5.07 | 272.7                               | 1.66 | -0.23 |
| 0.54 | 0.0513                               | 0.0014 | 0.3112                              | 0.0076 | 0.044                               | 0.0003 | 253.5                                | 59.97 | 275.1                               | 5.91 | 277.5                               | 1.86 | -0.17 |
| 0.61 | 0.0521                               | 0.0018 | 0.3057                              | 0.0097 | 0.0425                              | 0.0004 | 290.6                                | 74.61 | 270.8                               | 7.52 | 268.4                               | 2.17 | -0.11 |

Zhang *et al.* (2008)



| Spot    | Pb<br>ppm | Th<br>ppm | U<br>ppm | Th/U | Isotope ratio                        |      |                                     |      |                                     |     | Age (Ma)                            |     | RHO    |
|---------|-----------|-----------|----------|------|--------------------------------------|------|-------------------------------------|------|-------------------------------------|-----|-------------------------------------|-----|--------|
|         |           |           |          |      | <sup>207</sup> Pb/ <sup>206</sup> Pb | 1σ   | <sup>207</sup> Pb/ <sup>235</sup> U | 1σ   | <sup>206</sup> Pb/ <sup>238</sup> U | 1σ  | <sup>206</sup> Pb/ <sup>238</sup> U | 1σ  |        |
| 78-1.1  | 3.5       | 46        | 89       | 0.53 | 0.062                                | 11.3 | 0.39                                | 11.5 | 0.0453                              | 1.7 | 282.4                               | 5   | 0.1905 |
| 78-2.1  | 4.9       | 76        | 122      | 0.64 | 0.0683                               | 5.9  | 0.44                                | 6.1  | 0.0471                              | 1.3 | 293.9                               | 4.4 | 0.2579 |
| 78-3.1  | 3.4       | 62        | 84       | 0.76 | 0.045                                | 18   | 0.28                                | 18.1 | 0.0455                              | 1.8 | 287.9                               | 5.4 | 0.1051 |
| 78-4.1  | 3         | 55        | 73       | 0.78 | 0.0679                               | 17.5 | 0.43                                | 17.6 | 0.0462                              | 2   | 286.9                               | 6.6 | 0.1067 |
| 78-5.1  | 3.3       | 51        | 82       | 0.64 | 0.0566                               | 14.5 | 0.36                                | 14.6 | 0.0455                              | 1.8 | 285.2                               | 5.6 | 0.117  |
| 78-6.1  | 5.2       | 102       | 134      | 0.79 | 0.0588                               | 8.7  | 0.36                                | 8.8  | 0.0443                              | 1.3 | 278.3                               | 4.3 | 0.1503 |
| 78-7.1  | 3.6       | 65        | 92       | 0.73 | 0.052                                | 20.5 | 0.32                                | 20.5 | 0.0447                              | 1.9 | 288.4                               | 5.1 | 0.0463 |
| 78-8.1  | 3.4       | 52        | 85       | 0.64 | 0.0407                               | 25   | 0.25                                | 25.1 | 0.0441                              | 1.9 | 289.4                               | 6.6 | 0.0904 |
| 78-9.1  | 5         | 97        | 126      | 0.79 | 0.0694                               | 7.4  | 0.44                                | 7.5  | 0.0459                              | 1.5 | 288.7                               | 5.3 | 0.1662 |
| 78-10.1 | 3.6       | 53        | 88       | 0.62 | 0.0637                               | 14.4 | 0.41                                | 14.5 | 0.0462                              | 1.9 | 289.9                               | 6   | 0.118  |
| 78-11.1 | 4.3       | 88        | 113      | 0.81 | 0.0529                               | 16.3 | 0.32                                | 16.3 | 0.0436                              | 1.5 | 274.9                               | 5.2 | 0.046  |
| 78-12.1 | 5.3       | 81        | 135      | 0.62 | 0.0419                               | 25.2 | 0.25                                | 25.3 | 0.0438                              | 1.6 | 286.2                               | 4.1 | 0.094  |
| 78-13.1 | 4.3       | 89        | 112      | 0.82 | 0.0611                               | 12.1 | 0.37                                | 12.2 | 0.0441                              | 1.5 | 278.1                               | 4.7 | 0.1279 |
| 78-14.1 | 2.8       | 44        | 68       | 0.67 | 0.052                                | 37.7 | 0.32                                | 37.8 | 0.0451                              | 2.7 | 292.3                               | 5.8 | 0.0727 |
| 78-15.1 | 13.8      | 220       | 321      | 0.71 | 0.072                                | 8    | 0.48                                | 8.1  | 0.0482                              | 1   | 290.9                               | 4.3 | 0.1611 |

Sun *et al.* (2008)

| Spot                         | Pb<br>ppm | Th<br>ppm | U<br>ppm | Th/U | Isotope ratio                        |        |                                     |        |                                     |        | Age (Ma)                             |     |                                     |    | RHO |                                     |      |
|------------------------------|-----------|-----------|----------|------|--------------------------------------|--------|-------------------------------------|--------|-------------------------------------|--------|--------------------------------------|-----|-------------------------------------|----|-----|-------------------------------------|------|
|                              |           |           |          |      | <sup>207</sup> Pb/ <sup>206</sup> Pb | 1σ     | <sup>207</sup> Pb/ <sup>235</sup> U | 1σ     | <sup>206</sup> Pb/ <sup>238</sup> U | 1σ     | <sup>207</sup> Pb/ <sup>206</sup> Pb | 1σ  | <sup>207</sup> Pb/ <sup>235</sup> U | 1σ |     | <sup>206</sup> Pb/ <sup>238</sup> U | 1σ   |
| pyroxene syenite             |           |           |          |      |                                      |        |                                     |        |                                     |        |                                      |     |                                     |    |     |                                     |      |
| 01-2-01                      | 3.12      | 37.12     | 59.26    | 1.6  | 0.0538                               | 0.0029 | 0.33                                | 0.0175 | 0.0445                              | 0.0007 | 361                                  | 90  | 290                                 | 13 | 281 | 5                                   | 0.09 |
| 01-2-03                      | 3.19      | 41.49     | 58.43    | 1.41 | 0.0526                               | 0.003  | 0.3241                              | 0.0182 | 0.0447                              | 0.0008 | 309                                  | 97  | 285                                 | 14 | 282 | 5                                   | 0.11 |
| 01-2-05                      | 5.46      | 92.63     | 94.78    | 1.02 | 0.0514                               | 0.0023 | 0.3185                              | 0.0139 | 0.0449                              | 0.0007 | 261                                  | 72  | 281                                 | 11 | 283 | 4                                   | 0.11 |
| 01-2-06                      | 2.83      | 37.02     | 51.62    | 1.39 | 0.0518                               | 0.0029 | 0.3251                              | 0.0182 | 0.0455                              | 0.0008 | 278                                  | 98  | 286                                 | 14 | 287 | 5                                   | 0.16 |
| 01-2-07                      | 3.61      | 44.33     | 65.44    | 1.48 | 0.0521                               | 0.0027 | 0.3283                              | 0.0166 | 0.0457                              | 0.0007 | 288                                  | 86  | 288                                 | 13 | 288 | 5                                   | 0.07 |
| 01-2-08                      | 2.7       | 35.27     | 49.53    | 1.4  | 0.052                                | 0.0032 | 0.3187                              | 0.0195 | 0.0445                              | 0.0008 | 285                                  | 108 | 281                                 | 15 | 280 | 5                                   | 0.13 |
| 01-2-09                      | 9.56      | 160.41    | 163.45   | 1.02 | 0.0516                               | 0.0018 | 0.3205                              | 0.0111 | 0.0451                              | 0.0006 | 266                                  | 53  | 282                                 | 9  | 284 | 4                                   | 0.17 |
| 01-2-11                      | 9.66      | 152.38    | 169.3    | 1.11 | 0.0518                               | 0.0022 | 0.3205                              | 0.0132 | 0.0449                              | 0.0007 | 276                                  | 67  | 282                                 | 10 | 283 | 4                                   | 0.11 |
| 01-2-12                      | 2.87      | 40.97     | 52.18    | 1.27 | 0.0523                               | 0.003  | 0.3208                              | 0.0182 | 0.0445                              | 0.0008 | 297                                  | 99  | 283                                 | 14 | 281 | 5                                   | 0.12 |
| 01-2-13                      | 3.67      | 47.87     | 66.2     | 1.38 | 0.0525                               | 0.0029 | 0.3244                              | 0.0178 | 0.0449                              | 0.0008 | 306                                  | 95  | 285                                 | 14 | 283 | 5                                   | 0.14 |
| 01-2-14                      | 2.85      | 33.88     | 53.12    | 1.57 | 0.052                                | 0.0029 | 0.3237                              | 0.0178 | 0.0451                              | 0.0008 | 287                                  | 95  | 285                                 | 14 | 284 | 5                                   | 0.12 |
| 01-2-15                      | 5.05      | 60.34     | 93.94    | 1.56 | 0.053                                | 0.0023 | 0.3278                              | 0.0138 | 0.0449                              | 0.0007 | 328                                  | 68  | 288                                 | 11 | 283 | 4                                   | 0.10 |
| 01-2-16                      | 5.49      | 83.58     | 95.15    | 1.14 | 0.0539                               | 0.0026 | 0.3396                              | 0.016  | 0.0457                              | 0.0007 | 365                                  | 78  | 297                                 | 12 | 288 | 4                                   | 0.09 |
| 01-2-17                      | 4.94      | 70.29     | 89.24    | 1.27 | 0.054                                | 0.0025 | 0.3326                              | 0.0151 | 0.0447                              | 0.0007 | 369                                  | 74  | 292                                 | 12 | 282 | 4                                   | 0.11 |
| 01-2-18                      | 4.55      | 74.41     | 79.09    | 1.06 | 0.0542                               | 0.0025 | 0.3335                              | 0.015  | 0.0446                              | 0.0007 | 380                                  | 73  | 292                                 | 11 | 281 | 4                                   | 0.10 |
| 01-2-19                      | 2.87      | 26.85     | 55.13    | 2.05 | 0.0561                               | 0.003  | 0.347                               | 0.0185 | 0.0449                              | 0.0008 | 455                                  | 89  | 302                                 | 14 | 283 | 5                                   | 0.16 |
| 01-2-20                      | 2.97      | 38.94     | 54.53    | 1.4  | 0.0528                               | 0.003  | 0.3264                              | 0.0186 | 0.0449                              | 0.0008 | 318                                  | 98  | 287                                 | 14 | 283 | 5                                   | 0.17 |
| 01-2-21                      | 3.14      | 38.09     | 57.58    | 1.51 | 0.0541                               | 0.0028 | 0.337                               | 0.0173 | 0.0452                              | 0.0007 | 374                                  | 86  | 295                                 | 13 | 285 | 5                                   | 0.12 |
| 01-2-22                      | 3.95      | 43.75     | 73.79    | 1.69 | 0.0536                               | 0.0028 | 0.3363                              | 0.0174 | 0.0455                              | 0.0008 | 353                                  | 86  | 294                                 | 13 | 287 | 5                                   | 0.14 |
| 01-2-23                      | 3.27      | 42.66     | 59.41    | 1.39 | 0.0521                               | 0.0029 | 0.3234                              | 0.0178 | 0.045                               | 0.0008 | 291                                  | 95  | 285                                 | 14 | 284 | 5                                   | 0.13 |
| 01-2-24                      | 5.92      | 88.88     | 105.59   | 1.19 | 0.0513                               | 0.0025 | 0.3167                              | 0.015  | 0.0447                              | 0.0007 | 256                                  | 82  | 279                                 | 12 | 282 | 4                                   | 0.08 |
| 01-2-25                      | 2.67      | 33.49     | 49.44    | 1.48 | 0.0543                               | 0.0034 | 0.3328                              | 0.0204 | 0.0444                              | 0.0008 | 384                                  | 105 | 292                                 | 16 | 280 | 5                                   | 0.07 |
| 01-2-26                      | 8.72      | 155.27    | 149.71   | 0.96 | 0.0519                               | 0.002  | 0.315                               | 0.012  | 0.044                               | 0.0006 | 281                                  | 60  | 278                                 | 9  | 278 | 4                                   | 0.15 |
| 01-2-27                      | 4.18      | 61.8      | 73.36    | 1.19 | 0.0556                               | 0.0028 | 0.3461                              | 0.0174 | 0.0451                              | 0.0008 | 436                                  | 82  | 302                                 | 13 | 285 | 5                                   | 0.17 |
| 01-2-28                      | 3.41      | 43.93     | 60.41    | 1.38 | 0.0536                               | 0.0029 | 0.3375                              | 0.018  | 0.0457                              | 0.0008 | 354                                  | 90  | 295                                 | 14 | 288 | 5                                   | 0.12 |
| fine potash-feldspar-granite |           |           |          |      |                                      |        |                                     |        |                                     |        |                                      |     |                                     |    |     |                                     |      |
| 01-1-01                      | 4.09      | 53.4      | 76.85    | 1.44 | 0.0525                               | 0.0026 | 0.316                               | 0.0153 | 0.0436                              | 0.0007 | 308                                  | 82  | 279                                 | 12 | 275 | 4                                   | 0.10 |
| 01-1-02                      | 15.53     | 143.54    | 308.21   | 2.15 | 0.0516                               | 0.0014 | 0.3127                              | 0.0085 | 0.044                               | 0.0006 | 267                                  | 39  | 276                                 | 7  | 277 | 4                                   | 0.25 |

|         |       |        |        |      |        |        |        |        |        |        |     |    |      |    |     |   |      |
|---------|-------|--------|--------|------|--------|--------|--------|--------|--------|--------|-----|----|------|----|-----|---|------|
| 01-1-05 | 3.98  | 41.29  | 74.05  | 1.79 | 0.0525 | 0.0027 | 0.3312 | 0.0169 | 0.0458 | 0.0007 | 306 | 86 | 291  | 13 | 289 | 5 | 0.12 |
| 01-1-06 | 28.46 | 357.64 | 535.11 | 1.5  | 0.0506 | 0.0011 | 0.3088 | 0.0067 | 0.0442 | 0.0006 | 224 | 28 | 273  | 5  | 279 | 3 | 0.31 |
| 01-1-08 | 16.03 | 211.41 | 291.34 | 1.38 | 0.0517 | 0.0013 | 0.3229 | 0.008  | 0.0453 | 0.0006 | 271 | 33 | 284  | 6  | 286 | 4 | 0.24 |
| 01-1-11 | 3.23  | 31.85  | 64.23  | 2.02 | 0.0518 | 0.0028 | 0.3177 | 0.0168 | 0.0445 | 0.0007 | 276 | 92 | 280  | 13 | 281 | 4 | 0.07 |
| 01-1-17 | 4.79  | 77.95  | 84.3   | 1.08 | 0.0537 | 0.0025 | 0.324  | 0.0149 | 0.0437 | 0.0007 | 359 | 76 | 285  | 11 | 276 | 4 | 0.14 |
| 01-1-19 | 5.4   | 71.44  | 96.77  | 1.35 | 0.0564 | 0.0025 | 0.3577 | 0.0156 | 0.046  | 0.0007 | 468 | 69 | 310  | 12 | 290 | 4 | 0.13 |
| 01-1-20 | 3.86  | 56.01  | 68.53  | 1.22 | 0.0577 | 0.003  | 0.3575 | 0.0183 | 0.0449 | 0.0007 | 519 | 84 | 310  | 14 | 283 | 5 | 0.10 |
| 01-1-21 | 3.74  | 48.8   | 68.02  | 1.39 | 0.0555 | 0.0031 | 0.3464 | 0.0193 | 0.0453 | 0.0008 | 432 | 93 | 302  | 15 | 285 | 5 | 0.15 |
| 01-1-31 | 2.34  | 17.91  | 45.37  | 2.53 | 0.0544 | 0.0033 | 0.3453 | 0.0206 | 0.046  | 0.0008 | 389 | 10 | 3301 | 16 | 290 | 5 | 0.09 |

Sun *et al.* (2009)

| Spot            | Isotope ratio                     |            |                                  |            |                                  |            | Age (Ma)                         |            |                                  |            | RHO  |
|-----------------|-----------------------------------|------------|----------------------------------|------------|----------------------------------|------------|----------------------------------|------------|----------------------------------|------------|------|
|                 | $^{207}\text{Pb}/^{206}\text{Pb}$ | 1 $\sigma$ | $^{207}\text{Pb}/^{235}\text{U}$ | 1 $\sigma$ | $^{206}\text{Pb}/^{238}\text{U}$ | 1 $\sigma$ | $^{207}\text{Pb}/^{235}\text{U}$ | 1 $\sigma$ | $^{206}\text{Pb}/^{238}\text{U}$ | 1 $\sigma$ |      |
| Basalt (04-B03) |                                   |            |                                  |            |                                  |            |                                  |            |                                  |            |      |
| 29a07           | 0.0465                            | 0.0023     | 0.3016                           | 0.0147     | 0.0471                           | 0.0007     | 267.6                            | 11.47      | 296.4                            | 4.31       | 0.07 |
| 29a08           | 0.0522                            | 0.0024     | 0.3279                           | 0.0146     | 0.0455                           | 0.0007     | 287.9                            | 11.17      | 286.9                            | 4.1        | 0.08 |
| 29a16           | 0.0781                            | 0.0022     | 0.4746                           | 0.0131     | 0.0441                           | 0.0006     | 394.3                            | 8.98       | 278.2                            | 3.38       | 0.13 |
| 29b03           | 0.0932                            | 0.0025     | 0.4634                           | 0.012      | 0.0361                           | 0.0005     | 386.6                            | 8.31       | 228.5                            | 2.78       | 0.14 |
| 29b05           | 0.0667                            | 0.0057     | 0.3835                           | 0.0319     | 0.0417                           | 0.001      | 329.6                            | 23.44      | 263.3                            | 6.25       | 0.03 |
| 29b06           | 0.0508                            | 0.0024     | 0.3086                           | 0.0145     | 0.0441                           | 0.0006     | 273.1                            | 11.25      | 278.3                            | 3.94       | 0.08 |
| 29b09           | 0.073                             | 0.0042     | 0.4311                           | 0.024      | 0.0428                           | 0.0008     | 363.9                            | 17.01      | 270.2                            | 4.85       | 0.05 |
| 29b10           | 0.0479                            | 0.0048     | 0.265                            | 0.0261     | 0.0401                           | 0.001      | 238.7                            | 20.91      | 253.4                            | 5.96       | 0.03 |
| 29b11           | 0.0724                            | 0.0057     | 0.3825                           | 0.0289     | 0.0383                           | 0.0009     | 328.8                            | 21.23      | 242.3                            | 5.55       | 0.03 |
| Basalt (04-B04) |                                   |            |                                  |            |                                  |            |                                  |            |                                  |            |      |
| 29a331          | 0.0531                            | 0.0032     | 0.3105                           | 0.0179     | 0.0424                           | 0.0008     | 274.6                            | 13.84      | 267.8                            | 4.67       | 0.05 |
| 29a332          | 0.0469                            | 0.0017     | 0.3105                           | 0.0108     | 0.0481                           | 0.0006     | 274.6                            | 8.33       | 302.6                            | 3.73       | 0.10 |
| 29a339          | 0.0506                            | 0.0026     | 0.3469                           | 0.0175     | 0.0499                           | 0.0008     | 302.4                            | 13.19      | 314.1                            | 4.66       | 0.06 |
| 29a340          | 0.0533                            | 0.0011     | 0.3286                           | 0.0063     | 0.0449                           | 0.0005     | 288.5                            | 4.8        | 283.4                            | 2.9        | 0.22 |
| 29a341          | 0.0548                            | 0.0021     | 0.3756                           | 0.0141     | 0.05                             | 0.0007     | 323.8                            | 10.43      | 314.3                            | 4.07       | 0.09 |
| 29a345          | 0.0488                            | 0.002      | 0.2982                           | 0.0121     | 0.0446                           | 0.0006     | 265                              | 9.47       | 281.1                            | 3.62       | 0.09 |
| 29a346          | 0.0536                            | 0.0046     | 0.3533                           | 0.0298     | 0.048                            | 0.0011     | 307.2                            | 22.39      | 302.5                            | 6.53       | 0.04 |
| 29a347          | 0.0515                            | 0.0026     | 0.3245                           | 0.016      | 0.046                            | 0.0007     | 285.4                            | 12.28      | 289.7                            | 4.11       | 0.06 |
| 29a349          | 0.0531                            | 0.0017     | 0.3314                           | 0.0101     | 0.0454                           | 0.0005     | 290.6                            | 7.67       | 286.5                            | 3.32       | 0.12 |
| 29a351          | 0.0559                            | 0.0043     | 0.349                            | 0.0261     | 0.0455                           | 0.0009     | 304                              | 19.66      | 286.6                            | 5.5        | 0.04 |
| Gabbro (04-B07) |                                   |            |                                  |            |                                  |            |                                  |            |                                  |            |      |
| 29a354          | 0.0611                            | 0.0017     | 0.3086                           | 0.0082     | 0.0366                           | 0.0004     | 273.1                            | 6.32       | 232                              | 2.63       | 0.13 |
| 29a355          | 0.066                             | 0.0032     | 0.3322                           | 0.0154     | 0.0365                           | 0.0006     | 291.2                            | 11.75      | 231.2                            | 3.54       | 0.07 |
| 29a356          | 0.051                             | 0.0016     | 0.3302                           | 0.01       | 0.047                            | 0.0006     | 289.7                            | 7.63       | 296                              | 3.41       | 0.11 |
| 29a360          | 0.0525                            | 0.0018     | 0.3235                           | 0.0109     | 0.0447                           | 0.0006     | 284.6                            | 8.35       | 282.1                            | 3.39       | 0.11 |
| 29a361          | 0.0514                            | 0.0013     | 0.312                            | 0.0075     | 0.044                            | 0.0005     | 275.7                            | 5.78       | 277.7                            | 2.95       | 0.17 |
| 29a362          | 0.0544                            | 0.0013     | 0.3215                           | 0.0077     | 0.0429                           | 0.0005     | 283                              | 5.9        | 270.6                            | 2.89       | 0.16 |
| 29a363          | 0.0617                            | 0.0022     | 0.3414                           | 0.0117     | 0.0401                           | 0.0005     | 298.2                            | 8.83       | 253.7                            | 3.16       | 0.10 |

|                  |        |        |        |        |        |        |       |       |       |      |      |
|------------------|--------|--------|--------|--------|--------|--------|-------|-------|-------|------|------|
| 29a364           | 0.053  | 0.0024 | 0.3123 | 0.0138 | 0.0428 | 0.0006 | 276   | 10.67 | 270   | 3.7  | 0.07 |
| Diabase (04-B30) |        |        |        |        |        |        |       |       |       |      |      |
| 29a102           | 0.0477 | 0.0033 | 0.3019 | 0.0205 | 0.0459 | 0.0008 | 267.9 | 15.98 | 289.6 | 4.97 | 0.04 |
| 29a103           | 0.0535 | 0.004  | 0.3294 | 0.0241 | 0.0447 | 0.0009 | 289.1 | 18.43 | 281.9 | 5.34 | 0.01 |
| 29a104           | 0.0583 | 0.0038 | 0.3597 | 0.0229 | 0.0448 | 0.0008 | 312   | 17.09 | 282.2 | 4.95 | 0.04 |
| 29a105           | 0.0494 | 0.0026 | 0.2977 | 0.0155 | 0.0437 | 0.0007 | 264.6 | 12.13 | 275.7 | 4.04 | 0.06 |
| 29a106           | 0.0704 | 0.0037 | 0.4633 | 0.0237 | 0.0477 | 0.0008 | 385.9 | 16.42 | 300.2 | 4.84 | 0.05 |
| 29a110           | 0.0532 | 0.0029 | 0.3189 | 0.0172 | 0.0435 | 0.0007 | 281.1 | 13.2  | 274.3 | 4.17 | 0.06 |
| 29a112           | 0.0525 | 0.0029 | 0.3125 | 0.017  | 0.0432 | 0.0007 | 276.1 | 13.14 | 272.7 | 4.2  | 0.06 |
| 29a114           | 0.0569 | 0.0027 | 0.3561 | 0.0164 | 0.0454 | 0.0007 | 309.3 | 12.24 | 286.1 | 4.02 | 0.07 |
| 29a115           | 0.0512 | 0.0018 | 0.3194 | 0.0109 | 0.0453 | 0.0006 | 281.4 | 8.35  | 285.3 | 3.39 | 0.10 |
| 29a116           | 0.0539 | 0.0024 | 0.3301 | 0.0143 | 0.0444 | 0.0006 | 289.6 | 10.9  | 280.1 | 3.78 | 0.08 |
| 29a117           | 0.0506 | 0.002  | 0.3228 | 0.0125 | 0.0463 | 0.0006 | 284.1 | 9.58  | 291.9 | 3.67 | 0.08 |
| 29a118           | 0.0549 | 0.0035 | 0.3371 | 0.0212 | 0.0445 | 0.0008 | 294.9 | 16.07 | 280.9 | 4.67 | 0.05 |
| 29a120           | 0.0529 | 0.0028 | 0.3342 | 0.0175 | 0.0459 | 0.0007 | 292.8 | 13.33 | 289   | 4.37 | 0.06 |
| 29a121           | 0.0497 | 0.0029 | 0.3    | 0.0168 | 0.0438 | 0.0007 | 266.4 | 13.1  | 276.2 | 4.23 | 0.05 |
| 29a122           | 0.045  | 0.0024 | 0.2935 | 0.0154 | 0.0473 | 0.0007 | 261.3 | 12.05 | 297.8 | 4.22 | 0.06 |
| 29a123           | 0.0534 | 0.0023 | 0.3431 | 0.0145 | 0.0466 | 0.0006 | 299.5 | 10.98 | 293.6 | 3.91 | 0.08 |
| 29a124           | 0.0473 | 0.0026 | 0.2944 | 0.016  | 0.0451 | 0.0007 | 262   | 12.51 | 284.5 | 4.23 | 0.06 |
| 29a126           | 0.0546 | 0.0026 | 0.327  | 0.0151 | 0.0435 | 0.0006 | 287.3 | 11.52 | 274.2 | 3.87 | 0.07 |
| 29a127           | 0.0496 | 0.0027 | 0.3134 | 0.0168 | 0.0458 | 0.0007 | 276.8 | 12.97 | 288.8 | 4.35 | 0.06 |
| 29a128           | 0.0517 | 0.0031 | 0.3202 | 0.0189 | 0.0449 | 0.0007 | 282   | 14.52 | 283.2 | 4.57 | 0.04 |
| 29a129           | 0.0511 | 0.003  | 0.3136 | 0.0179 | 0.0446 | 0.0007 | 277   | 13.84 | 281.1 | 4.44 | 0.05 |
| 29a130           | 0.0507 | 0.0021 | 0.3177 | 0.0128 | 0.0455 | 0.0006 | 280.2 | 9.89  | 286.5 | 3.7  | 0.08 |
| 29a132           | 0.0499 | 0.0024 | 0.3183 | 0.015  | 0.0463 | 0.0007 | 280.6 | 11.54 | 291.8 | 4.05 | 0.06 |
| 29a133           | 0.0477 | 0.0023 | 0.3001 | 0.0141 | 0.0456 | 0.0006 | 266.5 | 11.03 | 287.5 | 3.92 | 0.07 |
| 29a134           | 0.0497 | 0.0022 | 0.2967 | 0.0127 | 0.0433 | 0.0006 | 263.8 | 9.9   | 273.5 | 3.6  | 0.08 |
| 29a135           | 0.0522 | 0.0033 | 0.3083 | 0.0193 | 0.0429 | 0.0008 | 272.9 | 14.94 | 270.5 | 4.61 | 0.05 |
| 29a136           | 0.0463 | 0.0023 | 0.28   | 0.0135 | 0.0439 | 0.0006 | 250.6 | 10.68 | 276.7 | 3.83 | 0.07 |
| 29a138           | 0.0492 | 0.0031 | 0.3103 | 0.019  | 0.0457 | 0.0008 | 274.4 | 14.75 | 288.2 | 4.69 | 0.05 |
| 29a139           | 0.0478 | 0.0027 | 0.2887 | 0.0159 | 0.0439 | 0.0007 | 257.5 | 12.53 | 276.6 | 4.17 | 0.06 |

|                  |        |        |        |        |        |        |       |       |       |      |      |
|------------------|--------|--------|--------|--------|--------|--------|-------|-------|-------|------|------|
| 29a140           | 0.0544 | 0.0029 | 0.3389 | 0.0178 | 0.0452 | 0.0007 | 296.4 | 13.49 | 284.9 | 4.37 | 0.06 |
| 29a141           | 0.0538 | 0.0027 | 0.3168 | 0.0152 | 0.0427 | 0.0006 | 279.4 | 11.72 | 269.7 | 3.87 | 0.06 |
| Syenite (04-B32) |        |        |        |        |        |        |       |       |       |      |      |
| 29a260           | 0.0527 | 0.0033 | 0.3447 | 0.0212 | 0.0475 | 0.0008 | 300.7 | 16.03 | 298.9 | 4.95 | 0.06 |
| 29a261           | 0.0485 | 0.0024 | 0.3128 | 0.0153 | 0.0468 | 0.0007 | 276.3 | 11.8  | 295   | 4.25 | 0.07 |
| 29a262           | 0.0501 | 0.0025 | 0.3112 | 0.0154 | 0.0451 | 0.0007 | 275.1 | 11.93 | 284.3 | 4.15 | 0.07 |
| 29a263           | 0.0522 | 0.0031 | 0.3374 | 0.0195 | 0.0469 | 0.0008 | 295.2 | 14.81 | 295.5 | 4.74 | 0.06 |
| 29a264           | 0.0483 | 0.0027 | 0.3078 | 0.017  | 0.0462 | 0.0007 | 272.5 | 13.91 | 291.4 | 4.52 | 0.06 |
| 29a268           | 0.0481 | 0.0025 | 0.3074 | 0.0153 | 0.0465 | 0.0007 | 272.1 | 11.91 | 292.7 | 4.27 | 0.07 |
| 29a269           | 0.0493 | 0.0034 | 0.3245 | 0.0216 | 0.0478 | 0.0008 | 285.3 | 16.56 | 301.2 | 5.04 | 0.04 |
| 29a270           | 0.05   | 0.0024 | 0.3039 | 0.0139 | 0.0441 | 0.0006 | 269.4 | 10.86 | 278.3 | 3.89 | 0.08 |
| 29a272           | 0.0499 | 0.0026 | 0.3161 | 0.016  | 0.046  | 0.0007 | 278.9 | 12.33 | 290   | 4.28 | 0.07 |
| 29a273           | 0.0499 | 0.0033 | 0.3191 | 0.0204 | 0.0465 | 0.0008 | 281.2 | 15.71 | 292.9 | 4.91 | 0.05 |
| 29a274           | 0.0504 | 0.0042 | 0.3269 | 0.0266 | 0.0471 | 0.001  | 287.2 | 20.34 | 296.7 | 5.98 | 0.04 |
| 29a275           | 0.051  | 0.003  | 0.3047 | 0.0173 | 0.0434 | 0.0007 | 270.1 | 13.48 | 274   | 4.43 | 0.06 |
| 29a276           | 0.0508 | 0.0024 | 0.3149 | 0.0147 | 0.0451 | 0.0007 | 278   | 11.36 | 284.1 | 4.03 | 0.07 |
| 29a279           | 0.0534 | 0.0022 | 0.317  | 0.0129 | 0.0431 | 0.0006 | 279.6 | 9.93  | 272.3 | 3.67 | 0.08 |
| 29a280           | 0.0499 | 0.0033 | 0.2936 | 0.0189 | 0.0427 | 0.0008 | 261.4 | 14.81 | 269.5 | 4.61 | 0.04 |
| 29a282           | 0.0486 | 0.0026 | 0.2973 | 0.0158 | 0.0444 | 0.0007 | 264.2 | 12.36 | 280   | 4.21 | 0.06 |
| 29a283           | 0.0565 | 0.0022 | 0.3519 | 0.0132 | 0.0452 | 0.0006 | 306.1 | 9.9   | 285   | 3.73 | 0.10 |
| 29a286           | 0.0554 | 0.0031 | 0.3375 | 0.0181 | 0.0442 | 0.0007 | 295.3 | 13.71 | 278.8 | 4.39 | 0.05 |
| 29a287           | 0.0492 | 0.0027 | 0.2922 | 0.0158 | 0.0431 | 0.0007 | 260.3 | 12.38 | 272.1 | 4.11 | 0.06 |
| 29a288           | 0.048  | 0.0029 | 0.2978 | 0.0174 | 0.045  | 0.0007 | 264.7 | 13.6  | 283.7 | 4.49 | 0.05 |
| 29a289           | 0.0507 | 0.0035 | 0.3257 | 0.0218 | 0.0466 | 0.0009 | 286.3 | 16.71 | 293.8 | 5.33 | 0.05 |
| 29a291           | 0.0491 | 0.003  | 0.3027 | 0.0183 | 0.0447 | 0.0007 | 268.5 | 14.28 | 281.9 | 4.58 | 0.05 |
| 29a292           | 0.0482 | 0.0027 | 0.3006 | 0.0165 | 0.0452 | 0.0007 | 266.9 | 12.89 | 285.2 | 4.37 | 0.06 |
| 29a293           | 0.0572 | 0.0034 | 0.3547 | 0.0207 | 0.045  | 0.0008 | 308.2 | 15.5  | 283.4 | 4.79 | 0.05 |
| 29a298           | 0.0505 | 0.0017 | 0.2828 | 0.0092 | 0.0406 | 0.0005 | 252.9 | 7.27  | 256.5 | 3.09 | 0.11 |
| 29a299           | 0.0526 | 0.0029 | 0.3033 | 0.0163 | 0.0418 | 0.0007 | 268.9 | 12.67 | 264   | 4.08 | 0.06 |
| 29a300           | 0.0485 | 0.0025 | 0.2888 | 0.0144 | 0.0431 | 0.0006 | 257.6 | 11.33 | 272.2 | 3.91 | 0.07 |

Gabbro (04-B09)

|       |        |        |        |        |        |        |       |       |       |      |      |
|-------|--------|--------|--------|--------|--------|--------|-------|-------|-------|------|------|
| 29a78 | 0.0453 | 0.0032 | 0.2835 | 0.0193 | 0.0454 | 0.0008 | 253.4 | 15.28 | 286.2 | 4.82 | 0.04 |
| 29a79 | 0.0567 | 0.0039 | 0.3373 | 0.0225 | 0.0432 | 0.0008 | 295.2 | 17.07 | 272.4 | 5.06 | 0.04 |
| 29a81 | 0.0523 | 0.0029 | 0.262  | 0.0139 | 0.0364 | 0.0006 | 236.2 | 11.22 | 230.2 | 3.53 | 0.05 |
| 29a82 | 0.0529 | 0.0035 | 0.3538 | 0.023  | 0.0486 | 0.0009 | 307.6 | 17.25 | 305.6 | 5.43 | 0.04 |
| 29a84 | 0.052  | 0.0025 | 0.3149 | 0.0148 | 0.044  | 0.0006 | 277.9 | 11.45 | 277.4 | 3.91 | 0.07 |
| 29a85 | 0.052  | 0.0038 | 0.3036 | 0.0217 | 0.0424 | 0.0008 | 269.2 | 16.9  | 267.7 | 5.03 | 0.03 |
| 29a86 | 0.0541 | 0.0069 | 0.3245 | 0.0402 | 0.0435 | 0.0013 | 285.4 | 30.84 | 274.6 | 8.27 | 0.02 |
| 29a87 | 0.0907 | 0.0043 | 0.6093 | 0.0279 | 0.0488 | 0.0008 | 483.1 | 17.63 | 307   | 5.07 | 0.06 |
| 29a88 | 0.0509 | 0.0038 | 0.2766 | 0.02   | 0.0395 | 0.0008 | 248   | 15.89 | 249.6 | 4.69 | 0.03 |
| 29a90 | 0.0524 | 0.0022 | 0.3206 | 0.0132 | 0.0444 | 0.0006 | 282.4 | 10.18 | 280   | 3.65 | 0.08 |
| 29a94 | 0.0538 | 0.0071 | 0.3082 | 0.0395 | 0.0416 | 0.0013 | 272.8 | 30.64 | 262.5 | 8.21 | 0.02 |
| 29a98 | 0.0669 | 0.0063 | 0.3429 | 0.031  | 0.0372 | 0.001  | 299.4 | 23.46 | 235.6 | 5.99 | 0.03 |
| 29a99 | 0.0518 | 0.0024 | 0.3007 | 0.0134 | 0.0422 | 0.0006 | 267   | 10.44 | 266.2 | 3.61 | 0.06 |

---

Dacite (Shun 1)

|        |        |        |        |        |        |        |       |       |       |      |      |
|--------|--------|--------|--------|--------|--------|--------|-------|-------|-------|------|------|
| 29a213 | 0.0522 | 0.0025 | 0.3484 | 0.0163 | 0.0484 | 0.0007 | 303.5 | 12.24 | 304.7 | 4.35 | 0.08 |
| 29a214 | 0.0525 | 0.0025 | 0.3229 | 0.0149 | 0.0446 | 0.0007 | 284.1 | 11.4  | 281.3 | 3.98 | 0.08 |
| 29a215 | 0.0519 | 0.0017 | 0.3035 | 0.0096 | 0.0424 | 0.0005 | 269.1 | 7.51  | 267.4 | 3.2  | 0.13 |
| 29a216 | 0.0521 | 0.0011 | 0.3547 | 0.007  | 0.0493 | 0.0005 | 308.3 | 5.22  | 310.3 | 3.24 | 0.23 |
| 29a217 | 0.0538 | 0.0018 | 0.3384 | 0.0108 | 0.0456 | 0.0006 | 295.9 | 8.21  | 287.2 | 3.47 | 0.13 |
| 29a219 | 0.0524 | 0.0021 | 0.3353 | 0.0129 | 0.0464 | 0.0006 | 293.6 | 9.79  | 292.5 | 3.81 | 0.10 |
| 29a220 | 0.0509 | 0.0025 | 0.3162 | 0.0154 | 0.0451 | 0.0007 | 278.9 | 11.89 | 284.1 | 4.19 | 0.08 |
| 29a221 | 0.053  | 0.0038 | 0.3473 | 0.024  | 0.0475 | 0.0009 | 302.7 | 18.08 | 299.3 | 5.6  | 0.05 |
| 29a222 | 0.0531 | 0.0014 | 0.3322 | 0.0084 | 0.0454 | 0.0005 | 291.2 | 6.43  | 286.2 | 3.19 | 0.17 |
| 29a223 | 0.0508 | 0.0042 | 0.3138 | 0.0252 | 0.0448 | 0.0009 | 277.1 | 19.49 | 282.6 | 5.77 | 0.03 |
| 29a225 | 0.0498 | 0.0035 | 0.3067 | 0.021  | 0.0446 | 0.0008 | 271.7 | 16.28 | 281.6 | 5.1  | 0.04 |
| 29a226 | 0.0513 | 0.0038 | 0.3172 | 0.0232 | 0.0448 | 0.0009 | 279.7 | 17.87 | 282.8 | 5.39 | 0.04 |
| 29a227 | 0.0496 | 0.0007 | 0.2942 | 0.0042 | 0.043  | 0.0004 | 261.9 | 3.32  | 271.4 | 2.71 | 0.32 |
| 29a228 | 0.0506 | 0.0021 | 0.3046 | 0.0125 | 0.0437 | 6E-05  | 270   | 9.72  | 275.6 | 3.7  | 0.09 |
| 29a229 | 0.0517 | 0.0032 | 0.3346 | 0.0203 | 0.047  | 0.0008 | 293.1 | 15.45 | 295.7 | 5    | 0.05 |
| 29a231 | 0.0532 | 0.0033 | 0.3257 | 0.0199 | 0.0444 | 0.0008 | 286.3 | 15.22 | 280.1 | 4.76 | 0.05 |
| 29a232 | 0.054  | 0.0028 | 0.3305 | 0.0168 | 0.0444 | 0.0007 | 289.9 | 12.81 | 280.1 | 4.31 | 0.06 |

|        |        |        |        |        |        |        |       |       |       |      |      |
|--------|--------|--------|--------|--------|--------|--------|-------|-------|-------|------|------|
| 29a233 | 0.0582 | 0.0021 | 0.3554 | 0.0124 | 0.0443 | 0.0006 | 308.8 | 9.26  | 279.6 | 3.59 | 0.11 |
| 29a234 | 0.049  | 0.0021 | 0.3072 | 0.0125 | 0.0457 | 0.0006 | 272.9 | 9.72  | 286.7 | 3.83 | 0.09 |
| 29a235 | 0.0521 | 0.002  | 0.3172 | 0.012  | 0.0442 | 0.0006 | 279.7 | 9.23  | 278.8 | 3.64 | 0.10 |
| 29a238 | 0.0539 | 0.001  | 0.3269 | 0.006  | 0.044  | 0.0005 | 287.2 | 4.62  | 277.6 | 2.89 | 0.25 |
| 29a239 | 0.0485 | 0.0017 | 0.3189 | 0.0112 | 0.0478 | 0.0006 | 281.8 | 8.59  | 300.8 | 3.73 | 0.11 |
| 29a241 | 0.0541 | 0.003  | 0.3265 | 0.0177 | 0.0433 | 0.0007 | 286.9 | 13.58 | 276.5 | 4.53 | 0.06 |
| 29a243 | 0.0546 | 0.0023 | 0.3631 | 0.015  | 0.0483 | 0.0007 | 314.6 | 11.19 | 303.8 | 4.21 | 0.09 |
| 29a246 | 0.0504 | 0.0026 | 0.3286 | 0.0162 | 0.0473 | 0.0007 | 288.5 | 12.38 | 297.8 | 4.43 | 0.07 |
| 29a247 | 0.0554 | 0.0044 | 0.3527 | 0.0272 | 0.0463 | 0.001  | 306.8 | 20.4  | 291.5 | 6.24 | 0.04 |
| 29a252 | 0.0517 | 0.0031 | 0.3256 | 0.0191 | 0.0457 | 8E-05  | 286.2 | 14.64 | 288.1 | 4.95 | 0.06 |

Granodiorite (04-B11)

|       |        |        |        |        |        |        |       |       |       |      |      |
|-------|--------|--------|--------|--------|--------|--------|-------|-------|-------|------|------|
| 29a21 | 0.0525 | 0.0033 | 0.3366 | 0.0204 | 0.0465 | 0.0008 | 294.6 | 15.53 | 293.4 | 4.89 | 0.05 |
| 29a22 | 0.0519 | 0.0039 | 0.3333 | 0.0244 | 0.0466 | 0.0009 | 292.1 | 18.54 | 293.5 | 5.6  | 0.04 |
| 29a23 | 0.0464 | 0.0026 | 0.2993 | 0.0163 | 0.0468 | 0.0007 | 265.6 | 12.72 | 294.7 | 4.41 | 0.06 |
| 29a24 | 0.05   | 0.0022 | 0.3225 | 0.014  | 0.0468 | 0.0007 | 283.8 | 10.71 | 294.9 | 3.99 | 0.09 |
| 29a25 | 0.0485 | 0.0026 | 0.3086 | 0.0161 | 0.0461 | 0.0007 | 273.1 | 12.52 | 290.6 | 4.29 | 0.06 |
| 29a27 | 0.052  | 0.0024 | 0.3352 | 0.0151 | 0.0468 | 0.0007 | 293.5 | 11.51 | 294.7 | 4.12 | 0.07 |
| 29a28 | 0.0671 | 0.0026 | 0.3314 | 0.0159 | 0.0466 | 0.0006 | 364.1 | 11.26 | 293.9 | 3.93 | 0.79 |
| 29a29 | 0.0521 | 0.0034 | 0.3333 | 0.0215 | 0.0464 | 0.0008 | 292.1 | 16.38 | 292.4 | 5.1  | 0.06 |
| 29a30 | 0.0495 | 0.0031 | 0.3095 | 0.0187 | 0.0453 | 0.0008 | 273.8 | 14.5  | 285.9 | 4.65 | 0.05 |
| 29a31 | 0.0506 | 0.0012 | 0.3192 | 0.0075 | 0.0457 | 0.0005 | 281.3 | 5.76  | 288.3 | 3.11 | 0.17 |
| 29a33 | 0.0511 | 0.0016 | 0.3304 | 0.0099 | 0.0469 | 0.0006 | 289.8 | 7.56  | 295.7 | 3.43 | 0.13 |
| 29a34 | 0.0507 | 0.0018 | 0.343  | 0.0116 | 0.0491 | 0.0006 | 299.4 | 8.73  | 309.1 | 3.74 | 0.11 |
| 29a35 | 0.0534 | 0.0018 | 0.3382 | 0.0111 | 0.046  | 0.0006 | 295.8 | 8.39  | 289.7 | 3.5  | 0.12 |
| 29a36 | 0.0512 | 0.0023 | 0.321  | 0.0139 | 0.0455 | 0.0006 | 282.7 | 10.71 | 287.3 | 3.92 | 0.08 |
| 29a37 | 0.0513 | 0.0015 | 0.34   | 0.0094 | 0.0481 | 0.0006 | 297.2 | 7.1   | 302.9 | 3.42 | 0.15 |
| 29a39 | 0.0517 | 0.0014 | 0.3362 | 0.0091 | 0.0472 | 0.0005 | 294.3 | 6.93  | 297.4 | 3.35 | 0.14 |
| 29a40 | 0.0566 | 0.0035 | 0.3569 | 0.0218 | 0.0458 | 0.0008 | 309.9 | 16.31 | 288.6 | 4.97 | 0.06 |
| 29a41 | 0.0491 | 0.0016 | 0.3169 | 0.01   | 0.0469 | 0.0006 | 279.5 | 7.7   | 295.2 | 3.46 | 0.13 |
| 29a42 | 0.0512 | 0.0015 | 0.3291 | 0.0091 | 0.0466 | 0.0005 | 288.9 | 6.97  | 293.8 | 3.33 | 0.16 |
| 29a43 | 0.0501 | 0.0015 | 0.3161 | 0.0092 | 0.0457 | 0.0005 | 278.9 | 7.13  | 288.3 | 3.32 | 0.14 |



|       |        |        |        |        |        |        |       |       |       |      |      |
|-------|--------|--------|--------|--------|--------|--------|-------|-------|-------|------|------|
| 29a45 | 0.0505 | 0.0017 | 0.329  | 0.0111 | 0.0472 | 0.0006 | 288.8 | 8.49  | 297.6 | 3.6  | 0.13 |
| 29a46 | 0.0517 | 0.0016 | 0.3362 | 0.0101 | 0.0472 | 0.0006 | 294.3 | 7.66  | 297.1 | 3.46 | 0.14 |
| 29a47 | 0.0496 | 0.0018 | 0.3228 | 0.0117 | 0.0472 | 0.0006 | 284   | 8.99  | 297.3 | 3.69 | 0.11 |
| 29a48 | 0.0535 | 0.0022 | 0.3473 | 0.0141 | 0.0471 | 0.0006 | 302.7 | 10.59 | 296.5 | 3.94 | 0.09 |
| 29a49 | 0.0516 | 0.0022 | 0.3291 | 0.0134 | 0.0463 | 0.0006 | 288.8 | 10.25 | 291.8 | 3.87 | 0.10 |
| 29a51 | 0.0497 | 0.0032 | 0.323  | 0.0205 | 0.0472 | 0.0008 | 284.2 | 15.7  | 297.2 | 4.88 | 0.05 |
| 29a53 | 0.0556 | 0.0024 | 0.366  | 0.0156 | 0.0478 | 0.0007 | 316.7 | 11.57 | 300.9 | 4.13 | 0.09 |
| 29a54 | 0.0511 | 0.0026 | 0.345  | 0.0169 | 0.049  | 0.0007 | 300.9 | 12.74 | 308.3 | 4.43 | 0.08 |
| 29a55 | 0.0546 | 0.0024 | 0.3423 | 0.0148 | 0.0455 | 0.0006 | 298.9 | 11.22 | 286.7 | 3.88 | 0.09 |
| 29a57 | 0.0519 | 0.0016 | 0.3422 | 0.0106 | 0.0478 | 0.0006 | 298.9 | 8.01  | 301.2 | 3.56 | 0.14 |
| 29a58 | 0.0557 | 0.0035 | 0.3514 | 0.0213 | 0.0458 | 0.0008 | 305.8 | 15.97 | 288.7 | 4.83 | 0.05 |
| 29a59 | 0.0519 | 0.0021 | 0.3377 | 0.0133 | 0.0472 | 0.0006 | 295.4 | 10.1  | 297.5 | 3.87 | 0.10 |
| 29a60 | 0.055  | 0.0022 | 0.3641 | 0.0142 | 0.048  | 0.0007 | 315.3 | 10.58 | 302.5 | 3.97 | 0.10 |
| 29a61 | 0.0541 | 0.0019 | 0.3572 | 0.0122 | 0.0479 | 0.0006 | 310.1 | 9.13  | 301.8 | 3.73 | 0.12 |
| 29a63 | 0.0532 | 0.0021 | 0.3382 | 0.0129 | 0.0461 | 0.0006 | 295.8 | 9.76  | 290.6 | 3.74 | 0.11 |
| 29a64 | 0.0548 | 0.0024 | 0.3596 | 0.0152 | 0.0476 | 0.0007 | 311.9 | 11.31 | 299.8 | 4.08 | 0.10 |
| 29a65 | 0.0534 | 0.0026 | 0.3533 | 0.0166 | 0.048  | 0.0007 | 307.2 | 12.46 | 302   | 4.31 | 0.08 |
| 29a66 | 0.0565 | 0.0031 | 0.3686 | 0.0198 | 0.0473 | 0.0008 | 318.6 | 14.71 | 297.8 | 4.65 | 0.07 |
| 29a71 | 0.0538 | 0.0027 | 0.3565 | 0.0173 | 0.048  | 0.0007 | 309.6 | 12.94 | 302.4 | 4.39 | 0.07 |
| 29a72 | 0.0534 | 0.0025 | 0.3563 | 0.0164 | 0.0483 | 0.0007 | 309.5 | 12.31 | 304.3 | 4.29 | 0.09 |
| 29a73 | 0.0551 | 0.0023 | 0.3558 | 0.0148 | 0.0468 | 0.0007 | 309.1 | 11.06 | 294.7 | 3.99 | 0.10 |

---

Zhang *et al.* (2009)

| Spot        | <sup>206</sup> Pb <sub>c</sub> % | Th<br>ppm | U<br>ppm | Th/U  | Isotope ratio                        |     |                                     |     |                                     |     | Age (Ma)                            |    | RHO  |
|-------------|----------------------------------|-----------|----------|-------|--------------------------------------|-----|-------------------------------------|-----|-------------------------------------|-----|-------------------------------------|----|------|
|             |                                  |           |          |       | <sup>207</sup> Pb/ <sup>206</sup> Pb | 1σ  | <sup>207</sup> Pb/ <sup>235</sup> U | 1σ  | <sup>206</sup> Pb/ <sup>238</sup> U | 1σ  | <sup>206</sup> Pb/ <sup>238</sup> U | 1σ |      |
| Basalt Yg01 |                                  |           |          |       |                                      |     |                                     |     |                                     |     |                                     |    |      |
| yg01-5.1    | 0.248                            | 240       | 344      | 0.719 | 0.0504                               | 1.8 | 0.312                               | 1.9 | 0.0449                              | 0.8 | 283                                 | 2  | 0.33 |
| yg01-1.1    | 0                                | 51        | 74       | 0.705 | 0.0545                               | 2.9 | 0.338                               | 3.4 | 0.045                               | 1.8 | 284                                 | 5  | 0.52 |
| yg01-4.1    | 0.372                            | 60        | 124      | 0.503 | 0.05                                 | 2.9 | 0.31                                | 3   | 0.0451                              | 0.9 | 284                                 | 2  | 0.26 |
| yg01-1.2    | 1.64                             | 16        | 41       | 0.397 | 0.0395                               | 19  | 0.245                               | 19  | 0.0451                              | 1.4 | 284                                 | 4  | 0.04 |
| yg01-7.1    | 0.097                            | 629       | 795      | 0.817 | 0.0509                               | 1   | 0.318                               | 1.3 | 0.0453                              | 0.7 | 286                                 | 2  | 0.65 |
| yg01-12.1   | 0.213                            | 131       | 199      | 0.682 | 0.0507                               | 4.5 | 0.318                               | 4.7 | 0.0455                              | 1   | 287                                 | 3  | 0.30 |
| yg01-13.1   | -0.456                           | 63        | 116      | 0.565 | 0.054                                | 5.6 | 0.342                               | 5.7 | 0.0459                              | 1   | 289                                 | 3  | 0.19 |
| yg01-8.1    | 0                                | 115       | 229      | 0.518 | 0.0519                               | 1.8 | 0.329                               | 2.2 | 0.046                               | 1.2 | 290                                 | 4  | 0.58 |
| yg01-6.1    | 0                                | 26        | 57       | 0.482 | 0.0536                               | 3.2 | 0.34                                | 3.4 | 0.046                               | 1.1 | 290                                 | 3  | 0.34 |
| yg01-10.1   | 0                                | 82        | 184      | 0.459 | 0.0505                               | 1.8 | 0.321                               | 2.1 | 0.0462                              | 1   | 291                                 | 3  | 0.52 |
| yg01-3.2    | 0                                | 79        | 163      | 0.499 | 0.0517                               | 1.8 | 0.33                                | 2.1 | 0.0462                              | 1   | 291                                 | 3  | 0.52 |
| yg01-9.1    | 0.415                            | 56        | 108      | 0.535 | 0.0448                               | 4   | 0.286                               | 4.2 | 0.0463                              | 1.2 | 292                                 | 4  | 0.31 |
| yg01-14.1   | 0.291                            | 117       | 228      | 0.532 | 0.0483                               | 2.6 | 0.309                               | 2.7 | 0.0464                              | 0.9 | 292                                 | 3  | 0.28 |
| yg01-2.1    | 0.055                            | 97        | 209      | 0.482 | 0.0505                               | 2   | 0.323                               | 2.2 | 0.0464                              | 0.9 | 292                                 | 2  | 0.42 |
| yg01-11.1   | -0.008                           | 198       | 352      | 0.58  | 0.0507                               | 3.3 | 0.325                               | 3.4 | 0.0465                              | 0.8 | 293                                 | 2  | 0.24 |
| yg01-3.3    | 0                                | 47        | 120      | 0.409 | 0.0528                               | 2.4 | 0.339                               | 2.6 | 0.0466                              | 0.9 | 294                                 | 3  | 0.39 |
| yg01-15.1   | 0                                | 47        | 76       | 0.642 | 0.054                                | 2.8 | 0.348                               | 2.9 | 0.0467                              | 1   | 295                                 | 3  | 0.27 |
| yg01-3.1    | 0                                | 96        | 191      | 0.52  | 0.051                                | 2   | 0.33                                | 2.3 | 0.047                               | 1.1 | 296                                 | 3  | 0.49 |
| Basalt Yg08 |                                  |           |          |       |                                      |     |                                     |     |                                     |     |                                     |    |      |
| yg08-1.2    | 0.411                            | 58        | 110      | 0.54  | 0.0492                               | 8.7 | 0.302                               | 8.7 | 0.0445                              | 1.1 | 281                                 | 3  | 0.06 |
| yg08-2.1    | 0.185                            | 148       | 221      | 0.694 | 0.0511                               | 4   | 0.318                               | 4.1 | 0.0452                              | 0.8 | 285                                 | 2  | 0.22 |
| yg08-4.1    | 0                                | 136       | 239      | 0.59  | 0.055                                | 1.6 | 0.345                               | 1.8 | 0.0456                              | 0.8 | 287                                 | 2  | 0.46 |
| yg08-4.2    | 0.12                             | 114       | 220      | 0.535 | 0.0522                               | 3.1 | 0.329                               | 3.2 | 0.0457                              | 0.8 | 288                                 | 2  | 0.25 |
| yg08-3.1    | 0.547                            | 63        | 116      | 0.565 | 0.0472                               | 4.4 | 0.298                               | 4.5 | 0.0457                              | 0.9 | 288                                 | 3  | 0.21 |
| yg08-5.1    | 0.077                            | 598       | 1019     | 0.607 | 0.0526                               | 0.9 | 0.337                               | 1.1 | 0.0464                              | 0.7 | 293                                 | 2  | 0.58 |
| yg08-1.1    | 0                                | 86        | 151      | 0.591 | 0.0526                               | 2.1 | 0.338                               | 2.5 | 0.0466                              | 1.3 | 294                                 | 4  | 0.54 |
| yg02-7.1    | 0.34                             | 260       | 384      | 0.699 | 0.057                                | 2.4 | 0.317                               | 2.5 | 0.0453                              | 0.7 | 286                                 | 2  | 0.28 |

|           |       |     |     |       |        |     |       |     |        |      |     |   |      |
|-----------|-------|-----|-----|-------|--------|-----|-------|-----|--------|------|-----|---|------|
| yg02-2.1  | 0.14  | 106 | 581 | 0.189 | 0.0512 | 2.8 | 0.324 | 2.9 | 0.0459 | 0.7  | 289 | 2 | 0.26 |
| yg02-3.1  | -1.24 | 70  | 148 | 0.488 | 0.0625 | 6.8 | 0.402 | 6.9 | 0.0467 | 1    | 294 | 3 | 0.17 |
| yg02-5.1  | 0.48  | 63  | 133 | 0.485 | 0.0533 | 3.6 | 0.343 | 3.7 | 0.0467 | 0.9  | 294 | 3 | 0.23 |
| yg02-1.1  | 0.9   | 61  | 111 | 0.57  | 0.0422 | 6.3 | 0.271 | 6.3 | 0.0467 | 1    | 294 | 3 | 0.08 |
| yg02-9.1  | -0.49 | 74  | 140 | 0.544 | 0.0599 | 3.6 | 0.388 | 3.8 | 0.047  | 0.9  | 296 | 3 | 0.33 |
| yg02-10.1 | 0.63  | 138 | 205 | 0.697 | 0.051  | 3.8 | 0.508 | 3.9 | 0.0721 | 0.8  | 449 | 4 | 0.23 |
| yg02-4.1  | 0.39  | 89  | 55  | 1.687 | 0.0651 | 4.5 | 1.116 | 4.6 | 0.1243 | 1.3  | 755 | 9 | 0.22 |
| yg02-11.1 | 0.46  | 193 | 175 | 1.141 | 0.0628 | 2.3 | 1.181 | 2.4 | 0.1365 | 0.8  | 825 | 7 | 0.29 |
| yg02-6.1  | -0.15 | 136 | 266 | 0.529 | 0.0678 | 1.5 | 1.289 | 1.7 | 0.138  | 0.7  | 833 | 6 | 0.47 |
| yg02-8.1  | 0.08  | 79  | 205 | 0.398 | 0.0701 | 1.1 | 1.505 | 1.3 | 0.1558 | 0.8  | 933 | 7 | 0.54 |
| yg03-1.1  | 2.11  | 36  | 50  | 0.737 | 0.0406 | 18  | 0.263 | 18  | 0.0469 | 1.55 | 296 | 4 | 0.04 |
| yg03-2.1  | -0.11 | 351 | 517 | 0.702 | 0.0539 | 1.4 | 0.352 | 1.6 | 0.0474 | 0.66 | 299 | 2 | 0.49 |
| yg03-3.1  | -0.38 | 72  | 163 | 0.456 | 0.0619 | 2.9 | 0.404 | 3   | 0.0473 | 0.85 | 298 | 2 | 0.26 |
| yg03-4.1  | 0.71  | 38  | 77  | 0.511 | 0.0494 | 5.3 | 0.313 | 5.4 | 0.0459 | 1.11 | 289 | 3 | 0.19 |
| yg03-5.1  | 0.38  | 34  | 88  | 0.399 | 0.0567 | 8.2 | 0.366 | 8.3 | 0.0467 | 1.16 | 294 | 3 | 0.16 |
| xhz-1.1   | 1.09  | 29  | 59  | 0.504 | 0.0471 | 8.6 | 0.287 | 8.7 | 0.0441 | 1.23 | 278 | 3 | 0.15 |
| xhz-2.1   | 0.95  | 50  | 81  | 0.639 | 0.0483 | 7.1 | 0.29  | 7.2 | 0.0436 | 1.11 | 275 | 3 | 0.17 |
| xhz-3.1   | 0.81  | 58  | 146 | 0.409 | 0.0486 | 4.8 | 0.295 | 4.9 | 0.0441 | 0.89 | 278 | 2 | 0.20 |
| xhz-4.1   | 0.42  | 49  | 95  | 0.53  | 0.053  | 6.4 | 0.318 | 6.6 | 0.0435 | 1.31 | 274 | 4 | 0.25 |
| xhz-5.1   | 0     | 49  | 85  | 0.594 | 0.0535 | 3.4 | 0.32  | 3.6 | 0.0434 | 1.04 | 274 | 3 | 0.33 |
| xhz-6.1   | 0.68  | 33  | 75  | 0.459 | 0.05   | 9.4 | 0.31  | 9.8 | 0.045  | 2.84 | 284 | 8 | 0.28 |
| xhz-7.1   | 0.58  | 69  | 113 | 0.635 | 0.0505 | 4.8 | 0.316 | 4.9 | 0.0454 | 0.96 | 287 | 3 | 0.20 |
| xhz-8.1   | 0.93  | 37  | 60  | 0.64  | 0.0453 | 7.8 | 0.283 | 8   | 0.0453 | 1.95 | 286 | 5 | 0.22 |
| xhz-9.1   | 0.19  | 146 | 186 | 0.81  | 0.0524 | 2.5 | 0.323 | 2.6 | 0.0447 | 0.81 | 282 | 2 | 0.28 |
| xhz-10.1  | 0.79  | 37  | 71  | 0.548 | 0.0498 | 13  | 0.301 | 19  | 0.0438 | 2.08 | 277 | 6 | 2.48 |
| xhz-11.1  | 0     | 63  | 104 | 0.626 | 0.0551 | 2.9 | 0.34  | 3   | 0.0448 | 0.97 | 282 | 3 | 0.26 |
| xhz-12.1  | 0.46  | 52  | 79  | 0.677 | 0.0551 | 4.1 | 0.34  | 4.3 | 0.0447 | 1.22 | 282 | 3 | 0.30 |
| xhz-13.1  | 0.34  | 142 | 167 | 0.876 | 0.0522 | 3   | 0.315 | 3.1 | 0.0438 | 0.84 | 276 | 2 | 0.25 |

Diabase

|          |       |     |      |       |        |     |       |     |        |     |      |    |      |
|----------|-------|-----|------|-------|--------|-----|-------|-----|--------|-----|------|----|------|
| yg05-1.1 | -0.32 | 53  | 122  | 0.45  | 0.0676 | 2.6 | 1.181 | 2.8 | 0.1267 | 1   | 769  | 7  | 0.37 |
| yg05-2.1 | 0.377 | 105 | 139  | 0.782 | 0.0472 | 3.5 | 0.276 | 3.7 | 0.0425 | 1   | 268  | 3  | 0.33 |
| yg05-3.1 | 0.208 | 61  | 129  | 0.486 | 0.0777 | 1.2 | 2.058 | 1.5 | 0.1922 | 1   | 1133 | 10 | 0.60 |
| yg05-4.1 | 0.406 | 89  | 160  | 0.573 | 0.0507 | 9.5 | 0.322 | 9.6 | 0.046  | 1.4 | 290  | 4  | 0.14 |
| yg05-5.1 | 0.066 | 616 | 1065 | 0.598 | 0.0523 | 1   | 0.333 | 1.3 | 0.0461 | 0.7 | 291  | 2  | 0.65 |
| yg05-6.1 | 0.032 | 438 | 367  | 1.231 | 0.0645 | 1   | 1.101 | 1.3 | 0.1239 | 0.8 | 753  | 6  | 0.64 |

---

Yu (2009), Yu *et al.* (2011a)

| anal<br>ysis<br>ID | Pb<br>(pp<br>m) | U<br>(pp<br>m) | ato<br>mic<br>Th/<br>U | uncorr'd <sup>207</sup><br>Pb/ <sup>238</sup> Pb<br>ratio | ±     | uncorr'd <sup>207</sup><br>Pb/ <sup>235</sup> U<br>ratio | ±      | uncorr'd <sup>206</sup><br>Pb/ <sup>238</sup> U<br>ratio | ±       | uncorr'd <sup>208</sup><br>Pb/ <sup>232</sup> Th<br>ratio | ±       | %commo<br>n <sup>206</sup> Pb<br>using <sup>208</sup> P<br>b | %commo<br>n <sup>206</sup> Pb<br>using <sup>207</sup> P<br>b | uncorr'd <sup>206</sup><br>Pb/ <sup>238</sup> U<br>age (Ma) | ±    | uncorr'd <sup>207</sup><br>Pb/ <sup>235</sup> U<br>age (Ma) | ±    | uncorr'd <sup>207</sup><br>Pb/ <sup>206</sup> Pb<br>age (Ma) | ±    | uncorr'd <sup>208</sup><br>Pb/ <sup>232</sup> Th<br>age (Ma) | ±    | com<br>ment  | RH<br>O  |
|--------------------|-----------------|----------------|------------------------|-----------------------------------------------------------|-------|----------------------------------------------------------|--------|----------------------------------------------------------|---------|-----------------------------------------------------------|---------|--------------------------------------------------------------|--------------------------------------------------------------|-------------------------------------------------------------|------|-------------------------------------------------------------|------|--------------------------------------------------------------|------|--------------------------------------------------------------|------|--------------|----------|
| YM3<br>0-1-<br>01  | 3.4<br>9        | 64             | 0.9<br>4               | 0.0658                                                    | 0.053 | 0.4318                                                   | 0.0354 | 0.04756                                                  | 0.0084  | 0.01320                                                   | 0.0061  | -2.26                                                        | 1.68                                                         | 299.5                                                       | 7.9  | 364.5                                                       | 26.1 | 801.4                                                        | 47.1 | 265.1                                                        | 12.2 | exclu<br>ded | 0.2<br>2 |
| YM3<br>0-1-<br>02  | 2.3<br>6        | 45             | 0.6<br>7               | 0.0541                                                    | 0.022 | 0.3527                                                   | 0.0149 | 0.04728                                                  | 0.0057  | 0.01509                                                   | 0.0031  | 0.22                                                         | 0.22                                                         | 297.8                                                       | 6.9  | 306.7                                                       | 12.7 | 374.7                                                        | 14.7 | 302.8                                                        | 6.1  |              | 0.2<br>8 |
| YM3<br>0-1-<br>03  | 13.<br>34       | 268            | 0.4<br>2               | 0.0778                                                    | 0.016 | 0.5097                                                   | 0.0109 | 0.04750                                                  | 0.0036  | 0.02186                                                   | 0.0049  | 3.17                                                         | 3.22                                                         | 299.2                                                       | 6.4  | 418.2                                                       | 11.1 | 1142.3                                                       | 26.6 | 437.1                                                        | 9.6  | exclu<br>ded | 0.3<br>6 |
| YM3<br>0-1-<br>04  | 1.6<br>5        | 35             | 0.4<br>9               | 0.0624                                                    | 0.033 | 0.3796                                                   | 0.0205 | 0.04413                                                  | 0.0057  | 0.01592                                                   | 0.0051  | 1.20                                                         | 1.31                                                         | 278.4                                                       | 6.6  | 326.7                                                       | 16.4 | 687.2                                                        | 29.5 | 319.2                                                        | 9.9  | exclu<br>ded | 0.2<br>4 |
| YM3<br>0-1-<br>05  | 12.<br>43       | 262            | 0.4<br>8               | 0.0768                                                    | 0.014 | 0.4735                                                   | 0.0095 | 0.04471                                                  | 0.0039  | 0.01819                                                   | 0.0045  | 2.14                                                         | 3.14                                                         | 282.0                                                       | 6.1  | 393.6                                                       | 10.2 | 1115.9                                                       | 25.4 | 364.3                                                        | 8.8  | exclu<br>ded | 0.4<br>4 |
| YM3<br>0-1-<br>06  | 18.<br>07       | 374            | 0.4<br>1               | 0.0531                                                    | 0.010 | 0.3442                                                   | 0.0073 | 0.04697                                                  | 0.0039  | 0.01566                                                   | 0.0021  | 0.40                                                         | 0.11                                                         | 295.9                                                       | 6.4  | 300.3                                                       | 8.2  | 334.6                                                        | 8.7  | 314.1                                                        | 4.2  | exclu<br>ded | 0.3<br>9 |
| YM3<br>0-1-<br>07  | 1.9<br>6        | 40             | 0.5<br>3               | 0.0567                                                    | 0.035 | 0.3619                                                   | 0.0233 | 0.04631                                                  | 0.0072  | 0.01540                                                   | 0.0051  | 0.58                                                         | 0.56                                                         | 291.8                                                       | 7.3  | 313.6                                                       | 18.5 | 478.7                                                        | 25.7 | 309.0                                                        | 10.2 |              | 0.2<br>4 |
| YM3<br>0-1-<br>08  | 1.9<br>4        | 42             | 0.5<br>6               | 0.0544                                                    | 0.032 | 0.3252                                                   | 0.0193 | 0.04334                                                  | 0.0053  | 0.01340                                                   | 0.0044  | -0.25                                                        | 0.33                                                         | 273.5                                                       | 6.4  | 285.9                                                       | 15.8 | 388.4                                                        | 20.3 | 269.0                                                        | 8.6  |              | 0.2<br>1 |
| YM3<br>0-1-<br>09  | 39.<br>85       | 104            | 0.9<br>4               | 0.1118                                                    | 0.009 | 4.8954                                                   | 0.0436 | 0.31761                                                  | 0.0124  | 0.09356                                                   | 0.0073  | 0.22                                                         | 0.39                                                         | 1778.1                                                      | 36.1 | 1801.5                                                      | 36.8 | 1828.6                                                       | 37.2 | 1807.8                                                       | 12.9 | exclu<br>ded | 0.4<br>4 |
| YM3<br>0-1-<br>10  | 3.1<br>7        | 55             | 0.6<br>0               | 0.0587                                                    | 0.023 | 0.4283                                                   | 0.0174 | 0.05292                                                  | 0.0052  | 0.01785                                                   | 0.0044  | 0.69                                                         | 0.69                                                         | 332.4                                                       | 7.4  | 362.0                                                       | 14.3 | 555.8                                                        | 20.2 | 357.5                                                        | 8.6  | exclu<br>ded | 0.2<br>4 |
| YM3<br>0-1-<br>11  | 6.6<br>9        | 146            | 0.3<br>3               | 0.0522                                                    | 0.012 | 0.3289                                                   | 0.0082 | 0.04572                                                  | 0.0032  | 0.01458                                                   | 0.0030  | 0.09                                                         | 0.01                                                         | 288.2                                                       | 6.1  | 288.7                                                       | 8.5  | 292.4                                                        | 8.4  | 292.5                                                        | 6.0  |              | 0.2<br>8 |
| YM3<br>0-1-<br>12  | 2.3<br>2        | 37             | 1.7<br>8               | 0.0526                                                    | 0.040 | 0.3199                                                   | 0.0247 | 0.04411                                                  | 0.0069  | 0.01410                                                   | 0.0036  | 0.91                                                         | 0.09                                                         | 278.3                                                       | 7.0  | 281.9                                                       | 19.8 | 311.0                                                        | 21.2 | 282.9                                                        | 7.2  |              | 0.2<br>0 |
| YM3<br>0-1-<br>13  | 3.7<br>3        | 44             | 0.6<br>9               | 0.3777                                                    | 0.106 | 4.0163                                                   | 0.1431 | 0.07711                                                  | 0.0169  | 0.11878                                                   | 0.00493 | 80.11                                                        | 65.58                                                        | 478.9                                                       | 13.9 | 1637.5                                                      | 43.7 | 3822.8                                                       | 81.4 | 2268.5                                                       | 85.3 | exclu<br>ded | 0.6<br>1 |
| YM3<br>0-1-<br>14  | 3.3<br>5        | 63             | 0.7<br>8               | 0.0597                                                    | 0.031 | 0.3878                                                   | 0.0208 | 0.04708                                                  | 0.0060  | 0.01462                                                   | 0.0038  | -0.11                                                        | 0.93                                                         | 296.6                                                       | 7.0  | 332.8                                                       | 16.6 | 594.3                                                        | 26.3 | 293.3                                                        | 7.5  | exclu<br>ded | 0.2<br>4 |
| YM3<br>0-1-<br>15  | 22.<br>34       | 300            | 0.6<br>3               | 0.0570                                                    | 0.016 | 0.5375                                                   | 0.0163 | 0.06840                                                  | 0.0065  | 0.02054                                                   | 0.0039  | -0.42                                                        | 0.20                                                         | 426.5                                                       | 9.4  | 436.8                                                       | 13.9 | 490.9                                                        | 14.9 | 411.0                                                        | 7.6  | exclu<br>ded | 0.3<br>1 |
| YM3<br>0-1-<br>16  | 14.<br>65       | 183            | 0.7<br>8               | 0.0570                                                    | 0.012 | 0.5575                                                   | 0.0125 | 0.07090                                                  | 0.0042  | 0.02142                                                   | 0.0024  | -0.39                                                        | 0.16                                                         | 441.6                                                       | 9.2  | 449.9                                                       | 12.2 | 492.2                                                        | 13.0 | 428.3                                                        | 4.7  | exclu<br>ded | 0.2<br>6 |
| YM3<br>0-1-<br>17  | 2.7<br>6        | 56             | 0.6<br>7               | 0.0541                                                    | 0.026 | 0.3353                                                   | 0.0162 | 0.04498                                                  | 0.0045  | 0.01388                                                   | 0.0033  | -0.17                                                        | 0.26                                                         | 283.7                                                       | 6.3  | 293.6                                                       | 13.7 | 372.9                                                        | 16.6 | 278.6                                                        | 6.5  |              | 0.2<br>1 |
| YM3<br>0-1-<br>18  | 12.<br>20       | 221            | 0.8<br>6               | 0.0543                                                    | 0.013 | 0.3594                                                   | 0.0093 | 0.04800                                                  | 0.0035  | 0.01474                                                   | 0.0020  | -0.34                                                        | 0.24                                                         | 302.2                                                       | 6.4  | 311.7                                                       | 9.3  | 383.3                                                        | 11.0 | 295.7                                                        | 4.0  |              | 0.2<br>8 |
| YM3<br>0-1-<br>19  | 11.<br>27       | 209            | 0.8<br>8               | 0.0534                                                    | 0.012 | 0.3425                                                   | 0.0083 | 0.04652                                                  | 0.0032  | 0.01479                                                   | 0.0013  | 0.22                                                         | 0.15                                                         | 293.1                                                       | 6.2  | 299.1                                                       | 8.7  | 345.4                                                        | 9.7  | 296.8                                                        | 2.5  |              | 0.2<br>8 |
| YM3<br>0-1-<br>20  | 24.<br>20       | 438            | 0.9<br>7               | 0.0570                                                    | 0.012 | 0.3671                                                   | 0.0082 | 0.04670                                                  | 0.0034  | 0.01485                                                   | 0.0017  | 0.24                                                         | 0.59                                                         | 294.2                                                       | 6.3  | 317.5                                                       | 8.8  | 491.8                                                        | 12.8 | 297.9                                                        | 3.3  |              | 0.3<br>3 |
| YM3<br>0-1-<br>21  | 44.<br>86       | 80             | 0.6<br>8               | 0.1712                                                    | 0.013 | 11.3068                                                  | 0.1121 | 0.47893                                                  | 0.00299 | 0.13335                                                   | 0.00139 | -0.02                                                        | 0.69                                                         | 2522.6                                                      | 52.1 | 2548.8                                                      | 51.8 | 2569.7                                                       | 51.9 | 2530.1                                                       | 23.6 | exclu<br>ded | 0.6<br>3 |
| YM3<br>0-1-<br>22  | 3.0<br>5        | 52             | 0.5<br>8               | 0.0572                                                    | 0.029 | 0.4295                                                   | 0.0227 | 0.05442                                                  | 0.0074  | 0.01661                                                   | 0.0040  | -0.21                                                        | 0.48                                                         | 341.6                                                       | 8.2  | 362.8                                                       | 17.7 | 500.2                                                        | 22.5 | 333.0                                                        | 7.8  | exclu<br>ded | 0.2<br>6 |
| YM3<br>0-1-<br>23  | 2.8<br>3        | 51             | 0.6<br>8               | 0.0572                                                    | 0.043 | 0.3982                                                   | 0.0309 | 0.05048                                                  | 0.0090  | 0.01562                                                   | 0.0054  | -0.11                                                        | 0.55                                                         | 317.5                                                       | 8.4  | 340.4                                                       | 23.4 | 499.6                                                        | 31.4 | 313.4                                                        | 10.8 | exclu<br>ded | 0.2<br>3 |

|        |     |     |     |        |     |        |     |         |      |         |      |       |       |       |     |       |     |        |     |       |     |          |     |
|--------|-----|-----|-----|--------|-----|--------|-----|---------|------|---------|------|-------|-------|-------|-----|-------|-----|--------|-----|-------|-----|----------|-----|
| YM3    |     |     |     |        |     |        |     |         |      |         |      |       |       |       |     |       |     |        |     |       |     |          |     |
| 0-1-24 | 2.2 |     | 0.7 |        | 0.0 |        | 0.0 |         | 0.00 |         | 0.00 |       |       |       |     | 16.   |     | 23.    |     |       |     |          | 0.2 |
| YM3    | 4   | 44  | 3   | 0.0565 | 032 | 0.3547 | 208 | 0.04553 | 061  | 0.01395 | 047  | -0.26 | 0.55  | 287.0 | 6.9 | 308.3 | 8   | 472.0  | 6   | 280.1 | 9.2 |          | 0.3 |
| 0-1-25 | 4.3 |     | 0.9 |        | 0.0 |        | 0.0 |         | 0.00 |         | 0.00 |       |       |       |     | 11.   |     | 13.    |     |       |     |          | 0.2 |
| YM3    | 9   | 80  | 5   | 0.0544 | 020 | 0.3497 | 132 | 0.04663 | 052  | 0.01491 | 028  | 0.37  | 0.27  | 293.8 | 6.7 | 304.5 | 6   | 386.8  | 9   | 299.1 | 5.5 |          | 0.9 |
| 0-1-26 | 3.5 |     | 1.2 |        | 0.0 |        | 0.0 |         | 0.00 |         | 0.00 |       |       |       |     | 17.   |     | 25.    |     |       |     |          | 0.2 |
| YM3    | 5   | 56  | 8   | 0.0596 | 031 | 0.4131 | 218 | 0.05026 | 064  | 0.01521 | 024  | -0.70 | 0.85  | 316.1 | 7.5 | 351.1 | 2   | 589.4  | 8   | 305.1 | 4.7 | excluded | 0.4 |
| 0-1-27 | 6.1 |     | 0.6 |        | 0.0 |        | 0.0 |         | 0.00 |         | 0.00 |       |       |       |     | 11.   |     | 15.    |     |       |     |          | 0.3 |
| YM3    | 1   | 107 | 3   | 0.0576 | 016 | 0.4195 | 129 | 0.05285 | 063  | 0.01650 | 036  | -0.08 | 0.55  | 332.0 | 7.7 | 355.7 | 7   | 513.3  | 4   | 330.9 | 7.1 | excluded | 0.9 |
| 0-1-28 | 3.9 |     | 0.7 |        | 0.0 |        | 0.0 |         | 0.00 |         | 0.00 |       |       |       |     | 20.   |     | 38.    |     |       |     |          | 0.3 |
| YM3    | 8   | 74  | 9   | 0.0688 | 040 | 0.4497 | 272 | 0.04740 | 088  | 0.01700 | 084  | 1.99  | 2.06  | 298.5 | 8.1 | 377.1 | 5   | 893.0  | 6   | 340.7 | 16. | excluded | 0.1 |
| 0-1-29 | 2.7 |     | 0.7 |        | 0.0 |        | 0.0 |         | 0.00 |         | 0.00 |       |       |       |     | 16.   |     | 23.    |     |       |     |          | 0.2 |
| YM3    | 9   | 52  | 0   | 0.0583 | 029 | 0.3884 | 202 | 0.04830 | 071  | 0.01638 | 051  | 1.03  | 0.73  | 304.1 | 7.5 | 333.2 | 2   | 541.4  | 6   | 328.3 | 10. |          | 0.8 |
| 0-1-30 | 4.0 |     | 0.6 |        | 0.0 |        | 0.0 |         | 0.00 |         | 0.00 |       |       |       |     | 19.   |     | 47.    |     |       |     |          | 0.3 |
| YM3    | 9   | 71  | 4   | 0.1207 | 036 | 0.8443 | 266 | 0.05075 | 053  | 0.02975 | 053  | 10.27 | 9.07  | 319.1 | 7.2 | 621.5 | 2   | 1966.1 | 1   | 592.5 | 10. | excluded | 0.3 |
| 0-1-31 | 13. |     | 0.7 |        | 0.0 |        | 0.0 |         | 0.00 |         | 0.00 |       |       |       |     | 10.   |     | 14.    |     |       |     |          | 0.4 |
| YM3    | 39  | 273 | 7   | 0.0564 | 017 | 0.3373 | 110 | 0.04336 | 058  | 0.01430 | 030  | 0.66  | 0.58  | 273.6 | 6.6 | 295.1 | 2   | 468.8  | 6   | 287.1 | 5.9 | excluded | 0.1 |
| 0-1-32 | 2.1 |     | 0.5 |        | 0.0 |        | 0.0 |         | 0.00 |         | 0.00 |       |       |       |     | 13.   |     | 16.    |     |       |     |          | 0.2 |
| YM3    | 0   | 45  | 7   | 0.0536 | 026 | 0.3227 | 164 | 0.04368 | 059  | 0.01468 | 039  | 0.67  | 0.22  | 275.6 | 6.6 | 284.0 | 8   | 352.6  | 2   | 294.6 | 7.7 |          | 0.7 |
| 0-1-33 | 7.1 |     | 0.6 |        | 0.0 |        | 0.0 |         | 0.00 |         | 0.00 |       |       |       |     | 14.   |     | 36.    |     |       |     |          | 0.3 |
| YM3    | 5   | 129 | 7   | 0.0940 | 025 | 0.6387 | 176 | 0.04926 | 044  | 0.02321 | 058  | 5.69  | 5.35  | 310.0 | 6.8 | 501.5 | 8   | 1508.9 | 5   | 463.8 | 11. | excluded | 0.2 |
| 0-1-34 | 2.2 |     | 0.6 |        | 0.0 |        | 0.0 |         | 0.00 |         | 0.00 |       |       |       |     | 20.   |     | 28.    |     |       |     |          | 0.2 |
| YM3    | 9   | 45  | 6   | 0.0563 | 040 | 0.3573 | 263 | 0.04605 | 074  | 0.01449 | 038  | 0.06  | 0.51  | 290.2 | 7.4 | 310.2 | 6   | 462.7  | 2   | 290.8 | 7.6 |          | 0.2 |
| 0-1-35 | 1.4 |     | 0.5 |        | 0.0 |        | 0.0 |         | 0.00 |         | 0.00 |       |       |       |     | 17.   |     | 28.    |     |       |     |          | 0.3 |
| YM3    | 8   | 28  | 5   | 0.0618 | 032 | 0.4092 | 221 | 0.04799 | 080  | 0.01927 | 068  | 2.64  | 1.17  | 302.1 | 7.8 | 348.3 | 4   | 668.4  | 5   | 385.7 | 13. | excluded | 0.1 |
| 0-1-36 | 8.1 |     | 0.3 |        | 0.0 |        | 0.0 |         | 0.00 |         | 0.00 |       |       |       |     | 0.08  |     | 0.08   |     |       |     |          | 0.2 |
| YM3    | 2   | 170 | 6   | 0.0508 | 014 | 0.3302 | 095 | 0.04717 | 033  | 0.01500 | 028  | 0.08  | -0.18 | 297.1 | 6.3 | 289.7 | 9.3 | 231.6  | 7.4 | 301.0 | 5.6 |          | 0.4 |
| 0-1-37 | 8.0 |     | 0.7 |        | 0.0 |        | 0.0 |         | 0.00 |         | 0.00 |       |       |       |     | 11.   |     | 15.    |     |       |     |          | 0.2 |
| YM3    | 7   | 152 | 8   | 0.0564 | 018 | 0.3660 | 124 | 0.04703 | 040  | 0.01455 | 028  | -0.16 | 0.52  | 296.3 | 6.4 | 316.7 | 2   | 469.3  | 5   | 291.9 | 5.5 |          | 0.5 |
| 0-1-38 | 1.9 |     | 0.6 |        | 0.0 |        | 0.0 |         | 0.00 |         | 0.00 |       |       |       |     | 18.   |     | 29.    |     |       |     |          | 0.1 |
| YM3    | 0   | 38  | 0   | 0.0591 | 036 | 0.3764 | 234 | 0.04617 | 056  | 0.01506 | 054  | 0.34  | 0.86  | 291.0 | 6.8 | 324.4 | 4   | 571.2  | 0   | 302.1 | 10. |          | 0.9 |
| 0-1-39 | 2.4 |     | 0.6 |        | 0.0 |        | 0.0 |         | 0.00 |         | 0.00 |       |       |       |     | 14.   |     | 18.    |     |       |     |          | 0.2 |
| YM3    | 8   | 48  | 0   | 0.0554 | 025 | 0.3626 | 169 | 0.04746 | 053  | 0.01632 | 048  | 0.97  | 0.38  | 298.9 | 6.8 | 314.2 | 1   | 428.6  | 0   | 327.1 | 9.5 |          | 0.4 |
| 0-1-40 | 1.7 |     | 0.5 |        | 0.0 |        | 0.0 |         | 0.00 |         | 0.00 |       |       |       |     | 17.   |     | 32.    |     |       |     |          | 0.2 |
| YM3    | 0   | 36  | 2   | 0.0635 | 036 | 0.3817 | 221 | 0.04357 | 061  | 0.01700 | 052  | 2.27  | 1.46  | 274.9 | 6.7 | 328.3 | 5   | 726.0  | 5   | 340.7 | 10. | excluded | 0.4 |

|       |     |     |     |        |     |        |     |         |      |         |      |       |       |       |     |       |     |       |     |       |     |          |     |
|-------|-----|-----|-----|--------|-----|--------|-----|---------|------|---------|------|-------|-------|-------|-----|-------|-----|-------|-----|-------|-----|----------|-----|
| YM5   |     |     |     |        |     |        |     |         |      |         |      |       |       |       |     |       |     |       |     |       |     |          |     |
| -8-01 | 24. |     | 0.7 |        | 0.0 |        | 0.0 |         | 0.00 |         | 0.00 |       |       |       |     | 10.   |     | 8.6   |     |       |     |          | 0.2 |
| YM5   | 10  | 429 | 2   | 0.0515 | 015 | 0.3552 | 107 | 0.05002 | 042  | 0.01722 | 023  | 1.17  | -0.14 | 314.6 | 6.8 | 308.6 | 1   | 264.4 | 8.6 | 345.1 | 4.5 | excluded | 0.8 |
| -8-02 | 13. |     | 1.5 |        | 0.0 |        | 0.0 |         | 0.00 |         | 0.00 |       |       |       |     | 11.   |     | 18.   |     |       |     |          | 0.1 |
| YM5   | 10  | 206 | 9   | 0.0584 | 021 | 0.3593 | 134 | 0.04463 | 032  | 0.01727 | 053  | 4.20  | 0.80  | 281.5 | 6.0 | 311.7 | 8   | 544.0 | 9   | 346.2 | 10. | excluded | 0.9 |
| -8-03 | 25. |     | 0.6 |        | 0.0 |        | 0.0 |         | 0.00 |         | 0.00 |       |       |       |     | 6.9   |     | 7.6   |     |       |     |          | 0.4 |
| YM5   | 58  | 532 | 0   | 0.0530 | 007 | 0.3241 | 050 | 0.04437 | 032  | 0.01443 | 017  | 0.37  | 0.14  | 279.9 | 5.9 | 285.1 | 6.9 | 327.6 | 7.6 | 289.6 | 3.4 | excluded | 0.7 |
| -8-04 | 11. |     | 0.4 |        | 0.0 |        | 0.0 |         | 0.00 |         | 0.00 |       |       |       |     | 1.03  |     | 14.   |     |       |     |          | 0.4 |
| YM5   | 42  | 266 | 6   | 0.0585 | 014 | 0.3316 | 085 | 0.04108 | 042  | 0.01469 | 031  | 1.03  | 0.88  | 259.5 | 5.8 | 290.8 | 8.7 | 549.9 | 8   | 294.8 | 6.2 | excluded | 0.0 |
| -8-05 | 22. |     | 1.1 |        | 0.0 |        | 0.0 |         | 0.00 |         | 0.00 |       |       |       |     | 0.45  |     | 0.45  |     |       |     |          | 0.3 |
| YM5   | 14  | 392 | 5   | 0.0532 | 007 | 0.3336 | 047 | 0.04552 | 023  | 0.01467 | 013  | 0.45  | 0.14  | 287.0 | 5.9 | 292.3 | 6.9 | 335.0 | 7.7 | 294.4 | 2.6 |          | 0.6 |
| -8-06 | 6.8 |     | 0.7 |        | 0.0 |        | 0.0 |         | 0.00 |         | 0.00 |       |       |       |     | 0.02  |     | 0.24  |     |       |     |          | 0.2 |
| YM5   | 5   | 137 | 8   | 0.0538 | 020 | 0.3280 | 125 | 0.04423 | 037  | 0.01388 | 020  | 0.02  | 0.24  | 279.0 | 6.0 | 288.0 | 11. | 361.5 | 13. | 278.6 | 4.0 |          | 0.2 |
| -8-07 | 11. |     | 0.9 |        | 0.0 |        | 0.0 |         | 0.00 |         | 0.00 |       |       |       |     | 10.   |     | 10.   |     |       |     |          | 0.2 |
| YM5   | 21  | 207 | 2   | 0.0509 | 016 | 0.3261 | 108 | 0.04642 | 044  | 0.01407 | 026  | -0.54 | -0.15 | 292.5 | 6.5 | 286.6 | 0   | 239.2 | 8.3 | 282.4 | 5.2 |          | 0.9 |
| -8-08 | 65. |     | 1.0 |        | 0.0 |        | 0.0 |         | 0.00 |         | 0.00 |       |       |       |     | 0.26  |     | -0.01 |     |       |     |          | 0.5 |
| YM5   | 51  | 119 | 3   | 0.0520 | 005 | 0.3276 | 036 | 0.04571 | 028  | 0.01457 | 009  | 0.26  | -0.01 | 288.1 | 6.0 | 287.7 | 6.4 | 285.4 | 6.1 | 292.3 | 1.8 |          | 0.6 |
| -8-09 | 12. |     | 0.5 |        | 0.0 |        | 0.0 |         | 0.00 |         | 0.00 |       |       |       |     | 0.24  |     | 0.53  |     |       |     |          | 0.2 |
| YM5   | 00  | 251 | 0   | 0.0564 | 012 | 0.3554 | 082 | 0.04573 | 030  | 0.01380 | 028  | -0.24 | 0.53  | 288.2 | 6.0 | 308.8 | 8.7 | 466.8 | 4   | 277.1 | 5.5 |          | 0.8 |











|       |     |     |     |        |       |        |       |         |       |         |       |       |      |       |     |       |     |     |       |     |          |
|-------|-----|-----|-----|--------|-------|--------|-------|---------|-------|---------|-------|-------|------|-------|-----|-------|-----|-----|-------|-----|----------|
| MN1   | 2.0 | 0.4 | 0.0 | 0.0    | 0.0   | 0.0    | 0.0   | 0.0     | 0.0   | 0.0     | 0.0   | 0.10  | 0.42 | 277.8 | 6.4 | 293.7 | 16. | 22. | 282.4 | 9.8 | 0.2      |
| -1-38 | 6   | 45  | 3   | 0.0552 | 0.033 | 0.3355 | 0.208 | 0.04404 | 0.060 | 0.01407 | 0.049 |       |      |       |     |       | 8   | 4   |       |     | 2        |
| MN1   | 2.6 | 0.7 | 0.0 | 0.0    | 0.0   | 0.0    | 0.0   | 0.0     | 0.0   | 0.0     | 0.0   | -0.12 | 0.11 | 272.6 | 5.9 | 276.7 | 11. | 11. | 268.7 | 6.7 | 0.2      |
| -1-39 | 1   | 54  | 3   | 0.0526 | 0.020 | 0.3133 | 0.124 | 0.04319 | 0.045 | 0.01338 | 0.034 |       |      |       |     |       | 0   | 8   |       |     | 7        |
| MN1   | 1.5 | 0.5 | 0.0 | 0.0    | 0.0   | 0.0    | 0.0   | 0.0     | 0.0   | 0.0     | 0.0   | 1.53  | 2.17 | 262.9 | 7.0 | 338.0 | 18. | 37. | 302.5 | 13. | 0.3      |
| -1-40 | 3   | 34  | 6   | 0.0688 | 0.038 | 0.3949 | 0.232 | 0.04163 | 0.080 | 0.01508 | 0.068 |       |      |       |     |       | 1   | 1   |       | 4   | excluded |

| Spot     | ppm<br><sup>206</sup> Pb* | %<br><sup>206</sup> Pb <sub>c</sub> | ppm<br>U | ppm<br>Th | <sup>232</sup> Th<br>/ <sup>238</sup> U | (1)<br><sup>207</sup> Pb*/ <sup>206</sup> Pb* | ±%  | (1)<br><sup>207</sup> Pb*/ <sup>235</sup> U | ±%  | (1)<br><sup>206</sup> Pb*<br>/ <sup>238</sup> U | ±%  | err<br>corr | (1)<br><sup>206</sup> Pb/ <sup>238</sup> U<br>Age | (1)<br><sup>207</sup> Pb/ <sup>206</sup> Pb<br>Age | (1)<br><sup>208</sup> Pb/ <sup>232</sup> Th<br>Age |
|----------|---------------------------|-------------------------------------|----------|-----------|-----------------------------------------|-----------------------------------------------|-----|---------------------------------------------|-----|-------------------------------------------------|-----|-------------|---------------------------------------------------|----------------------------------------------------|----------------------------------------------------|
| NK1-1.1  | 8.27                      | 1.80                                | 222      | 99        | 0.46                                    | 0.0568                                        | 7.9 | 0.333                                       | 8.0 | 0.04250                                         | 1.5 | .189        | 268.3 ±4.0                                        | 484 ±170                                           | 282 ±21                                            |
| NK1-2.1  | 21.3                      | 0.84                                | 549      | 305       | 0.57                                    | 0.0511                                        | 4.6 | 0.316                                       | 4.8 | 0.04482                                         | 1.2 | .257        | 282.7 ±3.4                                        | 245 ±110                                           | 287.5 ±8.9                                         |
| NK1-3.1  | 19.6                      | 0.66                                | 514      | 201       | 0.40                                    | 0.0572                                        | 5.1 | 0.348                                       | 5.2 | 0.04410                                         | 1.3 | .242        | 278.2 ±3.5                                        | 500 ±110                                           | 306 ±17                                            |
| NK1-4.1  | 8.26                      | 2.44                                | 217      | 102       | 0.48                                    | 0.0586                                        | 7.8 | 0.349                                       | 8.0 | 0.04320                                         | 1.5 | .192        | 272.7 ±4.1                                        | 554 ±170                                           | 294 ±23                                            |
| NK1-2.2  | 7.27                      | 2.39                                | 188      | 96        | 0.52                                    | 0.0538                                        | 9.6 | 0.325                                       | 9.8 | 0.04381                                         | 1.7 | .171        | 276.4 ±4.5                                        | 361 ±220                                           | 288 ±25                                            |
| NK1-5.1  | 8.10                      | 1.31                                | 204      | 128       | 0.65                                    | 0.0550                                        | 12  | 0.345                                       | 12  | 0.04551                                         | 1.7 | .139        | 286.9 ±4.7                                        | 413 ±270                                           | 295 ±25                                            |
| NK1-6.1  | 14.2                      | 1.69                                | 365      | 162       | 0.46                                    | 0.0506                                        | 6.3 | 0.310                                       | 6.5 | 0.04443                                         | 1.3 | .204        | 280.2 ±3.6                                        | 221 ±150                                           | 280 ±17                                            |
| NK1-7.1  | 3.95                      | 3.31                                | 102      | 43        | 0.44                                    | 0.0625                                        | 13  | 0.375                                       | 13  | 0.04346                                         | 2.0 | .150        | 274.2 ±5.3                                        | 693 ±280                                           | 345 ±43                                            |
| NK1-8.1  | 11.7                      | 2.14                                | 306      | 127       | 0.43                                    | 0.0538                                        | 7.2 | 0.322                                       | 7.4 | 0.04348                                         | 1.4 | .190        | 274.4 ±3.8                                        | 361 ±160                                           | 282 ±23                                            |
| NK1-9.1  | 8.87                      | 1.72                                | 230      | 92        | 0.41                                    | 0.0647                                        | 8.4 | 0.393                                       | 8.6 | 0.04404                                         | 1.5 | .177        | 277.8 ±4.1                                        | 766 ±180                                           | 344 ±30                                            |
| NK1-10.1 | 4.97                      | 1.94                                | 129      | 58        | 0.46                                    | 0.0695                                        | 13  | 0.422                                       | 13  | 0.04401                                         | 2.3 | .176        | 277.7 ±6.1                                        | 914 ±260                                           | 354 ±43                                            |

Errors are 1-sigma; Pb<sub>c</sub> and Pb\* indicate the common and radiogenic portions, respectively.

Tian *et al.* (2010)

| Spot                                            | U   | Th  | Th/U | f <sub>206</sub> <sup>#</sup> | <sup>206</sup> Pb*/ <sup>238</sup> U<br>(±1σ%) | <sup>207</sup> Pb*/ <sup>235</sup> U<br>(±1σ%) | <sup>207</sup> Pb*/ <sup>206</sup> Pb*<br>(±1σ%) | <sup>206</sup> Pb/ <sup>238</sup> U Age<br>(Ma) (±1σ) | <sup>207</sup> Pb/ <sup>206</sup> Pb Age<br>(Ma) (±1σ) | RHO |       |     |      |     |      |
|-------------------------------------------------|-----|-----|------|-------------------------------|------------------------------------------------|------------------------------------------------|--------------------------------------------------|-------------------------------------------------------|--------------------------------------------------------|-----|-------|-----|------|-----|------|
| <i>Piqing ultramafic-mafic complex (08KT01)</i> |     |     |      |                               |                                                |                                                |                                                  |                                                       |                                                        |     |       |     |      |     |      |
| 1.1                                             | 148 | 74  | 0.51 | 2.24                          | 0.0785                                         | 11.2                                           | 0.48                                             | 11.4                                                  | 0.044                                                  | 2.1 | 307.6 | 4.9 | 530  | 210 | 0.19 |
| 2.1                                             | 180 | 121 | 0.7  | 4.42                          | 0.0558                                         | 2.4                                            | 0.34                                             | 2.7                                                   | 0.0437                                                 | 1.3 | 296.9 | 4.4 | 536  | 178 | 0.46 |
| 3.1                                             | 172 | 70  | 0.42 | 1.72                          | 0.0808                                         | 7.9                                            | 0.49                                             | 8                                                     | 0.0438                                                 | 1.5 | 272.3 | 4.1 | 316  | 287 | 0.16 |
| 4.1                                             | 61  | 36  | 0.6  | 4.08                          | 0.0587                                         | 20.6                                           | 0.38                                             | 20.7                                                  | 0.0467                                                 | 1.9 | 277.3 | 5.6 | 1160 | 223 | 0.10 |
| 5.1                                             | 254 | 246 | 1    | 0.77                          | 0.0505                                         | 3.9                                            | 0.3                                              | 4.1                                                   | 0.0434                                                 | 1.3 | 276   | 3.6 | 446  | 53  | 0.31 |

|      |     |     |      |      |        |      |      |      |        |     |       |      |      |     |      |
|------|-----|-----|------|------|--------|------|------|------|--------|-----|-------|------|------|-----|------|
| 6.1  | 160 | 136 | 0.88 | 0.85 | 0.0494 | 4.1  | 0.3  | 4.2  | 0.0442 | 1.3 | 276.6 | 4.2  | 1216 | 155 | 0.23 |
| 7.1  | 94  | 73  | 0.8  | 2.63 | 0.0648 | 13.9 | 0.41 | 14   | 0.0456 | 1.7 | 294.1 | 5.6  | 554  | 449 | 0.12 |
| 8.1  | 455 | 524 | 1.19 | 1.65 | 0.0617 | 7.9  | 0.37 | 8.1  | 0.0438 | 1.6 | 274.1 | 3.4  | 220  | 90  | 0.22 |
| 9.1  | 531 | 211 | 0.41 | 1.58 | 0.0478 | 9.1  | 0.3  | 9.2  | 0.0455 | 1.4 | 279   | 3.4  | 165  | 95  | 0.15 |
| 10.1 | 115 | 59  | 0.53 | 0.76 | 0.0509 | 5.6  | 0.28 | 5.7  | 0.0403 | 1.3 | 287.2 | 4.9  | 768  | 293 | 0.19 |
| 11.1 | 120 | 59  | 0.51 | 1.71 | 0.0682 | 15   | 0.42 | 15.1 | 0.0451 | 1.6 | 276.6 | 4.3  | 662  | 169 | 0.12 |
| 12.1 | 234 | 225 | 0.99 | 2.28 | 0.0681 | 11.9 | 0.41 | 12   | 0.0435 | 1.6 | 287   | 4    | 89   | 215 | 0.13 |
| 13.1 | 452 | 329 | 0.75 | 6.97 | 0.0686 | 42.1 | 0.41 | 42.3 | 0.0436 | 3.7 | 255   | 3.2  | 238  | 129 | 0.10 |
| 14.1 | 150 | 78  | 0.54 | 2.24 | 0.0785 | 11.2 | 0.48 | 11.4 | 0.044  | 2.1 | 284.1 | 4.5  | 875  | 311 | 0.19 |
| 15.1 | 139 | 112 | 0.83 | 0.42 | 0.0558 | 2.4  | 0.34 | 2.7  | 0.0437 | 1.3 | 274.5 | 4.4  | 870  | 246 | 0.46 |
| 16.1 | 62  | 39  | 0.66 | 1.72 | 0.0808 | 7.9  | 0.49 | 8    | 0.0438 | 1.5 | 275.2 | 10.1 | 887  | 870 | 0.16 |
| 17.1 | 128 | 93  | 0.75 | 2.64 | 0.0494 | 14.6 | 0.3  | 14.7 | 0.0439 | 1.8 | 276.9 | 4.9  | 169  | 342 | 0.12 |
| 18.1 | 168 | 88  | 0.54 | 0.75 | 0.0614 | 5    | 0.37 | 5.2  | 0.044  | 1.6 | 277.8 | 4.3  | 654  | 107 | 0.28 |

*Halajun granite ( pluton I, 08KT02)*

|      |     |    |      |      |        |      |      |      |        |     |       |      |      |     |      |
|------|-----|----|------|------|--------|------|------|------|--------|-----|-------|------|------|-----|------|
| 1.1  | 80  | 44 | 0.56 | 2.6  | 0.0917 | 29.3 | 0.58 | 29.6 | 0.046  | 3.8 | 289.8 | 10.9 | 1461 | 557 | 0.14 |
| 2.1  | 112 | 56 | 0.51 | 1    | 0.05   | 20.3 | 0.3  | 20.4 | 0.0434 | 1.6 | 273.8 | 4.2  | 197  | 472 | 0.10 |
| 3.1  | 145 | 80 | 0.57 | 0.9  | 0.0532 | 14.3 | 0.33 | 14.3 | 0.0446 | 1.3 | 281.3 | 3.4  | 338  | 323 | 0.05 |
| 4.1  | 90  | 34 | 0.39 | 1.1  | 0.0757 | 19.6 | 0.48 | 19.7 | 0.0458 | 1.7 | 288.4 | 4.8  | 1088 | 393 | 0.10 |
| 5.1  | 109 | 61 | 0.58 | 1    | 0.0539 | 26.7 | 0.32 | 26.7 | 0.0435 | 1.8 | 274.8 | 4.8  | 367  | 601 | 0.03 |
| 6.1  | 169 | 64 | 0.39 | 0.8  | 0.051  | 11.2 | 0.31 | 11.2 | 0.0438 | 1   | 276.4 | 2.8  | 239  | 258 | 0.04 |
| 7.1  | 155 | 86 | 0.57 | 1.3  | 0.0558 | 11   | 0.34 | 11.1 | 0.0444 | 1.5 | 279.8 | 4.1  | 443  | 245 | 0.13 |
| 8.1  | 122 | 84 | 0.71 | 0.9  | 0.053  | 20.1 | 0.32 | 20.2 | 0.0443 | 1.3 | 279.4 | 3.6  | 329  | 457 | 0.11 |
| 9.1  | 109 | 73 | 0.69 | 1    | 0.0503 | 25.8 | 0.3  | 25.8 | 0.0436 | 1.5 | 275   | 4    | 207  | 598 | 0.03 |
| 10.1 | 146 | 95 | 0.67 | 0.8  | 0.0587 | 18.2 | 0.35 | 18.2 | 0.0436 | 1.5 | 275.2 | 3.9  | 556  | 396 | 0.04 |
| 11.1 | 115 | 78 | 0.7  | 1.4  | 0.0534 | 15.6 | 0.33 | 15.7 | 0.0442 | 1.7 | 278.8 | 4.6  | 344  | 353 | 0.11 |
| 12.1 | 129 | 79 | 0.63 | 0.9  | 0.0537 | 11.6 | 0.32 | 11.6 | 0.0427 | 1   | 269.6 | 2.8  | 359  | 261 | 0.04 |
| 13.1 | 118 | 80 | 0.7  | 2.46 | 0.0547 | 14.5 | 0.33 | 14.7 | 0.0442 | 2.3 | 278.6 | 6.2  | 400  | 324 | 0.16 |
| 14.1 | 146 | 94 | 0.67 | 1.2  | 0.0589 | 9.6  | 0.37 | 9.9  | 0.045  | 2.2 | 284   | 6    | 565  | 210 | 0.25 |

*Halajun granite ( pluton II, 08KT03)*

|     |     |     |      |      |        |     |      |     |        |     |       |      |     |    |      |
|-----|-----|-----|------|------|--------|-----|------|-----|--------|-----|-------|------|-----|----|------|
| 1.1 | 840 | 217 | 0.27 | 0.12 | 0.0584 | 1.2 | 0.74 | 2.3 | 0.0922 | 1.9 | 569.1 | 10.7 | 546 | 25 | 0.85 |
| 2.1 | 188 | 80  | 0.44 | 0.48 | 0.06   | 4   | 0.36 | 4.5 | 0.0439 | 2.1 | 274.1 | 5.6  | 604 | 87 | 0.46 |

|      |     |     |      |      |        |     |      |      |        |     |       |     |      |     |      |
|------|-----|-----|------|------|--------|-----|------|------|--------|-----|-------|-----|------|-----|------|
| 3.1  | 115 | 78  | 0.7  | 0.99 | 0.0648 | 9.6 | 0.4  | 9.9  | 0.0453 | 2.2 | 281   | 6.3 | 767  | 203 | 0.25 |
| 4.1  | 270 | 91  | 0.35 | 0.29 | 0.0599 | 3.6 | 0.37 | 4.1  | 0.0449 | 2   | 280.7 | 5.6 | 601  | 77  | 0.48 |
| 5.1  | 506 | 233 | 0.48 | 0.42 | 0.0738 | 3.9 | 0.45 | 4.3  | 0.0438 | 2   | 269   | 5.3 | 1037 | 78  | 0.42 |
| 6.1  | 239 | 104 | 0.45 | 0.26 | 0.0645 | 3.5 | 0.39 | 4.1  | 0.0443 | 2   | 275.3 | 5.5 | 758  | 74  | 0.52 |
| 7.1  | 80  | 30  | 0.39 | 1.11 | 0.0808 | 10  | 0.48 | 10.3 | 0.0431 | 2.4 | 262.7 | 6.1 | 1216 | 197 | 0.24 |
| 8.1  | 197 | 88  | 0.46 | 0.65 | 0.0704 | 7   | 0.44 | 7.3  | 0.0452 | 2   | 278.5 | 5.8 | 939  | 143 | 0.28 |
| 9.1  | 132 | 53  | 0.42 | 0.51 | 0.0745 | 7.1 | 0.47 | 7.4  | 0.0457 | 2.1 | 280.5 | 6   | 1055 | 144 | 0.28 |
| 10.1 | 213 | 99  | 0.48 | 0.12 | 0.0688 | 4.7 | 0.41 | 5.1  | 0.0427 | 2   | 263.8 | 5.4 | 894  | 98  | 0.39 |
| 11.1 | 240 | 94  | 0.41 | 0.14 | 0.0694 | 2.1 | 0.41 | 2.9  | 0.0432 | 2   | 266.9 | 5.3 | 912  | 43  | 0.69 |
| 12.1 | 235 | 116 | 0.51 | 0.17 | 0.0594 | 2.2 | 0.35 | 3    | 0.0424 | 2   | 265.2 | 5.3 | 580  | 49  | 0.68 |
| 13.1 | 115 | 46  | 0.41 | 0.64 | 0.0753 | 8.9 | 0.45 | 9.2  | 0.0432 | 2.1 | 265.1 | 6   | 1076 | 179 | 0.25 |
| 14.1 | 260 | 112 | 0.45 | 0.1  | 0.0665 | 6.3 | 0.41 | 6.6  | 0.0448 | 2   | 277.6 | 5.7 | 823  | 131 | 0.30 |
| 15.1 | 211 | 95  | 0.46 | 0.17 | 0.0713 | 7.1 | 0.43 | 7.3  | 0.0433 | 2   | 266.8 | 5.6 | 965  | 144 | 0.24 |
| 16.1 | 160 | 86  | 0.55 | 0    | 0.0772 | 7.4 | 0.49 | 7.7  | 0.0457 | 2.1 | 279.2 | 6.1 | 1126 | 147 | 0.28 |
| 17.1 | 340 | 140 | 0.43 | 0    | 0.0644 | 6.5 | 0.39 | 6.8  | 0.0437 | 2   | 271.7 | 5.5 | 756  | 136 | 0.29 |

#  $f_{206}$ : percentage of common  $^{206}\text{Pb}$  in total  $^{206}\text{Pb}$

Zhang *et al.* (2010)

| Spot | U<br>(ppm) | Th<br>(ppm) | Th/U | <sup>206</sup> Pb* | <sup>207</sup> Pb/ <sup>206</sup> Pb | 1σ   | <sup>207</sup> Pb/ <sup>235</sup> U | 1σ   | <sup>206</sup> Pb/ <sup>238</sup> U | 1σ   | <sup>207</sup> Pb/ <sup>235</sup> U(Ma) | 1σ   | <sup>206</sup> Pb/ <sup>238</sup> U(Ma) | 1σ  | RHO  |
|------|------------|-------------|------|--------------------|--------------------------------------|------|-------------------------------------|------|-------------------------------------|------|-----------------------------------------|------|-----------------------------------------|-----|------|
| 1    | 72         | 42          | 0.58 | 0.1                | 0.0545                               | 3.37 | 0.329                               | 4.02 | 0.0445                              | 1.52 | 288.9                                   | 10.1 | 280.4                                   | 4.2 | 0.58 |
| 2    | 239        | 195         | 0.81 | 0.06               | 0.0536                               | 1.84 | 0.326                               | 2.46 | 0.0445                              | 1.5  | 286.5                                   | 6.2  | 280.6                                   | 4.1 | 0.67 |
| 3    | 290        | 214         | 0.74 | 0.09               | 0.0521                               | 1.67 | 0.313                               | 2.38 | 0.0442                              | 1.5  | 276.3                                   | 5.8  | 278.7                                   | 4.1 | 0.72 |
| 4    | 45         | 27          | 0.62 | 0.45               | 0.0551                               | 4.13 | 0.315                               | 6.12 | 0.0443                              | 1.52 | 278.3                                   | 15   | 279.5                                   | 4.2 | 1.22 |
| 5    | 207        | 168         | 0.81 | 0.07               | 0.0515                               | 1.96 | 0.316                               | 2.51 | 0.0445                              | 1.57 | 279.2                                   | 6.1  | 280.9                                   | 4.3 | 0.62 |
| 6    | 115        | 66          | 0.58 | 0.23               | 0.0514                               | 2.6  | 0.308                               | 3.88 | 0.045                               | 1.58 | 272.5                                   | 9.3  | 283.5                                   | 4.4 | 0.88 |
| 7    | 79         | 47          | 0.59 | 0.6                | 0.0518                               | 4.77 | 0.316                               | 5    | 0.0443                              | 1.5  | 279.1                                   | 12.3 | 279.3                                   | 4.1 | 0.30 |
| 8    | 66         | 40          | 0.6  | 0.4                | 0.0523                               | 3.43 | 0.319                               | 3.76 | 0.0443                              | 1.53 | 281.3                                   | 9.3  | 279.2                                   | 4.2 | 0.41 |
| 9    | 78         | 50          | 0.64 | 0.26               | 0.0537                               | 3.62 | 0.312                               | 4.68 | 0.0438                              | 1.52 | 275.6                                   | 11.4 | 276.5                                   | 4.1 | 0.78 |
| 10   | 85         | 54          | 0.63 | 0.24               | 0.498                                | 3.34 | 0.304                               | 3.74 | 0.0443                              | 1.67 | 269.8                                   | 8.9  | 279.7                                   | 4.6 | 0.45 |
| 11   | 104        | 93          | 0.89 | 0                  | 0.0521                               | 2.83 | 0.316                               | 3.22 | 0.044                               | 1.54 | 278.7                                   | 7.9  | 277.3                                   | 4.2 | 0.48 |
| 12   | 83         | 57          | 0.69 | 0.71               | 0.0523                               | 3.16 | 0.316                               | 3.5  | 0.0437                              | 1.51 | 278.4                                   | 8.6  | 276                                     | 4.1 | 0.43 |
| 13   | 111        | 70          | 0.63 | 0.18               | 0.0509                               | 2.89 | 0.312                               | 3.27 | 0.0444                              | 1.52 | 275.6                                   | 7.9  | 280.3                                   | 4.2 | 0.47 |
| 14   | 202        | 197         | 0.97 | 0.21               | 0.0524                               | 2.31 | 0.309                               | 3.34 | 0.0441                              | 1.51 | 273.3                                   | 8    | 278.4                                   | 4.1 | 0.80 |
| 15   | 131        | 81          | 0.61 | 0                  | 0.0526                               | 2.52 | 0.321                               | 2.94 | 0.0443                              | 1.52 | 282.9                                   | 7.3  | 279.6                                   | 4.1 | 0.52 |
| 16   | 59         | 39          | 0.67 | 0.28               | 0.0521                               | 3.87 | 0.321                               | 4.17 | 0.0446                              | 1.57 | 282.5                                   | 10.3 | 281.4                                   | 4.3 | 0.37 |
| 17   | 82         | 50          | 0.61 | 0.17               | 0.0548                               | 4.5  | 0.328                               | 5.21 | 0.0445                              | 1.6  | 288.1                                   | 13.1 | 280.9                                   | 4.4 | 0.57 |
| 18   | 103        | 81          | 0.79 | 0.13               | 0.0537                               | 2.79 | 0.327                               | 3.52 | 0.0451                              | 1.54 | 287.4                                   | 8.8  | 284.3                                   | 4.3 | 0.64 |

Wei & Xu. (2011)

| Spot     | Th<br>ppm | U<br>ppm | Th/U | Isotope ratio                          |            |                                       |            |                                       |            | Age (Ma)                          |            |                                  |            |                                  |            | RHO   |
|----------|-----------|----------|------|----------------------------------------|------------|---------------------------------------|------------|---------------------------------------|------------|-----------------------------------|------------|----------------------------------|------------|----------------------------------|------------|-------|
|          |           |          |      | $^{207}\text{Pb}/^{206}\text{Pb}$<br>b | 1 $\sigma$ | $^{207}\text{Pb}/^{235}\text{U}$<br>U | 1 $\sigma$ | $^{206}\text{Pb}/^{238}\text{U}$<br>U | 1 $\sigma$ | $^{207}\text{Pb}/^{206}\text{Pb}$ | 1 $\sigma$ | $^{207}\text{Pb}/^{235}\text{U}$ | 1 $\sigma$ | $^{206}\text{Pb}/^{238}\text{U}$ | 1 $\sigma$ |       |
| S79_3-1  | 71        | 156      | 0.45 | 0.0536                                 | 0.004      | 0.3248                                | 0.026      | 0.044                                 | 0.000      | 352                               | 19         | 286                              | 20         | 278                              | 3          | 0.08  |
| S79_3-2  | 83        | 181      | 0.46 | 0.0513                                 | 0.003      | 0.3129                                | 0.020      | 0.0449                                | 0.000      | 254                               | 12         | 276                              | 16         | 283                              | 3          | 0.19  |
| S79_3-3  | 141       | 267      | 0.53 | 0.1242                                 | 0.018      | 2.8027                                | 0.858      | 0.1417                                | 0.002      | 2017                              | 62         | 1356                             | 9          | 854                              | 13         | 7.28  |
| S79_3-4  | 111       | 263      | 0.42 | 0.0546                                 | 0.004      | 0.3307                                | 0.028      | 0.0443                                | 0.000      | 396                               | 17         | 290                              | 22         | 279                              | 5          | 0.49  |
| S79_3-5  | 180       | 329      | 0.55 | 0.0477                                 | 0.004      | 0.2895                                | 0.028      | 0.0444                                | 0.000      | 84                                | 19         | 258                              | 23         | 280                              | 7          | 0.64  |
| S79_3-6  | 122       | 270      | 0.45 | 0.0522                                 | 0.004      | 0.3423                                | 0.032      | 0.0048                                | 0.000      | 295                               | 19         | 299                              | 25         | 302                              | 5          | 0.70  |
| S79_3-7  | 111       | 256      | 0.43 | 0.0511                                 | 0.003      | 0.3106                                | 0.024      | 0.0444                                | 0.000      | 247                               | 15         | 275                              | 19         | 280                              | 9          | 0.51  |
| S79_3-8  | 209       | 380      | 0.55 | 0.0518                                 | 0.002      | 0.3154                                | 0.018      | 0.0445                                | 0.000      | 276                               | 11         | 278                              | 14         | 281                              | 4          | 0.43  |
| S79_3-9  | 88        | 190      | 0.47 | 0.0537                                 | 0.002      | 0.3243                                | 0.016      | 0.0444                                | 0.000      | 358                               | 91         | 285                              | 13         | 280                              | 2          | 0.19  |
| S79_3-10 | 185       | 442      | 0.42 | 0.0517                                 | 0.001      | 0.3148                                | 0.011      | 0.0444                                | 0.000      | 273                               | 67         | 278                              | 9          | 280                              | 4          | 0.20  |
| S79_3-11 | 103       | 202      | 0.51 | 0.0598                                 | 0.002      | 0.3522                                | 0.014      | 0.0432                                | 0.000      | 595                               | 64         | 306                              | 11         | 272                              | 3          | 0.01  |
| S79_3-12 | 79        | 186      | 0.43 | 0.0543                                 | 0.002      | 0.3278                                | 0.014      | 0.0443                                | 0.000      | 384                               | 75         | 288                              | 11         | 279                              | 9          | 0.02  |
| S79_3-13 | 144       | 322      | 0.45 | 0.0576                                 | 0.003      | 0.3473                                | 0.021      | 0.0438                                | 0.000      | 513                               | 13         | 303                              | 16         | 276                              | 7          | 0.04  |
| S79_3-14 | 52        | 98       | 0.53 | 0.0523                                 | 0.006      | 0.3302                                | 0.038      | 0.0458                                | 0.000      | 296                               | 26         | 290                              | 29         | 289                              | 5          | 0.06  |
| S79_3-15 | 169       | 246      | 0.69 | 0.0538                                 | 0.006      | 0.0668                                | 0.007      | 0.0009                                | 0.000      | 364                               | 26         | 66                               | 7          | 58                               | 1          | 0.97  |
| S79_3-16 | 50        | 82       | 0.61 | 0.0608                                 | 0.003      | 0.3646                                | 0.018      | 0.0445                                | 0.000      | 633                               | 74         | 316                              | 14         | 281                              | 5          | -0.02 |
| S79_3-17 | 89        | 183      | 0.49 | 0.0529                                 | 0.002      | 0.3226                                | 0.013      | 0.0444                                | 0.000      | 323                               | 71         | 284                              | 10         | 280                              | 7          | -0.03 |
| S79_3-18 | 163       | 235      | 0.07 | 0.0507                                 | 0.002      | 0.2673                                | 0.011      | 0.0383                                | 0.000      | 227                               | 72         | 241                              | 9          | 242                              | 3          | 0.12  |
| S79_3-19 | 49        | 88       | 0.56 | 0.0589                                 | 0.003      | 0.3748                                | 0.019      | 0.0461                                | 0.000      | 563                               | 84         | 323                              | 14         | 291                              | 9          | 0.13  |
| S79_3-20 | 73        | 119      | 0.61 | 0.0527                                 | 0.002      | 0.3215                                | 0.014      | 0.0453                                | 0.000      | 317                               | 72         | 283                              | 11         | 285                              | 4          | -0.09 |
| S99-1    | 71        | 132      | 0.54 | 0.0464                                 | 0.007      | 0.2673                                | 0.045      | 0.0418                                | 0.000      | 16                                | 30         | 241                              | 36         | 264                              | 3.         | 0.02  |

|        |     |     |      |        |            |        |                |        |            |     |          |     |    |     |         |       |
|--------|-----|-----|------|--------|------------|--------|----------------|--------|------------|-----|----------|-----|----|-----|---------|-------|
| S99-2  | 82  | 145 | 0.57 | 0.0534 | 0.002<br>8 | 0.3149 | 0.016<br>6     | 0.0043 | 0.000<br>6 | 346 | 92       | 278 | 13 | 271 | 3.<br>4 | 1.33  |
| S99-3  | 54  | 101 | 0.54 | 0.0555 | 0.005<br>1 | 0.3241 | 0.029<br>4     | 0.0423 | 0.000<br>6 | 434 | 21<br>0  | 285 | 23 | 267 | 3.<br>7 | -0.01 |
| S99-4  | 82  | 163 | 0.05 | 0.0506 | 0.002<br>5 | 0.3027 | 0.014<br>4     | 0.0437 | 0.000<br>6 | 224 | 78       | 268 | 11 | 276 | 3.<br>9 | 0.01  |
| S99-5  | 61  | 107 | 0.57 | 0.0556 | 0.003<br>5 | 0.3227 | 0.019<br>3     | 0.0429 | 0.000<br>6 | 435 | 10<br>3  | 284 | 15 | 271 | 4<br>3. | -0.11 |
| S99-6  | 58  | 124 | 0.47 | 0.0516 | 0.002<br>6 | 0.3    | 0.014<br>3     | 0.0432 | 0.000<br>6 | 266 | 80       | 266 | 11 | 273 | 7<br>2. | -0.06 |
| S99-7  | 125 | 231 | 0.54 | 0.0548 | 0.003<br>5 | 0.3105 | 0.024<br>1     | 0.0411 | 0.000<br>5 | 403 | 78       | 275 | 11 | 260 | 9<br>3. | 0.12  |
| S99-8  | 74  | 172 | 0.43 | 0.0548 | 0.000<br>8 | 0.3532 | 0.017<br>2     | 0.0468 | 0.000<br>6 | 403 | 16<br>1  | 307 | 18 | 295 | 6<br>3. | 0.03  |
| S99-9  | 56  | 112 | 0.05 | 0.0049 | 0.002<br>3 | 0.2947 | 0.013<br>4     | 0.0439 | 0.000<br>6 | 150 | 5        | 262 | 14 | 277 | 7<br>3. | -0.05 |
| S99-10 | 81  | 146 | 0.55 | 0.0521 | 0.002<br>5 | 0.3068 | 0.013<br>8     | 0.0434 | 0.000<br>5 | 287 | 77       | 272 | 11 | 274 | 2<br>2. | -0.14 |
| S99-11 | 84  | 171 | 0.49 | 0.0499 | 0.002<br>4 | 0.2875 | 0.016<br>7     | 0.0418 | 0.000<br>5 | 188 | 88       | 257 | 11 | 264 | 8<br>3. | 0.09  |
| S99-12 | 63  | 120 | 0.53 | 0.0545 | 0.002<br>9 | 0.3211 | 0.015<br>6     | 0.0435 | 0.000<br>6 | 391 | 87       | 283 | 13 | 274 | 8<br>3. | 0.02  |
| S99-13 | 52  | 118 | 0.44 | 0.0495 | 0.002<br>7 | 0.2915 | 0.012<br>0.015 | 0.0433 | 0.000<br>6 | 171 | 91       | 260 | 12 | 273 | 4<br>2. | -0.09 |
| S99-14 | 111 | 183 | 0.61 | 0.0543 | 0.002<br>2 | 0.3262 | 0.013<br>8     | 0.0437 | 0.000<br>5 | 383 | 66       | 287 | 10 | 276 | 8<br>2. | 0.03  |
| S99-15 | 73  | 162 | 0.45 | 0.0517 | 0.002<br>2 | 0.3111 | 0.013<br>1     | 0.0437 | 0.000<br>5 | 274 | 74       | 275 | 10 | 276 | 9<br>9  | 0.10  |
| S99-16 | 82  | 147 | 0.55 | 0.053  | 0.002<br>3 | 0.3185 | 0.012<br>6     | 0.0437 | 0.000<br>5 | 331 | 74       | 281 | 10 | 276 | 3<br>2. | 0.07  |
| S99-17 | 109 | 166 | 0.66 | 0.0514 | 0.004<br>1 | 0.3069 | 0.024<br>4     | 0.0436 | 0.000<br>4 | 261 | 72       | 272 | 10 | 275 | 7<br>5. | 0.06  |
| S99-18 | 34  | 61  | 0.56 | 0.0621 | 0.002<br>2 | 0.3801 | 0.016<br>7     | 0.0452 | 0.000<br>8 | 677 | 10<br>3  | 327 | 18 | 285 | 1<br>3. | -0.02 |
| S99-19 | 47  | 110 | 0.43 | 0.0517 | 0.002<br>8 | 0.309  | 0.014<br>6     | 0.0437 | 0.000<br>6 | 274 | 95       | 273 | 13 | 276 | 6<br>3. | 0.10  |
| S99-20 | 74  | 132 | 0.56 | 0.0545 | 0.002<br>5 | 0.3235 | 0.017<br>7     | 0.0433 | 0.000<br>5 | 390 | 12<br>77 | 285 | 11 | 273 | 4.<br>2 | 0.09  |
| S99-21 | 41  | 86  | 0.48 | 0.0549 | 0.002<br>9 | 0.3216 | 0.015<br>0.017 | 0.0436 | 0.000<br>7 | 407 | 8<br>11  | 283 | 13 | 275 | 6<br>3. | 0.15  |
| S99-22 | 66  | 137 | 0.48 | 0.0531 | 0.002<br>6 | 0.3185 | 0.015<br>3     | 0.0438 | 0.000<br>6 | 333 | 6        | 281 | 12 | 276 | 7<br>7  | 0.07  |

|          |     |     |      |        |            |        |                |        |            |     |    |     |    |     |         |      |
|----------|-----|-----|------|--------|------------|--------|----------------|--------|------------|-----|----|-----|----|-----|---------|------|
| S102_1-1 | 102 | 168 | 0.61 | 0.0558 | 0.002<br>2 | 0.3342 | 0.013<br>0.012 | 0.0435 | 0.000<br>4 | 445 | 65 | 293 | 10 | 275 | 7<br>2. | 0.06 |
| S102_1-2 | 132 | 271 | 0.49 | 0.052  | 0.002      | 0.3331 | 7              | 0.0465 | 0.000<br>5 | 285 | 67 | 292 | 10 | 293 | 8       | 0.11 |



|           |     |     |      |        |                |        |                |        |            |     |             |     |    |     |          |         |
|-----------|-----|-----|------|--------|----------------|--------|----------------|--------|------------|-----|-------------|-----|----|-----|----------|---------|
| S102_1-3  | 125 | 226 | 0.55 | 0.0717 | 0.016<br>3     | 0.4107 | 30.08<br>5     | 0.0427 | 0.000<br>4 | 979 | 43<br>6     | 349 | 61 | 269 | 2.<br>4  | 3909.84 |
| S102_1-4  | 46  | 88  | 0.52 | 0.0522 | 0.003<br>2     | 0.3054 | 0.018<br>6     | 0.0428 | 0.000<br>6 | 294 | 11<br>0     | 271 | 14 | 270 | 3.<br>7  | 0.09    |
| S102_1-5  | 252 | 693 | 0.36 | 0.0539 | 0.001<br>3     | 0.3396 | 0.008<br>1     | 0.0454 | 0.000<br>4 | 368 | 0.000<br>4  | 297 | 6  | 286 | 2.<br>3  | 0.15    |
| S102_1-6  | 45  | 116 | 0.39 | 0.0548 | 0.002<br>8     | 0.3394 | 0.016<br>8     | 0.0454 | 0.000<br>7 | 403 | 0.000<br>80 | 297 | 13 | 286 | 4.<br>3. | 0.05    |
| S102_1-7  | 68  | 130 | 0.52 | 0.0481 | 0.002<br>5     | 0.2978 | 0.015<br>5     | 0.0452 | 0.000<br>6 | 104 | 0.000<br>87 | 265 | 12 | 285 | 9.<br>3. | 0.13    |
| S102_1-8  | 71  | 154 | 0.46 | 0.0514 | 0.003<br>0.005 | 0.3067 | 0.033<br>8     | 0.0443 | 0.000<br>5 | 261 | 0.000<br>24 | 272 | 12 | 279 | 2.<br>5. | -0.54   |
| S102_1-9  | 39  | 50  | 0.78 | 0.0461 | 0.003<br>6     | 0.2767 | 0.022<br>5     | 0.0436 | 0.000<br>6 | 261 | 0.000<br>15 | 248 | 27 | 275 | 3.<br>2. | 0.03    |
| S102_1-10 | 89  | 148 | 0.06 | 0.0539 | 0.002<br>6     | 0.3413 | 0.013<br>6     | 0.0459 | 0.000<br>5 | 366 | 0.000<br>5  | 298 | 17 | 290 | 9.<br>2. | 0.03    |
| S102_1-11 | 95  | 209 | 0.45 | 0.052  | 0.001<br>2     | 0.3231 | 0.010<br>4     | 0.0453 | 0.000<br>5 | 284 | 0.000<br>73 | 284 | 10 | 285 | 9.<br>2. | 0.06    |
| S102_1-12 | 134 | 360 | 0.37 | 0.0554 | 0.003<br>7     | 0.3364 | 0.021<br>3     | 0.0044 | 0.000<br>3 | 429 | 0.000<br>52 | 294 | 8  | 277 | 1.<br>2. | 1.11    |
| S102_1-13 | 89  | 181 | 0.49 | 0.0713 | 0.003<br>6     | 0.4404 | 0.012<br>6     | 0.0451 | 0.000<br>4 | 966 | 0.000<br>83 | 371 | 15 | 285 | 6.<br>2. | -0.07   |
| S102_1-14 | 101 | 207 | 0.49 | 0.0553 | 0.002<br>0.003 | 0.3392 | 0.021<br>1     | 0.0448 | 0.000<br>4 | 425 | 0.000<br>59 | 297 | 9  | 282 | 7.<br>4. | 0.07    |
| S102_1-15 | 64  | 84  | 0.76 | 0.0534 | 0.003<br>2     | 0.3571 | 0.021<br>7     | 0.0494 | 0.000<br>7 | 344 | 0.000<br>10 | 310 | 16 | 311 | 5.<br>4. | 0.18    |
| S102_1-16 | 48  | 71  | 0.67 | 0.0583 | 0.008<br>7     | 0.3554 | 0.122<br>6     | 0.0456 | 0.000<br>7 | 540 | 0.000<br>51 | 309 | 16 | 287 | 4.<br>4. | -0.05   |
| S102_1-17 | 128 | 373 | 0.34 | 0.0586 | 0.003<br>3     | 0.4444 | 0.019<br>8     | 0.047  | 0.000<br>7 | 552 | 0.000<br>19 | 373 | 86 | 296 | 5.<br>4. | 6.87    |
| S102_1-18 | 80  | 167 | 0.48 | 0.0063 | 0.002<br>1     | 0.0415 | 0.019<br>6     | 0.0465 | 0.000<br>7 | 412 | 0.000<br>8  | 41  | 19 | 293 | 4.<br>4. | -1.33   |
| S102_1-19 | 39  | 82  | 0.47 | 0.0511 | 0.001<br>9     | 0.3159 | 0.017<br>0.017 | 0.0453 | 0.000<br>7 | 247 | 0.000<br>91 | 279 | 13 | 286 | 2.<br>2. | -0.05   |
| S102_1-20 | 151 | 343 | 0.44 | 0.055  | 0.001<br>8     | 0.3312 | 0.007<br>0.01  | 0.0439 | 0.000<br>4 | 412 | 0.000<br>49 | 290 | 8  | 277 | 4.<br>2. | -0.14   |
| S102_1-21 | 318 | 765 | 0.42 | 0.054  | 0.002<br>2     | 0.3368 | 0.017<br>5     | 0.0452 | 0.000<br>4 | 369 | 0.000<br>30 | 295 | 6  | 285 | 5.<br>3. | 0.20    |
| S102_1-22 | 59  | 149 | 0.04 | 0.0552 | 0.002<br>8     | 0.3431 | 0.017<br>5     | 0.0451 | 0.000<br>6 | 421 | 0.000<br>86 | 299 | 13 | 285 | 7.<br>7. | 0.15    |
| S114-1    | 148 | 266 | 0.56 | 0.0506 | 0.001<br>6     | 0.3083 | 0.009<br>8     | 0.0442 | 0.000<br>4 | 223 | 0.000<br>51 | 273 | 8  | 279 | 2.<br>7  | 0.16    |
| S114-2    | 63  | 114 | 0.55 | 0.0529 | 0.003<br>1     | 0.3228 | 0.019<br>1     | 0.0444 | 0.000<br>8 | 324 | 0.000<br>95 | 284 | 15 | 280 | 5.<br>2. | 0.18    |
| S114-3    | 104 | 239 | 0.43 | 0.0552 | 0.003<br>4     | 0.3451 | 0.021<br>0.021 | 0.0454 | 0.000<br>4 | 419 | 0.000<br>14 | 301 | 16 | 286 | 6.<br>6. | -0.01   |

|         |     |     |      |        |                |        |                |        |            |     |          |     |    |     |         |       |
|---------|-----|-----|------|--------|----------------|--------|----------------|--------|------------|-----|----------|-----|----|-----|---------|-------|
| S114-4  | 89  | 211 | 0.42 | 0.0497 | 0.001<br>9     | 0.3013 | 0.011<br>6     | 0.0441 | 0.000<br>5 | 179 | 68       | 267 | 9  | 278 | 2.<br>8 | 0.17  |
| S114-5  | 78  | 187 | 0.42 | 0.0524 | 0.002<br>2     | 0.3172 | 0.012<br>7     | 0.0441 | 0.000<br>5 | 302 | 69       | 280 | 10 | 278 | 2.<br>9 | -0.03 |
| S114-6  | 84  | 187 | 0.45 | 0.0699 | 0.015<br>3     | 0.4342 | 0.110<br>1     | 0.0435 | 0.000<br>5 | 926 | 51<br>7  | 366 | 78 | 274 | 3.<br>2 | 2.83  |
| S114-7  | 117 | 372 | 0.31 | 0.0524 | 0.001<br>6     | 0.316  | 0.009<br>4     | 0.0439 | 0.000<br>4 | 304 | 46       | 279 | 7  | 277 | 2.<br>7 | 0.07  |
| S114-8  | 68  | 202 | 0.33 | 0.0528 | 0.002<br>3     | 0.3147 | 0.013<br>5     | 0.0435 | 0.000<br>6 | 321 | 69       | 278 | 10 | 274 | 3.<br>5 | 0.11  |
| S114-9  | 79  | 177 | 0.45 | 0.0565 | 0.002<br>3     | 0.344  | 0.014<br>1     | 0.0441 | 0.000<br>5 | 471 | 69       | 300 | 11 | 278 | 2.<br>9 | 0.16  |
| S114-10 | 161 | 582 | 0.28 | 0.0513 | 0.001<br>3     | 0.3109 | 0.008<br>1     | 0.044  | 0.000<br>4 | 252 | 41       | 275 | 6  | 277 | 2.<br>4 | 0.25  |
| S114-11 | 77  | 173 | 0.45 | 0.0589 | 0.002<br>5     | 0.3524 | 0.014<br>3     | 0.0439 | 0.000<br>5 | 563 | 66       | 307 | 11 | 277 | 3.<br>3 | -0.03 |
| S114-12 | 95  | 170 | 0.56 | 0.0573 | 0.003<br>0.002 | 0.325  | 0.015<br>1     | 0.0422 | 0.000<br>6 | 502 | 75       | 286 | 12 | 267 | 5.<br>3 | -0.29 |
| S114-13 | 101 | 172 | 0.58 | 0.0549 | 0.002<br>7     | 0.3237 | 0.015<br>5     | 0.0431 | 0.000<br>5 | 410 | 82       | 285 | 12 | 272 | 3.<br>2 | 0.01  |
| S114-14 | 112 | 230 | 0.49 | 0.051  | 0.002<br>2     | 0.3054 | 0.013<br>0.008 | 0.0438 | 0.000<br>5 | 240 | 72       | 271 | 10 | 276 | 3.<br>2 | 0.08  |
| S114-15 | 341 | 643 | 0.53 | 0.0516 | 0.001<br>5     | 0.307  | 0.018<br>9     | 0.0431 | 0.000<br>4 | 269 | 45<br>14 | 272 | 7  | 272 | 6.<br>3 | 0.15  |
| S114-16 | 91  | 215 | 0.42 | 0.0521 | 0.003<br>2     | 0.3119 | 0.018<br>9     | 0.0435 | 0.000<br>6 | 288 | 4        | 276 | 15 | 274 | 3.<br>5 | 0.05  |
| S114-17 | 109 | 248 | 0.44 | 0.0542 | 0.002<br>1     | 0.3182 | 0.012<br>1     | 0.0429 | 0.000<br>5 | 377 | 60       | 281 | 9  | 271 | 3.<br>1 | 0.09  |
| S114-18 | 101 | 205 | 0.05 | 0.0509 | 0.002<br>0.002 | 0.3102 | 0.012<br>5     | 0.044  | 0.000<br>5 | 238 | 69       | 274 | 10 | 277 | 3.<br>3 | 0.23  |
| S114-19 | 49  | 140 | 0.35 | 0.0545 | 0.003<br>4     | 0.3379 | 0.015<br>4     | 0.0449 | 0.000<br>5 | 392 | 79<br>15 | 296 | 12 | 283 | 1.<br>1 | 0.26  |
| S114-20 | 69  | 166 | 0.42 | 0.0542 | 0.003<br>6     | 0.3228 | 0.021<br>1     | 0.0432 | 0.000<br>5 | 380 | 3        | 284 | 16 | 273 | 3       | 0.00  |

*Yu et al. (2011b)*

| Spot | <sup>206</sup> Pb <sub>c</sub> % | U<br>(ppm) | Th<br>(ppm) | Th/U | <sup>206</sup> Pb* | <sup>206</sup> Pb/ <sup>238</sup> U<br>(Ma) | 1σ  | <sup>207</sup> Pb/ <sup>235</sup> U | 1σ    | <sup>206</sup> Pb/ <sup>238</sup> U | 1σ     | RHO   |
|------|----------------------------------|------------|-------------|------|--------------------|---------------------------------------------|-----|-------------------------------------|-------|-------------------------------------|--------|-------|
| 1.1  | 6.18                             | 125        | 67          | 0.56 | 4.96               | 272.9                                       | 6.2 | 0.229                               | 0.055 | 0.0432                              | 0.0008 | 0.078 |
| 2.1  | 4.54                             | 175        | 110         | 0.65 | 7.41               | 296.4                                       | 5.4 | 0.333                               | 0.047 | 0.0471                              | 0.0007 | 0.104 |
| 3.1  | 4.45                             | 125        | 67          | 0.55 | 5.12               | 287.4                                       | 5.3 | 0.329                               | 0.036 | 0.0456                              | 0.0007 | 0.142 |
| 4.1  | 3.21                             | 146        | 87          | 0.61 | 5.72               | 277.5                                       | 4.8 | 0.348                               | 0.026 | 0.044                               | 0.0006 | 0.191 |
| 5.1  | 2.5                              | 157        | 101         | 0.66 | 6.46               | 294.9                                       | 4.5 | 0.351                               | 0.021 | 0.0468                              | 0.0006 | 0.208 |
| 6.1  | 4.58                             | 116        | 81          | 0.72 | 4.72               | 284.7                                       | 5.1 | 0.357                               | 0.039 | 0.0452                              | 0.0006 | 0.124 |
| 7.1  | 4.16                             | 149        | 89          | 0.62 | 6.05               | 285.9                                       | 5.5 | 0.315                               | 0.05  | 0.0454                              | 0.0006 | 0.088 |
| 8.1  | 0.69                             | 164        | 112         | 0.7  | 6.11               | 271.8                                       | 5.3 | 0.397                               | 0.03  | 0.0431                              | 0.0006 | 0.188 |
| 9.1  | 2.24                             | 147        | 87          | 0.61 | 5.94               | 289.7                                       | 5.1 | 0.313                               | 0.021 | 0.046                               | 0.0007 | 0.23  |
| 10.1 | 4.02                             | 187        | 118         | 0.65 | 7.42               | 279.1                                       | 4.4 | 0.263                               | 0.047 | 0.0442                              | 0.0006 | 0.071 |
| 11.1 | 3.58                             | 143        | 88          | 0.64 | 5.66               | 280.4                                       | 4.7 | 0.319                               | 0.028 | 0.0445                              | 0.0006 | 0.159 |
| 12.1 | 3.84                             | 165        | 114         | 0.71 | 6.7                | 286.9                                       | 4.9 | 0.339                               | 0.034 | 0.0455                              | 0.0006 | 0.131 |
| 13.1 | 4.25                             | 172        | 105         | 0.63 | 7.01               | 287                                         | 5.1 | 0.345                               | 0.038 | 0.0455                              | 0.0006 | 0.12  |
| 14.1 | 5.07                             | 143        | 79          | 0.57 | 5.94               | 289.4                                       | 5.2 | 0.295                               | 0.038 | 0.0459                              | 0.0006 | 0.112 |
| 15.1 | 3.4                              | 186        | 81          | 0.45 | 7.33               | 279.7                                       | 5.2 | 0.291                               | 0.038 | 0.0443                              | 0.0006 | 0.105 |
| 16.1 | 4.51                             | 171        | 106         | 0.64 | 6.96               | 284.7                                       | 4.8 | 0.275                               | 0.033 | 0.0452                              | 0.0006 | 0.109 |
| 17.1 | 2.4                              | 153        | 103         | 0.69 | 6.06               | 283                                         | 4.8 | 0.382                               | 0.023 | 0.0449                              | 0.0006 | 0.24  |
| 18.1 | 2.23                             | 184        | 107         | 0.6  | 7.26               | 282.8                                       | 4.2 | 0.357                               | 0.02  | 0.0448                              | 0.0006 | 0.229 |
| 19.1 | 3.14                             | 157        | 103         | 0.68 | 6.09               | 276                                         | 4.7 | 0.356                               | 0.039 | 0.0437                              | 0.0006 | 0.129 |
| 20.1 | 5.07                             | 112        | 69          | 0.64 | 4.64               | 289                                         | 5.8 | 0.404                               | 0.053 | 0.0459                              | 0.0007 | 0.129 |
| 21.1 | 0.77                             | 264        | 206         | 0.81 | 10.2               | 282                                         | 4.1 | 0.346                               | 0.013 | 0.0447                              | 0.0005 | 0.321 |

Li et al. (2011)

| Spot  | Pb<br>ppm | Th<br>ppm | U<br>ppm | Th/U | Isotope ratio                             |       |                                          |       |                                          |       | Age (Ma)                                  |       |                                          |      | RHO    |                                          |      |  |
|-------|-----------|-----------|----------|------|-------------------------------------------|-------|------------------------------------------|-------|------------------------------------------|-------|-------------------------------------------|-------|------------------------------------------|------|--------|------------------------------------------|------|--|
|       |           |           |          |      | <sup>207</sup> Pb/ <sup>206</sup> Pb<br>b | 1σ    | <sup>207</sup> Pb/ <sup>235</sup> U<br>U | 1σ    | <sup>206</sup> Pb/ <sup>238</sup> U<br>U | 1σ    | <sup>207</sup> Pb/ <sup>206</sup> Pb<br>b | 1σ    | <sup>207</sup> Pb/ <sup>235</sup> U<br>U | 1σ   |        | <sup>206</sup> Pb/ <sup>238</sup> U<br>U | 1σ   |  |
| KP-02 |           |           |          |      |                                           | 0.002 |                                          | 0.117 |                                          | 0.004 |                                           |       |                                          |      |        |                                          |      |  |
| 1     | 44        | 90        | 87       | 1.03 | 0.1162                                    | 4     | 5.7687                                   | 3     | 0.3599                                   | 5     | 1899                                      | 36.1  | 1941.7                                   | 17.6 | 1981.8 | 21.2                                     | 0.28 |  |
| 2     | 20        | 149       | 350      | 0.43 | 0.0545                                    | 7     | 0.3528                                   | 8     | 0.0469                                   | 6     | 393                                       | 67.4  | 306.9                                    | 8.1  | 295.6  | 3.8                                      | 0.16 |  |
| 3     | 8         | 65        | 127      | 0.51 | 0.0582                                    | 1     | 0.3596                                   | 9     | 0.0448                                   | 6     | 535.4                                     | 280   | 311.9                                    | 36.5 | 282.7  | 9.8                                      | 0.04 |  |
| 4     | 9         | 80        | 153      | 0.52 | 0.0583                                    | 8     | 0.3767                                   | 2     | 0.0469                                   | 9     | 540.2                                     | 138.4 | 324.6                                    | 17.9 | 295.2  | 5.6                                      | 0.10 |  |
| 5     | 7         | 53        | 67       | 0.79 | 0.0598                                    | 2     | 0.6727                                   | 3     | 0.0816                                   | 7     | 595.1                                     | 146.2 | 522.4                                    | 28.1 | 505.7  | 10                                       | 0.08 |  |
| 6     | 8         | 56        | 133      | 0.42 | 0.0561                                    | 5     | 0.3644                                   | 9     | 0.0471                                   | 2     | 454.8                                     | 204.8 | 315.5                                    | 26   | 296.8  | 7.5                                      | 0.04 |  |
| 7     | 56        | 280       | 345      | 0.81 | 0.0647                                    | 3     | 1.1187                                   | 0.023 | 0.1254                                   | 5     | 763.7                                     | 42.8  | 762.3                                    | 11   | 761.7  | 8.7                                      | 0.33 |  |
| 8     | 7         | 56        | 119      | 0.47 | 0.0522                                    | 6     | 0.3337                                   | 6     | 0.0464                                   | 7     | 293.7                                     | 111.5 | 292.4                                    | 12.6 | 292.2  | 4.5                                      | 0.15 |  |
| 9     | 10        | 99        | 154      | 0.64 | 0.055                                     | 4     | 0.361                                    | 4     | 0.0476                                   | 2     | 411.2                                     | 374.1 | 313                                      | 49.5 | 299.9  | 13.4                                     | 0.01 |  |
| 10    | 42        | 412       | 727      | 0.57 | 0.0523                                    | 2     | 0.335                                    | 7     | 0.0465                                   | 6     | 296.4                                     | 51.4  | 293.4                                    | 5.8  | 292.9  | 3.5                                      | 0.28 |  |
| 11    | 10        | 88        | 177      | 0.50 | 0.0562                                    | 4     | 0.3601                                   | 8     | 0.0464                                   | 7     | 460.9                                     | 91.1  | 312.3                                    | 11.1 | 292.6  | 4.2                                      | 0.08 |  |
| 12    | 36        | 467       | 620      | 0.75 | 0.0564                                    | 8     | 0.3604                                   | 6     | 0.0463                                   | 6     | 468.7                                     | 70.9  | 312.5                                    | 8.7  | 291.8  | 3.8                                      | 0.22 |  |
| 13    | 9         | 77        | 160      | 0.48 | 0.0563                                    | 2     | 0.3554                                   | 8     | 0.0458                                   | 7     | 462.9                                     | 86    | 308.8                                    | 10.3 | 288.6  | 4.1                                      | 0.18 |  |
| 14    | 8         | 70        | 138      | 0.51 | 0.0561                                    | 3     | 0.3571                                   | 2     | 0.0462                                   | 8     | 456                                       | 123.8 | 310.1                                    | 15.1 | 290.9  | 5                                        | 0.02 |  |
| 15    | 28        | 323       | 463      | 0.70 | 0.0547                                    | 7     | 0.3487                                   | 7     | 0.0463                                   | 6     | 398.8                                     | 67.7  | 303.7                                    | 8.1  | 291.5  | 3.8                                      | 0.18 |  |
| 16    | 32        | 278       | 589      | 0.47 | 0.0582                                    | 4     | 0.369                                    | 6     | 0.046                                    | 6     | 535.9                                     | 51.1  | 318.9                                    | 6.4  | 289.9  | 3.5                                      | 0.22 |  |
| 17    | 6         | 62        | 108      | 0.57 | 0.0557                                    | 0.006 | 0.3594                                   | 0.038 | 0.0468                                   | 3     | 441.5                                     | 224.8 | 311.7                                    | 28.4 | 294.6  | 8                                        | 0.06 |  |
| 18    | 68        | 490       | 1274     | 0.38 | 0.0519                                    | 1     | 0.3292                                   | 8     | 0.046                                    | 6     | 281.5                                     | 46.7  | 288.9                                    | 5.2  | 289.8  | 3.4                                      | 0.27 |  |
| 19    | 7         | 63        | 119      | 0.53 | 0.0575                                    | 2     | 0.3705                                   | 5     | 0.0468                                   | 5     | 508.6                                     | 255.9 | 320                                      | 33.7 | 294.6  | 9.3                                      | 0.05 |  |
| 20    | 3         | 25        | 47       | 0.53 | 0.0554                                    | 0.01  | 0.3507                                   | 9     | 0.0459                                   | 0.002 | 426.5                                     | 359.7 | 305.3                                    | 46.5 | 289.6  | 12.4                                     | 0.03 |  |

KP-04

|    |     |     |      |      |        |       |        |       |        |       |        |       |        |      |        |      |      |
|----|-----|-----|------|------|--------|-------|--------|-------|--------|-------|--------|-------|--------|------|--------|------|------|
| 1  | 19  | 180 | 314  | 0.57 | 0.0595 | 0.003 | 0.7291 | 0.036 | 0.0889 | 0.001 | 584.6  | 105.2 | 556    | 21.1 | 549    | 8.3  | 0.09 |
| 2  | 18  | 145 | 296  | 0.49 | 0.0748 | 0.003 | 1.4314 | 0.055 | 0.1388 | 0.002 | 1062.4 | 77.4  | 902.1  | 23.1 | 838    | 12.3 | 0.11 |
| 3  | 6   | 49  | 108  | 0.45 | 0.0731 | 0.002 | 1.3922 | 0.045 | 0.1381 | 0.002 | 1016.6 | 66.3  | 885.6  | 19.4 | 834    | 11.2 | 0.22 |
| 4  | 22  | 198 | 176  | 1.13 | 0.0504 | 0.007 | 0.334  | 0.049 | 0.048  | 0.000 | 214.2  | 312.7 | 292.6  | 37.8 | 302.5  | 5.5  | 0.05 |
| 5  | 181 | 512 | 1258 | 0.41 | 0.0535 | 0.003 | 0.3484 | 0.022 | 0.0472 | 0.000 | 349.8  | 141   | 303.5  | 16.8 | 297.4  | 5.6  | 0.07 |
| 6  | 77  | 196 | 471  | 0.42 | 0.0536 | 0.005 | 0.3449 | 0.020 | 0.0466 | 0.000 | 355.2  | 130.8 | 300.9  | 15.6 | 293.9  | 4.6  | 0.03 |
| 7  | 19  | 67  | 112  | 0.60 | 0.1255 | 0.005 | 3.3057 | 0.133 | 0.191  | 0.003 | 2036.3 | 72.2  | 1482.4 | 31.6 | 1126.5 | 18.5 | 0.12 |
| 8  | 55  | 218 | 278  | 0.78 | 0.1512 | 0.002 | 4.2538 | 0.138 | 0.204  | 0.003 | 2359.4 | 56    | 1684.5 | 26.8 | 1196.9 | 17   | 0.16 |
| 9  | 35  | 71  | 128  | 0.55 | 0.0699 | 0.003 | 1.4794 | 0.048 | 0.1536 | 0.002 | 923.8  | 67.1  | 922    | 19.9 | 921.1  | 12.3 | 0.21 |
| 10 | 167 | 134 | 416  | 0.32 | 0.0997 | 0.005 | 3.867  | 0.121 | 0.2811 | 0.004 | 1619.3 | 58.4  | 1606.8 | 25.4 | 1597   | 20.4 | 0.18 |
| 11 | 58  | 75  | 199  | 0.38 | 0.1841 | 0.005 | 2.9154 | 0.080 | 0.1148 | 0.001 | 2690.2 | 45.5  | 1385.9 | 20.8 | 700.7  | 9.1  | 0.20 |

K-03

|    |     |     |     |      |        |       |        |       |        |       |        |       |        |      |        |      |      |
|----|-----|-----|-----|------|--------|-------|--------|-------|--------|-------|--------|-------|--------|------|--------|------|------|
| 1  | 131 | 118 | 210 | 0.56 | 0.1645 | 0.004 | 10.602 | 0.263 | 0.4674 | 0.006 | 2502.3 | 41.38 | 2488.9 | 23.0 | 2472   | 4    | 0.29 |
| 2  | 27  | 170 | 162 | 1.05 | 0.0654 | 0.003 | 1.119  | 0.050 | 0.1241 | 0.002 | 787.4  | 93.64 | 762.5  | 24.1 | 753.9  | 11.5 | 0.13 |
| 3  | 161 | 292 | 393 | 0.74 | 0.1408 | 0.003 | 6.4124 | 0.139 | 0.3303 | 0.004 | 2236.7 | 37.22 | 2034   | 19.1 | 1839.9 | 21.0 | 0.28 |
| 4  | 60  | 206 | 404 | 0.51 | 0.0665 | 0.001 | 1.2278 | 0.031 | 0.1338 | 0.001 | 823.2  | 52.1  | 813.3  | 14.1 | 809.6  | 9.78 | 0.23 |
| 5  | 112 | 103 | 273 | 0.38 | 0.1646 | 0.003 | 7.5531 | 0.163 | 0.3327 | 0.004 | 2503.8 | 36.05 | 2179.3 | 19.4 | 1851.4 | 21.3 | 0.29 |
| 6  | 11  | 111 | 55  | 2.02 | 0.0655 | 0.003 | 1.1763 | 0.066 | 0.1303 | 0.002 | 790    | 116.4 | 789.6  | 30.9 | 789.3  | 7    | 0.07 |
| 7  | 37  | 200 | 185 | 1.08 | 0.0672 | 0.004 | 1.4425 | 0.083 | 0.1557 | 0.003 | 843    | 118.1 | 906.8  | 3    | 789.3  | 13.9 | 0.07 |
| 8  | 32  | 206 | 181 | 1.14 | 0.0657 | 0.002 | 1.185  | 0.044 | 0.1309 | 0.003 | 795.4  | 77.77 | 793.6  | 20.6 | 933    | 2    | 0.16 |
| 9  | 12  | 171 | 205 | 0.83 | 0.0536 | 0.002 | 0.3421 | 0.017 | 0.0463 | 0.000 | 352.1  | 114.6 | 298.8  | 13.4 | 792.8  | 1    | 0.13 |
| 10 | 75  | 220 | 490 | 0.45 | 0.0851 | 0.002 | 1.4577 | 0.037 | 0.1242 | 0.001 | 1317.9 | 1     | 913.1  | 15.4 | 291.9  | 4.54 | 0.23 |
| 11 | 15  | 144 | 181 | 0.80 | 0.055  | 0.003 | 0.4838 | 0.026 | 0.0638 | 0.001 | 411.4  | 49.34 | 400.7  | 17.8 | 754.7  | 9.39 | 0.23 |
| 12 | 46  | 87  | 101 | 0.86 | 0.1183 | 0.002 | 5.6633 | 0.120 | 0.3472 | 0.004 | 1930.2 | 37.45 | 1925.8 | 18.3 | 398.7  | 6.47 | 0.12 |
|    |     |     |     |      |        |       |        |       |        |       |        |       |        | 6    | 1921.4 | 6    | 0.31 |

|    |    |     |     |      |        |                |        |            |        |            |       |            |       |              |       |             |      |
|----|----|-----|-----|------|--------|----------------|--------|------------|--------|------------|-------|------------|-------|--------------|-------|-------------|------|
| 13 | 10 | 86  | 106 | 0.81 | 0.0568 | 0.003<br>7     | 0.5557 | 0.035<br>2 | 0.071  | 0.001<br>4 | 482.4 | 137.5<br>5 | 448.7 | 22.9<br>8    | 441.9 | 8.11        | 0.06 |
| 14 | 45 | 150 | 828 | 0.18 | 0.0515 | 0.002<br>0.001 | 0.3331 | 0.012<br>8 | 0.0469 | 0.000<br>7 | 265.1 | 86.86      | 292   | 9.74<br>15.3 | 295.3 | 4.1<br>10.5 | 0.17 |
| 15 | 53 | 190 | 301 | 0.63 | 0.0682 | 8              | 1.3517 | 6          | 0.1436 | 9          | 875.7 | 53.86      | 868.3 | 6            | 865.2 | 7           | 0.25 |
| 16 | 40 | 345 | 461 | 0.75 | 0.0691 | 0.005          | 0.6261 | 0.044<br>4 | 0.0657 | 0.001<br>5 | 901   | 143.5<br>5 | 493.7 | 27.7<br>4    | 410.3 | 8.78        | 0.10 |

Zhang *et al.* (2012)

| Spot                           | Th<br>ppm | U<br>ppm | Th/U | Isotope ratio                        |        |                                     |        |                                     |        | Age (Ma)                            |    |                                      |    | RHO   |
|--------------------------------|-----------|----------|------|--------------------------------------|--------|-------------------------------------|--------|-------------------------------------|--------|-------------------------------------|----|--------------------------------------|----|-------|
|                                |           |          |      | <sup>207</sup> Pb/ <sup>206</sup> Pb | 1σ     | <sup>207</sup> Pb/ <sup>235</sup> U | 1σ     | <sup>206</sup> Pb/ <sup>238</sup> U | 1σ     | <sup>207</sup> Pb/ <sup>235</sup> U | 1σ | <sup>207</sup> Pb/ <sup>206</sup> Pb | 1σ |       |
| <b>09KZ05 (Kezile pluton)</b>  |           |          |      |                                      |        |                                     |        |                                     |        |                                     |    |                                      |    |       |
| 1                              | 327       | 468      | 0.7  | 0.0531                               | 0.001  | 0.3181                              | 0.006  | 0.0435                              | 0.0002 | 280                                 | 5  | 274                                  | 1  | 0.13  |
| 2                              | 350       | 513      | 0.68 | 0.0533                               | 0.0017 | 0.3152                              | 0.011  | 0.0429                              | 0.0003 | 278                                 | 10 | 271                                  | 2  | 0.51  |
| 3                              | 160       | 278      | 0.58 | 0.0514                               | 0.0021 | 0.3129                              | 0.0147 | 0.0441                              | 0.0004 | 276                                 | 13 | 278                                  | 2  | 0.73  |
| 4                              | 431       | 737      | 0.59 | 0.0529                               | 0.0007 | 0.3208                              | 0.0045 | 0.044                               | 0.0003 | 282                                 | 4  | 277                                  | 2  | 0.36  |
| 5                              | 301       | 440      | 0.68 | 0.0533                               | 0.0012 | 0.3233                              | 0.0073 | 0.044                               | 0.0003 | 284                                 | 6  | 278                                  | 2  | 0.16  |
| 6                              | 321       | 607      | 0.53 | 0.0534                               | 0.001  | 0.3258                              | 0.006  | 0.0443                              | 0.0002 | 286                                 | 5  | 279                                  | 2  | 0.05  |
| 7                              | 695       | 852      | 0.82 | 0.0535                               | 0.0007 | 0.3217                              | 0.0044 | 0.0436                              | 0.0002 | 283                                 | 4  | 275                                  | 1  | 0.29  |
| 8                              | 325       | 600      | 0.54 | 0.0536                               | 0.001  | 0.3274                              | 0.0064 | 0.0443                              | 0.0003 | 288                                 | 6  | 279                                  | 2  | 0.30  |
| 9                              | 852       | 788      | 1.08 | 0.053                                | 0.0008 | 0.3209                              | 0.0044 | 0.0439                              | 0.0003 | 283                                 | 4  | 277                                  | 2  | 0.04  |
| 10                             | 380       | 658      | 0.58 | 0.0535                               | 0.0009 | 0.3161                              | 0.0052 | 0.0429                              | 0.0003 | 279                                 | 5  | 271                                  | 2  | 0.16  |
| 11                             | 322       | 590      | 0.55 | 0.0533                               | 0.001  | 0.3142                              | 0.0068 | 0.0428                              | 0.0004 | 277                                 | 6  | 270                                  | 2  | 0.50  |
| 12                             | 296       | 445      | 0.66 | 0.0528                               | 0.0011 | 0.3205                              | 0.0068 | 0.044                               | 0.0003 | 282                                 | 6  | 278                                  | 2  | 0.22  |
| 13                             | 447       | 758      | 0.59 | 0.0532                               | 0.0007 | 0.3208                              | 0.0046 | 0.0437                              | 0.0003 | 283                                 | 4  | 276                                  | 2  | 0.40  |
| 14                             | 450       | 731      | 0.62 | 0.0523                               | 0.0008 | 0.3191                              | 0.0052 | 0.0443                              | 0.0003 | 281                                 | 5  | 279                                  | 2  | 0.35  |
| 15                             | 383       | 578      | 0.66 | 0.0512                               | 0.0008 | 0.3139                              | 0.0051 | 0.0444                              | 0.0003 | 277                                 | 5  | 280                                  | 2  | 0.30  |
| 16                             | 448       | 766      | 0.59 | 0.0535                               | 0.0007 | 0.328                               | 0.0045 | 0.0445                              | 0.0003 | 288                                 | 4  | 281                                  | 2  | 0.34  |
| 17                             | 501       | 755      | 0.66 | 0.0533                               | 0.0007 | 0.3233                              | 0.0047 | 0.044                               | 0.0003 | 284                                 | 4  | 278                                  | 2  | 0.43  |
| 18                             | 729       | 863      | 0.84 | 0.0537                               | 0.0009 | 0.3224                              | 0.0057 | 0.0435                              | 0.0002 | 284                                 | 5  | 275                                  | 1  | 0.32  |
| 19                             | 602       | 866      | 0.69 | 0.0534                               | 0.0007 | 0.3261                              | 0.0044 | 0.0443                              | 0.0003 | 287                                 | 4  | 279                                  | 2  | 0.31  |
| 20                             | 647       | 841      | 0.77 | 0.0523                               | 0.0011 | 0.3086                              | 0.0073 | 0.0428                              | 0.0002 | 273                                 | 6  | 270                                  | 1  | 0.63  |
| 21                             | 566       | 807      | 0.7  | 0.0515                               | 0.0008 | 0.3105                              | 0.0049 | 0.0437                              | 0.0002 | 275                                 | 4  | 276                                  | 1  | 0.20  |
| 22                             | 661       | 956      | 0.69 | 0.0529                               | 0.0006 | 0.318                               | 0.0038 | 0.0436                              | 0.0002 | 280                                 | 3  | 275                                  | 1  | 0.32  |
| 23                             | 687       | 105      | 0.65 | 0.0522                               | 0.0006 | 0.3151                              | 0.0038 | 0.0438                              | 0.0002 | 278                                 | 3  | 276                                  | 1  | 0.31  |
| 24                             | 499       | 742      | 0.67 | 0.0527                               | 0.0009 | 0.316                               | 0.0056 | 0.0435                              | 0.0002 | 279                                 | 5  | 274                                  | 1  | 0.27  |
| 25                             | 287       | 391      | 0.73 | 0.051                                | 0.0012 | 0.3074                              | 0.0077 | 0.0437                              | 0.0002 | 272                                 | 7  | 276                                  | 1  | 0.41  |
| <b>09GL07(Guerlale pluton)</b> |           |          |      |                                      |        |                                     |        |                                     |        |                                     |    |                                      |    |       |
| 1                              | 285       | 384      | 0.74 | 0.0513                               | 0.0015 | 0.3037                              | 0.009  | 0.0429                              | 0.0002 | 269                                 | 8  | 271                                  | 1  | 0.16  |
| 2                              | 76        | 110      | 0.69 | 0.051                                | 0.0041 | 0.3064                              | 0.0245 | 0.0435                              | 0.0003 | 271                                 | 22 | 274                                  | 2  | -0.02 |

|    |     |     |      |        |        |        |        |        |        |     |    |     |   |       |
|----|-----|-----|------|--------|--------|--------|--------|--------|--------|-----|----|-----|---|-------|
| 3  | 16  | 209 | 0.77 | 0.0958 | 0.0022 | 0.6731 | 0.0168 | 0.0508 | 0.0002 | 523 | 13 | 319 | 2 | 0.57  |
| 4  | 83  | 128 | 0.65 | 0.0526 | 0.0031 | 0.3161 | 0.0187 | 0.0436 | 0.0002 | 279 | 16 | 275 | 1 | 0.09  |
| 5  | 87  | 115 | 0.76 | 0.0531 | 0.004  | 0.3128 | 0.0237 | 0.0427 | 0.0003 | 276 | 21 | 270 | 2 | 0.11  |
| 6  | 68  | 100 | 0.68 | 0.0516 | 0.0044 | 0.3125 | 0.0266 | 0.0433 | 0.0003 | 276 | 24 | 273 | 2 | 0.02  |
| 7  | 106 | 122 | 0.87 | 0.0495 | 0.004  | 0.2934 | 0.0239 | 0.0428 | 0.0002 | 261 | 21 | 270 | 1 | 0.17  |
| 8  | 73  | 131 | 0.56 | 0.0526 | 0.0038 | 0.317  | 0.0234 | 0.0437 | 0.0003 | 280 | 21 | 276 | 2 | 0.27  |
| 9  | 662 | 481 | 1.38 | 0.053  | 0.0013 | 0.3135 | 0.0078 | 0.0429 | 0.0001 | 277 | 7  | 271 | 1 | 0.20  |
| 10 | 240 | 360 | 0.67 | 0.0542 | 0.0023 | 0.3149 | 0.0132 | 0.0421 | 0.0001 | 278 | 12 | 266 | 1 | -0.19 |
| 11 | 125 | 176 | 0.71 | 0.0458 | 0.0037 | 0.2731 | 0.0221 | 0.0432 | 0.0002 | 245 | 20 | 272 | 1 | 0.06  |
| 12 | 253 | 262 | 0.97 | 0.0513 | 0.002  | 0.2999 | 0.012  | 0.0423 | 0.0001 | 266 | 11 | 267 | 1 | 0.46  |
| 13 | 35  | 71  | 0.5  | 0.0831 | 0.0075 | 0.4993 | 0.0448 | 0.043  | 0.0004 | 411 | 37 | 272 | 2 | 0.00  |
| 14 | 73  | 119 | 0.61 | 0.0521 | 0.0039 | 0.3113 | 0.0235 | 0.0431 | 0.0002 | 275 | 21 | 272 | 1 | 0.17  |
| 15 | 198 | 421 | 0.47 | 0.0857 | 0.0015 | 0.5127 | 0.0099 | 0.0432 | 0.0002 | 420 | 8  | 273 | 1 | 0.49  |
| 16 | 132 | 219 | 0.6  | 0.0524 | 0.002  | 0.2933 | 0.0113 | 0.0406 | 0.0001 | 261 | 10 | 257 | 1 | 0.18  |
| 17 | 97  | 136 | 0.71 | 0.0533 | 0.0047 | 0.3133 | 0.0276 | 0.0425 | 0.0002 | 277 | 24 | 268 | 1 | 0.01  |
| 18 | 83  | 101 | 0.83 | 0.0537 | 0.0043 | 0.3174 | 0.0261 | 0.0429 | 0.0003 | 280 | 23 | 271 | 2 | 0.35  |
| 19 | 603 | 447 | 1.35 | 0.0534 | 0.001  | 0.3204 | 0.006  | 0.0435 | 0.0001 | 282 | 5  | 275 | 1 | 0.06  |

**2010HLJ V-2 (Halajun pluton V)**

|    |     |     |      |        |      |      |        |        |        |     |    |     |   |       |
|----|-----|-----|------|--------|------|------|--------|--------|--------|-----|----|-----|---|-------|
| 1  | 246 | 542 | 0.45 | 0.0074 | 2.2  | 0.83 | 0.3386 | 0.046  | 0.0004 | 296 | 7  | 290 | 2 | ##### |
| 2  | 271 | 833 | 0.32 | 0.0064 | 2.06 | 0.8  | 0.3089 | 0.0429 | 0.0003 | 273 | 6  | 271 | 2 | ##### |
| 3  | 82  | 329 | 0.25 | 0.0053 | 2.84 | 1.01 | 0.1857 | 0.0249 | 0.0003 | 173 | 5  | 159 | 2 | ##### |
| 4  | 318 | 963 | 0.33 | 0.0068 | 2.06 | 0.83 | 0.3316 | 0.0457 | 0.0004 | 291 | 6  | 288 | 2 | ##### |
| 5  | 286 | 687 | 0.42 | 0.0068 | 2.28 | 0.83 | 0.2958 | 0.0402 | 0.0003 | 263 | 6  | 254 | 2 | ##### |
| 6  | 157 | 381 | 0.41 | 0.0077 | 2.43 | 0.83 | 0.3152 | 0.0436 | 0.0004 | 278 | 7  | 275 | 2 | ##### |
| 7  | 71  | 189 | 0.38 | 0.0115 | 3.62 | 0.92 | 0.3167 | 0.0432 | 0.0004 | 279 | 10 | 273 | 2 | ##### |
| 8  | 99  | 235 | 0.42 | 0.0087 | 3.09 | 0.89 | 0.2831 | 0.0406 | 0.0004 | 253 | 8  | 256 | 2 | ##### |
| 9  | 251 | 689 | 0.36 | 0.0061 | 2.06 | 0.89 | 0.2985 | 0.043  | 0.0004 | 265 | 5  | 272 | 2 | ##### |
| 10 | 103 | 272 | 0.38 | 0.0085 | 2.69 | 0.9  | 0.3177 | 0.0424 | 0.0004 | 280 | 8  | 268 | 2 | ##### |
| 11 | 87  | 230 | 0.38 | 0.0102 | 3.18 | 1.01 | 0.3224 | 0.042  | 0.0004 | 284 | 9  | 265 | 3 | ##### |
| 12 | 259 | 580 | 0.45 | 0.0063 | 2.25 | 0.83 | 0.2803 | 0.0393 | 0.0003 | 251 | 6  | 248 | 2 | ##### |
| 13 | 132 | 451 | 0.29 | 0.0069 | 2.21 | 0.86 | 0.3112 | 0.0433 | 0.0004 | 275 | 6  | 273 | 2 | ##### |



|    |     |     |      |        |      |      |        |        |        |     |   |     |   |       |
|----|-----|-----|------|--------|------|------|--------|--------|--------|-----|---|-----|---|-------|
| 14 | 226 | 472 | 0.48 | 0.0081 | 2.59 | 1.25 | 0.3115 | 0.0429 | 0.0005 | 275 | 7 | 271 | 3 | ##### |
| 15 | 248 | 674 | 0.37 | 0.0063 | 2.01 | 0.81 | 0.3116 | 0.0429 | 0.0003 | 275 | 6 | 271 | 2 | ##### |

**2010HLJ IV-3 (Pluton IV)**

|    |     |     |      |        |        |        |        |        |        |       |     |       |     |       |
|----|-----|-----|------|--------|--------|--------|--------|--------|--------|-------|-----|-------|-----|-------|
| 1  | 124 | 125 | 0.99 | 0.0529 | 0.0005 | 0.3106 | 0.0041 | 0.0426 | 0.0004 | 274.7 | 3.1 | 269   | 2.4 | 0.70  |
| 2  | 31  | 48  | 0.64 | 0.0536 | 0.0011 | 0.3164 | 0.0066 | 0.0429 | 0.0004 | 279.1 | 5.1 | 271   | 2.7 | 0.26  |
| 3  | 38  | 50  | 0.76 | 0.053  | 0.001  | 0.3088 | 0.0062 | 0.0423 | 0.0004 | 273.3 | 4.8 | 267.2 | 2.7 | 0.36  |
| 4  | 60  | 83  | 0.72 | 0.0523 | 0.0016 | 0.2975 | 0.0098 | 0.0413 | 0.0005 | 264.4 | 7.7 | 260.6 | 3.2 | 0.37  |
| 5  | 67  | 83  | 0.8  | 0.0511 | 0.0039 | 0.2765 | 0.0304 | 0.0392 | 0.0013 | 248   | 24  | 247.7 | 8.3 | 1.01  |
| 6  | 32  | 49  | 0.65 | 0.0471 | 0.0029 | 0.2603 | 0.0148 | 0.04   | 0.0003 | 234.5 | 11  | 253.1 | 1.9 | -0.59 |
| 7  | 50  | 57  | 0.87 | 0.0537 | 0.0009 | 0.3175 | 0.0057 | 0.0429 | 0.0004 | 280   | 4.4 | 271.1 | 2.3 | 0.38  |
| 8  | 77  | 98  | 0.78 | 0.0509 | 0.0006 | 0.2988 | 0.0044 | 0.0425 | 0.0004 | 265.4 | 3.4 | 268.4 | 2.2 | 0.60  |
| 9  | 245 | 274 | 0.89 | 0.0524 | 0.0004 | 0.3112 | 0.0045 | 0.0431 | 0.0006 | 275.1 | 3.5 | 272   | 3.7 | 0.86  |
| 10 | 150 | 142 | 1.06 | 0.0521 | 0.0005 | 0.3073 | 0.0055 | 0.0428 | 0.0006 | 272.1 | 4.3 | 270.1 | 3.9 | 0.85  |
| 11 | 130 | 117 | 1.11 | 0.0529 | 0.0005 | 0.3092 | 0.0063 | 0.0424 | 0.0007 | 273.5 | 4.9 | 267.5 | 4.6 | 0.89  |
| 12 | 64  | 81  | 0.79 | 0.0529 | 0.0008 | 0.3106 | 0.0073 | 0.0426 | 0.0008 | 274.6 | 5.6 | 269   | 4.9 | 0.77  |
| 13 | 25  | 49  | 0.52 | 0.045  | 0.0034 | 0.2553 | 0.0122 | 0.0417 | 0.0022 | 230.8 | 9.9 | 263.4 | 13  | -0.13 |
| 14 | 68  | 79  | 0.85 | 0.0539 | 0.0009 | 0.3093 | 0.0072 | 0.0418 | 0.0008 | 273.6 | 5.6 | 263.8 | 5.2 | 0.71  |
| 15 | 68  | 84  | 0.81 | 0.0516 | 0.0009 | 0.2963 | 0.0077 | 0.0417 | 0.0009 | 263.5 | 6   | 263.1 | 5.8 | 0.75  |
| 16 | 344 | 264 | 1.3  | 0.0529 | 0.0004 | 0.3182 | 0.0068 | 0.0437 | 0.0009 | 280.6 | 5.3 | 275.9 | 5.7 | 0.94  |
| 17 | 14  | 23  | 0.61 | 0.0554 | 0.0031 | 0.3318 | 0.0178 | 0.0449 | 0.0017 | 291   | 14  | 283   | 10  | 0.29  |
| 18 | 61  | 70  | 0.87 | 0.0813 | 0.0009 | 0.4796 | 0.0129 | 0.0427 | 0.001  | 397.8 | 8.8 | 269.7 | 6.1 | 0.91  |
| 19 | 43  | 61  | 0.7  | 0.053  | 0.001  | 0.3136 | 0.0083 | 0.043  | 0.001  | 277   | 6.4 | 271.6 | 6   | 0.72  |
| 20 | 124 | 125 | 0.99 | 0.0529 | 0.0005 | 0.3106 | 0.0041 | 0.0426 | 0.0004 | 274.7 | 3.1 | 269   | 2.4 | 0.70  |

**2010HLJ III-1 (Halajun pluton III)**

|   |    |     |      |        |        |        |        |        |        |        |     |       |     |      |
|---|----|-----|------|--------|--------|--------|--------|--------|--------|--------|-----|-------|-----|------|
| 1 | 39 | 41  | 0.95 | 0.053  | 0.0014 | 0.3117 | 0.0084 | 0.0427 | 0.0005 | 275.5  | 6.5 | 269.4 | 2.9 | 0.26 |
| 2 | 74 | 71  | 1.04 | 0.0519 | 0.0008 | 0.3057 | 0.0055 | 0.0427 | 0.0004 | 270.9  | 4.3 | 269.5 | 2.5 | 0.52 |
| 3 | 23 | 25  | 0.92 | 0.0519 | 0.0016 | 0.3033 | 0.0104 | 0.0423 | 0.0005 | 269    | 8.1 | 267.2 | 3.2 | 0.45 |
| 4 | 89 | 101 | 0.88 | 0.0531 | 0.001  | 0.3114 | 0.0063 | 0.0425 | 0.0005 | 275.2  | 4.9 | 268.5 | 2.9 | 0.41 |
| 5 | 51 | 52  | 0.99 | 0.05   | 0.0026 | 0.2957 | 0.0164 | 0.0428 | 0.0004 | 263    | 13  | 270.2 | 2.6 | 0.44 |
| 6 | 95 | 67  | 1.42 | 0.364  | 0.0032 | 2.2618 | 0.0291 | 0.0451 | 0.0004 | 1200.5 | 9.1 | 284.1 | 2.7 | 0.73 |
| 7 | 43 | 48  | 0.89 | 0.0525 | 0.0026 | 0.3077 | 0.0162 | 0.0425 | 0.0007 | 272.4  | 13  | 268.2 | 4.1 | 0.34 |

|    |     |     |      |        |        |        |        |        |        |        |     |       |     |      |
|----|-----|-----|------|--------|--------|--------|--------|--------|--------|--------|-----|-------|-----|------|
| 8  | 437 | 239 | 1.83 | 0.5192 | 0.0023 | 5.9544 | 0.0614 | 0.0832 | 0.0008 | 1969.2 | 9   | 515.1 | 4.8 | 0.90 |
| 9  | 58  | 49  | 1.17 | 0.1388 | 0.0069 | 1.0804 | 0.1346 | 0.0537 | 0.0031 | 743.8  | 66  | 337.3 | 19  | 1.14 |
| 10 | 76  | 83  | 0.92 | 0.0534 | 0.0006 | 0.317  | 0.0044 | 0.0431 | 0.0004 | 279.6  | 3.4 | 271.9 | 2.6 | 0.59 |
| 11 | 31  | 31  | 1    | 0.0523 | 0.0014 | 0.3087 | 0.0081 | 0.0429 | 0.0005 | 273.2  | 6.2 | 270.9 | 2.9 | 0.18 |
| 12 | 75  | 62  | 1.22 | 0.0876 | 0.001  | 0.5381 | 0.0093 | 0.0445 | 0.0004 | 437.2  | 6.1 | 280.7 | 2.7 | 0.80 |
| 13 | 99  | 79  | 1.24 | 0.053  | 0.0008 | 0.3019 | 0.0051 | 0.0413 | 0.0003 | 267.9  | 4   | 261.1 | 1.9 | 0.45 |
| 14 | 112 | 107 | 1.05 | 0.0527 | 0.0011 | 0.3131 | 0.0071 | 0.0431 | 0.0005 | 276.6  | 5.5 | 271.9 | 2.8 | 0.41 |
| 15 | 222 | 135 | 1.65 | 0.0593 | 0.0007 | 0.38   | 0.005  | 0.0465 | 0.0004 | 327.1  | 3.7 | 293.2 | 2.2 | 0.48 |
| 16 | 89  | 72  | 1.23 | 0.0531 | 0.0007 | 0.3149 | 0.0049 | 0.043  | 0.0004 | 278    | 3.8 | 271.5 | 2.2 | 0.53 |
| 17 | 37  | 42  | 0.87 | 0.0517 | 0.0012 | 0.3013 | 0.0075 | 0.0423 | 0.0005 | 267.4  | 5.9 | 267.1 | 3.1 | 0.37 |
| 18 | 61  | 55  | 1.11 | 0.0541 | 0.0008 | 0.3186 | 0.0064 | 0.0428 | 0.0006 | 280.8  | 4.9 | 270   | 3.5 | 0.68 |
| 19 | 22  | 22  | 0.98 | 0.0519 | 0.0027 | 0.3054 | 0.0171 | 0.0429 | 0.0013 | 270.6  | 13  | 270.6 | 8.1 | 0.40 |
| 20 | 23  | 28  | 0.81 | 0.0514 | 0.0021 | 0.3041 | 0.0166 | 0.0425 | 0.0012 | 269.6  | 13  | 268.6 | 7.5 | 0.68 |

**HLJ026 (Piqiang complex)**

|    |     |     |      |        |        |        |        |        |        |       |      |       |     |      |
|----|-----|-----|------|--------|--------|--------|--------|--------|--------|-------|------|-------|-----|------|
| 1  | 78  | 56  | 1.4  | 0.0533 | 0.0009 | 0.3035 | 0.0061 | 0.0414 | 0.0005 | 269.1 | 4.8  | 261.4 | 3.2 | 0.55 |
| 2  | 78  | 59  | 1.32 | 0.0538 | 0.001  | 0.307  | 0.0071 | 0.0413 | 0.0005 | 271.8 | 5.5  | 260.8 | 2.8 | 0.60 |
| 3  | 29  | 43  | 0.67 | 0.0516 | 0.001  | 0.2943 | 0.0065 | 0.0414 | 0.0005 | 261.9 | 5.1  | 261.4 | 2.9 | 0.48 |
| 4  | 52  | 34  | 1.51 | 0.053  | 0.0015 | 0.2985 | 0.0092 | 0.0409 | 0.0006 | 265.2 | 7.2  | 258.5 | 3.7 | 0.40 |
| 5  | 41  | 36  | 1.13 | 0.0537 | 0.0033 | 0.3087 | 0.0268 | 0.0411 | 0.0018 | 273.2 | 21   | 259.9 | 11  | 0.75 |
| 6  | 122 | 78  | 1.57 | 0.0531 | 0.0011 | 0.3063 | 0.0095 | 0.0419 | 0.001  | 271.3 | 7.4  | 264.5 | 6   | 0.74 |
| 7  | 58  | 62  | 0.93 | 0.0518 | 0.0008 | 0.2944 | 0.0061 | 0.0413 | 0.0007 | 262   | 4.8  | 261   | 4.1 | 0.68 |
| 8  | 32  | 27  | 1.21 | 0.0532 | 0.0027 | 0.3024 | 0.0188 | 0.0412 | 0.0017 | 268.3 | 15   | 260.3 | 11  | 0.58 |
| 9  | 78  | 64  | 1.22 | 0.0545 | 0.0026 | 0.3044 | 0.017  | 0.041  | 0.0019 | 269.8 | 13.2 | 258.9 | 12  | 0.58 |
| 10 | 93  | 76  | 1.22 | 0.0532 | 0.0006 | 0.3021 | 0.0055 | 0.0412 | 0.0006 | 268   | 4.3  | 260.3 | 3.8 | 0.79 |
| 11 | 151 | 145 | 1.04 | 0.0524 | 0.0008 | 0.3114 | 0.009  | 0.0431 | 0.001  | 275.2 | 7    | 271.8 | 6.5 | 0.85 |
| 12 | 41  | 36  | 1.15 | 0.0521 | 0.0011 | 0.2992 | 0.0086 | 0.0419 | 0.0009 | 265.8 | 6.7  | 264.5 | 5.4 | 0.68 |
| 13 | 128 | 103 | 1.25 | 0.0527 | 0.001  | 0.3035 | 0.0108 | 0.0416 | 0.001  | 269.1 | 8.4  | 262.7 | 6.4 | 0.87 |
| 14 | 169 | 128 | 1.32 | 0.0533 | 0.0009 | 0.3076 | 0.0127 | 0.0418 | 0.0016 | 272.3 | 9.8  | 264.1 | 9.9 | 0.91 |
| 15 | 188 | 143 | 1.32 | 0.0537 | 0.001  | 0.3066 | 0.0134 | 0.0413 | 0.0016 | 271.5 | 10   | 261   | 9.9 | 0.90 |
| 16 | 31  | 32  | 0.96 | 0.0522 | 0.0015 | 0.2975 | 0.0102 | 0.0416 | 0.001  | 264.5 | 8    | 262.4 | 5.9 | 0.56 |
| 17 | 302 | 196 | 1.54 | 0.0524 | 0.0004 | 0.3179 | 0.0088 | 0.0437 | 0.0009 | 280.3 | 6.8  | 276   | 5.4 | 0.99 |

|    |     |     |      |        |        |        |        |        |        |       |     |       |     |      |
|----|-----|-----|------|--------|--------|--------|--------|--------|--------|-------|-----|-------|-----|------|
| 18 | 109 | 90  | 1.21 | 0.052  | 0.0008 | 0.2978 | 0.0067 | 0.0415 | 0.0007 | 264.7 | 5.2 | 262.2 | 4.3 | 0.73 |
| 19 | 260 | 182 | 1.43 | 0.0518 | 0.0005 | 0.299  | 0.0048 | 0.0418 | 0.0006 | 265.6 | 3.8 | 264.2 | 3.7 | 0.80 |
| 20 | 58  | 59  | 0.99 | 0.0532 | 0.0015 | 0.3019 | 0.0099 | 0.0412 | 0.0009 | 267.9 | 7.7 | 260.3 | 5.6 | 0.53 |

*HLJ028 (Piqiang complex)*

|    |     |     |      |        |        |        |        |        |        |       |     |       |     |      |
|----|-----|-----|------|--------|--------|--------|--------|--------|--------|-------|-----|-------|-----|------|
| 1  | 22  | 30  | 0.73 | 0.0545 | 0.0017 | 0.3173 | 0.0107 | 0.0422 | 0.0008 | 279.8 | 8.3 | 266.7 | 4.7 | 0.41 |
| 2  | 101 | 101 | 1    | 0.0523 | 0.0006 | 0.2997 | 0.0059 | 0.0416 | 0.0007 | 266.2 | 4.6 | 262.8 | 4.1 | 0.81 |
| 3  | 131 | 124 | 1.06 | 0.0526 | 0.0007 | 0.302  | 0.0062 | 0.0417 | 0.0007 | 268   | 4.8 | 263.7 | 4.5 | 0.76 |
| 4  | 84  | 79  | 1.06 | 0.0518 | 0.0008 | 0.2961 | 0.0072 | 0.0414 | 0.0007 | 263.4 | 5.6 | 261.7 | 4.5 | 0.78 |
| 5  | 133 | 123 | 1.08 | 0.0525 | 0.0005 | 0.2994 | 0.0058 | 0.0415 | 0.0008 | 265.9 | 4.5 | 262   | 4.8 | 0.88 |
| 6  | 53  | 67  | 0.8  | 0.0518 | 0.0009 | 0.2973 | 0.007  | 0.0417 | 0.0007 | 264.3 | 5.5 | 263.1 | 4.4 | 0.68 |
| 7  | 127 | 149 | 0.85 | 0.0528 | 0.0006 | 0.3045 | 0.0062 | 0.0418 | 0.0007 | 269.9 | 4.8 | 263.8 | 4.6 | 0.83 |
| 8  | 64  | 97  | 0.66 | 0.0517 | 0.0007 | 0.2967 | 0.0075 | 0.0415 | 0.0008 | 263.8 | 5.8 | 261.9 | 5.2 | 0.85 |
| 9  | 84  | 105 | 0.8  | 0.0515 | 0.0008 | 0.2954 | 0.0082 | 0.0416 | 0.001  | 262.8 | 6.4 | 262.6 | 6   | 0.83 |
| 10 | 75  | 106 | 0.71 | 0.0518 | 0.0008 | 0.2953 | 0.0066 | 0.0414 | 0.0008 | 262.7 | 5.2 | 261.7 | 4.7 | 0.73 |
| 11 | 131 | 142 | 0.93 | 0.0515 | 0.0006 | 0.2971 | 0.0061 | 0.0418 | 0.0006 | 264.1 | 4.7 | 263.7 | 3.8 | 0.83 |
| 12 | 149 | 344 | 0.43 | 0.0528 | 0.0003 | 0.3023 | 0.0051 | 0.0415 | 0.0007 | 268.2 | 4   | 262.3 | 4.2 | 0.94 |
| 13 | 82  | 101 | 0.82 | 0.0514 | 0.0006 | 0.2935 | 0.0057 | 0.0414 | 0.0006 | 261.3 | 4.5 | 261.2 | 3.6 | 0.80 |
| 14 | 38  | 61  | 0.62 | 0.0517 | 0.001  | 0.2936 | 0.0064 | 0.0413 | 0.0006 | 261.4 | 5   | 260.7 | 3.5 | 0.49 |
| 15 | 285 | 227 | 1.25 | 0.0516 | 0.0004 | 0.2925 | 0.0042 | 0.0412 | 0.0006 | 260.5 | 3.3 | 260.3 | 3.5 | 0.86 |
| 16 | 132 | 184 | 0.72 | 0.0517 | 0.0004 | 0.2946 | 0.0052 | 0.0413 | 0.0006 | 262.2 | 4   | 261   | 3.6 | 0.90 |
| 17 | 146 | 144 | 1.02 | 0.0514 | 0.0005 | 0.2897 | 0.0046 | 0.0409 | 0.0005 | 258.3 | 3.6 | 258.3 | 3.1 | 0.79 |
| 18 | 146 | 186 | 0.78 | 0.0522 | 0.0005 | 0.2962 | 0.0051 | 0.0412 | 0.0006 | 263.5 | 4   | 260   | 3.7 | 0.83 |
| 19 | 145 | 152 | 0.95 | 0.0516 | 0.0005 | 0.2945 | 0.005  | 0.0414 | 0.0006 | 262.1 | 3.9 | 261.8 | 3.5 | 0.82 |
| 20 | 249 | 235 | 1.06 | 0.0512 | 0.0004 | 0.2924 | 0.0049 | 0.0414 | 0.0006 | 260.4 | 3.8 | 261.8 | 3.8 | 0.88 |

Zhang & Zou (2013)

| Sample spot no.      | U (ppm) | Th/U | $f_{206}^{\&}$ (%) | $^{238}\text{U}/^{206}\text{Pb}$ | $\pm 1\sigma$ (%) | $^{207}\text{Pb}/^{206}\text{Pb}$ | $\pm 1\sigma$ (%) | $^{207}\text{Pb}/^{235}\text{U}^*$ | $\pm 1\sigma$ (%) | $^{206}\text{Pb}/^{238}\text{U}^*$ | $\pm 1\sigma$ (%) | $t_{206/238}$ (Ma) | $\pm 1\sigma$ | RHO   |
|----------------------|---------|------|--------------------|----------------------------------|-------------------|-----------------------------------|-------------------|------------------------------------|-------------------|------------------------------------|-------------------|--------------------|---------------|-------|
| Perovskites (DW31-4) |         |      |                    |                                  |                   |                                   |                   |                                    |                   |                                    |                   |                    |               |       |
| DW31-4@1             | 109     | 22   | 58.15              | 9.086                            | 3.16              | 0.5093                            | 1.52              | 0.3669                             | 54                | 0.0476                             | 3.8               | 296.1              | 12            | 8.57  |
| DW31-4@2             | 116     | 26.6 | 32.57              | 14.588                           | 3.17              | 0.2955                            | 3.59              | 0.2243                             | 69                | 0.0468                             | 3.5               | 300.1              | 11            | 10.88 |
| DW31-4@3             | 121     | 33.3 | 32.73              | 13.736                           | 3.17              | 0.3139                            | 2.86              | 0.4096                             | 37                | 0.0496                             | 3.4               | 308                | 11            | 5.84  |
| DW31-4@4             | 107     | 10.2 | 43.29              | 12.136                           | 3.28              | 0.4021                            | 1.62              | 0.4644                             | 29                | 0.0476                             | 3.6               | 291.5              | 11            | 4.46  |
| DW31-4@5             | 89      | 18.8 | 53.28              | 10.061                           | 4.18              | 0.4682                            | 2.34              | 0.3243                             | 63                | 0.0477                             | 4.8               | 299.6              | 16            | 7.56  |
| DW31-4@6             | 67      | 8    | 57.14              | 9.038                            | 3.27              | 0.4893                            | 1.02              | 0.1927                             | 94                | 0.049                              | 4.1               | 314.8              | 12            | 14.39 |
| DW31-4@7             | 113     | 10.4 | 70.02              | 6.631                            | 3.15              | 0.6062                            | 0.87              | 0.4568                             | 55                | 0.0478                             | 4                 | 290.4              | 14            | 8.76  |
| DW31-4@8             | 41      | 10.1 | 9.52               | 19.257                           | 3.15              | 0.1301                            | 1.98              | 0.3629                             | 10                | 0.0471                             | 3.2               | 295.2              | 9.2           | 1.68  |
| DW31-4@9             | 118     | 35.5 | 37.58              | 13.754                           | 3.15              | 0.347                             | 1.59              | 0.3355                             | 47                | 0.0461                             | 3.8               | 288.9              | 10            | 7.49  |
| DW31-4@10            | 125     | 26.7 | 32.4               | 14.353                           | 3.18              | 0.3202                            | 0.9               | 0.4798                             | 19                | 0.0477                             | 3.2               | 291.5              | 9.5           | 3.06  |
| DW31-4@11            | 120     | 20.3 | 38.05              | 14.042                           | 3.16              | 0.345                             | 1.22              | 0.2708                             | 40                | 0.0448                             | 3.4               | 284.2              | 9.4           | 6.36  |
| DW31-4@12            | 96      | 27.9 | 43.77              | 11.839                           | 3.17              | 0.3888                            | 1.01              | 0.276                              | 43                | 0.0484                             | 3.3               | 307.4              | 10            | 6.82  |
| DW31-4@13            | 110     | 20.4 | 28.73              | 15.331                           | 3.15              | 0.2682                            | 1                 | 0.2564                             | 38                | 0.047                              | 3.3               | 299.6              | 9.5           | 6.07  |
| DW31-4@14            | 204     | 30.9 | 27.52              | 15.708                           | 3.15              | 0.2642                            | 1.62              | 0.3037                             | 41                | 0.0466                             | 3.4               | 294.5              | 9.5           | 6.54  |
| DW31-4@15            | 132     | 30.9 | 38.38              | 13.693                           | 3.18              | 0.3426                            | 2.99              | 0.2253                             | 65                | 0.0457                             | 3.5               | 292.6              | 11            | 10.22 |
| DW31-4@16            | 117     | 34.2 | 26.54              | 15.294                           | 3.16              | 0.2528                            | 1.33              | 0.2823                             | 29                | 0.0485                             | 3.3               | 308.2              | 10            | 4.63  |
| DW31-4@17            | 148     | 19.9 | 43.11              | 12.011                           | 3.21              | 0.3879                            | 1.68              | 0.324                              | 54                | 0.0483                             | 3.9               | 303.7              | 11            | 8.43  |
| DW31-4@18            | 127     | 23   | 24.95              | 15.871                           | 3.15              | 0.2522                            | 1.34              | 0.3828                             | 22                | 0.0477                             | 3.2               | 297.4              | 9.5           | 3.55  |
| DW31-4@19            | 110     | 28.6 | 30.27              | 14.251                           | 3.15              | 0.2935                            | 1                 | 0.396                              | 24                | 0.0495                             | 3.3               | 308.2              | 10            | 3.87  |
| DW31-4@20            | 113     | 28.9 | 36.38              | 13.777                           | 3.15              | 0.3228                            | 0.92              | 0.1924                             | 55                | 0.0468                             | 3.4               | 302.1              | 10            | 8.76  |
| DW31-4@21            | 107     | 29.7 | 34.84              | 13.118                           | 3.15              | 0.334                             | 2.21              | 0.4552                             | 31                | 0.0503                             | 3.4               | 310.4              | 11            | 4.95  |

|           |     |      |       |        |      |        |      |        |    |        |     |       |    |      |
|-----------|-----|------|-------|--------|------|--------|------|--------|----|--------|-----|-------|----|------|
| DW31-4@22 | 100 | 25.2 | 23.75 | 16.508 | 3.15 | 0.2339 | 2.22 | 0.2985 | 26 | 0.0465 | 3.2 | 294.7 | 10 | 4.16 |
| DW31-4@23 | 95  | 22.8 | 43.39 | 11.386 | 3.15 | 0.4015 | 0.94 | 0.4782 | 31 | 0.0507 | 3.2 | 310.8 | 10 | 4.97 |

| Sample spot no.       | U (ppm) | Th (ppm) | Th/U | $f_{206}^{\text{R}}$ (%) | $^{207}\text{Pb}/^{235}\text{U}^*$ | $\pm 1\sigma$ (%) | $^{206}\text{Pb}/^{238}\text{U}^*$ | $\pm 1\sigma$ (%) | r            | $t_{207/235}$ (Ma) | $\pm 1\sigma$ | $t_{206/238}$ (Ma) | $\pm 1\sigma$ |
|-----------------------|---------|----------|------|--------------------------|------------------------------------|-------------------|------------------------------------|-------------------|--------------|--------------------|---------------|--------------------|---------------|
| Baddeleyites (DW21-1) |         |          |      |                          |                                    |                   |                                    |                   |              |                    |               |                    |               |
| DW21-1@01             | 449     | 40       | 0.09 | 3.32                     | 0.3366                             | 4.8               | 0.0454                             | 2.8               | <b>0.527</b> | 294.6              | 12.3          | 286.2              | 7.9           |
| DW21-1@02             | 106     | 14       | 0.13 | 0.04                     | 0.3161                             | 3.5               | 0.0441                             | 2.8               | <b>0.751</b> | 278.9              | 8.6           | 278.2              | 7.6           |
| DW21-1@03             | 213     | 34       | 0.16 | 0.49                     | 0.3352                             | 3.7               | 0.0479                             | 2.8               | <b>0.697</b> | 293.5              | 9.6           | 301.4              | 8.3           |
| DW21-1@04             | 152     | 14       | 0.09 | 0.09                     | 0.3518                             | 3.4               | 0.0497                             | 2.8               | <b>0.791</b> | 306.1              | 9             | 312.5              | 8.6           |
| DW21-1@05             | 148     | 14       | 0.09 | 0.05                     | 0.367                              | 3.3               | 0.0518                             | 2.8               | <b>0.812</b> | 317.4              | 9.2           | 325.7              | 9.1           |
| DW21-1@06             | 407     | 7        | 0.02 | 0.05                     | 0.3367                             | 3.1               | 0.0458                             | 2.8               | <b>0.876</b> | 294.6              | 8.1           | 288.6              | 8.1           |
| DW21-1@07             | 192     | 10       | 0.05 | 0.02                     | 0.3486                             | 3.2               | 0.0493                             | 2.8               | <b>0.849</b> | 303.7              | 8.4           | 310.2              | 8.5           |
| DW21-1@08             | 285     | 38       | 0.13 | 0.05                     | 0.3474                             | 3.1               | 0.0481                             | 2.8               | <b>0.862</b> | 302.7              | 8.3           | 303                | 8.4           |
| DW21-1@09             | 71      | 1        | 0.02 | 0                        | 0.337                              | 3.8               | 0.0456                             | 2.8               | <b>0.688</b> | 294.9              | 9.9           | 287.2              | 8             |
| DW21-1@10             | 303     | 15       | 0.05 | 0.02                     | 0.3731                             | 3.1               | 0.0515                             | 2.9               | <b>0.904</b> | 321.9              | 8.6           | 323.8              | 9.1           |
| DW21-1@11             | 141     | 3        | 0.02 | 0                        | 0.3546                             | 3.8               | 0.0492                             | 2.8               | <b>0.676</b> | 308.2              | 10.2          | 309.8              | 8.5           |
| DW21-1@12             | 285     | 17       | 0.06 | 0.04                     | 0.356                              | 3.4               | 0.0494                             | 2.8               | <b>0.782</b> | 309.2              | 9.1           | 310.6              | 8.5           |
| DW21-1@13             | 316     | 6        | 0.02 | 0.03                     | 0.3288                             | 3.1               | 0.046                              | 2.8               | <b>0.883</b> | 288.6              | 7.8           | 289.9              | 8             |
| DW21-1@14             | 234     | 15       | 0.06 | 0.1                      | 0.369                              | 3.2               | 0.0523                             | 2.8               | <b>0.848</b> | 318.9              | 8.7           | 328.6              | 9             |
| DW21-1@15             | 175     | 3        | 0.02 | 0.02                     | 0.3451                             | 3.2               | 0.0476                             | 2.8               | <b>0.849</b> | 301                | 8.3           | 299.5              | 8.2           |
| DW21-1@16             | 417     | 18       | 0.04 | 0.25                     | 0.3435                             | 3.1               | 0.0475                             | 2.8               | <b>0.86</b>  | 299.8              | 8.2           | 299.1              | 8.2           |
| DW21-1@17             | 188     | 22       | 0.12 | 0.08                     | 0.3383                             | 3.3               | 0.0478                             | 2.8               | <b>0.817</b> | 295.9              | 8.4           | 301.2              | 8.3           |
| DW21-1@18             | 289     | 25       | 0.09 | 1.27                     | 0.3706                             | 3.7               | 0.0492                             | 2.8               | <b>0.708</b> | 320.1              | 10.2          | 309.6              | 8.5           |

|                       |     |     |      |       |        |     |        |     |              |       |      |       |     |
|-----------------------|-----|-----|------|-------|--------|-----|--------|-----|--------------|-------|------|-------|-----|
| DW21-1@19             | 165 | 4   | 0.03 | 0.07  | 0.3169 | 4.9 | 0.0481 | 2.8 | <b>0.511</b> | 279.5 | 12.1 | 302.8 | 8.3 |
| DW21-1@20             | 59  | 12  | 0.2  | 0.07  | 0.3265 | 3.9 | 0.0461 | 2.8 | <b>0.652</b> | 286.9 | 9.9  | 290.7 | 8   |
| DW21-1@21             | 172 | 13  | 0.08 | 49.21 | 0.3323 | 3.5 | 0.0476 | 2.8 | <b>0.737</b> | 291.3 | 9.1  | 300   | 8.2 |
| Baddeleyites (DW21-4) |     |     |      |       |        |     |        |     |              |       |      |       |     |
| DW21-4@01             | 589 | 221 | 0.37 | 0.43  | 0.3471 | 3   | 0.0478 | 2.8 | <b>0.911</b> | 302.5 | 7.9  | 301.1 | 8.3 |
| DW21-4@02             | 179 | 3   | 0.01 | 0.48  | 0.3305 | 5.7 | 0.0468 | 2.8 | <b>0.436</b> | 290   | 14.5 | 294.8 | 8.1 |
| DW21-4@03             | 143 | 2   | 0.01 | 0     | 0.3378 | 3.2 | 0.047  | 2.8 | <b>0.821</b> | 295.5 | 8.4  | 296.2 | 8.1 |
| DW21-4@04             | 433 | 31  | 0.07 | 0.01  | 0.3549 | 5.4 | 0.0505 | 2.8 | <b>0.473</b> | 308.4 | 14.5 | 317.3 | 8.9 |
| DW21-4@05             | 790 | 9   | 0.01 | 0.01  | 0.3262 | 2.9 | 0.0458 | 2.8 | <b>0.924</b> | 286.7 | 7.4  | 288.4 | 7.9 |
| DW21-4@06             | 169 | 7   | 0.04 | 0.03  | 0.3596 | 3.3 | 0.0503 | 2.8 | <b>0.789</b> | 311.9 | 9.1  | 316.3 | 8.7 |
| DW21-4@07             | 141 | 3   | 0.02 | 0.03  | 0.3607 | 4.2 | 0.0488 | 2.8 | <b>0.604</b> | 312.7 | 11.5 | 307.4 | 8.4 |
| DW21-4@08             | 309 | 23  | 0.07 | 0.03  | 0.3582 | 3   | 0.0498 | 2.8 | <b>0.888</b> | 310.8 | 8.3  | 313   | 8.6 |
| DW21-4@09             | 252 | 6   | 0.02 | 0.02  | 0.3542 | 3.2 | 0.0493 | 2.8 | <b>0.834</b> | 307.9 | 8.6  | 309.9 | 8.5 |
| DW21-4@10             | 480 | 54  | 0.11 | 4.26  | 0.3623 | 3.2 | 0.0511 | 2.8 | <b>0.845</b> | 313.9 | 8.7  | 321.2 | 8.8 |
| DW21-4@11             | 429 | 21  | 0.05 | 0     | 0.3319 | 5.7 | 0.0468 | 2.8 | <b>0.432</b> | 291   | 14.6 | 294.9 | 8.1 |
| DW21-4@12             | 318 | 5   | 0.02 | 0     | 0.3367 | 3.1 | 0.0459 | 2.8 | <b>0.858</b> | 294.7 | 8.1  | 289.5 | 7.9 |
| DW21-4@13             | 134 | 3   | 0.02 | 0.06  | 0.3662 | 4.3 | 0.0503 | 2.8 | <b>0.594</b> | 316.9 | 11.8 | 316.4 | 8.7 |
| DW21-4@14             | 270 | 3   | 0.01 | 0.08  | 0.3202 | 6.9 | 0.0463 | 2.8 | <b>0.354</b> | 282.1 | 17.3 | 291.9 | 8   |
| DW21-4@15             | 265 | 6   | 0.02 | 0.08  | 0.3518 | 3.1 | 0.0485 | 2.8 | <b>0.879</b> | 306.1 | 8.2  | 305.4 | 8.4 |
| DW21-4@16             | 140 | 3   | 0.02 | 0     | 0.3414 | 3.3 | 0.0476 | 2.8 | <b>0.794</b> | 298.3 | 8.7  | 299.7 | 8.2 |
| DW21-4@17             | 175 | 3   | 0.02 | 0.06  | 0.3181 | 3.8 | 0.0432 | 2.8 | <b>0.682</b> | 280.4 | 9.4  | 272.6 | 7.5 |
| DW21-4@18             | 148 | 4   | 0.03 | 0.14  | 0.3288 | 3.6 | 0.0463 | 2.8 | <b>0.724</b> | 288.6 | 9.1  | 291.7 | 8   |
| DW21-4@19             | 92  | 2   | 0.02 | 0.14  | 0.3316 | 3.7 | 0.0456 | 2.9 | <b>0.746</b> | 290.8 | 9.4  | 287.6 | 8.2 |
| DW21-4@20             | 335 | 9   | 0.03 | 0.01  | 0.3491 | 3   | 0.0502 | 2.8 | <b>0.897</b> | 304   | 8.1  | 315.9 | 8.7 |

|               |     |    |      |      |        |     |      |     |              |       |   |       |     |
|---------------|-----|----|------|------|--------|-----|------|-----|--------------|-------|---|-------|-----|
| DW21-<br>4@21 | 556 | 12 | 0.02 | 0.03 | 0.3614 | 2.9 | 0.05 | 2.8 | <b>0.937</b> | 313.3 | 8 | 314.6 | 8.6 |
|---------------|-----|----|------|------|--------|-----|------|-----|--------------|-------|---|-------|-----|

---

[Zhang et al. \(2013\)](#)

| Th/U | $f_{206}(\%)$ | Isotope ratio                     |            |                                  |            |                                  |            | Age (Ma)                          |            |                                  |            |                                  |            | RHO  |
|------|---------------|-----------------------------------|------------|----------------------------------|------------|----------------------------------|------------|-----------------------------------|------------|----------------------------------|------------|----------------------------------|------------|------|
|      |               | $^{207}\text{Pb}/^{206}\text{Pb}$ | 1 $\sigma$ | $^{207}\text{Pb}/^{235}\text{U}$ | 1 $\sigma$ | $^{206}\text{Pb}/^{238}\text{U}$ | 1 $\sigma$ | $^{207}\text{Pb}/^{206}\text{Pb}$ | 1 $\sigma$ | $^{207}\text{Pb}/^{235}\text{U}$ | 1 $\sigma$ | $^{206}\text{Pb}/^{238}\text{U}$ | 1 $\sigma$ |      |
| 0.49 | 0.01          | 0.1105                            | 0.45       | 4.723                            | 1.57       | 0.31                             | 1.5        | 1808                              | 8          | 1771                             | 13         | 1741                             | 23         | 0.96 |
| 0.64 | 0.1           | 0.0666                            | 0.9        | 1.221                            | 1.75       | 0.1329                           | 1.5        | 826                               | 19         | 810                              | 10         | 805                              | 11         | 0.86 |
| 1.56 | 0.04          | 0.066                             | 0.9        | 1.171                            | 1.75       | 0.1286                           | 1.5        | 807                               | 19         | 787                              | 10         | 780                              | 11         | 0.86 |
| 0.55 | 0.03          | 0.0702                            | 0.94       | 1.483                            | 1.77       | 0.1533                           | 1.5        | 933                               | 19         | 923                              | 11         | 919                              | 13         | 0.85 |
| 0.22 | 0.01          | 0.1178                            | 0.31       | 5.357                            | 1.56       | 0.3298                           | 1.52       | 1923                              | 6          | 1878                             | 13         | 1838                             | 24         | 0.98 |
| 1.14 | 0.04          | 0.0662                            | 1.26       | 1.075                            | 1.96       | 0.1177                           | 1.5        | 814                               | 26         | 741                              | 10         | 717                              | 10         | 0.77 |
| 0.56 | 0.1           | 0.1109                            | 0.6        | 4.646                            | 1.62       | 0.3038                           | 1.5        | 1815                              | 11         | 1758                             | 14         | 1710                             | 23         | 0.93 |
| 0.86 | 0.01          | 0.0651                            | 2.02       | 1.082                            | 1.55       | 0.1206                           | 1.56       | 777                               | 42         | 745                              | 14         | 734                              | 11         | 0.16 |
| 0.61 | 0.04          | 0.1116                            | 0.46       | 4.695                            | 1.57       | 0.3051                           | 1.5        | 1826                              | 8          | 1766                             | 13         | 1717                             | 23         | 0.96 |
| 0.48 | 0.02          | 0.0692                            | 0.99       | 1.387                            | 1.8        | 0.1454                           | 1.5        | 904                               | 20         | 884                              | 11         | 875                              | 12         | 0.84 |
| 0.74 | 0.03          | 0.0659                            | 0.88       | 1.211                            | 1.74       | 0.1332                           | 1.5        | 803                               | 18         | 805                              | 10         | 806                              | 11         | 0.86 |
| 0.47 | 0.03          | 0.0662                            | 0.68       | 1.169                            | 1.65       | 0.1281                           | 1.5        | 812                               | 14         | 786                              | 9          | 777                              | 11         | 0.91 |
| 0.13 | 0.05          | 0.0814                            | 0.57       | 2.319                            | 1.61       | 0.2067                           | 1.5        | 1231                              | 11         | 1218                             | 11         | 1211                             | 17         | 0.94 |
| 0.25 | 0.01          | 0.0659                            | 0.44       | 1.187                            | 1.56       | 0.1307                           | 1.5        | 802                               | 9          | 795                              | 9          | 792                              | 11         | 0.96 |
| 0.35 | 0.02          | 0.1126                            | 0.65       | 4.933                            | 1.64       | 0.3179                           | 1.5        | 1841                              | 12         | 1808                             | 14         | 1779                             | 23         | 0.92 |
| 0.4  | 0.22          | 0.1059                            | 0.57       | 4.406                            | 1.61       | 0.3018                           | 1.5        | 1730                              | 10         | 1713                             | 13         | 1700                             | 22         | 0.94 |
| 0.8  | 0.06          | 0.1624                            | 0.49       | 10.045                           | 1.58       | 0.4487                           | 1.5        | 2480                              | 8          | 2439                             | 15         | 2390                             | 30         | 0.95 |

Wei & Xu (2013)



| Spots          | Element |     | Th/U | Isotopic ratios                      |        |                                     |        |                                     |        | Apparent age (Ma)                    |     |                                     |    |                                     |    | RHO   |
|----------------|---------|-----|------|--------------------------------------|--------|-------------------------------------|--------|-------------------------------------|--------|--------------------------------------|-----|-------------------------------------|----|-------------------------------------|----|-------|
|                | (ppm)   |     |      | <sup>207</sup> Pb/ <sup>206</sup> Pb | 1σ     | <sup>207</sup> Pb/ <sup>235</sup> U | 1σ     | <sup>206</sup> Pb/ <sup>238</sup> U | 1σ     | <sup>207</sup> Pb/ <sup>206</sup> Pb | 1σ  | <sup>207</sup> Pb/ <sup>235</sup> U | 1σ | <sup>206</sup> Pb/ <sup>238</sup> U | 1σ |       |
|                | U       | Th  |      |                                      |        |                                     |        |                                     |        |                                      |     |                                     |    |                                     |    |       |
| <b>QMG1106</b> |         |     |      |                                      |        |                                     |        |                                     |        |                                      |     |                                     |    |                                     |    |       |
| QMG1106-01     | 367     | 281 | 0.8  | 0.0575                               | 0.002  | 0.5977                              | 0.0202 | 0.0731                              | 0.0011 | 510                                  | 47  | 476                                 | 13 | 455                                 | 7  | 0.12  |
| QMG1106-02     | 186     | 122 | 0.7  | 0.0542                               | 0.0051 | 0.506                               | 0.0464 | 0.0678                              | 0.0014 | 377                                  | 216 | 416                                 | 31 | 423                                 | 9  | -0.01 |
| QMG1106-03     | 189     | 125 | 0.7  | 0.0572                               | 0.0031 | 0.5855                              | 0.03   | 0.072                               | 0.0014 | 500                                  | 77  | 468                                 | 19 | 448                                 | 9  | 0.06  |
| QMG1106-04     | 685     | 431 | 0.6  | 0.156                                | 0.003  | 7.8548                              | 0.1161 | 0.3651                              | 0.0043 | 2413                                 | 33  | 2215                                | 13 | 2006                                | 21 | -0.01 |
| QMG1106-05     | 279     | 302 | 1.1  | 0.0569                               | 0.0022 | 0.5953                              | 0.0222 | 0.0736                              | 0.0012 | 488                                  | 54  | 474                                 | 14 | 458                                 | 7  | 0.11  |
| QMG1106-06     | 478     | 518 | 1.1  | 0.0588                               | 0.0019 | 0.5417                              | 0.0167 | 0.0649                              | 0.001  | 558                                  | 42  | 440                                 | 11 | 405                                 | 6  | 0.15  |
| QMG1106-07     | 821     | 386 | 0.5  | 0.0584                               | 0.0016 | 0.5369                              | 0.014  | 0.0647                              | 0.0009 | 544                                  | 34  | 436                                 | 9  | 404                                 | 5  | 0.18  |
| QMG1106-08     | 577     | 455 | 0.8  | 0.1426                               | 0.0039 | 7.1811                              | 0.1693 | 0.3653                              | 0.005  | 2259                                 | 48  | 2134                                | 21 | 2007                                | 23 | 0.00  |
| QMG1106-09     | 261     | 155 | 0.6  | 0.0545                               | 0.0024 | 0.5763                              | 0.0247 | 0.0744                              | 0.0013 | 391                                  | 65  | 462                                 | 16 | 463                                 | 8  | 0.09  |
| QMG1106-10     | 287     | 165 | 0.6  | 0.0597                               | 0.0034 | 0.3871                              | 0.0207 | 0.0456                              | 0.001  | 592                                  | 80  | 332                                 | 15 | 288                                 | 6  | 0.08  |
| QMG1106-11     | 197     | 70  | 0.4  | 0.0653                               | 0.0024 | 1.2691                              | 0.0449 | 0.1367                              | 0.0023 | 783                                  | 47  | 832                                 | 20 | 826                                 | 13 | 0.13  |
| QMG1106-12     | 43      | 70  | 1.6  | 0.1257                               | 0.0042 | 6.1141                              | 0.1907 | 0.3421                              | 0.0067 | 2039                                 | 29  | 1992                                | 27 | 1897                                | 32 | 0.20  |
| QMG1106-13     | 192     | 135 | 0.7  | 0.0568                               | 0.0033 | 0.5222                              | 0.0293 | 0.0647                              | 0.0014 | 482                                  | 86  | 427                                 | 20 | 404                                 | 8  | 0.07  |
| QMG1106-14     | 739     | 274 | 0.4  | 0.0544                               | 0.0018 | 0.4654                              | 0.015  | 0.0602                              | 0.0009 | 388                                  | 46  | 388                                 | 10 | 377                                 | 5  | 0.14  |
| QMG1106-15     | 447     | 193 | 0.4  | 0.07                                 | 0.0028 | 1.2699                              | 0.0473 | 0.1276                              | 0.0022 | 928                                  | 48  | 832                                 | 21 | 774                                 | 13 | 0.11  |
| QMG1106-16     | 303     | 152 | 0.5  | 0.0714                               | 0.0029 | 1.7254                              | 0.0676 | 0.17                                | 0.0031 | 968                                  | 50  | 1018                                | 25 | 1012                                | 17 | 0.12  |
| QMG1106-17     | 218     | 160 | 0.7  | 0.0523                               | 0.0029 | 0.4563                              | 0.0239 | 0.0613                              | 0.0012 | 300                                  | 84  | 382                                 | 17 | 384                                 | 7  | 0.08  |
| QMG1106-18     | 89      | 66  | 0.7  | 0.1353                               | 0.0036 | 6.4008                              | 0.1599 | 0.3326                              | 0.0057 | 2168                                 | 22  | 2032                                | 22 | 1851                                | 28 | 0.23  |
| QMG1106-19     | 727     | 88  | 0.1  | 0.0998                               | 0.0016 | 2.6664                              | 0.04   | 0.1879                              | 0.0023 | 1620                                 | 13  | 1319                                | 11 | 1110                                | 12 | 0.33  |
| QMG1106-20     | 133     | 99  | 0.7  | 0.1306                               | 0.0033 | 7.3035                              | 0.171  | 0.3932                              | 0.0064 | 2106                                 | 20  | 2149                                | 21 | 2138                                | 30 | 0.25  |
| QMG1106-21     | 198     | 104 | 0.5  | 0.0521                               | 0.0038 | 0.3338                              | 0.0233 | 0.0451                              | 0.0011 | 290                                  | 116 | 292                                 | 18 | 284                                 | 7  | 0.04  |

|            |     |     |     |        |        |        |        |        |        |      |     |      |    |      |    |      |
|------------|-----|-----|-----|--------|--------|--------|--------|--------|--------|------|-----|------|----|------|----|------|
| QMG1106-22 | 345 | 144 | 0.4 | 0.1285 | 0.0021 | 7.1321 | 0.1096 | 0.3902 | 0.0051 | 2078 | 12  | 2128 | 14 | 2124 | 23 | 0.35 |
| QMG1106-23 | 911 | 468 | 0.5 | 0.0579 | 0.0017 | 0.5152 | 0.0146 | 0.0625 | 0.0009 | 527  | 38  | 422  | 10 | 391  | 5  | 0.16 |
| QMG1106-24 | 68  | 44  | 0.6 | 0.0636 | 0.0043 | 1.1574 | 0.074  | 0.1279 | 0.0032 | 729  | 93  | 781  | 35 | 776  | 18 | 0.07 |
| QMG1106-25 | 118 | 285 | 2.4 | 0.0666 | 0.0035 | 1.1569 | 0.0572 | 0.1221 | 0.0025 | 827  | 68  | 781  | 27 | 742  | 15 | 0.08 |
| QMG1106-26 | 388 | 281 | 0.7 | 0.0579 | 0.0039 | 0.5857 | 0.0384 | 0.0734 | 0.0013 | 526  | 153 | 468  | 25 | 456  | 8  | 0.01 |
| QMG1106-27 | 305 | 65  | 0.2 | 0.0641 | 0.0031 | 1.1602 | 0.0536 | 0.1273 | 0.0025 | 745  | 64  | 782  | 25 | 772  | 14 | 0.09 |
| QMG1106-28 | 264 | 168 | 0.6 | 0.0558 | 0.0024 | 0.5487 | 0.0223 | 0.0692 | 0.0012 | 444  | 61  | 444  | 15 | 431  | 7  | 0.10 |
| QMG1106-29 | 131 | 63  | 0.5 | 0.0509 | 0.0052 | 0.3263 | 0.0322 | 0.0451 | 0.0014 | 235  | 166 | 287  | 25 | 284  | 8  | 0.04 |
| QMG1106-30 | 345 | 27  | 0.1 | 0.1162 | 0.0025 | 5.1799 | 0.091  | 0.3233 | 0.0042 | 1899 | 40  | 1849 | 15 | 1806 | 20 | 0.01 |
| QMG1106-31 | 315 | 163 | 0.5 | 0.0539 | 0.0031 | 0.3458 | 0.0192 | 0.0451 | 0.0009 | 368  | 89  | 302  | 14 | 284  | 6  | 0.05 |
| QMG1106-32 | 471 | 308 | 0.7 | 0.0571 | 0.0019 | 0.5553 | 0.0174 | 0.0684 | 0.001  | 497  | 43  | 448  | 11 | 426  | 6  | 0.14 |
| QMG1106-33 | 39  | 35  | 0.9 | 0.0496 | 0.0089 | 0.3192 | 0.0554 | 0.0453 | 0.002  | 175  | 278 | 281  | 43 | 285  | 13 | 0.01 |
| QMG1106-34 | 473 | 368 | 0.8 | 0.0575 | 0.0025 | 0.5607 | 0.0229 | 0.0686 | 0.0012 | 511  | 60  | 452  | 15 | 427  | 7  | 0.10 |
| QMG1106-35 | 98  | 114 | 1.2 | 0.061  | 0.0068 | 0.3667 | 0.0392 | 0.0423 | 0.0015 | 638  | 169 | 317  | 29 | 267  | 9  | 0.02 |
| QMG1106-36 | 942 | 916 | 1   | 0.064  | 0.0021 | 0.4927 | 0.0156 | 0.0541 | 0.0008 | 742  | 42  | 407  | 11 | 340  | 5  | 0.11 |
| QMG1106-37 | 293 | 169 | 0.6 | 0.0547 | 0.0038 | 0.5099 | 0.0343 | 0.0676 | 0.0012 | 400  | 160 | 418  | 23 | 422  | 7  | 0.01 |
| QMG1106-38 | 440 | 222 | 0.5 | 0.0576 | 0.0031 | 0.5477 | 0.0284 | 0.0689 | 0.0011 | 515  | 122 | 443  | 19 | 430  | 6  | 0.02 |
| QMG1106-39 | 128 | 71  | 0.6 | 0.057  | 0.0037 | 0.538  | 0.033  | 0.0664 | 0.0015 | 490  | 96  | 437  | 22 | 414  | 9  | 0.06 |
| QMG1106-40 | 71  | 62  | 0.9 | 0.1211 | 0.0049 | 6.2321 | 0.237  | 0.3618 | 0.0082 | 1973 | 37  | 2009 | 33 | 1991 | 39 | 0.18 |
| QMG1106-41 | 561 | 459 | 0.8 | 0.0671 | 0.0039 | 0.5787 | 0.0321 | 0.0625 | 0.001  | 842  | 124 | 464  | 21 | 391  | 6  | 0.00 |
| QMG1106-42 | 184 | 74  | 0.4 | 0.1179 | 0.0039 | 5.8839 | 0.1814 | 0.351  | 0.0067 | 1924 | 29  | 1959 | 27 | 1939 | 32 | 0.20 |
| QMG1106-43 | 170 | 121 | 0.7 | 0.0487 | 0.0056 | 0.3918 | 0.0437 | 0.0583 | 0.0015 | 136  | 247 | 336  | 32 | 365  | 9  | 0.01 |
| QMG1106-44 | 466 | 400 | 0.9 | 0.0786 | 0.003  | 1.8731 | 0.0658 | 0.1729 | 0.0023 | 1161 | 76  | 1072 | 23 | 1028 | 12 | 0.00 |
| QMG1106-45 | 586 | 538 | 0.9 | 0.0531 | 0.0049 | 0.3306 | 0.0299 | 0.0451 | 0.0009 | 335  | 212 | 290  | 23 | 285  | 6  | 0.00 |
| QMG1106-46 | 95  | 38  | 0.4 | 0.0711 | 0.0039 | 1.3356 | 0.0689 | 0.132  | 0.0029 | 961  | 70  | 861  | 30 | 799  | 17 | 0.08 |

|            |     |     |     |        |        |        |        |        |        |      |     |      |    |      |    |       |
|------------|-----|-----|-----|--------|--------|--------|--------|--------|--------|------|-----|------|----|------|----|-------|
| QMG1106-47 | 45  | 39  | 0.9 | 0.0569 | 0.0064 | 0.5307 | 0.0576 | 0.0656 | 0.0023 | 488  | 180 | 432  | 38 | 409  | 14 | 0.03  |
| QMG1106-48 | 96  | 54  | 0.6 | 0.0555 | 0.0043 | 0.5447 | 0.0407 | 0.0691 | 0.0018 | 430  | 121 | 442  | 27 | 431  | 11 | 0.05  |
| QMG1106-49 | 273 | 216 | 0.8 | 0.061  | 0.0026 | 0.6107 | 0.0245 | 0.0704 | 0.0012 | 639  | 57  | 484  | 15 | 439  | 7  | 0.09  |
| QMG1106-50 | 629 | 124 | 0.2 | 0.0536 | 0.0024 | 0.343  | 0.0144 | 0.045  | 0.0008 | 356  | 64  | 299  | 11 | 284  | 5  | 0.11  |
| QMG1106-51 | 596 | 470 | 0.8 | 0.0595 | 0.0017 | 0.5955 | 0.016  | 0.0703 | 0.001  | 587  | 35  | 474  | 10 | 438  | 6  | 0.17  |
| QMG1106-52 | 180 | 96  | 0.5 | 0.0584 | 0.005  | 0.6164 | 0.0513 | 0.0765 | 0.0016 | 546  | 194 | 488  | 32 | 475  | 10 | 0.00  |
| QMG1106-53 | 62  | 71  | 1.1 | 0.1177 | 0.0094 | 3.8314 | 0.2894 | 0.236  | 0.0063 | 1922 | 148 | 1599 | 61 | 1366 | 33 | 0.00  |
| QMG1106-54 | 190 | 105 | 0.6 | 0.0594 | 0.0029 | 0.6268 | 0.0293 | 0.0742 | 0.0014 | 583  | 69  | 494  | 18 | 461  | 8  | 0.07  |
| QMG1106-55 | 136 | 71  | 0.5 | 0.116  | 0.0044 | 5.4035 | 0.1822 | 0.3379 | 0.0056 | 1895 | 69  | 1885 | 29 | 1876 | 27 | 0.00  |
| QMG1106-56 | 509 | 260 | 0.5 | 0.0506 | 0.0023 | 0.3239 | 0.0138 | 0.045  | 0.0008 | 223  | 68  | 285  | 11 | 284  | 5  | 0.09  |
| QMG1106-57 | 109 | 145 | 1.3 | 0.0595 | 0.0074 | 0.783  | 0.0952 | 0.0955 | 0.0023 | 584  | 280 | 587  | 54 | 588  | 14 | 0.00  |
| QMG1106-58 | 55  | 42  | 0.8 | 0.1512 | 0.0057 | 9.535  | 0.3355 | 0.4436 | 0.0103 | 2359 | 31  | 2391 | 32 | 2367 | 46 | 0.22  |
| QMG1106-59 | 236 | 88  | 0.4 | 0.111  | 0.0039 | 4.5598 | 0.1501 | 0.289  | 0.0055 | 1815 | 33  | 1742 | 27 | 1637 | 28 | 0.17  |
| QMG1106-60 | 212 | 142 | 0.7 | 0.0461 | 0.005  | 0.287  | 0.0305 | 0.0452 | 0.0012 |      | 220 | 256  | 24 | 285  | 7  | 0.02  |
| QMG1106-61 | 351 | 253 | 0.7 | 0.0782 | 0.0017 | 2.1903 | 0.0451 | 0.1971 | 0.0026 | 1151 | 21  | 1178 | 14 | 1160 | 14 | 0.24  |
| QMG1106-62 | 98  | 97  | 1   | 0.0682 | 0.0033 | 1.38   | 0.0638 | 0.1423 | 0.0029 | 874  | 62  | 880  | 27 | 858  | 16 | 0.10  |
| QMG1106-63 | 434 | 60  | 0.1 | 0.1208 | 0.002  | 6.1898 | 0.0986 | 0.3603 | 0.0047 | 1969 | 13  | 2003 | 14 | 1984 | 22 | 0.34  |
| QMG1106-64 | 441 | 130 | 0.3 | 0.0675 | 0.0027 | 1.3496 | 0.0507 | 0.145  | 0.0022 | 853  | 86  | 867  | 22 | 873  | 12 | 0.01  |
| QMG1106-65 | 637 | 174 | 0.3 | 0.0606 | 0.0024 | 0.5436 | 0.0205 | 0.065  | 0.0009 | 626  | 89  | 441  | 13 | 406  | 6  | 0.00  |
| QMG1106-66 | 645 | 402 | 0.6 | 0.0566 | 0.003  | 0.5434 | 0.0278 | 0.0697 | 0.001  | 475  | 121 | 441  | 18 | 434  | 6  | 0.00  |
| QMG1106-67 | 344 | 174 | 0.5 | 0.0568 | 0.0022 | 0.573  | 0.0212 | 0.071  | 0.0011 | 482  | 53  | 460  | 14 | 442  | 7  | 0.09  |
| QMG1106-68 | 200 | 142 | 0.7 | 0.0547 | 0.003  | 0.5046 | 0.026  | 0.0648 | 0.0013 | 401  | 80  | 415  | 18 | 405  | 8  | 0.07  |
| QMG1106-69 | 619 | 260 | 0.4 | 0.0544 | 0.0032 | 0.3396 | 0.0193 | 0.0453 | 0.0007 | 388  | 136 | 297  | 15 | 285  | 5  | -0.01 |
| QMG1106-70 | 215 | 49  | 0.2 | 0.0831 | 0.0029 | 2.2922 | 0.0718 | 0.2002 | 0.003  | 1270 | 69  | 1210 | 22 | 1176 | 16 | -0.01 |
| QMG1106-71 | 439 | 301 | 0.7 | 0.0643 | 0.0032 | 1.0976 | 0.0513 | 0.1239 | 0.0018 | 751  | 106 | 752  | 25 | 753  | 10 | 0.00  |

|            |      |      |     |        |        |        |        |        |        |      |     |      |    |      |    |      |
|------------|------|------|-----|--------|--------|--------|--------|--------|--------|------|-----|------|----|------|----|------|
| QMG1106-72 | 329  | 229  | 0.7 | 0.0505 | 0.0028 | 0.3234 | 0.017  | 0.0451 | 0.0009 | 218  | 86  | 285  | 13 | 284  | 5  | 0.07 |
| QMG1106-73 | 124  | 114  | 0.9 | 0.0657 | 0.0044 | 1.3271 | 0.0841 | 0.1422 | 0.0037 | 795  | 90  | 858  | 37 | 857  | 21 | 0.08 |
| QMG1106-74 | 183  | 189  | 1   | 0.0865 | 0.005  | 2.8909 | 0.1605 | 0.2425 | 0.0043 | 1349 | 116 | 1380 | 42 | 1400 | 22 | 0.00 |
| QMG1106-75 | 866  | 351  | 0.4 | 0.0621 | 0.0016 | 0.6126 | 0.015  | 0.0694 | 0.0009 | 678  | 30  | 485  | 9  | 432  | 6  | 0.18 |
| QMG1106-76 | 765  | 407  | 0.5 | 0.0563 | 0.0025 | 0.5656 | 0.0237 | 0.0729 | 0.001  | 463  | 100 | 455  | 15 | 454  | 6  | 0.00 |
| QMG1106-77 | 312  | 155  | 0.5 | 0.0645 | 0.0029 | 0.5248 | 0.0221 | 0.0572 | 0.001  | 759  | 58  | 428  | 15 | 359  | 6  | 0.08 |
| QMG1106-78 | 203  | 110  | 0.5 | 0.057  | 0.0038 | 0.3663 | 0.0233 | 0.0452 | 0.001  | 491  | 99  | 317  | 17 | 285  | 6  | 0.04 |
| QMG1106-79 | 1561 | 1981 | 1.3 | 0.0693 | 0.0016 | 0.3831 | 0.0083 | 0.0389 | 0.0005 | 908  | 25  | 329  | 6  | 246  | 3  | 0.19 |
| QMG1106-80 | 211  | 61   | 0.3 | 0.1613 | 0.0036 | 10.844 | 0.2249 | 0.4727 | 0.0077 | 2469 | 16  | 2510 | 19 | 2496 | 34 | 0.31 |

|            |      |     |     |        |        |        |        |        |        |      |     |      |    |      |    |      |
|------------|------|-----|-----|--------|--------|--------|--------|--------|--------|------|-----|------|----|------|----|------|
| QMG1112-01 | 65   | 58  | 0.9 | 0.0626 | 0.0036 | 0.6111 | 0.0336 | 0.0686 | 0.0015 | 696  | 80  | 484  | 21 | 428  | 9  | 0.07 |
| QMG1112-02 | 1111 | 133 | 0.1 | 0.0563 | 0.0057 | 0.332  | 0.0335 | 0.0428 | 0.0007 | 462  | 232 | 291  | 26 | 270  | 4  | 0.01 |
| QMG1112-03 | 260  | 154 | 0.6 | 0.0551 | 0.0021 | 0.5128 | 0.0185 | 0.0655 | 0.0011 | 415  | 52  | 420  | 12 | 409  | 6  | 0.13 |
| QMG1112-04 | 179  | 99  | 0.6 | 0.0755 | 0.0027 | 1.9305 | 0.0629 | 0.1856 | 0.0026 | 1081 | 73  | 1092 | 22 | 1097 | 14 | 0.01 |
| QMG1112-05 | 344  | 101 | 0.3 | 0.0541 | 0.0016 | 0.5285 | 0.0146 | 0.0687 | 0.001  | 375  | 37  | 431  | 10 | 428  | 6  | 0.18 |
| QMG1112-06 | 333  | 481 | 1.4 | 0.1636 | 0.0047 | 10.187 | 0.2519 | 0.4517 | 0.0064 | 2493 | 49  | 2452 | 23 | 2403 | 28 | 0.00 |
| QMG1112-07 | 124  | 73  | 0.6 | 0.055  | 0.0031 | 0.5414 | 0.0289 | 0.0692 | 0.0014 | 414  | 83  | 439  | 19 | 431  | 9  | 0.07 |
| QMG1112-08 | 247  | 130 | 0.5 | 0.055  | 0.002  | 0.5395 | 0.0188 | 0.0691 | 0.0011 | 411  | 50  | 438  | 12 | 430  | 7  | 0.13 |
| QMG1112-09 | 193  | 136 | 0.7 | 0.0537 | 0.0027 | 0.3871 | 0.0186 | 0.0507 | 0.001  | 358  | 74  | 332  | 14 | 319  | 6  | 0.09 |
| QMG1112-10 | 275  | 333 | 1.2 | 0.0706 | 0.0014 | 1.3416 | 0.0258 | 0.1337 | 0.0017 | 945  | 20  | 864  | 11 | 809  | 10 | 0.26 |
| QMG1112-11 | 399  | 179 | 0.4 | 0.0528 | 0.0027 | 0.3272 | 0.016  | 0.0449 | 0.0007 | 321  | 119 | 287  | 12 | 283  | 4  | 0.01 |
| QMG1112-12 | 521  | 300 | 0.6 | 0.0574 | 0.0014 | 0.5702 | 0.0135 | 0.0698 | 0.0009 | 508  | 29  | 458  | 9  | 435  | 6  | 0.19 |
| QMG1112-13 | 247  | 111 | 0.5 | 0.0598 | 0.0021 | 0.592  | 0.02   | 0.0696 | 0.0011 | 597  | 46  | 472  | 13 | 434  | 7  | 0.13 |
| QMG1112-14 | 630  | 215 | 0.3 | 0.0558 | 0.0024 | 0.358  | 0.0145 | 0.0452 | 0.0008 | 443  | 59  | 311  | 11 | 285  | 5  | 0.10 |
| QMG1112-15 | 337  | 147 | 0.4 | 0.071  | 0.0016 | 1.7214 | 0.0363 | 0.1705 | 0.0023 | 958  | 22  | 1017 | 14 | 1015 | 13 | 0.24 |

|            |      |      |     |        |        |        |        |        |        |      |     |      |    |      |    |       |
|------------|------|------|-----|--------|--------|--------|--------|--------|--------|------|-----|------|----|------|----|-------|
| QMG1112-16 | 982  | 487  | 0.5 | 0.052  | 0.0027 | 0.3105 | 0.0154 | 0.0433 | 0.0006 | 284  | 121 | 275  | 12 | 273  | 4  | -0.02 |
| QMG1112-17 | 368  | 453  | 1.2 | 0.0567 | 0.0037 | 0.5479 | 0.035  | 0.0701 | 0.0011 | 481  | 149 | 444  | 23 | 436  | 6  | 0.00  |
| QMG1112-18 | 1007 | 1081 | 1.1 | 0.0582 | 0.0012 | 0.6146 | 0.0122 | 0.0743 | 0.0009 | 537  | 23  | 486  | 8  | 462  | 6  | 0.23  |
| QMG1112-19 | 570  | 414  | 0.7 | 0.056  | 0.0013 | 0.5666 | 0.0123 | 0.0711 | 0.0009 | 453  | 26  | 456  | 8  | 443  | 6  | 0.21  |
| QMG1112-20 | 196  | 193  | 1   | 0.0592 | 0.0025 | 0.5846 | 0.0234 | 0.0694 | 0.0012 | 576  | 56  | 467  | 15 | 433  | 7  | 0.10  |
| QMG1112-21 | 291  | 162  | 0.6 | 0.0543 | 0.0019 | 0.53   | 0.0179 | 0.0686 | 0.0011 | 384  | 48  | 432  | 12 | 428  | 6  | 0.15  |
| QMG1112-22 | 1278 | 781  | 0.6 | 0.0654 | 0.003  | 0.265  | 0.0116 | 0.0294 | 0.0004 | 787  | 100 | 239  | 9  | 187  | 3  | -0.04 |
| QMG1112-23 | 221  | 115  | 0.5 | 0.0556 | 0.0023 | 0.5793 | 0.0226 | 0.0733 | 0.0012 | 435  | 57  | 464  | 15 | 456  | 7  | 0.11  |
| QMG1112-24 | 339  | 328  | 1   | 0.1944 | 0.0045 | 14.421 | 0.2691 | 0.5382 | 0.0074 | 2779 | 39  | 2778 | 18 | 2776 | 31 | 0.00  |
| QMG1112-25 | 353  | 152  | 0.4 | 0.0526 | 0.0025 | 0.3772 | 0.0172 | 0.0505 | 0.0009 | 309  | 71  | 325  | 13 | 317  | 6  | 0.07  |
| QMG1112-26 | 163  | 157  | 1   | 0.1808 | 0.0044 | 11.566 | 0.2293 | 0.4639 | 0.0064 | 2660 | 41  | 2570 | 19 | 2457 | 28 | 0.00  |
| QMG1112-27 | 195  | 60   | 0.3 | 0.0542 | 0.0023 | 0.4986 | 0.0203 | 0.0647 | 0.0011 | 379  | 61  | 411  | 14 | 404  | 7  | 0.09  |
| QMG1112-28 | 100  | 76   | 0.8 | 0.1583 | 0.0022 | 10.624 | 0.1431 | 0.4721 | 0.0062 | 2437 | 10  | 2491 | 13 | 2493 | 27 | 0.43  |
| QMG1112-29 | 716  | 145  | 0.2 | 0.0792 | 0.0015 | 2.0823 | 0.0309 | 0.1906 | 0.0022 | 1178 | 38  | 1143 | 10 | 1125 | 12 | 0.01  |
| QMG1112-30 | 1088 | 337  | 0.3 | 0.0583 | 0.0028 | 0.3388 | 0.0154 | 0.0422 | 0.0006 | 540  | 107 | 296  | 12 | 266  | 4  | 0.01  |
| QMG1112-31 | 145  | 111  | 0.8 | 0.0673 | 0.0019 | 1.3142 | 0.0354 | 0.1373 | 0.002  | 847  | 32  | 852  | 16 | 829  | 11 | 0.18  |
| QMG1112-32 | 150  | 92   | 0.6 | 0.0562 | 0.0025 | 0.5242 | 0.0223 | 0.0656 | 0.0012 | 461  | 63  | 428  | 15 | 409  | 7  | 0.11  |
| QMG1112-33 | 104  | 87   | 0.8 | 0.0534 | 0.0026 | 0.4954 | 0.0233 | 0.0652 | 0.0012 | 346  | 73  | 409  | 16 | 407  | 7  | 0.08  |
| QMG1112-34 | 710  | 694  | 1   | 0.0635 | 0.0013 | 0.6429 | 0.0123 | 0.0712 | 0.0009 | 725  | 21  | 504  | 8  | 443  | 5  | 0.25  |
| QMG1112-35 | 43   | 5    | 0.1 | 0.0569 | 0.0059 | 0.7467 | 0.0747 | 0.0922 | 0.0031 | 489  | 162 | 566  | 43 | 569  | 19 | 0.04  |
| QMG1112-36 | 196  | 119  | 0.6 | 0.0879 | 0.0018 | 3.1294 | 0.06   | 0.2504 | 0.0034 | 1380 | 18  | 1440 | 15 | 1441 | 17 | 0.28  |
| QMG1112-37 | 357  | 232  | 0.7 | 0.0576 | 0.0014 | 0.5651 | 0.0135 | 0.069  | 0.0009 | 513  | 30  | 455  | 9  | 430  | 6  | 0.20  |
| QMG1112-38 | 343  | 259  | 0.8 | 0.0542 | 0.0021 | 0.3814 | 0.0143 | 0.0495 | 0.0008 | 381  | 55  | 328  | 10 | 311  | 5  | 0.11  |
| QMG1112-39 | 144  | 113  | 0.8 | 0.0657 | 0.0018 | 1.2984 | 0.0344 | 0.139  | 0.002  | 796  | 32  | 845  | 15 | 839  | 11 | 0.18  |
| QMG1112-40 | 175  | 91   | 0.5 | 0.0548 | 0.0025 | 0.5005 | 0.0214 | 0.0643 | 0.0011 | 403  | 64  | 412  | 14 | 401  | 7  | 0.08  |

|            |     |     |     |        |        |        |        |        |        |      |     |      |    |      |    |       |
|------------|-----|-----|-----|--------|--------|--------|--------|--------|--------|------|-----|------|----|------|----|-------|
| QMG1112-41 | 940 | 629 | 0.7 | 0.0581 | 0.0034 | 0.4445 | 0.0251 | 0.0555 | 0.0009 | 532  | 132 | 373  | 18 | 348  | 5  | 0.01  |
| QMG1112-42 | 237 | 197 | 0.8 | 0.0838 | 0.0015 | 2.7098 | 0.0466 | 0.2273 | 0.0029 | 1289 | 16  | 1331 | 13 | 1320 | 15 | 0.31  |
| QMG1112-43 | 451 | 262 | 0.6 | 0.0559 | 0.0013 | 0.5646 | 0.0125 | 0.071  | 0.0009 | 449  | 27  | 455  | 8  | 442  | 5  | 0.21  |
| QMG1112-44 | 148 | 149 | 1   | 0.0578 | 0.0022 | 0.811  | 0.0294 | 0.0987 | 0.0016 | 521  | 51  | 603  | 16 | 607  | 9  | 0.12  |
| QMG1112-45 | 329 | 197 | 0.6 | 0.0536 | 0.0022 | 0.4541 | 0.0179 | 0.0596 | 0.001  | 353  | 59  | 380  | 12 | 373  | 6  | 0.10  |
| QMG1112-46 | 400 | 91  | 0.2 | 0.1277 | 0.0022 | 5.9905 | 0.0766 | 0.3402 | 0.004  | 2067 | 31  | 1974 | 11 | 1888 | 19 | 0.01  |
| QMG1112-47 | 279 | 167 | 0.6 | 0.1176 | 0.0027 | 5.612  | 0.1084 | 0.3461 | 0.0043 | 1920 | 42  | 1918 | 17 | 1916 | 21 | 0.00  |
| QMG1112-48 | 270 | 113 | 0.4 | 0.0537 | 0.002  | 0.4709 | 0.0167 | 0.0617 | 0.001  | 358  | 52  | 392  | 12 | 386  | 6  | 0.14  |
| QMG1112-49 | 271 | 214 | 0.8 | 0.0567 | 0.0019 | 0.5587 | 0.0177 | 0.0692 | 0.001  | 481  | 44  | 451  | 12 | 432  | 6  | 0.13  |
| QMG1112-50 | 224 | 173 | 0.8 | 0.0617 | 0.0022 | 0.6101 | 0.0209 | 0.0695 | 0.0011 | 663  | 46  | 484  | 13 | 433  | 7  | 0.12  |
| QMG1112-51 | 360 | 130 | 0.4 | 0.067  | 0.002  | 1.2781 | 0.0352 | 0.1383 | 0.0017 | 838  | 65  | 836  | 16 | 835  | 10 | -0.01 |
| QMG1112-52 | 510 | 221 | 0.4 | 0.0583 | 0.0015 | 0.5821 | 0.014  | 0.0702 | 0.0009 | 541  | 30  | 466  | 9  | 437  | 6  | 0.17  |
| QMG1112-53 | 454 | 235 | 0.5 | 0.0558 | 0.0014 | 0.514  | 0.0122 | 0.0648 | 0.0009 | 443  | 30  | 421  | 8  | 405  | 5  | 0.22  |
| QMG1112-54 | 139 | 81  | 0.6 | 0.0563 | 0.0045 | 0.4968 | 0.0383 | 0.064  | 0.0013 | 463  | 182 | 410  | 26 | 400  | 8  | 0.01  |
| QMG1112-55 | 182 | 85  | 0.5 | 0.1121 | 0.0019 | 5.3173 | 0.0833 | 0.3334 | 0.0043 | 1834 | 13  | 1872 | 13 | 1855 | 21 | 0.35  |
| QMG1112-56 | 347 | 155 | 0.4 | 0.0662 | 0.0013 | 1.2757 | 0.0246 | 0.1355 | 0.0017 | 812  | 21  | 835  | 11 | 819  | 10 | 0.25  |
| QMG1112-57 | 384 | 108 | 0.3 | 0.0533 | 0.0022 | 0.3432 | 0.0136 | 0.0453 | 0.0008 | 341  | 60  | 300  | 10 | 285  | 5  | 0.12  |
| QMG1112-58 | 477 | 232 | 0.5 | 0.0618 | 0.0017 | 0.6133 | 0.0165 | 0.0698 | 0.001  | 666  | 34  | 486  | 10 | 435  | 6  | 0.18  |
| QMG1112-59 | 263 | 149 | 0.6 | 0.056  | 0.0035 | 0.5252 | 0.0312 | 0.068  | 0.0011 | 454  | 141 | 429  | 21 | 424  | 7  | 0.00  |
| QMG1112-60 | 276 | 150 | 0.5 | 0.0511 | 0.0022 | 0.3742 | 0.0155 | 0.0515 | 0.0009 | 243  | 64  | 323  | 11 | 324  | 5  | 0.11  |
| QMG1112-61 | 432 | 389 | 0.9 | 0.0668 | 0.0017 | 0.6544 | 0.0155 | 0.0689 | 0.0009 | 830  | 28  | 511  | 10 | 430  | 6  | 0.17  |
| QMG1112-62 | 151 | 94  | 0.6 | 0.0771 | 0.002  | 2.1713 | 0.0537 | 0.1981 | 0.0029 | 1122 | 27  | 1172 | 17 | 1165 | 15 | 0.20  |
| QMG1112-63 | 327 | 144 | 0.4 | 0.0657 | 0.0034 | 1.0467 | 0.0518 | 0.1156 | 0.0018 | 796  | 112 | 727  | 26 | 705  | 11 | 0.00  |
| QMG1112-64 | 56  | 42  | 0.8 | 0.0648 | 0.003  | 1.2481 | 0.0558 | 0.1354 | 0.0027 | 768  | 61  | 823  | 25 | 819  | 15 | 0.11  |
| QMG1112-65 | 659 | 257 | 0.4 | 0.0553 | 0.0012 | 0.5441 | 0.0112 | 0.0692 | 0.0009 | 423  | 25  | 441  | 7  | 431  | 5  | 0.24  |

|            |      |      |     |        |        |        |        |        |        |      |     |      |    |      |    |       |
|------------|------|------|-----|--------|--------|--------|--------|--------|--------|------|-----|------|----|------|----|-------|
| QMG1112-66 | 1018 | 601  | 0.6 | 0.0636 | 0.0014 | 0.6258 | 0.0128 | 0.0692 | 0.0009 | 729  | 23  | 493  | 8  | 431  | 5  | 0.25  |
| QMG1112-67 | 147  | 63   | 0.4 | 0.0595 | 0.0054 | 0.3692 | 0.0322 | 0.045  | 0.0011 | 586  | 203 | 319  | 24 | 284  | 6  | 0.02  |
| QMG1112-68 | 175  | 118  | 0.7 | 0.0947 | 0.0031 | 3.5624 | 0.1065 | 0.2728 | 0.0037 | 1522 | 63  | 1541 | 24 | 1555 | 19 | -0.01 |
| QMG1112-69 | 203  | 85   | 0.4 | 0.0914 | 0.0032 | 2.9217 | 0.0939 | 0.232  | 0.0033 | 1454 | 69  | 1388 | 24 | 1345 | 17 | 0.00  |
| QMG1112-70 | 552  | 723  | 1.3 | 0.0789 | 0.0031 | 0.4951 | 0.0182 | 0.0441 | 0.0008 | 1170 | 45  | 408  | 12 | 278  | 5  | 0.11  |
| QMG1112-71 | 179  | 54   | 0.3 | 0.114  | 0.0017 | 5.5255 | 0.0783 | 0.3407 | 0.0043 | 1864 | 11  | 1905 | 12 | 1890 | 20 | 0.39  |
| QMG1112-72 | 266  | 177  | 0.7 | 0.0753 | 0.0014 | 2.0525 | 0.0359 | 0.1917 | 0.0024 | 1077 | 17  | 1133 | 12 | 1130 | 13 | 0.29  |
| QMG1112-73 | 58   | 78   | 1.3 | 0.0624 | 0.0037 | 1.0903 | 0.0618 | 0.1228 | 0.0028 | 688  | 82  | 749  | 30 | 747  | 16 | 0.08  |
| QMG1112-74 | 339  | 142  | 0.4 | 0.1359 | 0.0026 | 7.5189 | 0.1131 | 0.4012 | 0.0048 | 2176 | 34  | 2175 | 13 | 2174 | 22 | 0.00  |
| QMG1112-75 | 639  | 400  | 0.6 | 0.0589 | 0.0019 | 0.3875 | 0.0119 | 0.0463 | 0.0007 | 563  | 42  | 333  | 9  | 292  | 4  | 0.14  |
| QMG1112-76 | 270  | 156  | 0.6 | 0.058  | 0.0027 | 0.5716 | 0.025  | 0.0693 | 0.0013 | 529  | 64  | 459  | 16 | 432  | 8  | 0.10  |
| QMG1112-77 | 560  | 360  | 0.6 | 0.0528 | 0.0014 | 0.5196 | 0.013  | 0.0692 | 0.0009 | 321  | 33  | 425  | 9  | 431  | 5  | 0.17  |
| QMG1112-78 | 261  | 247  | 0.9 | 0.0759 | 0.0019 | 2.0833 | 0.0496 | 0.1929 | 0.0027 | 1093 | 26  | 1143 | 16 | 1137 | 15 | 0.20  |
| QMG1112-79 | 477  | 245  | 0.5 | 0.0759 | 0.0011 | 2.1072 | 0.0285 | 0.1951 | 0.0023 | 1093 | 12  | 1151 | 9  | 1149 | 12 | 0.39  |
| QMG1112-80 | 2105 | 1000 | 0.5 | 0.0557 | 0.0024 | 0.2423 | 0.01   | 0.0316 | 0.0004 | 439  | 99  | 220  | 8  | 200  | 3  | -0.01 |

*Li et al. (2013)*

| Spots    | Th/U | Isotopic ratios                      |        |                                     |       |                                     |        | Apparent age (Ma)                    |    |                                     |    |                                     |    | RHO  |
|----------|------|--------------------------------------|--------|-------------------------------------|-------|-------------------------------------|--------|--------------------------------------|----|-------------------------------------|----|-------------------------------------|----|------|
|          |      | <sup>207</sup> Pb/ <sup>206</sup> Pb | 1σ     | <sup>207</sup> Pb/ <sup>235</sup> U | 1σ    | <sup>206</sup> Pb/ <sup>238</sup> U | 1σ     | <sup>207</sup> Pb/ <sup>206</sup> Pb | 1σ | <sup>207</sup> Pb/ <sup>235</sup> U | 1σ | <sup>206</sup> Pb/ <sup>238</sup> U | 1σ |      |
| Yg050409 |      |                                      |        |                                     |       |                                     |        |                                      |    |                                     |    |                                     |    |      |
| 1        | 0.40 | 0.1119                               | 0.0002 | 4.984                               | 0.041 | 0.3231                              | 0.0026 | 1830                                 | 4  | 1816                                | 7  | 1806                                | 13 | 0.97 |
| 2        | 0.20 | 0.0558                               | 8E-05  | 0.532                               | 0.005 | 0.0692                              | 0.0007 | 443                                  | 3  | 433                                 | 4  | 431                                 | 4  | 0.99 |
| 3        | 0.31 | 0.0675                               | 0.0001 | 1.273                               | 0.019 | 0.1368                              | 0.0021 | 853                                  | 3  | 834                                 | 9  | 827                                 | 12 | 0.99 |
| 4        | 0.53 | 0.0554                               | 8E-05  | 0.506                               | 0.005 | 0.0663                              | 0.0007 | 429                                  | 3  | 416                                 | 3  | 414                                 | 4  | 0.99 |
| 5        | 0.28 | 0.0794                               | 0.0001 | 1.919                               | 0.016 | 0.1754                              | 0.0014 | 1181                                 | 3  | 1088                                | 5  | 1042                                | 8  | 0.99 |
| 6        | 0.34 | 0.0523                               | 0.0001 | 0.332                               | 0.004 | 0.046                               | 0.0005 | 299                                  | 5  | 291                                 | 3  | 290                                 | 3  | 0.99 |
| 7        | 0.13 | 0.0754                               | 0.0004 | 1.39                                | 0.02  | 0.1337                              | 0.0017 | 1080                                 | 11 | 885                                 | 8  | 809                                 | 10 | 0.93 |
| 8        | 0.41 | 0.0523                               | 0.0003 | 0.278                               | 0.004 | 0.0386                              | 0.0005 | 299                                  | 12 | 249                                 | 3  | 244                                 | 3  | 0.92 |
| 9        | 0.28 | 0.0532                               | 0.0002 | 0.3                                 | 0.004 | 0.0409                              | 0.0005 | 335                                  | 6  | 266                                 | 3  | 259                                 | 3  | 0.98 |
| 10       | 0.30 | 0.0522                               | 0.0001 | 0.308                               | 0.004 | 0.0428                              | 0.0005 | 296                                  | 6  | 273                                 | 3  | 271                                 | 3  | 0.99 |
| 11       | 0.25 | 0.0526                               | 0.0003 | 0.31                                | 0.004 | 0.0428                              | 0.0005 | 312                                  | 14 | 274                                 | 3  | 270                                 | 3  | 0.88 |
| 12       | 0.27 | 0.0562                               | 0.0001 | 0.569                               | 0.008 | 0.0734                              | 0.001  | 461                                  | 5  | 457                                 | 5  | 457                                 | 6  | 0.99 |
| 13       | 0.30 | 0.0664                               | 0.0001 | 1.038                               | 0.012 | 0.1135                              | 0.0012 | 817                                  | 4  | 723                                 | 6  | 694                                 | 7  | 0.99 |
| 14       | 0.39 | 0.0528                               | 0.0003 | 0.302                               | 0.004 | 0.0415                              | 0.0005 | 320                                  | 11 | 268                                 | 3  | 263                                 | 3  | 0.93 |
| 15       | 0.35 | 0.0561                               | 0.0001 | 0.561                               | 0.005 | 0.0725                              | 0.0006 | 457                                  | 4  | 452                                 | 3  | 452                                 | 4  | 0.98 |
| 16       | 0.43 | 0.0557                               | 0.0001 | 0.558                               | 0.007 | 0.0726                              | 0.0008 | 441                                  | 4  | 450                                 | 4  | 452                                 | 5  | 1.00 |
| 17       | 0.40 | 0.0552                               | 0.0001 | 0.515                               | 0.006 | 0.0676                              | 0.0008 | 421                                  | 5  | 422                                 | 4  | 422                                 | 5  | 0.98 |
| 18       | 0.40 | 0.0555                               | 0.0001 | 0.532                               | 0.006 | 0.0694                              | 0.0008 | 434                                  | 4  | 433                                 | 4  | 433                                 | 5  | 0.99 |
| 19       | 0.40 | 0.1038                               | 0.0001 | 4.45                                | 0.035 | 0.3108                              | 0.0024 | 1694                                 | 2  | 1721                                | 7  | 1746                                | 12 | 0.99 |
| 20       | 0.35 | 0.055                                | 0.0005 | 0.32                                | 0.005 | 0.0421                              | 0.0006 | 413                                  | 19 | 282                                 | 4  | 266                                 | 4  | 0.83 |
| 21       | 0.31 | 0.0516                               | 0.0001 | 0.305                               | 0.004 | 0.0429                              | 0.0005 | 266                                  | 6  | 270                                 | 3  | 271                                 | 3  | 0.98 |
| 22       | 0.34 | 0.0522                               | 0.0001 | 0.308                               | 0.004 | 0.0429                              | 0.0005 | 293                                  | 6  | 273                                 | 3  | 271                                 | 3  | 0.99 |
| 23       | 0.36 | 0.0524                               | 9E-05  | 0.322                               | 0.005 | 0.0445                              | 0.0007 | 304                                  | 4  | 283                                 | 4  | 281                                 | 4  | 0.99 |
| 24       | 0.17 | 0.1302                               | 0.0002 | 6.264                               | 0.073 | 0.3489                              | 0.004  | 2101                                 | 3  | 2013                                | 10 | 1931                                | 19 | 0.99 |
| 25       | 0.54 | 0.1058                               | 0.0001 | 4.302                               | 0.045 | 0.2948                              | 0.003  | 1729                                 | 2  | 1693                                | 8  | 1667                                | 15 | 0.99 |
| 26       | 0.34 | 0.0522                               | 0.0002 | 0.302                               | 0.004 | 0.0419                              | 0.0005 | 296                                  | 7  | 268                                 | 3  | 265                                 | 3  | 0.97 |



|    |      |        |        |       |       |        |        |      |     |      |    |      |    |      |
|----|------|--------|--------|-------|-------|--------|--------|------|-----|------|----|------|----|------|
| 27 | 0.65 | 0.0659 | 0.0001 | 1.255 | 0.02  | 0.1382 | 0.0021 | 802  | 3   | 826  | 9  | 835  | 12 | 1.00 |
| 28 | 0.24 | 0.0526 | 0.0002 | 0.338 | 0.004 | 0.0466 | 0.0006 | 311  | 9   | 295  | 3  | 294  | 3  | 0.96 |
| 29 | 0.33 | 0.0522 | 0.0002 | 0.336 | 0.006 | 0.0467 | 0.0008 | 295  | 8   | 294  | 4  | 294  | 5  | 0.98 |
| 30 | 0.27 | 0.052  | 0.0002 | 0.354 | 0.005 | 0.0494 | 0.0006 | 286  | 7   | 308  | 4  | 311  | 4  | 0.99 |
| 31 | 0.28 | 0.0523 | 0.0002 | 0.31  | 0.003 | 0.0431 | 0.0004 | 297  | 9   | 274  | 2  | 272  | 3  | 0.91 |
| 32 | 0.32 | 0.0532 | 0.0002 | 0.322 | 0.004 | 0.0439 | 0.0005 | 336  | 8   | 283  | 3  | 277  | 3  | 0.96 |
| 33 | 0.38 | 0.0525 | 9E-05  | 0.303 | 0.004 | 0.0419 | 0.0005 | 305  | 4   | 269  | 3  | 265  | 3  | 1.00 |
| 34 | 0.81 | 0.0611 | 0.0003 | 0.513 | 0.005 | 0.0609 | 0.0005 | 644  | 9   | 421  | 3  | 381  | 3  | 0.90 |
| 35 | 0.24 | 0.0524 | 0.0002 | 0.3   | 0.004 | 0.0415 | 0.0005 | 302  | 8   | 266  | 3  | 262  | 3  | 0.96 |
| 36 | 0.39 | 0.0553 | 0.0002 | 0.589 | 0.007 | 0.0773 | 0.001  | 422  | 6   | 470  | 5  | 481  | 6  | 0.98 |
| 37 | 0.36 | 0.0525 | 0.0002 | 0.291 | 0.003 | 0.0403 | 0.0004 | 307  | 8   | 260  | 3  | 255  | 3  | 0.94 |
| 38 | 0.30 | 0.0734 | 0.0006 | 1.089 | 0.014 | 0.1076 | 0.001  | 1025 | 17  | 748  | 7  | 659  | 6  | 0.76 |
| 39 | 0.75 | 0.0564 | 0.0001 | 0.534 | 0.008 | 0.0687 | 0.001  | 467  | 4   | 434  | 5  | 429  | 6  | 0.99 |
| 40 | 0.63 | 0.0663 | 0.0002 | 1.276 | 0.021 | 0.1396 | 0.0023 | 816  | 5   | 835  | 9  | 843  | 13 | 0.99 |
| 41 | 0.22 | 0.0528 | 0.0002 | 0.326 | 0.004 | 0.0448 | 0.0005 | 318  | 6   | 286  | 3  | 283  | 3  | 0.97 |
| 42 | 0.16 | 0.0674 | 0.0001 | 1.32  | 0.018 | 0.142  | 0.0019 | 851  | 3   | 854  | 8  | 856  | 11 | 0.99 |
| 43 | 0.11 | 0.1083 | 0.0001 | 4.898 | 0.049 | 0.3279 | 0.0033 | 1771 | 2   | 1802 | 8  | 1830 | 16 | 0.99 |
| 44 | 0.35 | 0.0526 | 0.0003 | 0.29  | 0.003 | 0.04   | 0.0004 | 310  | 11  | 258  | 2  | 253  | 2  | 0.89 |
| 45 | 0.30 | 0.0518 | 0.0002 | 0.289 | 0.003 | 0.0406 | 0.0004 | 275  | 9   | 258  | 2  | 257  | 3  | 0.92 |
| 46 | 0.28 | 0.0519 | 0.0002 | 0.306 | 0.004 | 0.0427 | 0.0005 | 283  | 8   | 271  | 3  | 270  | 3  | 0.97 |
| 47 | 0.29 | 0.0525 | 0.0002 | 0.324 | 0.004 | 0.0448 | 0.0006 | 306  | 9   | 285  | 3  | 283  | 3  | 0.96 |
| 48 | 0.37 | 0.0726 | 0.0001 | 1.673 | 0.018 | 0.1671 | 0.0018 | 1003 | 3   | 998  | 7  | 997  | 10 | 0.99 |
| 49 | 0.81 | 0.0647 | 0.0002 | 0.86  | 0.008 | 0.0964 | 0.0008 | 764  | 8   | 630  | 4  | 594  | 5  | 0.92 |
| 50 | 0.45 | 0.052  | 0.0014 | 0.324 | 0.009 | 0.0452 | 0.0004 | 284  | 61  | 285  | 8  | 285  | 3  | 0.25 |
| 51 | 0.60 | 0.0517 | 0.0011 | 0.321 | 0.007 | 0.045  | 0.0003 | 274  | 50  | 283  | 6  | 284  | 2  | 0.23 |
| 52 | 0.81 | 0.0527 | 0.0011 | 0.328 | 0.007 | 0.0452 | 0.0004 | 314  | 48  | 288  | 6  | 285  | 2  | 0.26 |
| 53 | 1.05 | 0.0564 | 0.0003 | 0.537 | 0.006 | 0.069  | 0.0007 | 469  | 11  | 436  | 5  | 430  | 4  | 0.90 |
| 54 | 0.60 | 0.0507 | 0.0028 | 0.315 | 0.018 | 0.0451 | 0.0003 | 228  | 128 | 278  | 16 | 284  | 2  | 0.34 |
| 55 | 0.54 | 0.051  | 0.0052 | 0.31  | 0.032 | 0.0441 | 0.0006 | 240  | 236 | 274  | 28 | 278  | 4  | 0.16 |
| 56 | 0.76 | 0.0535 | 0.0009 | 0.323 | 0.006 | 0.0438 | 0.0003 | 348  | 38  | 284  | 5  | 276  | 2  | 0.45 |
| 57 | 0.58 | 0.0532 | 0.0029 | 0.322 | 0.018 | 0.0439 | 0.0005 | 339  | 123 | 284  | 16 | 277  | 3  | 0.22 |

|    |      |       |        |       |       |        |        |     |    |     |    |     |   |      |
|----|------|-------|--------|-------|-------|--------|--------|-----|----|-----|----|-----|---|------|
| 58 | 0.78 | 0.057 | 0.0016 | 0.516 | 0.016 | 0.0657 | 0.0006 | 493 | 62 | 423 | 13 | 410 | 4 | 0.45 |
|----|------|-------|--------|-------|-------|--------|--------|-----|----|-----|----|-----|---|------|

Yg050412

|    |      |        |        |       |       |        |        |      |    |      |    |      |    |      |
|----|------|--------|--------|-------|-------|--------|--------|------|----|------|----|------|----|------|
| 1  | 0.36 | 0.0526 | 0.0001 | 0.327 | 0.004 | 0.0451 | 0.0006 | 313  | 5  | 288  | 3  | 285  | 4  | 0.98 |
| 2  | 0.28 | 0.052  | 0.0002 | 0.289 | 0.003 | 0.0403 | 0.0004 | 286  | 8  | 258  | 3  | 255  | 3  | 0.94 |
| 3  | 0.96 | 0.0551 | 0.0002 | 0.518 | 0.007 | 0.0681 | 0.0008 | 416  | 9  | 424  | 4  | 425  | 5  | 0.96 |
| 4  | 0.24 | 0.0527 | 0.0002 | 0.326 | 0.004 | 0.0449 | 0.0006 | 318  | 10 | 287  | 3  | 283  | 4  | 0.95 |
| 5  | 0.31 | 0.0527 | 0.0002 | 0.328 | 0.004 | 0.0452 | 0.0006 | 314  | 7  | 288  | 3  | 285  | 3  | 0.97 |
| 6  | 0.27 | 0.0518 | 0.0003 | 0.301 | 0.004 | 0.0421 | 0.0005 | 278  | 12 | 267  | 3  | 266  | 3  | 0.92 |
| 7  | 0.41 | 0.0668 | 0.0002 | 1.331 | 0.021 | 0.1445 | 0.0023 | 832  | 5  | 859  | 9  | 871  | 13 | 0.99 |
| 8  | 0.77 | 0.0575 | 0.0002 | 0.567 | 0.009 | 0.0715 | 0.001  | 510  | 9  | 456  | 6  | 446  | 6  | 0.97 |
| 9  | 0.49 | 0.0558 | 0.0001 | 0.53  | 0.006 | 0.0689 | 0.0008 | 442  | 4  | 432  | 4  | 430  | 5  | 0.99 |
| 10 | 0.24 | 0.0521 | 0.0002 | 0.346 | 0.005 | 0.0482 | 0.0007 | 290  | 8  | 302  | 4  | 304  | 4  | 0.97 |
| 11 | 0.35 | 0.1086 | 0.0001 | 4.94  | 0.084 | 0.3298 | 0.0056 | 1777 | 2  | 1809 | 14 | 1839 | 27 | 1.00 |
| 12 | 0.53 | 0.0709 | 0.0001 | 1.563 | 0.018 | 0.1599 | 0.0018 | 953  | 3  | 955  | 7  | 957  | 10 | 0.99 |
| 13 | 0.46 | 0.0555 | 0.0003 | 0.469 | 0.006 | 0.0613 | 0.0007 | 431  | 14 | 390  | 4  | 384  | 4  | 0.88 |
| 14 | 0.88 | 0.055  | 0.0002 | 0.503 | 0.007 | 0.0662 | 0.0008 | 414  | 8  | 413  | 5  | 414  | 5  | 0.97 |
| 15 | 1.02 | 0.0549 | 0.0002 | 0.526 | 0.007 | 0.0694 | 0.0009 | 409  | 8  | 429  | 4  | 433  | 5  | 0.97 |
| 16 | 0.38 | 0.0557 | 0.0003 | 0.558 | 0.007 | 0.0726 | 0.0008 | 441  | 10 | 450  | 5  | 452  | 5  | 0.94 |
| 17 | 0.39 | 0.0613 | 0.0003 | 0.917 | 0.014 | 0.1084 | 0.0015 | 650  | 10 | 660  | 7  | 664  | 9  | 0.95 |
| 18 | 0.75 | 0.0554 | 0.0001 | 0.554 | 0.008 | 0.0725 | 0.001  | 429  | 5  | 448  | 5  | 452  | 6  | 0.99 |
| 19 | 1    | 0.0646 | 0.0002 | 1.096 | 0.018 | 0.123  | 0.002  | 761  | 5  | 751  | 9  | 749  | 11 | 0.99 |
| 20 | 0.4  | 0.0531 | 0.0001 | 0.363 | 0.005 | 0.0495 | 0.0006 | 332  | 5  | 314  | 3  | 312  | 4  | 1.00 |
| 21 | 0.25 | 0.0664 | 0.0001 | 1.263 | 0.012 | 0.1379 | 0.0013 | 818  | 3  | 829  | 5  | 834  | 7  | 0.99 |
| 22 | 0.48 | 0.0725 | 0.0003 | 1.591 | 0.017 | 0.1591 | 0.0017 | 1000 | 7  | 966  | 7  | 953  | 9  | 0.94 |
| 23 | 0.46 | 0.1207 | 0.0002 | 5.863 | 0.075 | 0.3525 | 0.0044 | 1966 | 3  | 1956 | 11 | 1948 | 21 | 0.99 |
| 24 | 0.51 | 0.0655 | 0.0003 | 1.17  | 0.012 | 0.1297 | 0.0012 | 789  | 8  | 787  | 6  | 787  | 7  | 0.93 |
| 25 | 0.37 | 0.0651 | 0.0001 | 1.176 | 0.013 | 0.1311 | 0.0015 | 777  | 4  | 789  | 6  | 795  | 8  | 0.99 |
| 26 | 0.71 | 0.0667 | 0.0001 | 1.17  | 0.022 | 0.1273 | 0.0023 | 827  | 4  | 787  | 10 | 773  | 13 | 1.00 |
| 27 | 0.29 | 0.0523 | 0.0002 | 0.348 | 0.005 | 0.0483 | 0.0007 | 300  | 7  | 303  | 4  | 304  | 4  | 0.98 |

|    |      |        |        |       |       |        |        |      |    |      |   |      |    |      |
|----|------|--------|--------|-------|-------|--------|--------|------|----|------|---|------|----|------|
| 28 | 0.41 | 0.0666 | 0.0002 | 1.263 | 0.016 | 0.1375 | 0.0017 | 826  | 5  | 829  | 7 | 831  | 10 | 0.98 |
| 29 | 0.86 | 0.0556 | 0.0002 | 0.523 | 0.006 | 0.0682 | 0.0008 | 438  | 7  | 427  | 4 | 426  | 5  | 0.97 |
| 30 | 0.42 | 0.0553 | 0.0002 | 0.522 | 0.007 | 0.0684 | 0.0009 | 425  | 7  | 426  | 5 | 427  | 6  | 0.98 |
| 31 | 0.83 | 0.0661 | 0.0001 | 1.165 | 0.015 | 0.1278 | 0.0016 | 809  | 4  | 784  | 7 | 776  | 9  | 0.99 |
| 32 | 0.69 | 0.1064 | 0.0001 | 4.667 | 0.044 | 0.3181 | 0.003  | 1739 | 2  | 1761 | 8 | 1782 | 15 | 0.99 |
| 33 | 0.41 | 0.0517 | 0.0003 | 0.33  | 0.005 | 0.0463 | 0.0007 | 272  | 13 | 290  | 4 | 292  | 4  | 0.93 |
| 34 | 0.41 | 0.0532 | 0.0003 | 0.321 | 0.004 | 0.0438 | 0.0005 | 337  | 14 | 283  | 3 | 277  | 3  | 0.87 |
| 35 | 0.26 | 0.0528 | 0.0002 | 0.308 | 0.004 | 0.0423 | 0.0005 | 319  | 8  | 273  | 3 | 267  | 3  | 0.97 |
| 36 | 0.38 | 0.0521 | 0.0003 | 0.329 | 0.005 | 0.0458 | 0.0006 | 289  | 15 | 289  | 4 | 289  | 3  | 0.90 |
| 37 | 0.41 | 0.0551 | 0.0002 | 0.515 | 0.007 | 0.0677 | 0.0009 | 416  | 8  | 421  | 5 | 423  | 5  | 0.97 |
| 38 | 0.27 | 0.0522 | 0.0002 | 0.326 | 0.004 | 0.0453 | 0.0005 | 294  | 9  | 287  | 3 | 286  | 3  | 0.95 |
| 39 | 0.38 | 0.0529 | 0.0002 | 0.317 | 0.003 | 0.0434 | 0.0004 | 326  | 6  | 279  | 3 | 274  | 3  | 0.95 |
| 40 | 0.21 | 0.0665 | 9E-05  | 1.307 | 0.017 | 0.1427 | 0.0018 | 821  | 3  | 849  | 7 | 860  | 10 | 0.99 |
| 41 | 0.53 | 0.0605 | 0.0005 | 0.576 | 0.008 | 0.0691 | 0.0008 | 622  | 18 | 462  | 5 | 431  | 5  | 0.80 |
| 42 | 0.4  | 0.0562 | 0.0001 | 0.528 | 0.006 | 0.0682 | 0.0008 | 460  | 5  | 430  | 4 | 425  | 5  | 0.98 |
| 43 | 0.58 | 0.0679 | 0.0001 | 1.36  | 0.02  | 0.1453 | 0.0021 | 865  | 4  | 872  | 8 | 875  | 12 | 0.99 |
| 44 | 0.93 | 0.0554 | 0.0002 | 0.531 | 0.006 | 0.0696 | 0.0007 | 427  | 8  | 433  | 4 | 434  | 4  | 0.94 |
| 45 | 0.37 | 0.0524 | 0.0003 | 0.33  | 0.004 | 0.0457 | 0.0005 | 301  | 11 | 289  | 3 | 288  | 3  | 0.91 |
| 46 | 0.4  | 0.0583 | 0.0002 | 0.52  | 0.005 | 0.0647 | 0.0005 | 539  | 9  | 425  | 3 | 405  | 3  | 0.91 |
| 47 | 0.31 | 0.0523 | 9E-05  | 0.348 | 0.004 | 0.0482 | 0.0006 | 298  | 4  | 303  | 3 | 304  | 3  | 0.99 |
| 48 | 0.36 | 0.0561 | 0.0001 | 0.565 | 0.006 | 0.073  | 0.0008 | 456  | 5  | 454  | 4 | 455  | 5  | 0.98 |
| 49 | 0.91 | 0.0521 | 0.0002 | 0.305 | 0.004 | 0.0424 | 0.0005 | 288  | 9  | 270  | 3 | 268  | 3  | 0.95 |
| 50 | 0.37 | 0.0525 | 0.0002 | 0.33  | 0.004 | 0.0455 | 0.0005 | 309  | 9  | 289  | 3 | 287  | 3  | 0.94 |
| 51 | 0.38 | 0.0527 | 0.0002 | 0.353 | 0.005 | 0.0485 | 0.0006 | 315  | 7  | 307  | 3 | 306  | 4  | 0.99 |
| 52 | 0.74 | 0.0538 | 0.0002 | 0.383 | 0.005 | 0.0516 | 0.0006 | 363  | 8  | 329  | 4 | 325  | 4  | 0.96 |
| 53 | 1.25 | 0.0557 | 0.0002 | 0.528 | 0.007 | 0.0687 | 0.0009 | 441  | 7  | 430  | 5 | 429  | 5  | 0.97 |
| 54 | 0.37 | 0.0529 | 0.0002 | 0.318 | 0.004 | 0.0436 | 0.0006 | 323  | 6  | 280  | 3 | 275  | 4  | 0.98 |
| 55 | 0.38 | 0.0532 | 0.0001 | 0.351 | 0.004 | 0.0478 | 0.0005 | 338  | 5  | 305  | 3 | 301  | 3  | 0.98 |
| 56 | 0.94 | 0.0557 | 0.0001 | 0.55  | 0.007 | 0.0717 | 0.001  | 439  | 5  | 445  | 5 | 447  | 6  | 0.99 |
| 57 | 0.45 | 0.0676 | 0.0002 | 1.181 | 0.012 | 0.1267 | 0.0012 | 856  | 7  | 791  | 5 | 769  | 7  | 0.95 |
| 58 | 0.72 | 0.0564 | 0.0002 | 0.543 | 0.007 | 0.0698 | 0.0008 | 470  | 9  | 440  | 4 | 435  | 5  | 0.95 |

|    |      |        |        |        |       |        |        |      |    |      |   |      |    |      |
|----|------|--------|--------|--------|-------|--------|--------|------|----|------|---|------|----|------|
| 59 | 0.03 | 0.0656 | 0.0001 | 1.154  | 0.012 | 0.1276 | 0.0013 | 793  | 4  | 779  | 6 | 775  | 7  | 0.98 |
| 60 | 0.25 | 0.0521 | 0.0002 | 0.336  | 0.004 | 0.0468 | 0.0005 | 289  | 9  | 294  | 3 | 295  | 3  | 0.95 |
| 61 | 0.35 | 0.0519 | 0.0001 | 0.346  | 0.004 | 0.0484 | 0.0005 | 281  | 6  | 302  | 3 | 305  | 3  | 0.98 |
| 62 | 0.39 | 0.0574 | 0.0003 | 0.529  | 0.006 | 0.0668 | 0.0007 | 508  | 10 | 431  | 4 | 417  | 4  | 0.92 |
| 63 | 0.4  | 0.0518 | 0.0002 | 0.34   | 0.005 | 0.0476 | 0.0006 | 278  | 6  | 297  | 3 | 300  | 4  | 0.99 |
| 64 | 0.32 | 0.1601 | 0.0001 | 11.018 | 0.065 | 0.4991 | 0.0029 | 2457 | 1  | 2524 | 5 | 2612 | 13 | 0.99 |
| 65 | 0.55 | 0.0911 | 0.0001 | 3.238  | 0.029 | 0.2578 | 0.0023 | 1448 | 2  | 1466 | 7 | 1480 | 12 | 0.99 |
| 66 | 0.98 | 0.0552 | 0.0001 | 0.515  | 0.006 | 0.0677 | 0.0008 | 420  | 6  | 422  | 4 | 423  | 5  | 0.98 |
| 67 | 0.18 | 0.0656 | 8E-05  | 1.215  | 0.016 | 0.1344 | 0.0017 | 792  | 3  | 807  | 7 | 814  | 10 | 1.00 |
| 68 | 0.67 | 0.0674 | 0.0001 | 1.257  | 0.016 | 0.1352 | 0.0018 | 850  | 3  | 826  | 7 | 818  | 10 | 0.99 |
| 69 | 0.43 | 0.0523 | 0.0001 | 0.337  | 0.004 | 0.0467 | 0.0006 | 300  | 4  | 295  | 3 | 294  | 4  | 0.99 |
| 70 | 0.13 | 0.0728 | 0.0002 | 1.622  | 0.017 | 0.1616 | 0.0017 | 1009 | 4  | 979  | 7 | 966  | 9  | 0.98 |
| 71 | 0.25 | 0.0566 | 0.0004 | 0.392  | 0.004 | 0.0502 | 0.0004 | 475  | 16 | 335  | 3 | 316  | 3  | 0.72 |
| 72 | 0.31 | 0.0523 | 0.0002 | 0.326  | 0.004 | 0.0452 | 0.0005 | 299  | 9  | 286  | 3 | 285  | 3  | 0.95 |
| 73 | 0.26 | 0.0552 | 0.0005 | 0.323  | 0.005 | 0.0424 | 0.0005 | 422  | 20 | 284  | 4 | 268  | 3  | 0.82 |
| 74 | 0.34 | 0.0521 | 0.0002 | 0.338  | 0.004 | 0.047  | 0.0005 | 289  | 6  | 295  | 3 | 297  | 3  | 0.97 |
| 75 | 0.74 | 0.0645 | 0.0002 | 1.166  | 0.018 | 0.1311 | 0.002  | 759  | 6  | 785  | 8 | 795  | 11 | 0.98 |
| 76 | 0.29 | 0.0993 | 0.0001 | 4.841  | 0.045 | 0.3536 | 0.0033 | 1611 | 2  | 1792 | 8 | 1953 | 16 | 0.99 |
| 77 | 0.75 | 0.0646 | 0.0001 | 1.163  | 0.015 | 0.1306 | 0.0016 | 761  | 4  | 783  | 7 | 792  | 9  | 0.99 |
| 78 | 0.36 | 0.0519 | 0.0002 | 0.329  | 0.004 | 0.0459 | 0.0006 | 281  | 7  | 288  | 3 | 290  | 3  | 0.97 |
| 79 | 0.38 | 0.0524 | 0.0003 | 0.33   | 0.004 | 0.0457 | 0.0005 | 303  | 14 | 290  | 3 | 288  | 3  | 0.86 |
| 80 | 0.29 | 0.0545 | 0.0003 | 0.35   | 0.004 | 0.0465 | 0.0005 | 393  | 13 | 305  | 3 | 293  | 3  | 0.86 |
| 81 | 0.94 | 0.056  | 0.0002 | 0.535  | 0.005 | 0.0694 | 0.0006 | 451  | 7  | 435  | 3 | 433  | 3  | 0.93 |
| 82 | 0.3  | 0.0517 | 0.0002 | 0.333  | 0.004 | 0.0466 | 0.0005 | 272  | 7  | 291  | 3 | 294  | 3  | 0.97 |
| 83 | 0.37 | 0.0518 | 0.0001 | 0.325  | 0.004 | 0.0456 | 0.0006 | 276  | 6  | 286  | 3 | 288  | 4  | 0.98 |
| 84 | 0.22 | 0.0744 | 0.0001 | 1.872  | 0.021 | 0.1825 | 0.002  | 1052 | 3  | 1071 | 7 | 1081 | 11 | 0.99 |
| 85 | 0.29 | 0.0523 | 0.0001 | 0.338  | 0.004 | 0.0469 | 0.0006 | 299  | 6  | 296  | 3 | 296  | 3  | 0.98 |

---

Yg050413

|   |      |       |        |       |       |        |        |     |   |     |   |     |   |      |
|---|------|-------|--------|-------|-------|--------|--------|-----|---|-----|---|-----|---|------|
| 1 | 0.41 | 0.052 | 0.0002 | 0.315 | 0.003 | 0.0439 | 0.0004 | 284 | 7 | 278 | 3 | 277 | 3 | 0.95 |
|---|------|-------|--------|-------|-------|--------|--------|-----|---|-----|---|-----|---|------|

|    |      |        |        |       |       |        |        |      |    |      |    |      |    |      |
|----|------|--------|--------|-------|-------|--------|--------|------|----|------|----|------|----|------|
| 2  | 0.73 | 0.0669 | 0.0001 | 1.205 | 0.008 | 0.1307 | 0.0009 | 834  | 4  | 803  | 4  | 792  | 5  | 0.96 |
| 3  | 0.43 | 0.0555 | 0.0002 | 0.578 | 0.009 | 0.0755 | 0.0011 | 432  | 6  | 463  | 6  | 470  | 7  | 0.98 |
| 4  | 0.63 | 0.0569 | 8E-05  | 0.619 | 0.006 | 0.0788 | 0.0008 | 489  | 3  | 489  | 4  | 489  | 5  | 0.99 |
| 5  | 0.42 | 0.0522 | 0.0003 | 0.331 | 0.004 | 0.0459 | 0.0004 | 295  | 12 | 290  | 3  | 290  | 3  | 0.92 |
| 6  | 0.5  | 0.0713 | 0.0003 | 1.542 | 0.017 | 0.1567 | 0.0016 | 967  | 7  | 947  | 7  | 939  | 9  | 0.95 |
| 7  | 0.36 | 0.0523 | 0.0001 | 0.336 | 0.004 | 0.0466 | 0.0006 | 297  | 4  | 294  | 3  | 294  | 4  | 0.99 |
| 8  | 0.48 | 0.066  | 0.0001 | 1.234 | 0.013 | 0.1355 | 0.0014 | 807  | 3  | 816  | 6  | 820  | 8  | 0.99 |
| 9  | 0.42 | 0.065  | 0.0002 | 1.122 | 0.014 | 0.1253 | 0.0015 | 773  | 5  | 764  | 6  | 762  | 9  | 0.98 |
| 10 | 0.32 | 0.0548 | 0.0004 | 0.339 | 0.004 | 0.0449 | 0.0004 | 402  | 15 | 296  | 3  | 283  | 3  | 0.83 |
| 11 | 0.33 | 0.0553 | 0.0001 | 0.525 | 0.006 | 0.0688 | 0.0007 | 425  | 4  | 428  | 4  | 430  | 4  | 0.99 |
| 12 | 0.8  | 0.1602 | 0.0002 | 10.32 | 0.13  | 0.4673 | 0.0058 | 2458 | 2  | 2464 | 12 | 2474 | 26 | 1.00 |
| 13 | 0.57 | 0.0571 | 0.0001 | 0.632 | 0.008 | 0.0803 | 0.001  | 495  | 5  | 497  | 5  | 498  | 6  | 0.99 |
| 14 | 0.19 | 0.1176 | 0.0001 | 5.983 | 0.038 | 0.369  | 0.0023 | 1920 | 2  | 1973 | 6  | 2026 | 11 | 0.98 |
| 15 | 0.29 | 0.0562 | 0.0001 | 0.522 | 0.008 | 0.0674 | 0.001  | 459  | 5  | 427  | 5  | 421  | 6  | 0.99 |
| 16 | 0.54 | 0.0667 | 0.0002 | 1.213 | 0.02  | 0.132  | 0.0021 | 828  | 5  | 807  | 9  | 800  | 12 | 0.99 |
| 17 | 0.49 | 0.0555 | 0.0002 | 0.514 | 0.006 | 0.0671 | 0.0007 | 433  | 9  | 421  | 4  | 419  | 4  | 0.94 |
| 18 | 0.81 | 0.0561 | 9E-05  | 0.48  | 0.007 | 0.0621 | 0.0009 | 458  | 3  | 398  | 5  | 389  | 5  | 0.99 |
| 19 | 0.3  | 0.0558 | 0.0002 | 0.523 | 0.005 | 0.0681 | 0.0006 | 443  | 8  | 427  | 3  | 425  | 4  | 0.93 |
| 20 | 1.39 | 0.0675 | 0.0001 | 1.282 | 0.011 | 0.1377 | 0.0012 | 854  | 3  | 837  | 5  | 832  | 7  | 0.98 |
| 21 | 0.54 | 0.0534 | 0.0001 | 0.325 | 0.003 | 0.0441 | 0.0004 | 348  | 5  | 286  | 3  | 278  | 3  | 0.96 |
| 22 | 0.62 | 0.0531 | 0.0002 | 0.344 | 0.004 | 0.047  | 0.0005 | 332  | 7  | 300  | 3  | 297  | 3  | 0.97 |
| 23 | 0.63 | 0.0562 | 0.0001 | 0.564 | 0.006 | 0.0727 | 0.0008 | 460  | 6  | 454  | 4  | 453  | 5  | 0.97 |
| 24 | 0.9  | 0.0554 | 0.0001 | 0.542 | 0.006 | 0.0709 | 0.0008 | 430  | 5  | 440  | 4  | 442  | 5  | 0.98 |
| 25 | 0.9  | 0.0557 | 0.0002 | 0.532 | 0.005 | 0.0693 | 0.0006 | 439  | 8  | 433  | 3  | 432  | 4  | 0.92 |
| 26 | 0.63 | 0.0529 | 0.0002 | 0.39  | 0.004 | 0.0536 | 0.0006 | 324  | 8  | 335  | 3  | 337  | 4  | 0.95 |
| 27 | 0.61 | 0.0554 | 0.0002 | 0.545 | 0.006 | 0.0713 | 0.0007 | 429  | 7  | 441  | 4  | 444  | 5  | 0.96 |
| 28 | 0.46 | 0.1953 | 0.0003 | 12.96 | 0.19  | 0.4813 | 0.007  | 2787 | 2  | 2676 | 14 | 2535 | 30 | 1.00 |
| 29 | 0.32 | 0.0528 | 0.0002 | 0.309 | 0.004 | 0.0424 | 0.0005 | 318  | 9  | 273  | 3  | 268  | 3  | 0.95 |
| 30 | 1.17 | 0.0557 | 0.0001 | 0.519 | 0.006 | 0.0677 | 0.0007 | 438  | 6  | 425  | 4  | 423  | 4  | 0.98 |
| 31 | 0.34 | 0.0527 | 0.0003 | 0.306 | 0.004 | 0.0421 | 0.0004 | 314  | 13 | 271  | 3  | 266  | 3  | 0.93 |
| 32 | 0.53 | 0.0543 | 0.0002 | 0.347 | 0.005 | 0.0464 | 0.0006 | 384  | 8  | 303  | 4  | 293  | 4  | 0.97 |

|    |      |        |        |       |       |        |        |      |    |      |    |      |    |      |
|----|------|--------|--------|-------|-------|--------|--------|------|----|------|----|------|----|------|
| 33 | 1.15 | 0.0655 | 0.0002 | 1.103 | 0.015 | 0.1222 | 0.0017 | 789  | 5  | 755  | 7  | 744  | 10 | 0.99 |
| 34 | 0.2  | 0.0554 | 0.0001 | 0.533 | 0.007 | 0.0698 | 0.0009 | 427  | 5  | 433  | 5  | 435  | 6  | 0.98 |
| 35 | 0.4  | 0.0687 | 0.0002 | 1.324 | 0.015 | 0.1397 | 0.0015 | 891  | 5  | 856  | 6  | 844  | 9  | 0.98 |
| 36 | 0.65 | 0.118  | 0.0002 | 5.267 | 0.06  | 0.3237 | 0.0037 | 1926 | 3  | 1863 | 10 | 1809 | 18 | 0.99 |
| 37 | 0.35 | 0.0552 | 0.0003 | 0.471 | 0.006 | 0.0619 | 0.0007 | 420  | 10 | 392  | 4  | 387  | 4  | 0.94 |
| 38 | 0.18 | 0.0714 | 0.0001 | 1.587 | 0.013 | 0.1612 | 0.0013 | 968  | 3  | 965  | 5  | 964  | 7  | 0.99 |
| 39 | 0.37 | 0.0544 | 0.0002 | 0.469 | 0.006 | 0.0626 | 0.0008 | 386  | 6  | 391  | 4  | 392  | 5  | 0.98 |
| 40 | 0.41 | 0.0553 | 0.0002 | 0.53  | 0.007 | 0.0695 | 0.0009 | 425  | 7  | 432  | 5  | 434  | 6  | 0.98 |
| 41 | 0.37 | 0.1361 | 0.0003 | 5.43  | 0.12  | 0.2895 | 0.0061 | 2179 | 4  | 1890 | 18 | 1640 | 30 | 0.99 |
| 42 | 0.53 | 0.0554 | 0.0002 | 0.497 | 0.006 | 0.0651 | 0.0008 | 428  | 6  | 410  | 4  | 407  | 5  | 0.98 |
| 43 | 0.43 | 0.0524 | 0.0004 | 0.281 | 0.004 | 0.039  | 0.0005 | 301  | 18 | 252  | 3  | 247  | 3  | 0.83 |
| 44 | 1    | 0.0624 | 0.0004 | 0.93  | 0.015 | 0.1081 | 0.0016 | 688  | 15 | 667  | 8  | 662  | 9  | 0.90 |
| 45 | 0.53 | 0.0543 | 0.0006 | 0.448 | 0.008 | 0.0599 | 0.0009 | 384  | 23 | 376  | 6  | 375  | 6  | 0.82 |
| 46 | 0.4  | 0.0554 | 0.0002 | 0.462 | 0.006 | 0.0605 | 0.0008 | 429  | 6  | 386  | 4  | 379  | 5  | 0.98 |
| 47 | 0.43 | 0.0533 | 0.0003 | 0.323 | 0.005 | 0.0439 | 0.0006 | 343  | 13 | 284  | 4  | 277  | 4  | 0.93 |
| 48 | 0.44 | 0.0551 | 0.0002 | 0.507 | 0.004 | 0.0667 | 0.0005 | 417  | 8  | 416  | 3  | 417  | 3  | 0.90 |
| 49 | 0.69 | 0.0544 | 0.0002 | 0.492 | 0.007 | 0.0656 | 0.0009 | 388  | 9  | 406  | 5  | 410  | 5  | 0.96 |
| 50 | 0.5  | 0.0549 | 0.0001 | 0.484 | 0.007 | 0.0639 | 0.0009 | 409  | 5  | 401  | 5  | 400  | 5  | 0.99 |
| 51 | 0.94 | 0.111  | 0.0002 | 5.194 | 0.07  | 0.3393 | 0.0045 | 1816 | 3  | 1851 | 11 | 1885 | 22 | 0.99 |
| 52 | 0.43 | 0.0521 | 0.0002 | 0.317 | 0.004 | 0.0441 | 0.0006 | 291  | 7  | 279  | 3  | 278  | 3  | 0.98 |
| 53 | 0.5  | 0.0715 | 9E-05  | 1.71  | 0.022 | 0.1734 | 0.0022 | 972  | 3  | 1012 | 8  | 1032 | 12 | 1.00 |
| 54 | 0.61 | 0.0543 | 0.0003 | 0.411 | 0.006 | 0.055  | 0.0008 | 383  | 11 | 350  | 4  | 345  | 5  | 0.95 |
| 55 | 0.79 | 0.0984 | 0.0001 | 4.03  | 0.045 | 0.2972 | 0.0033 | 1593 | 2  | 1640 | 9  | 1679 | 16 | 0.99 |
| 56 | 0.25 | 0.0525 | 0.0001 | 0.327 | 0.005 | 0.0451 | 0.0006 | 308  | 6  | 287  | 4  | 285  | 4  | 0.99 |
| 57 | 0.36 | 0.0556 | 0.0002 | 0.359 | 0.005 | 0.0469 | 0.0007 | 437  | 8  | 312  | 4  | 295  | 4  | 0.97 |
| 58 | 0.3  | 0.0552 | 7E-05  | 0.509 | 0.008 | 0.0669 | 0.001  | 421  | 3  | 418  | 5  | 418  | 6  | 1.00 |
| 59 | 0.65 | 0.0655 | 0.0001 | 1.206 | 0.017 | 0.1335 | 0.0019 | 790  | 4  | 803  | 8  | 808  | 11 | 0.99 |
| 60 | 0.16 | 0.0563 | 0.0002 | 0.566 | 0.011 | 0.0729 | 0.0014 | 464  | 6  | 455  | 7  | 454  | 9  | 0.99 |
| 61 | 0.39 | 0.052  | 0.0003 | 0.326 | 0.005 | 0.0454 | 0.0006 | 285  | 12 | 286  | 3  | 287  | 4  | 0.94 |
| 62 | 1.19 | 0.065  | 0.0001 | 1.12  | 0.016 | 0.125  | 0.0018 | 773  | 5  | 763  | 8  | 760  | 10 | 0.99 |
| 63 | 0.3  | 0.0519 | 0.0002 | 0.326 | 0.005 | 0.0455 | 0.0006 | 282  | 8  | 286  | 4  | 287  | 4  | 0.98 |

|    |      |        |        |       |       |        |        |      |    |      |    |      |    |      |
|----|------|--------|--------|-------|-------|--------|--------|------|----|------|----|------|----|------|
| 64 | 0.29 | 0.0522 | 0.0002 | 0.337 | 0.005 | 0.0468 | 0.0007 | 293  | 10 | 295  | 4  | 295  | 4  | 0.95 |
| 65 | 0.31 | 0.0525 | 0.0003 | 0.334 | 0.005 | 0.0462 | 0.0006 | 306  | 11 | 293  | 4  | 291  | 4  | 0.95 |
| 66 | 0.37 | 0.0524 | 0.0001 | 0.344 | 0.005 | 0.0476 | 0.0007 | 304  | 5  | 300  | 4  | 300  | 4  | 0.99 |
| 67 | 0.46 | 0.0554 | 0.0002 | 0.531 | 0.008 | 0.0696 | 0.0011 | 428  | 6  | 433  | 5  | 434  | 6  | 0.99 |
| 68 | 0.29 | 0.0521 | 0.0002 | 0.327 | 0.005 | 0.0455 | 0.0006 | 291  | 8  | 287  | 4  | 287  | 4  | 0.98 |
| 69 | 0.3  | 0.0697 | 0.0001 | 1.552 | 0.022 | 0.1615 | 0.0023 | 919  | 4  | 951  | 9  | 966  | 13 | 0.99 |
| 70 | 0.66 | 0.0647 | 0.0002 | 1.125 | 0.023 | 0.1262 | 0.0025 | 763  | 5  | 765  | 11 | 767  | 14 | 0.99 |
| 71 | 0.35 | 0.0521 | 0.0002 | 0.357 | 0.005 | 0.0497 | 0.0007 | 291  | 7  | 310  | 4  | 313  | 4  | 0.98 |
| 72 | 0.48 | 0.0659 | 0.0001 | 1.226 | 0.012 | 0.1349 | 0.0014 | 804  | 3  | 812  | 6  | 816  | 8  | 0.99 |
| 73 | 0.42 | 0.1131 | 0.0002 | 5.268 | 0.065 | 0.3379 | 0.0041 | 1849 | 2  | 1863 | 10 | 1878 | 20 | 0.99 |
| 74 | 0.3  | 0.0521 | 0.0002 | 0.332 | 0.005 | 0.0462 | 0.0007 | 288  | 7  | 291  | 4  | 292  | 4  | 0.98 |
| 75 | 1.1  | 0.0645 | 0.0002 | 1.076 | 0.015 | 0.1209 | 0.0017 | 759  | 7  | 741  | 8  | 736  | 10 | 0.97 |
| 76 | 0.8  | 0.072  | 0.0002 | 1.582 | 0.022 | 0.1593 | 0.0022 | 986  | 5  | 963  | 9  | 954  | 12 | 0.98 |
| 77 | 0.49 | 0.0524 | 0.0001 | 0.314 | 0.004 | 0.0435 | 0.0006 | 303  | 5  | 277  | 3  | 274  | 4  | 0.99 |
| 78 | 0.34 | 0.0661 | 9E-05  | 1.285 | 0.017 | 0.141  | 0.0018 | 809  | 3  | 839  | 7  | 851  | 10 | 1.00 |
| 79 | 0.34 | 0.0552 | 0.0002 | 0.53  | 0.008 | 0.0695 | 0.001  | 422  | 6  | 431  | 5  | 434  | 6  | 0.98 |
| 80 | 0.26 | 0.0522 | 0.0001 | 0.339 | 0.005 | 0.0471 | 0.0007 | 294  | 6  | 296  | 4  | 297  | 4  | 0.98 |
| 81 | 0.3  | 0.0522 | 0.0001 | 0.361 | 0.005 | 0.0501 | 0.0007 | 294  | 5  | 313  | 4  | 315  | 4  | 0.99 |
| 82 | 0.41 | 0.0527 | 0.0001 | 0.374 | 0.005 | 0.0515 | 0.0007 | 316  | 6  | 322  | 4  | 324  | 4  | 0.98 |
| 83 | 0.32 | 0.0526 | 0.0002 | 0.346 | 0.005 | 0.0477 | 0.0007 | 313  | 7  | 302  | 4  | 301  | 4  | 0.98 |
| 84 | 0.43 | 0.0801 | 0.0001 | 2.465 | 0.031 | 0.2232 | 0.0028 | 1199 | 3  | 1262 | 9  | 1300 | 15 | 0.99 |
| 85 | 0.32 | 0.0553 | 0.0001 | 0.513 | 0.007 | 0.0673 | 0.0009 | 423  | 4  | 420  | 5  | 420  | 6  | 0.99 |

Zou et al. (2013)

| Sample | Method | wt(mg) | Pb(ug) | Th/U | <sup>206</sup> Pb/ <sup>204</sup> Pb | <sup>207</sup> Pb/ <sup>206</sup> Pb | ±2σ    | <sup>207</sup> Pb/ <sup>235</sup> U | ±2σ    | <sup>206</sup> Pb/ <sup>238</sup> U | ±2σ   | ρ    | <sup>207</sup> Pb/ <sup>235</sup> U | ±2σ   | <sup>206</sup> Pb/ <sup>238</sup> U | ±2σ |
|--------|--------|--------|--------|------|--------------------------------------|--------------------------------------|--------|-------------------------------------|--------|-------------------------------------|-------|------|-------------------------------------|-------|-------------------------------------|-----|
| WQ09-2 | CA     | 1.1    | 1.1    | 0.6  | 408                                  | 0.0528                               | 1.79%  | 0.3314                              | 1.88%  | 0.0455                              | 0.19% | 0.51 | 290.6                               | 5.5   | 287                                 | 0.6 |
| WQ09-2 | CA     | 1.2    | 1.1    | 0.7  | 164                                  | 0.0501                               | 5.05%  | 0.3125                              | 5.27%  | 0.0453                              | 0.41% | 0.55 | 276.1                               | 14.5  | 285.3                               | 1.2 |
| WQ09-2 | CA     | 1.3    | 1.2    | 0.5  | 845                                  | 0.0524                               | 1.22%  | 0.3285                              | 1.29%  | 0.0455                              | 0.16% | 0.5  | 288.4                               | 3.7   | 286.8                               | 0.4 |
| WQ09-2 | CA     | 1.3    | 1.2    | 0.6  | 271                                  | 0.0512                               | 3.19%  | 0.3222                              | 3.35%  | 0.0456                              | 0.28% | 0.6  | 283.6                               | 9.5   | 287.6                               | 0.8 |
| WQ09-2 | CA     | 0.5    | 1.2    | 0.8  | 83                                   | 0.0498                               | 11.31% | 0.3089                              | 11.85% | 0.045                               | 0.87% | 0.64 | 273.3                               | 32.4  | 283.9                               | 2.5 |
| WQ09-2 | CA     | 0.9    | 1.3    | 0.6  | 144                                  | 0.0551                               | 5.66%  | 0.3453                              | 5.96%  | 0.0454                              | 0.56% | 0.56 | 301.2                               | 17.9  | 286.4                               | 1.6 |
| WQ09-2 | CA     | 1.8    | 2.7    | 0.6  | 118                                  | 0.0522                               | 6.39%  | 0.328                               | 6.66%  | 0.0456                              | 0.68% | 0.44 | 288.1                               | 19.2  | 287.3                               | 2   |
| WQ09-2 | CA     | 0.3    | 1.5    | 0.7  | 56                                   | 0.0423                               | 43.86% | 0.2619                              | 45.89% | 0.0449                              | 2.47% | 0.83 | 236.2                               | 108.4 | 283.4                               | 7   |
| WQ09-2 | CA     | 1.2    | 3.2    | 0.5  | 143                                  | 0.052                                | 4.85%  | 0.3257                              | 5.07%  | 0.0454                              | 0.48% | 0.5  | 286.3                               | 14.5  | 286.2                               | 1.4 |
| WQ09-2 | CA     | 0.6    | 1.3    | 0.6  | 79                                   | 0.0539                               | 11.20% | 0.3388                              | 11.79% | 0.0456                              | 1.16% | 0.54 | 296.3                               | 34.9  | 287.6                               | 3.3 |
| WQ09-2 | CA     | 0.3    | 1.4    | 0.6  | 71                                   | 0.0456                               | 15.28% | 0.2837                              | 15.94% | 0.0452                              | 1.05% | 0.65 | 253.6                               | 40.4  | 284.7                               | 3   |
| WQ09-2 | CA     | 0.4    | 2.3    | 0.7  | 72                                   | 0.0559                               | 16.57% | 0.3471                              | 17.37% | 0.0451                              | 1.42% | 0.59 | 302.5                               | 52.5  | 284.1                               | 4   |

[Liu et al. \(2014\)](#)

## Reference

- Li, H.Y., Huang, X.L., Li, W.X., Cao, J., He, P.L. & Xu, Y.G. 2013. Age and geochemistry of the Early Permian basalts from Qimugan in the southwestern Tarim basin. *Acta Petrological Sinica*, 29(10), 3353-3368. (in Chinese with English abstract).
- Li, Y., Su, W., Kong, P., Qian, Y.X., Zhang, K.L., Zhang, M.L., Chen, Y., Cai, X.Y. & You, D.H. 2007. Zircon U–Pb ages of the Early Permian magmatic rocks in the Tazhong–Bachu region, Tarim Basin by LA-ICP-MS. *Acta Petrologica Sinica*, 23 (5), 1097–1107. (in Chinese with English abstract)
- Li, Z.L., Chen, H.L., Song, B., Li, Y.Q., Yang, S.F. & Yu, X. 2011. Temporal evolution of the Permian large igneous province in Tarim Basin, Northwest China. *Journal of Asian Earth Sciences*, 42, 917–927.



- Liu, H.Q., Xu, Y.G., Tian, W., Zhong, Y.T., Mundil, R., Li, X.H. & Shanguan, S. M. 2014. Origin of two types of rhyolites in the Tarim Large Igneous Province: Consequences of incubation and melting of a mantle plume. *Lithos*, in press.
- Sun, L.H., Wang, Y.J., Fan, W.M. & Zi, J.W. 2008. A further discussion of the petrogenesis and tectonic implication of the Mazhashan syenites in the Bachu area. *Journal of Jilin University (Earth Science Edition)*, 38(1), 8-20. (in Chinese with English abstract)
- Sun, Y., Xiao, Y.F., Zhao, X.K., Qian, Y.X., Xiao, G.W. & Liu, H.Q. 2009. The zircon U-Pb age of Mazha'erTage alkalic complex in the Tarim Basin and its geologic significance. *Acta Geologica Sinica*, 83(6), 775-781. (in Chinese with English abstract)
- Tian, W., Campbell, I.H., Allen, C., Guan, P., Pan, W., Chen, M.M., Yu, H. & Zhu, W. P. 2010. The Tarim picrate-basalt-rhyolite suite, a Permian flood basalt from northwest China with contrasting rhyolites produced by fractional crystallization and anatexis. *Contributions to Mineralogy and Petrology*, 160 (3), 407-425.
- Wei, X. & Xu, Y.G. 2011. Petrogenesis of Xiaohaizi syenite complex from Bachu area, Tarim. *Acta Petrologica Sinica*, 27(10), 2984- 3004. (in Chinese with English abstract)
- Wei, X. & Xu, Y.G. 2013. Petrogenesis of the mafic dykes from Bachu and implications for the magma evolution of the Tarim large igneous province, NW China. *Acta Petrologica Sinica*, 29(10), 3323- 3335. (in Chinese with English abstract)
- Yang, S.F., Li, Z.L., Chen, H.L., Xiao, W.J., Yu, X., Lin, X.B. & Shi, X.G. 2006b. Discovery of a Permian quartz syenitic porphyritic dyke from the Tarim Basin and its tectonic implications. *Acta Petrologica Sinica*, 22(5), 1405–1412. (in Chinese with English abstract)
- Yu, X. 2009. Magma evolution and seep geological processes of Early Permian Tarim Large Igneous Province. Ph.D. Dissertation. Hangzhou: Zhejiang University, 1-136. (in Chinese with English summary)
- Yu, X., Yang, S.F., Chen, H.L., Chen, Z.Q., Li, Z.L., Batt, G.E. & Li, Y.Q. 2011a. Permian flood basalts from the Tarim Basin, Northwest China: SHRIMP zircon U-Pb dating and geochemical characteristics. *Gondwana Research*, 20(2-3), 485-497.
- Yu, J.C., Mo, X.X., Dong, G.C., Yu, X.H., Xing, F.C., Li, Y. & Huang, X.K. 2011b. Felsic volcanic rocks from northern Tarim, NW China: Zircon U-Pb dating and geochemical characteristics. *Acta Petrologica Sinica*, 27(7), 2184-2194. (in Chinese with English abstract)
- Zhang, C.L., Li, X.H., Li, Z.X., Ye, H.M. & Li, C.N. 2008. A Permian layered intrusive complex in the Western Tarim Block, northwestern China: product of a Ca. 275–Ma mantle plume? *Journal of Geology*, 116(3), 269–287.

- Zhang, H.A., Li, Y.J., Wu, G.Y., Su, W., Qian, Y.X., Meng, Q.L., Cai, X.Y., Han, L.J., Zhao, Y. & Liu, Y.L. 2009. Isotopic geochronology of Permian igneous rocks in the Tarim Basin. *Chinese Journal of Geology*, 44 (1), 137–158. (in Chinese with English abstract).
- Zhang, C.L., Xu, Y.G., Li, Z.X., Wang, H.Y. & Ye, H.M. 2010. Diverse Permian magmatism in the Tarim Block, NW China: Genetically linked to the Permian Tarim mantle plume? *Lithos*, 119 (3-4): 537-552.
- Zhang, D.Y., Zhou, T.F., Yuan, F., Jowitt, S.M., Fan, Y. & Liu, S. 2012. Source, evolution and emplacement of Permian Tarim Basalts: evidence from U–Pb dating, Sr–Nd–Pb–Hf isotope systematics and whole rock geochemistry of basalts from the Keping area, Xinjiang Uygur Autonomous region, northwest China. *Journal of Asian Earth Sciences*, 49, 175–190.
- Zhang, D.Y., Zhang, Z.C., Santosh, M., Cheng, Z., He, H. & Kang, J. 2013. Perovskite and baddeleyite from kimberlitic intrusions in the Tarim large igneous province signal the onset of an end-Carboniferous mantle plume. *Earth and Planetary Science Letters*, 361, 238–248.
- Zhang, C.L. & Zou, H.B. 2013. Permian A-type granites in Tarim and western part of Central Asian Orogenic Belt (CAOB): Genetically related to a common Permian mantle plume? *Lithos*, 172, 47-60.
- Zou, S.Y., Li, Z.L., Ren, Z.Y., Li, Y.Q., Yang S.F., Chen, H.L., Song, B. & Yu, X. 2013. U-Pb dating and Hf isotopic compositions of the detrital zircons from Permian sedimentary rocks in Keping area of Tarim Basin, Xianjiang, China: Constraints on geological evolution of Tarim Block. *Acta Petrologica Sinica*, 29(10), 3369-3388. (in Chinese with English abstract).
