# Supplementary material
Source: publisher figshare collection journal article supplement (https://geolsoc.figshare.com/articles/dataset/_/3454061)
Supplement: Supplementary file 2 [file 1]

| Sections    | Ages(Ma)            | Stratum(Formation) | Lithology               | Methods                                         | Source                     | Secondary source <sup>a</sup>                            | Standard | Procedure | Raw data | Recalculation <sup>d</sup> | MSWD | Comment <sup>e</sup> |
|-------------|---------------------|--------------------|-------------------------|-------------------------------------------------|----------------------------|----------------------------------------------------------|----------|-----------|----------|----------------------------|------|----------------------|
| Nanka 1     | 247.5±0.3           | 5213 m             | Dacite                  | K-Ar                                            | Nanka 1 drill well report* | Chen <i>et al.</i> 1998                                  | N        | N         | N        | UE                         |      | 4                    |
| Shengli 1   | 259.63              | 5003 m             | Andesite                | K-Ar                                            | Yao <i>et al.</i> 1991*    | Chen <i>et al.</i> 1998                                  | N        | N         | N        | UE                         |      | 4                    |
| Shengli 1   | 259.64              | 5667 m             | Andesite                | K-Ar                                            | Yao <i>et al.</i> 1991*    | Chen <i>et al.</i> 1998                                  | N        | N         | N        | UE                         |      | 4                    |
| Keping      | 292.4±0.5           | Kupukuziman        | Basalt                  | K-Ar                                            | Liu & Li 1991*             | Chen <i>et al.</i> 1997a; Yang <i>et al.</i> 2006a,2007  | N        | N         | N        | UE                         |      | 4                    |
| Keping      | 259.8±0.9           | Kaipaizileike      | Basalt                  | K-Ar                                            | Liu & Li 1991*             | Chen <i>et al.</i> 1997a; Yang <i>et al.</i> , 2006,2007 | N        | N         | N        | UE                         |      | 4                    |
| Keping      | 259.8±0.9           | Unknown            | Basalt                  | K-Ar                                            | Liu & Li 1991*             | Yang <i>et al.</i> 2006a, 2007                           | N        | N         | N        | UE                         |      | 4                    |
| Keping      | 278                 | Kupukuziman        | Basalt                  | K-Ar                                            | Jia <i>et al.</i> 1992*    | Yang <i>et al.</i> 2006a                                 | N        | N         | N        | UE                         |      | 4                    |
| Kuche River | 285.7±17            | Xiaotiekanlike     | Granite                 | Rb-Sr                                           | Lu <i>et al.</i> 1994*     | Chen <i>et al.</i> 1998                                  | N        | N         | N        | UE                         |      | 4                    |
| Bachu       | 259±57              | Dyke               | Diabase                 | Sm-Nd                                           | Jia <i>et al.</i> 1995*    | Yang <i>et al.</i> , 2005                                | N        | N         | N        | UE                         |      | 4                    |
| Keping      | 292.0±0.5           | Unknown            | Basalt                  | K-Ar                                            | Jia <i>et al.</i> 1995*    | Chen <i>et al.</i> 1997a                                 | N        | N         | N        | UE                         |      | 4                    |
| Bachu       | 259                 | Dyke               | Diabase                 | Sm-Nd                                           | Jia <i>et al.</i> 1995*    | Chen <i>et al.</i> 1997a                                 | N        | N         | N        | UE                         |      | 4                    |
| Kuche River | 278±23              | Xiaotiekanlike     | Rhyolite                | <sup>40</sup> Ar- <sup>39</sup> Ar <sup>b</sup> | Yang <i>et al.</i> 1996    |                                                          | N        | N         | N        | UE                         |      | 4                    |
| Xiaohaizi   | 277.7±1.3           | Syenite body       | Syenite body            | <sup>40</sup> Ar- <sup>39</sup> Ar              | Yang <i>et al.</i> 1996    |                                                          | N        | N         | Y        | valid plateau              |      | 4                    |
| Keping      | 278.5±1.4           | Kupukuziman        | Basalt                  | <sup>40</sup> Ar- <sup>39</sup> Ar              | Yang <i>et al.</i> 1996    | Yang <i>et al.</i> 2006a, 2007                           | N        | N         | N        | UE                         |      | 4                    |
| Yingmai 9   | 287.6±2.8           | Unknown            | Alkali granite          | K-Ar                                            | Yang <i>et al.</i> 1996    |                                                          | N        | N         | N        | UE                         |      | 4                    |
| Keping      | 278.5±1.4           | Unknown            | Basalt                  | WR(?) <sup>40</sup> Ar- <sup>39</sup> Ar        | Chen <i>et al.</i> 1997a   |                                                          | N        | N         | N        | UE                         |      | 4                    |
| Keping      | 276.5±1.3-282.3±1.4 | Kaipaizileike      | Basalt                  | <sup>40</sup> Ar- <sup>39</sup> Ar              | Chen <i>et al.</i> 1997b   |                                                          | N        | N         | Y        | no plateau                 |      | 2, no clear position |
| Kuche River | 278.0±1.3           | Xiaotiekanlike     | Rhyolite                | WR(?) <sup>40</sup> Ar- <sup>39</sup> Ar        | Chen <i>et al.</i> 1998    |                                                          | N        | N         | N        | UE                         |      | 4                    |
| Yingmai 9   | 287.6±2.8           | 5421 m             | Syenite                 | K-Ar                                            | Chen <i>et al.</i> 1998    |                                                          | N        | N         | N        | UE                         |      | 4                    |
| Wajilitag   | 357.9-306           | Intrusive complex  | ?                       | WR Rb-Sr & Zircon U-Pb                          | Li <i>et al.</i> 2001      |                                                          | N        | N         | N        | UE                         |      | 4                    |
| Wajilitag   | 252.7               | Breccia pipe       | Mica-olivine pyroxenite | phlogopite <sup>40</sup> Ar- <sup>39</sup> Ar   | Li <i>et al.</i> 2001      |                                                          | N        | N         | N        | UE                         |      | 4                    |
| Wajilitag   | 231.3               | Dyke               | Alkalic dike            | WR K-Ar                                         | Li <i>et al.</i> 2001      |                                                          | N        | N         | N        | UE                         |      | 4                    |
| Keping      | 272.9±4.0           | Kupukuziman        | Basalt                  | K-Ar                                            | Zhang <i>et al.</i> 2003   | Yang <i>et al.</i> 2006a                                 | N        | N         | N        | UE                         |      | 4                    |
| Keping      | 288.4±4.4           | Kupukuziman        | Basalt                  | K-Ar                                            | Zhang <i>et al.</i> 2003   | Yang <i>et al.</i> 2006a                                 | N        | N         | N        | UE                         |      | 4                    |
| Keping      | 289.0±6.1           | Kupukuziman        | Basalt                  | K-Ar                                            | Zhang <i>et al.</i> 2003   | Yang <i>et al.</i> 2006a                                 | N        | N         | N        | UE                         |      | 4                    |
| Keping      | 248.3±3.8           | KP                 | Basalt                  | K-Ar                                            | Zhang <i>et al.</i> 2003   | Yang <i>et al.</i> 2006a                                 | N        | N         | N        | UE                         |      | 4                    |
| Tahe        | 245±1-276±3         | Unknown            | Dacite                  | LA-ICP-MS <sup>c</sup>                          | Luo <i>et al.</i> 2003*    | Luo <i>et al.</i> 2006                                   | N        | N         | N        | UE                         |      | 4                    |

|            |            |                                       |                       |                                       |                          |                  |        |   |   |                   |      |                      |
|------------|------------|---------------------------------------|-----------------------|---------------------------------------|--------------------------|------------------|--------|---|---|-------------------|------|----------------------|
| Keping     | 287.2±5.6  | Kaipaizileike                         | Basalt                | K-Ar                                  | Yang <i>et al.</i> 2006a | Unpublished data | N      | N | N | UE                |      | 4                    |
| Taxinan    | 289.6±5.6  | Qipan                                 | Basalt                | K-Ar                                  | Yang <i>et al.</i> 2006a | Unpublished data | N      | N | N | UE                |      | 4                    |
| Keping     | 281.8±4.2  | Kupukuziman(3/4 basalt)               | Basalt                | WR <sup>40</sup> Ar- <sup>39</sup> Ar | Yang <i>et al.</i> 2006a |                  | ZBH-25 | Y | Y | no plateau        |      | 4                    |
| Taxinan    | 290.1±3.5  | Qipan (inter layer of damusi section) | Basalt                | WR <sup>40</sup> Ar- <sup>39</sup> Ar | Yang <i>et al.</i> 2006a |                  | ZBH-25 | Y | Y | no plateau        |      | 4                    |
| Xiaohaizi  | 277±4      | Syenite body                          | Syenite body          | SHRIMP                                | Yang <i>et al.</i> 2006b |                  | N      | N | Y | 272.3 ± 7.3       | 4.0  | incomplete data      |
| Wajilitag  | 350        | Intrusive complex                     | Alkaline gabbro       | U-Pb                                  | Liu <i>et al.</i> 2004   |                  | N      | N | N | UE                |      | 4                    |
| Wajilitag  | 231.3      | Intrusive complex                     | Lamprophyre           | K-Ar                                  | Liu <i>et al.</i> 2004   |                  | N      | N | N | UE                |      | 4                    |
| Wajilitag  | 252.7      | Intrusive complex                     | Kimberlite hornblende | <sup>40</sup> Ar- <sup>39</sup> Ar    | Liu <i>et al.</i> 2004   |                  | N      | N | N | UE                |      | 4                    |
| Xiaohaizi  | 310.1      | Syenite body                          | syenite               | K-Ar                                  | Liu <i>et al.</i> 2004   |                  | N      | N | N | UE                |      | 4                    |
| Keping     | 275±13     | Unknown                               | Basalt                | LA-ICP-MS                             | Li <i>et al.</i> 2007    | NIST610, 91500*  |        | Y | Y | Basalt zircon     |      | 4                    |
| Keping     | 291±10     | Unknown                               | Tuff                  | LA-ICP-MS                             | Li <i>et al.</i> 2007    | NIST610, 91500*  |        | Y | Y | 291.5 ± 9.9       | 11.4 | 2, scattered         |
| Yijianfang | 274±15     | Dyke                                  | Gabbro                | LA-ICP-MS                             | Li <i>et al.</i> 2007    | NIST610, 91500*  |        | Y | Y | 5 scattered spots | 10.1 | 3                    |
| Xiaohaizi  | 272±6      | Dyke                                  | Diabase               | LA-ICP-MS                             | Li <i>et al.</i> 2007    | NIST610, 91500*  |        | Y | Y | 271.8 ± 5.8       | 12   | 3                    |
| Xiaohaizi  | 282±3      | Syenite body                          | Syenite body          | LA-ICP-MS                             | Li <i>et al.</i> 2007    | NIST610, 91500*  |        | Y | Y | 282.4 ± 2.7       | 2.8  | 1                    |
| Xiaohaizi  | 281±4      | Syenite body                          | Syenite body          | LA-ICP-MS                             | Li <i>et al.</i> 2007    | NIST610, 91500*  |        | Y | Y | 280.4 ± 4.7       | 7.2  | 2, big span          |
| Shun 1     | 286±4      | 3461-3465 m                           | Dacite-porphry        | LA-ICP-MS                             | Li <i>et al.</i> 2007    | NIST610, 91500*  |        | Y | Y | 287.6 ± 4.5       | 11.3 | 2, big span          |
| Taxinan    | 289.6±5.6  | Qipan                                 | Basalt                | WR K-Ar                               | Li <i>et al.</i> 2008    |                  | N      | N | N | UE                |      | 4                    |
| Xiaohaizi  | 273.7±1.5  | Syenite body                          | Syenite body          | LA-ICP-MS                             | Zhang <i>et al.</i> 2008 | TEMORA417        |        | Y | Y | All negative RHO  |      | 4                    |
| Xiaohaizi  | 285.9±2.6  | Syenite body                          | Syenite body          | SHRIMP                                | Sun <i>et al.</i> 2008   | TEMORA417        |        | Y | Y | 285.2 ± 3.6       | 1.4  | 1                    |
| Keping     | 287±20     | Unknown                               | Basalt                | LA-ICP-MS                             | Zhang <i>et al.</i> 2009 |                  | N      | Y | Y | Basalt zircon     |      | 4                    |
| Keping     | 294±21     | Unknown                               | Basalt                | LA-ICP-MS                             | Zhang <i>et al.</i> 2009 |                  | N      | Y | Y | Basalt zircon     |      | 4                    |
| Yijianfang | 283±1.3    | Dyke                                  | Diabase               | LA-ICP-MS                             | Zhang <i>et al.</i> 2009 |                  | N      | Y | Y | 5 scattered spots | 10.1 | 3                    |
| Xiaohaizi  | 283.1±3.2  | Dyke                                  | Gabbro                | LA-ICP-MS                             | Zhang <i>et al.</i> 2009 |                  | N      | Y | Y | 282.4 ± 2.8       | 3.2  | 2, big span          |
| Bachu      | 281.7±4.8  | Syenite body                          | Syenite body          | LA-ICP-MS                             | Zhang <i>et al.</i> 2009 |                  | N      | Y | Y | 281.4 ± 4.6       | 7.5  | 2, big span          |
| Wajilitag  | 265±16     | Intrusive complex                     | Gabbro                | LA-ICP-MS                             | Zhang <i>et al.</i> 2009 |                  | N      | Y | Y | 268 ± 14          | 21   | 3                    |
| Shun 1     | 285±11     | 3461.1-3463.2 m                       | Dacite-porphry        | LA-ICP-MS                             | Zhang <i>et al.</i> 2009 |                  | N      | Y | Y | 285±11            | 8.7  | 2, big span          |
| Wajilitag  | 295.9±2.1  | Intrusive complex                     | Granodiorite          | LA-ICP-MS                             | Zhang <i>et al.</i> 2009 |                  | N      | Y | Y | 295.8 ± 1.8       | 2.1  | 2, no clear position |
| Fang 1     | 264.5±16.6 | 4749.01 m                             | Diabase               | WR <sup>40</sup> Ar- <sup>39</sup> Ar | Zhang <i>et al.</i> 2009 |                  | N      | Y | Y | no plateau        |      | 4                    |
| Zhong 1    | 205±4.3    | 50 <sup>40</sup> m                    | Basalt                | WR <sup>40</sup> Ar- <sup>39</sup> Ar | Zhang <i>et al.</i> 2009 |                  | N      | Y | N | UE                |      | 4                    |

|               |                     |                                                 |                             |                                                |                              |                   |                 |                |                  |             |                               |
|---------------|---------------------|-------------------------------------------------|-----------------------------|------------------------------------------------|------------------------------|-------------------|-----------------|----------------|------------------|-------------|-------------------------------|
| Xiaohaizi     | 283.3±1.8           | Syenite body                                    | Pyroxene syenite            | LA-ICP-MS                                      | Sun <i>et al.</i> 2009       | NIST612           | Y               | Y              | 283.3±1.8        | 0.34        | 1                             |
| Xiaohaizi     | 281.2±3.7           | Dyke<br>Quartz syenitic<br>porphyry             | granite vein                | LA-ICP-MS                                      | Sun <i>et al.</i> 2009       | NIST612           | Y               | Y              | 282.0 ± 3.7      | 1.8         | 1                             |
| Xiaohaizi     | 278.4 ±2.2          |                                                 | Quartz syenitic<br>porphyry | porphyry                                       | SHRIMP                       | Yu 2009           | TEMORA,<br>M257 | Y              | Y                | 279.2 ± 2.5 | 2.0                           |
| Nanka 1       | 277.3±2.5           | 5207 m                                          | Rhyolite                    | SHRIMP                                         | Tian <i>et al.</i> 2010      | Temora 2,<br>R33  | Y               | Y              | 277.3±2.5        | 1.5         | 1                             |
| Mana 1        | 271.7±2.2           | 5166 m                                          | Rhyolite                    | LA-ICP-MS                                      | Tian <i>et al.</i> 2010      | Temora 2,<br>R33  | Y               | Y              | 271.7±2.2        | 3.7         | 1                             |
| Yingmai 16    | 282.9±2.5           | 5195 m                                          | Rhyolite                    | LA-ICP-MS                                      | Tian <i>et al.</i> 2010      | Temora 2,<br>R33  | Y               | Y              | 282.9±2.5        | 8.8         | 1                             |
| Yingmai 30    | 290.9±4.1           | 6330 m                                          | Rhyolite                    | LA-ICP-MS                                      | Tian <i>et al.</i> 2010      | Temora 2,<br>R33  | Y               | Y              | 290.9±4.1        | 3.0         | 1                             |
| Yingmai 5     | 286.6±3.3           | 5484 m                                          | Dacite                      | LA-ICP-MS                                      | Tian <i>et al.</i> 2010      | Temora 2,<br>R33  | Y               | Y              | 286.6±3.3        | 9.9         | 1<br>3,<br>incomplete<br>data |
| Xiaohaizi     | 273.0±3.7           | Dyke m                                          | Quartz syenitic<br>porphyry | SHRIMP                                         | Chen <i>et al.</i> 2010      | TEM 2             | Y               | Y <sup>b</sup> | UE               |             |                               |
| Keping        | 279.0±4.5           | Top Kaipazileike<br>ultramafic-mafic<br>complex | Basalt                      | SHRIMP                                         | Chen <i>et al.</i> 2010      | TEM 2             | Y               | Y              | Basalt zircon    |             | 4                             |
| Piqiang       | 276±4               |                                                 | Gabbro                      | SHRIMP                                         | Zhang <i>et al.</i><br>2010a | TEMORA,<br>SL13   | Y               | Y              | 278.5 ± 5.9      | 7.6         | 2, big span                   |
| Halajun       | 278±3               | Halajun plutons 1                               | Granite                     | SHRIMP                                         | Zhang <i>et al.</i><br>2010a | TEMORA,<br>SL13   | Y               | Y              | 274.6 ± 2.2      | 1.1         | 1                             |
| Halajun       | 278±3               | Halajun plutons 2<br>Bottom                     | Granite                     | SHRIMP                                         | Zhang <i>et al.</i><br>2010a | TEMORA,<br>SL14   | Y               | Y              | All negative RHO |             | 4                             |
| Keping        | 291.9±2.2           | Kupukuziman                                     | Basalt                      | LA-ICP-MS                                      | Zhang <i>et al.</i><br>2010b | NIST610,<br>91500 | Y               | Y              | Basalt zircon    |             | 4                             |
| Keping        | 297.4±5.6,293.9±4.6 | Top Kupukuziman                                 | Dolerite                    | LA-ICP-MS                                      | Zhang <i>et al.</i><br>2010b | NIST610,<br>91500 | Y               | Y              | Basalt zircon    |             | 4                             |
| Keping        | 274.08±2.35         | Kaipazileike                                    | Basalt                      | <sup>40</sup> Ar- <sup>39</sup> Ar             | Zhang <i>et al.</i> 2010c    | Bern4M            | Y               | Y              | no plateau       |             | 4                             |
| Keping        | 271.93±3.67         | Kaipazileike                                    | Basalt                      | <sup>40</sup> Ar- <sup>39</sup> Ar             | Zhang <i>et al.</i> 2010c    | Bern4M            | Y               | Y              | no plateau       |             | 4                             |
| Keping        | 282.90±1.55         | Kupukuziman                                     | Basalt                      | <sup>40</sup> Ar- <sup>39</sup> Ar             | Zhang <i>et al.</i> 2010c    | Bern4M            | Y               | Y              | altered          |             | 4                             |
| Tangwangcheng | 262.30±4.05         | Dyke                                            | Diabase                     | <sup>40</sup> Ar- <sup>39</sup> Ar             | Zhang <i>et al.</i> 2010c    | Bern4M            | Y               | Y              | no plateau       |             | 4                             |
| Xiaohaizi     | 285.38±8.47         | Dyke                                            | Diabase                     | <sup>40</sup> Ar- <sup>39</sup> Ar             | Zhang <i>et al.</i> 2010c    | Bern4M            | Y               | Y              | no plateau       |             | 4                             |
| Z 1           | 268.88±4.15         | Unknown                                         | Diabase                     | <sup>40</sup> Ar- <sup>39</sup> Ar             | Zhang <i>et al.</i> 2010c    | Bern4M            | Y               | Y              | no plateau       |             | 4                             |
| Z 16          | 271.05±3.47         | Unknown                                         | Diabase                     | <sup>40</sup> Ar- <sup>39</sup> Ar             | Zhang <i>et al.</i> 2010c    | Bern4M            | Y               | Y              | no plateau       |             | 4                             |
| Piqiang       | 265.5±1.2           | Gabbroid<br>Bottom                              | Gabbroid                    | plagioclase <sup>40</sup> Ar- <sup>39</sup> Ar | Zhou <i>et al.</i> 2010      | N                 | Y               | Y              | no plateau       |             | 4                             |
| Keping        | 289.5±2.0           | Kupukuziman                                     | Basalt                      | SHRIMP                                         | Yu <i>et al.</i> 2011a       | TEMORA,<br>M257   | Y               | Y              | Basalt zircon    |             | 4                             |
| Keping        | 288±2.0             | Top Kaipazileike<br>Dyke(coarse-<br>grained)    | Basalt                      | SHRIMP                                         | Yu <i>et al.</i> 2011a       | TEMORA,<br>M257   | Y               | Y              | Basalt zircon    |             | 4                             |
| Bachu         | 311.4±6.9           |                                                 | Diabase                     | K-Ar                                           | Li <i>et al.</i> 2011        | N<br>91500,       | N               | N              | UE               |             | 4                             |
| Xiaohaizi     | 279.7±2.0           | Syenite body                                    | Syenite body                | SIMS                                           | Wei & Xu 2011                | Qinghu            | Y               | Y              | 279.7±2.0        | 0.26        | 1                             |
| S79-3         | 279.6±3.0           | 4876.5 m                                        | Dacite                      | LA-ICP-MS                                      | Yu <i>et al.</i> 2011b       | N                 | Y               | Y              | 279.6±3.0        | 0.37        | 1                             |

|            |                      |                                         |                          |                                    |                          |                        |   |   |   |                                        |       |             |
|------------|----------------------|-----------------------------------------|--------------------------|------------------------------------|--------------------------|------------------------|---|---|---|----------------------------------------|-------|-------------|
| S99        | 273.7±3.2            | 5263 m                                  | Dacite                   | LA-ICP-MS                          | Yu <i>et al.</i> 2011b   |                        | N | Y | Y | 273.7±3.2                              | 0.28  | 1           |
| S102-1     | 281.0±3.0            | 4908 m                                  | Dacite                   | LA-ICP-MS                          | Yu <i>et al.</i> 2011b   |                        | N | Y | Y | 281.0±3.0                              | 0.53  | 1           |
| S114       | 276.6±2.7            | 4649.5 m                                | Dacite                   | LA-ICP-MS                          | Yu <i>et al.</i> 2011b   |                        | N | Y | Y | 276.6±2.7                              | 0.81  | 1           |
| Xiaohaizi  | 284.3±2.8            | Dyke                                    | Quartz syenitic porphyry | SHRIMP                             | Li <i>et al.</i> 2011    | TEMORA                 |   | Y | Y | 282.6 ± 2.2                            | 1.05  | 1           |
| Yangta 6   | 261.1±4.89           | 5788 m                                  | Basalt                   | <sup>40</sup> Ar- <sup>39</sup> Ar | Liu <i>et al.</i> 2012   |                        | N | Y | Y | no plateau                             |       | 4           |
| Yangta 6   | 252.32±3.47          | 5785 m                                  | Basalt                   | <sup>40</sup> Ar- <sup>39</sup> Ar | Liu <i>et al.</i> 2012   |                        | N | Y | Y | no plateau                             |       | 4           |
| Yangta 6   | 367.44±3.01          | 5783 m                                  | Basalt                   | <sup>40</sup> Ar- <sup>39</sup> Ar | Liu <i>et al.</i> 2012   |                        | N | Y | Y | no plateau                             |       | 4           |
| Yingmai 16 | 266.92±1.73          | 5195 - 5204 m                           | Rhyolite                 | <sup>40</sup> Ar- <sup>39</sup> Ar | Liu <i>et al.</i> 2012   |                        | N | Y | Y | no plateau                             |       | 4           |
| Yudong 2   | 248.84±4.75          | 5890 - 5091 m Bottom                    | Metamorphic diabase      | <sup>40</sup> Ar- <sup>39</sup> Ar | Liu <i>et al.</i> 2012   |                        | N | Y | Y | no plateau                             |       | 4           |
| Keping     | 291.9±2.2            | Kupukuziman                             | Basalt                   | LA-ICP-MS                          | Zhang <i>et al.</i> 2012 | 91500, GJ-1            |   | Y | Y | Basalt zircon                          |       | 4           |
| Keping     | 297.4±5.6, 293.9±4.6 | Top Kupukuziman                         | Dolerite                 | LA-ICP-MS                          | Zhang <i>et al.</i> 2012 | 91500, GJ-1            |   | Y | Y | Basalt zircon                          |       | 4           |
| Keping     | 295.3±4.1, 291.9±4.4 | 2nd flow of KZ                          | Basalt                   | LA-ICP-MS                          | Zhang <i>et al.</i> 2012 | 91500, GJ-1            |   | Y | Y | Basalt zircon                          |       | 4           |
| Halajun    | 272.7±1.1            | Kezi'ertuo plutons                      | Granite                  | LA-ICP-MS                          | Huang <i>et al.</i> 2012 | Plesovice              |   | Y | Y | 272.7±1.1                              | 0.74  | 1           |
| Wajilitag  | 282                  | NA                                      | NA                       | Cameca                             | Huang <i>et al.</i> 2012 | Unpublished data       | N | N | N | UE                                     |       | 4           |
| Halajun    | 268.6±1.5            | Halajun plutons 3                       | Granite                  | LA-ICP-MS                          | Zhang & Zou 2013         | 91500                  |   | Y | Y | 268.6 ± 2.0                            | 1.6   | 1           |
| Halajun    | 268.8±1.7            | Halajun plutons 4                       | Granite                  | LA-ICP-MS                          | Zhang & Zou 2013         | 91500                  |   | Y | Y | 268.7 ± 1.6                            | 0.94  | 1           |
| Halajun    | 271.0±2.2            | Halajun plutons 5                       | Granite                  | LA-ICP-MS                          | Zhang & Zou 2013         | 91500                  |   | Y | Y | No concordant                          |       | 4           |
| Halajun    | 276.7±0.9            | Guerlale plutons                        | Granite                  | LA-ICP-MS                          | Zhang & Zou 2013         | 91500                  |   | Y | Y | 271.4 ± 1.6                            | 5.5   | 2, big span |
| Halajun    | 272.4±1.1            | Kezile plutons ultramafic-mafic complex | Granite                  | LA-ICP-MS                          | Zhang & Zou 2013         | 91500                  |   | Y | Y | 275.3 ± 1.1                            | 3.6   | 2, big span |
| Piqiang    | 262.3±2.1            | ultramafic-mafic complex                | Gabbro                   | LA-ICP-MS                          | Zhang & Zou 2013         | 91500                  |   | Y | Y | 262.3±2.1                              | 0.6   | 1           |
| Piqiang    | 261.7±1.8            | ultramafic-mafic complex                | Leucogabbro              | LA-ICP-MS                          | Zhang & Zou 2013         | 91500                  |   | Y | Y | 261.5±1.8                              | 0.14  | 1           |
| Wajilitag  | 299.8 ± 4.3          | kimberlitic pipe                        | Kimberlite               | Perovskite SIMS                    | Zhang <i>et al.</i> 2013 | Ice River perovskite   |   | Y | Y | Huge span, too big RHO, unclear origin | 0.61  | 3           |
| Wajilitag  | 300.8 ± 4.7          | kimberlitic dyke                        | Kimberlite               | Baddeleyite SIMS                   | Zhang <i>et al.</i> 2013 | Phalaborwa baddeleyite |   | Y | Y | Huge span, grouped                     | 2.5   | 3           |
| Wajilitag  | 300.5 ± 4.4          | kimberlitic dyke                        | Kimberlite               | Baddeleyite SIMS                   | Zhang <i>et al.</i> 2013 | Phalaborwa baddeleyite |   | Y | Y | Huge span                              | 2.5   | 3           |
| Wenquan    | 286.8 ± 0.5          | Wenquan                                 | Rhyolite                 | CA-TIMS                            | Liu <i>et al.</i> 2014   | NBS-982                |   | Y | Y | 284.20 ± 1.60                          | 0.074 | 1           |
| Keping     | 287.3±4.0            | Kaipaizileike                           | Basalt                   | <sup>40</sup> Ar- <sup>39</sup> Ar | Wei <i>et al.</i> 2014   | ZBH-2506               |   | Y | Y | no plateau                             |       | 4           |
| Keping     | 287.9±4.1            | Kaipaizileike                           | Basalt                   | <sup>40</sup> Ar- <sup>39</sup> Ar | Wei <i>et al.</i> 2014   | ZBH-2506               |   | Y | Y | no plateau                             |       | 4           |
| Halahatang | 287.2±2.0            | overlying basalt                        | trachydacite             | SIMS                               | this paper               | Plesovice, Qinghu      |   | Y | Y |                                        | 0.87  |             |
| Wajilitag  | 283.2±2.0            | Layered intrusion                       | clinopyroxenite          | SIMS                               | this paper               | Plesovice, Qinghu      |   | Y | Y |                                        | 0.36  |             |

Note: a, secondary source: data mentioned in the secondary source, but the original source is inaccessible (marked as \*, and we do not list them in reference) or cannot be found in the original source; b, all  $^{40}\text{Ar}$ - $^{39}\text{Ar}$  data are whole rock  $^{40}\text{Ar}$ - $^{39}\text{Ar}$  data, if not specifically labeled; c, all the LA-ICP-MS, SHRIMP, SIMS, CA-TIMS dates are done on zircon, if not specifically labeled; d, UE: Unable to Evaluate; e, 1: robust, 2: with less precision and accuracy, for reference only, 3: with large error, 4: lack critical information, cannot be used. Also note that (1) all the raw data can be found in the Supplementary material, (2) the table contains 113 ages in total, including 2 ages of this paper, but not including the 5 detrital zircon data.

## References

- Chen, H.L., Yang, S.F., Dong, C.W., Jia, C.Z., Wei, G.Q. & Wang, Z.G. 1997a. Confirmation of Permian basite zone in Tarim Basin and its tectonic significance. *Geochimica*, 26(6), 77-87. (in Chinese with English abstract)
- Chen, H.L., Yang, S.F., Dong, C.W., Zu, G.Q., Jia, C.Z., Wei, G.Q. & Wang, Z.G. 1997b. Geological thermal events in Tarim Basin. *Chinese Science Bulletin*, 42(7), 580-584.
- Chen, H.L., Yang, S.F., Jia, C.Z., Dong, C.W. & Wei, G.Q. 1998. Confirmation of Permian intermediate-acid igneous rock zone and a new understanding of tectonic evolution in the northern part of the Tarim basin. *Acta Mineralogical Sinica*, 18(3), 370-376. (in Chinese with English abstract)
- Huang, H., Zhang, Z.C., Kusky, T., Santosh, M., Zhang, S., Zhang, D.Y., Liu, J.L. & Zhao, Z.D. 2012. Continental vertical growth in the transitional zone between South Tianshan and Tarim, western Xinjiang, NW China: Insight from the Permian Halajun A1-type granitic magmatism. *Lithos*, 155, 49-66.
- Li, C.N., Lu, F.X. & Chen, M.H. 2001. Research on petrology of the Wajilitag complex body in north edge in the Tarim Basin. *Xinjiang Geology* 19 (1), 38-43. (in Chinese with English abstract)

- Li, Y., Su, W., Kong, P., Qian, Y.X., Zhang, K.L., Zhang, M.L., Chen, Y., Cai, X.Y. & You, D.H. 2007. Zircon U–Pb ages of the Early Permian magmatic rocks in the Tazhong–Bachu region, Tarim Basin by LA-ICP-MS. *Acta Petrologica Sinica*, 23 (5), 1097–1107. (in Chinese with English abstract)
- Li, Z.L., Yang, S.F., Chen, H.L., Langmiur, C.H., Yu, X., Lin, X.B. & Li, Y.Q. 2008. Chronology and geochemistry of Taxinan basalts from the Tarim Basin: evidence for Permian plume magmatism. *Acta Petrologica Sinica*, 24(5), 959–970. (in Chinese with English abstract)
- Li, Z.L., Chen, H.L., Song, B., Li, Y.Q., Yang, S.F. & Yu, X. 2011. Temporal evolution of the Permian large igneous province in Tarim Basin, Northwest China. *Journal of Asian Earth Sciences*, 42, 917–927.
- Liu, C.X., Xu, B.L., Zhou, T.R., Lu, F.X., Tong, Y. & Cai, J.H. 2004. Petrochemistry and tectonic significance of Hercynian alkaline rocks along the northern margin of the Tarim platform and its adjacent area. *Xinjiang Geology*, 22(1), 43-49. (in Chinese with English abstract)
- Liu, Y.L., Hu, X.F., Huang, Z.B., Wu, G.Y., Zheng, D.M., Shen, Y.M., Zhao, Y. & Liu, Y.J. 2012.  $^{40}\text{Ar}$ - $^{39}\text{Ar}$  geochronology and geochemistry of the volcanic rocks from the west segment of Tabei uplift, Tarim Basin. *Acta Petrologica Sinica*, 28(8), 2423-2434. (in Chinese with English abstract).
- Liu, H.Q., Xu, Y.G., Tian, W., Zhong, Y.T., Mundil, R., Li, X.H. & Shangguan, S. M. 2014. Origin of two types of rhyolites in the Tarim Large Igneous Province: Consequences of incubation and melting of a mantle plume. *Lithos*, in press.
- Sun, L.H., Wang, Y.J., Fan, W.M. & Zi, J.W. 2008. A further discussion of the petrogenesis and tectonic implication of the Mazhashan syenites in the Bachu area. *Journal of Jilin University (Earth Science Edition)*, 38(1), 8-20. (in Chinese with English abstract)
- Sun, Y., Xiao, Y.F., Zhao, X.K., Qian, Y.X., Xiao, G.W. & Liu, H.Q. 2009. The zircon U-Pb age of Mazha'erTage alkalic complex in the Tarim Basin and its geologic significance. *Acta Geologica Sinica*, 83(6), 775-781. (in Chinese with English abstract)
- Tian, W., Campbell, I.H., Allen, C., Guan, P., Pan, W., Chen, M.M., Yu, H. & Zhu, W. P. 2010. The Tarim picrate-basalt-rhyolite suite, a Permian flood basalt from northwest China with contrasting rhyolites produced by fractional crystallization and anatexis. *Contributions to Mineralogy and Petrology*, 160 (3), 407-425.
- Wei, X. & Xu, Y.G. 2011. Petrogenesis of Xiaohaizi syenite complex from Bachu area, Tarim. *Acta Petrologica Sinica*, 27(10), 2984- 3004. (in Chinese with English abstract)
- Wei, X., Xu, Y.G., Feng, Y.X. & Zhao, J.X. 2014. Plume–lithosphere interaction in the generation of the Tarim large igneous province, NW China: geochronological and geochemical constraints. *American Journal of Science*, 314, 314–356.

- Yang, S.F., Chen, H.L., Dong, C.W., Jia, C.Z. & Wang, Z.G. 1996. The discovery of Permian syenite inside Tarim Basin and its geodynamic significance. *Geochimica*, 25(2), 121-128. (in Chinese with English abstract).
- Yang, S.F., Chen, H.L., Ji, D.W., Li, Z.L., Dong, C.W., Jia, C.Z. & Wei, G.Q. 2005. Geological process of early to middle Permian magmatism in Tarim Basin and its geodynamic significance. *Geological Journal of China Universities*, 11(4), 504-511. (in Chinese with English abstract).
- Yang, S.F., Li, Z.L., Chen, H.L., Chen, W. & Yu, X. 2006a.  $^{40}\text{Ar}/^{39}\text{Ar}$  dating of basalts from Tarim Basin, NW China and its implication to a Permian thermal tectonic event. *Journal of Zhejiang University - Science A* 7 (Supp. II), 170–174.
- Yang, S.F., Li, Z.L., Chen, H.L., Xiao, W.J., Yu, X., Lin, X.B. & Shi, X.G. 2006b. Discovery of a Permian quartz syenitic porphyritic dyke from the Tarim Basin and its tectonic implications. *Acta Petrologica Sinica*, 22 (5), 1405–1412. (in Chinese with English abstract)
- Yang, S.F., Li, Z.L. & Chen, H.L. 2007. Permian bimodal dyke of Tarim Basin, NW China: Geochemical characteristics and tectonic implications. *Gondwana Research*, 12, 113-120.
- Yu, X. 2009. Magma evolution and seep geological processes of Early Permian Tarim Large Igneous Province. Ph.D. Dissertation. Hangzhou: Zhejiang University, 1-136. (in Chinese with English summary)
- Yu, X., Yang, S.F., Chen, H.L., Chen, Z.Q., Li, Z.L., Batt, G.E. & Li, Y.Q. 2011a. Permian flood basalts from the Tarim Basin, Northwest China: SHRIMP zircon U-Pb dating and geochemical characteristics. *Gondwana Research*, 20(2-3), 485-497.
- Yu, J.C., Mo, X.X., Dong, G.C., Yu, X.H., Xing, F.C., Li, Y. & Huang, X.K. 2011b. Felsic volcanic rocks from northern Tarim, NW China: Zircon U-Pb dating and geochemical characteristics. *Acta Petrologica Sinica*, 27(7), 2184-2194. (in Chinese with English abstract)
- Zhang, C.L., Li, X.H., Li, Z.X., Ye, H.M. & Li, C.N. 2008. A Permian layered intrusive complex in the Western Tarim Block, northwestern China: product of a Ca. 275–Ma mantle plume? *Journal of Geology*, 116(3), 269–287.
- Zhang, H.A., Li, Y.J., Wu, G.Y., Su, W., Qian, Y.X., Meng, Q.L., Cai, X.Y., Han, L.J., Zhao, Y. & Liu, Y.L. 2009. Isotopic geochronology of Permian igneous rocks in the Tarim Basin. *Chinese Journal of Geology*, 44 (1), 137–158. (in Chinese with English abstract).
- Zhang, C.L., Xu, Y.G., Li, Z.X., Wang, H.Y. & Ye, H.M. 2010a. Diverse Permian magmatism in the Tarim Block, NW China: Genetically linked to the Permian Tarim mantle plume? *Lithos*, 119 (3-4): 537-552.

- Zhang, D.Y., Zhou, T.F., Yuan, F., Fan, Y., Liu, S. & Du, H.X. 2010b. LA-ICPMS U-Pb ages, Hf isotope characteristics of zircons from basalts in the Kupukuziman Formation, Keping area, Tarim Basin. *Acta Petrologica Sinica*, 26(3): 963- 974. (in Chinese with English abstract)
- Zhang, S.B., Ni, Y.N., Gong, F.H., Lu, H.N., Huang, Z.B. & Lin, H.L. 2003. A Guide to the Stratigraphic Investigation on the Periphery of the Tarim Basin. Petroleum Industry Press, Beijing, p. 280. (in Chinese and English).
- Zhang, Y.T., Liu, J.Q. & Guo, Z.F. 2010c. Permian basaltic rocks in the Tarim basin, NW China: implications for plume–lithosphere interaction. *Gondwana Research*, 18, 596–610.
- Zhou, L.X., Hu, S.L., Wang, L.G., Li, Y.J., Huang, Z.B., Zhu, H.Y., Zhao, Y. & Liu, Y.L. 2010. The age of Piqiang gabbroid, NW margin of Tarim Basin, NW China. *Chinese Journal of Geology*, 45(5), 1057-1065. (in Chinese with English abstract)
- Zhang, D.Y., Zhou, T.F., Yuan, F., Jowitt, S.M., Fan, Y. & Liu, S. 2012. Source, evolution and emplacement of Permian Tarim Basalts: evidence from U–Pb dating, Sr–Nd–Pb–Hf isotope systematics and whole rock geochemistry of basalts from the Keping area, Xinjiang Uygur Autonomous region, northwest China. *Journal of Asian Earth Sciences*, 49, 175–190.
- Zhang, D.Y., Zhang, Z.C., Santosh, M., Cheng, Z., He, H. & Kang, J. 2013. Perovskite and baddeleyite from kimberlitic intrusions in the Tarim large igneous province signal the onset of an end-Carboniferous mantle plume. *Earth and Planetary Science Letters*, 361, 238–248.
- Zhang, C.L. & Zou, H.B. 2013. Permian A-type granites in Tarim and western part of Central Asian Orogenic Belt (CAOB): Genetically related to a common Permian mantle plume? *Lithos*, 172, 47-60.
