# Supplementary material
Source: publisher figshare collection journal article supplement (https://geolsoc.figshare.com/articles/dataset/_/3454061)
Supplement: Supplementary file 3 [file 1]

Sample: XH-8

| Step | T/°C | <sup>39</sup> Ar(%) | <sup>40</sup> Ar/ <sup>39</sup> Ar | <sup>39</sup> Ar/ <sup>37</sup> Ar | Age/Ma | error |
|------|------|---------------------|------------------------------------|------------------------------------|--------|-------|
| 1    | 500  | 4.2                 | 17.59                              | 11.55                              | 305.6  | 2.4   |
| 2    | 650  | 6.5                 | 11.04                              | 31.81                              | 249.9  | 1.4   |
| 3    | 750  | 12.9                | 10.05                              | 25.37                              | 277.7  | 1.3   |
| 4    | 900  | 23.3                | 9.8                                | 32.33                              | 277.9  | 1.3   |
| 5    | 1050 | 25.4                | 9.74                               | 51.91                              | 277.7  | 1.3   |
| 6    | 1200 | 18.9                | 9.73                               | 41.3                               | 276.7  | 1.3   |
| 7    | 1320 | 8.8                 | 9.75                               | 4.91                               | 272.7  | 1.4   |

[Yang et al. \(1996\)](#)

Sample: KP-4

---

| Step | T/°C | <sup>39</sup> Ar(%) | <sup>40</sup> Ar/ <sup>39</sup> Ar | <sup>39</sup> Ar/ <sup>37</sup> Ar | Age/Ma | error |
|------|------|---------------------|------------------------------------|------------------------------------|--------|-------|
| 1    | 500  | 2.09                | 16.29                              | 12.46                              | 155.5  | 3.4   |
| 2    | 650  | 5.96                | 13.18                              | 18.5                               | 240.6  | 1.9   |
| 3    | 750  | 20.45               | 10.43                              | 27.92                              | 282.3  | 1.4   |
| 4    | 900  | 17.87               | 9.88                               | 32.47                              | 276.1  | 1.3   |
| 5    | 1050 | 26.42               | 9.99                               | 63.93                              | 279.2  | 1.3   |
| 6    | 1200 | 16.18               | 9.86                               | 35.72                              | 276.5  | 1.3   |
| 7    | 1320 | 11.03               | 9.93                               | 6.13                               | 278.5  | 1.4   |

---

[Chen \*et al.\* \(1997\)](#)

Sample: Yg20-21 and Txn25-21

| Temp(°C) | <sup>40</sup> Ar/ <sup>39</sup> Ar | <sup>36</sup> Ar/ <sup>39</sup> Ar | <sup>37</sup> Ar/ <sup>39</sup> Ar | <sup>38</sup> Ar/ <sup>39</sup> Ar | <sup>39</sup> Ar(k) | <sup>39</sup> Ar(%) | Age (Ma) | ± 2σ (Ma) |
|----------|------------------------------------|------------------------------------|------------------------------------|------------------------------------|---------------------|---------------------|----------|-----------|
| 500      | 37.6607                            | 0.0657                             | 0.6128                             | 0.0104                             | 3.45                | 0.06                | 346      | 16        |
| 600      | 18.6196                            | 0.0133                             | 1.162                              | 0.0277                             | 59.69               | 1.19                | 284.6    | 3.5       |
| 700      | 19.4889                            | 0.0025                             | 0.8019                             | 0.0138                             | 184.01              | 4.65                | 354.8    | 3.7       |
| 800      | 18.3428                            | 0.0027                             | 0.9937                             | 0.0164                             | 128.93              | 7.08                | 334.4    | 3.3       |
| 900      | 17.7489                            | 0.0013                             | 1.1263                             | 0.0145                             | 339.05              | 13.47               | 331.6    | 5.3       |
| 950      | 16.8931                            | 0.0007                             | 0.8518                             | 0.0135                             | 508.72              | 23.04               | 319.1    | 3.2       |
| 1000     | 16.4271                            | 0.0006                             | 0.8096                             | 0.0128                             | 669.96              | 35.66               | 311.4    | 3         |
| 1050     | 16.1896                            | 0.0009                             | 0.9556                             | 0.0132                             | 379.07              | 42.8                | 306.1    | 3.1       |
| 1100     | 15.8484                            | 0.001                              | 1.2463                             | 0.0142                             | 735.38              | 56.64               | 299.8    | 3.6       |
| 1150     | 15.8091                            | 0.0012                             | 1.6463                             | 0.0161                             | 429.11              | 64.72               | 298.7    | 4.7       |
| 1250     | 14.9724                            | 0.0031                             | 6.6931                             | 0.0157                             | 1382.69             | 90.76               | 281.3    | 3.7       |
| 1320     | 15.7009                            | 0.0055                             | 7.2199                             | 0.0161                             | 348.34              | 97.32               | 282.6    | 3.2       |
| 1400     | 18.6203                            | 0.0156                             | 7.1004                             | 0.019                              | 142.41              | 100                 | 281.2    | 3.9       |

Step heating for Yg20-21; W=120.00 mg; J=0.011552; m: measured isotopic ratios; F=<sup>40</sup>Ar/<sup>39</sup>Ar, is the ratio of radiogenic <sup>40</sup>Ar and <sup>39</sup>Ar

| Temp(°C) | <sup>40</sup> Ar/ <sup>39</sup> Ar | <sup>36</sup> Ar/ <sup>39</sup> Ar | <sup>37</sup> Ar/ <sup>39</sup> Ar | <sup>38</sup> Ar/ <sup>39</sup> Ar | <sup>39</sup> Ar(k) | <sup>39</sup> Ar(%) | Age (Ma) | ± 2 | □□ |
|----------|------------------------------------|------------------------------------|------------------------------------|------------------------------------|---------------------|---------------------|----------|-----|----|
| 500      | 15.9835                            | 0.015                              | 0.3008                             | 0.077                              | 8.88                | 0.13                | 227.6    | 4.4 |    |
| 600      | 19.1498                            | 0.0192                             | 1.3516                             | 0.0236                             | 55.2                | 0.93                | 264.2    | 6.5 |    |
| 700      | 20.3905                            | 0.0029                             | 1.3133                             | 0.015                              | 215.89              | 4.07                | 370.9    | 5.7 |    |
| 800      | 18.6857                            | 0.0015                             | 1.1296                             | 0.0171                             | 218.98              | 7.25                | 348.4    | 5.7 |    |
| 900      | 17.384                             | 0.0013                             | 1.0355                             | 0.013                              | 560.95              | 15.41               | 326.8    | 3.8 |    |
| 950      | 16.0467                            | 0.0009                             | 1.5455                             | 0.013                              | 1015.06             | 30.17               | 306      | 3.7 |    |
| 1000     | 15.3797                            | 0.0009                             | 2.0684                             | 0.0127                             | 1081.6              | 45.9                | 294.6    | 3.2 |    |
| 1050     | 15.2649                            | 0.0007                             | 1.5573                             | 0.0132                             | 1358.61             | 65.65               | 292.8    | 4.4 |    |
| 1100     | 14.9042                            | 0.0007                             | 1.2368                             | 0.0141                             | 1171.74             | 82.69               | 286.3    | 3.1 |    |
| 1150     | 14.7412                            | 0.0013                             | 1.7826                             | 0.016                              | 546.89              | 90.64               | 280.8    | 2.9 |    |
| 1250     | 14.0176                            | 0.0031                             | 7.9845                             | 0.0186                             | 423.87              | 96.8                | 267.6    | 2.7 |    |

1400      15.1904      0.0093      14.8159      0.021      219.99      100      265.6      3

Step heating for Txn25-21; W=120.00 mg; J=0.011618; m: measured isotopic ratios;  $F = \frac{^{40}\text{Ar}}{^{39}\text{Ar}}$ , is the ratio of radiogenic  $^{40}\text{Ar}$  and  $^{39}\text{Ar}$

---

[Yang \*et al.\* \(2006\)](#)

Sample: Fang1-10

| Temp(°C) | <sup>39</sup> Ar(%) | Atoms(%) | <sup>36</sup> Ar/ <sup>39</sup> Ar | <sup>37</sup> Ar/ <sup>39</sup> Ar | <sup>38</sup> Ar/ <sup>39</sup> Ar | <sup>40</sup> Ar/ <sup>39</sup> Ar | <sup>40</sup> Ar/ <sup>36</sup> Ar | Age/Ma | error |
|----------|---------------------|----------|------------------------------------|------------------------------------|------------------------------------|------------------------------------|------------------------------------|--------|-------|
| 700      | 0                   | 78.065   | 0.62610                            | 9.692                              | 0.1353                             | 23.6                               | 377.00                             | 770.6  | 21.8  |
| 800      | 0.001               | 60.001   | 0.22600                            | 6.771                              | 0.05664                            | 11.04                              | 488.60                             | 674.8  | 9.5   |
| 900      | 0.002               | 44.203   | 0.07172                            | 3.531                              | 0.02492                            | 47.33                              | 659.90                             | 432    | 6.3   |
| 950      | 0.004               | 34.672   | 0.03000                            | 2.313                              | 0.01826                            | 25.05                              | 835.10                             | 279.4  | 5     |
| 1000     | 0.01                | 19.337   | 0.01694                            | 2.278                              | 0.01726                            | 42.98                              | 1475.0                             | 338.4  | 2.6   |
| 1040     | 0.023               | 8.717    | 0.00789                            | 4.87                               | 0.01584                            | 22.43                              | 2844.0                             | 343.9  | 1.8   |
| 1060     | 0.035               | 11.641   | 0.01020                            | 4.671                              | 0.01621                            | 22.81                              | 2235.0                             | 338.9  | 1.7   |
| 1080     | 0.046               | 13.793   | 0.01202                            | 3.776                              | 0.01536                            | 23.64                              | 1967.0                             | 242.2  | 1.7   |
| 1100     | 0.056               | 17.407   | 0.01562                            | 2.951                              | 0.01567                            | 25.21                              | 1614.0                             | 348.7  | 1.9   |
| 1130     | 0.066               | 37.84    | 0.04378                            | 2.495                              | 0.02081                            | 33.68                              | 769.30                             | 350.4  | 2.1   |
| 1160     | 0.574               | 7.135    | 0.00512                            | 1.208                              | 0.01282                            | 19.91                              | 3887.0                             | 312.5  | 1.5   |
| 1180     | 0.788               | 7.191    | 0.00518                            | 1.229                              | 0.013                              | 19.98                              | 3855.0                             | 313.4  | 1.5   |
| 1200     | 0.928               | 7.323    | 0.00529                            | 1.24                               | 0.01299                            | 20.05                              | 3789.0                             | 313.9  | 1.7   |
| 1230     | 0.944               | 7.38     | 0.00740                            | 4.264                              | 0.01418                            | 25.16                              | 3402.0                             | 386.5  | 1.9   |
| 1260     | 0.971               | 5.976    | 0.00660                            | 4.488                              | 0.01595                            | 26.82                              | 4067.0                             | 414.9  | 3.2   |
| 1340     | 0.989               | 6.644    | 0.00674                            | 4.946                              | 0.01446                            | 24.26                              | 3597.0                             | 376.8  | 2     |
| 1500     | 1                   | 7.205    | 0.00666                            | 4.561                              | 0.01342                            | 22.41                              | 3368.0                             | 348.8  | 1.9   |

Zhang *et al.* (2009)

Sample: DWG07-1, DWG07-4, LKC07-1, TWC07-1, XHZ07-7, Z1-6 and Z16-2

| Temp(°C)        | $^{40}\text{Ar}^*/^{39}\text{Ar}(\text{k})$ | 1 □   | $^{40}\text{Ar}/^{39}\text{Ar}$ | $^{37}\text{Ar}/^{39}\text{Ar}$ | $^{36}\text{Ar}/^{39}\text{Ar}$ | $^{40}\text{Ar}$<br>(moles) | Age<br>(Ma) | ±      | □ | $^{40}\text{Ar}^*$<br>(%) | $^{39}\text{Ar}(\text{k})$ |
|-----------------|---------------------------------------------|-------|---------------------------------|---------------------------------|---------------------------------|-----------------------------|-------------|--------|---|---------------------------|----------------------------|
| Sample: DWG07-1 |                                             |       |                                 |                                 |                                 |                             |             |        |   |                           |                            |
| 780             | 15.704                                      | 2.246 | 34.783                          | 0.485                           | 0.065                           | 1.791E-14                   | 166.72      | 45.56  |   | 45.13                     | 0.31                       |
| 850             | 17.412                                      | 1.792 | 58.221                          | 1.276                           | 0.139                           | 1.600E-13                   | 183.96      | 36.00  |   | 29.87                     | 1.67                       |
| 900             | 29.906                                      | 0.478 | 60.291                          | 1.323                           | 0.103                           | 5.162E-13                   | 305.30      | 8.98   |   | 49.55                     | 5.19                       |
| 950             | 29.728                                      | 0.120 | 33.060                          | 1.345                           | 0.012                           | 7.226E-13                   | 303.63      | 2.25   |   | 89.82                     | 13.26                      |
| 990             | 29.039                                      | 0.100 | 30.212                          | 1.231                           | 0.004                           | 6.506E-13                   | 297.14      | 1.89   |   | 96.02                     | 13.06                      |
| 1030            | 28.556                                      | 0.102 | 29.445                          | 1.189                           | 0.003                           | 5.540E-13                   | 292.57      | 1.93   |   | 96.88                     | 11.41                      |
| 1080            | 27.860                                      | 0.104 | 29.630                          | 1.117                           | 0.006                           | 5.476E-13                   | 285.98      | 1.97   |   | 93.94                     | 11.21                      |
| 1130            | 27.206                                      | 0.121 | 28.717                          | 1.243                           | 0.006                           | 2.732E-13                   | 279.76      | 2.30   |   | 94.64                     | 5.77                       |
| 1190            | 26.417                                      | 0.149 | 28.703                          | 3.252                           | 0.009                           | 3.105E-13                   | 272.23      | 2.86   |   | 91.78                     | 6.55                       |
| 1260            | 26.703                                      | 0.087 | 27.469                          | 5.361                           | 0.004                           | 1.327E-12                   | 274.96      | 1.66   |   | 96.77                     | 29.21                      |
| 1310            | 26.275                                      | 0.304 | 28.374                          | 6.957                           | 0.009                           | 3.839E-14                   | 270.87      | 5.83   |   | 92.06                     | 0.82                       |
| 1380            | 26.030                                      | 0.669 | 33.683                          | 6.919                           | 0.028                           | 2.572E-14                   | 268.53      | 12.82  |   | 76.83                     | 0.46                       |
| 1500            | 24.964                                      | 0.331 | 32.015                          | 7.366                           | 0.026                           | 5.734E-14                   | 258.28      | 6.39   |   | 77.49                     | 1.08                       |
| Sample: DWG07-4 |                                             |       |                                 |                                 |                                 |                             |             |        |   |                           |                            |
| 780             | -4.045                                      | 3.167 | 21.946                          | 0.517                           | 0.088                           | 2.705E-14                   | -45.70      | 72.47  |   | -18.42                    | 1.98                       |
| 850             | -11.995                                     | 4.620 | 44.134                          | 0.924                           | 0.190                           | 1.077E-13                   | -139.02     | 111.30 |   | -27.16                    | 3.92                       |
| 900             | -12.912                                     | 5.895 | 97.713                          | 1.877                           | 0.375                           | 2.618E-13                   | -150.10     | 142.92 |   | -13.19                    | 4.30                       |
| 950             | 18.204                                      | 1.431 | 43.836                          | 2.414                           | 0.088                           | 2.491E-13                   | 192.46      | 28.71  |   | 41.44                     | 9.11                       |
| 1000            | 25.734                                      | 0.269 | 39.304                          | 2.938                           | 0.047                           | 3.423E-13                   | 266.45      | 5.19   |   | 65.31                     | 13.95                      |
| 1050            | 26.870                                      | 0.135 | 29.923                          | 2.433                           | 0.011                           | 2.881E-13                   | 277.35      | 2.58   |   | 89.61                     | 15.43                      |
| 1090            | 26.564                                      | 0.145 | 29.803                          | 1.861                           | 0.012                           | 2.183E-13                   | 274.42      | 2.77   |   | 88.99                     | 11.75                      |
| 1140            | 26.291                                      | 0.114 | 28.997                          | 1.531                           | 0.010                           | 1.784E-13                   | 271.80      | 2.18   |   | 90.55                     | 9.87                       |
| 1190            | 25.611                                      | 0.138 | 29.045                          | 2.863                           | 0.013                           | 1.206E-13                   | 265.26      | 2.67   |   | 87.96                     | 6.65                       |
| 1260            | 26.327                                      | 0.122 | 27.537                          | 13.022                          | 0.009                           | 2.974E-13                   | 272.14      | 2.33   |   | 94.54                     | 17.15                      |
| 1320            | 25.375                                      | 0.210 | 27.537                          | 33.140                          | 0.019                           | 4.441E-14                   | 262.99      | 4.05   |   | 89.55                     | 2.52                       |
| 1450            | 24.735                                      | 0.199 | 30.336                          | 40.614                          | 0.033                           | 6.602E-14                   | 256.80      | 3.85   |   | 78.71                     | 3.37                       |
| Sample: LKC07-1 |                                             |       |                                 |                                 |                                 |                             |             |        |   |                           |                            |

|                 |         |       |         |        |       |           |         |        |        |       |
|-----------------|---------|-------|---------|--------|-------|-----------|---------|--------|--------|-------|
| 780             | -16.936 | 3.159 | 21.109  | 0.882  | 0.129 | 6.177E-14 | -200.47 | 79.08  | -80.17 | 1.82  |
| 850             | 4.203   | 2.053 | 27.144  | 2.547  | 0.078 | 1.138E-13 | 46.49   | 44.83  | 15.45  | 2.61  |
| 900             | 19.949  | 0.947 | 66.279  | 2.923  | 0.158 | 4.072E-13 | 210.74  | 18.89  | 30.02  | 3.82  |
| 940             | 29.679  | 0.098 | 29.582  | 0.508  | 0.000 | 4.263E-13 | 305.26  | 1.85   | 100.29 | 8.98  |
| 980             | 27.213  | 0.090 | 28.614  | 0.958  | 0.005 | 4.494E-13 | 281.77  | 1.72   | 95.02  | 9.78  |
| 1120            | 27.450  | 0.090 | 28.745  | 0.900  | 0.005 | 1.124E-12 | 284.04  | 1.72   | 95.42  | 24.36 |
| 1120            | 27.417  | 0.093 | 28.732  | 0.966  | 0.005 | 4.443E-13 | 283.72  | 1.78   | 95.35  | 9.64  |
| 1160            | 27.290  | 0.096 | 28.346  | 1.271  | 0.004 | 3.832E-13 | 282.50  | 1.84   | 96.17  | 8.42  |
| 1200            | 27.145  | 0.165 | 28.268  | 3.789  | 0.005 | 2.275E-13 | 281.11  | 3.17   | 95.72  | 5.00  |
| 1260            | 27.344  | 0.093 | 28.327  | 9.367  | 0.007 | 7.437E-13 | 283.02  | 1.78   | 95.76  | 16.24 |
| 1310            | 28.643  | 0.151 | 28.387  | 1.593  | 0.000 | 1.900E-13 | 295.43  | 2.88   | 100.76 | 4.17  |
| 1380            | 27.454  | 0.154 | 29.004  | 8.032  | 0.008 | 1.759E-13 | 284.08  | 2.95   | 94.01  | 3.76  |
| 1500            | 26.375  | 0.249 | 31.619  | 6.811  | 0.020 | 7.160E-14 | 273.71  | 4.80   | 82.93  | 1.40  |
| Sample: TWC07-1 |         |       |         |        |       |           |         |        |        |       |
| 780             | -11.981 | 3.713 | 22.569  | 0.247  | 0.117 | 7.364E-14 | -139.86 | 90.12  | -53.07 | 8.30  |
| 840             | -33.333 | 6.151 | 41.010  | 0.637  | 0.252 | 1.011E-13 | -419.56 | 174.27 | -81.24 | 6.27  |
| 910             | -27.014 | 5.970 | 159.677 | 1.581  | 0.632 | 4.614E-13 | -332.19 | 161.16 | -16.90 | 7.35  |
| 960             | 14.570  | 0.479 | 42.686  | 2.755  | 0.096 | 1.348E-13 | 156.68  | 9.87   | 34.05  | 8.02  |
| 1010            | 23.209  | 0.321 | 31.694  | 3.103  | 0.030 | 1.160E-13 | 243.55  | 6.30   | 73.03  | 9.29  |
| 1050            | 25.243  | 0.264 | 29.484  | 2.148  | 0.015 | 1.288E-13 | 263.41  | 5.13   | 85.46  | 11.10 |
| 1100            | 25.662  | 0.131 | 29.436  | 1.431  | 0.013 | 1.691E-13 | 267.47  | 2.54   | 87.07  | 14.61 |
| 1150            | 25.234  | 0.127 | 28.345  | 1.318  | 0.011 | 1.315E-13 | 263.32  | 2.46   | 88.92  | 11.80 |
| 1200            | 24.525  | 0.202 | 28.668  | 2.591  | 0.015 | 8.625E-14 | 256.42  | 3.94   | 85.36  | 7.64  |
| 1260            | 24.482  | 0.276 | 28.318  | 13.024 | 0.017 | 6.393E-14 | 256.00  | 5.39   | 85.49  | 5.68  |
| 1340            | 24.377  | 0.247 | 28.671  | 46.434 | 0.030 | 7.835E-14 | 254.98  | 4.82   | 81.66  | 6.68  |
| 1500            | 23.927  | 0.570 | 32.652  | 61.995 | 0.050 | 4.396E-14 | 250.59  | 11.14  | 69.41  | 3.25  |
| Sample: XHZ07-7 |         |       |         |        |       |           |         |        |        |       |
| 780             | 1.567   | 0.783 | 19.698  | 0.406  | 0.061 | 3.040E-14 | 17.63   | 17.52  | 7.95   | 1.14  |
| 850             | 3.867   | 1.736 | 47.291  | 4.850  | 0.148 | 1.630E-13 | 43.18   | 38.32  | 8.14   | 2.53  |
| 900             | 7.811   | 1.806 | 58.953  | 5.655  | 0.175 | 2.563E-13 | 86.18   | 38.93  | 13.19  | 3.19  |

|               |        |       |        |        |       |           |        |       |       |       |
|---------------|--------|-------|--------|--------|-------|-----------|--------|-------|-------|-------|
| 950           | 15.210 | 0.918 | 29.032 | 3.239  | 0.048 | 1.426E-13 | 164.19 | 18.95 | 52.25 | 3.61  |
| 1000          | 21.538 | 0.905 | 28.898 | 1.351  | 0.025 | 2.935E-13 | 228.34 | 18.03 | 74.44 | 7.48  |
| 1050          | 25.805 | 0.287 | 32.686 | 1.775  | 0.024 | 4.529E-13 | 270.35 | 5.58  | 78.83 | 10.20 |
| 1100          | 28.325 | 0.133 | 32.668 | 1.615  | 0.015 | 8.815E-13 | 294.70 | 2.56  | 86.59 | 19.86 |
| 1140          | 27.084 | 0.092 | 30.095 | 0.865  | 0.010 | 7.299E-13 | 282.75 | 1.79  | 89.93 | 17.86 |
| 1180          | 26.363 | 0.110 | 32.167 | 1.621  | 0.020 | 6.717E-13 | 275.77 | 2.13  | 81.84 | 15.37 |
| 1220          | 30.538 | 0.282 | 50.766 | 7.958  | 0.071 | 6.771E-13 | 315.82 | 5.36  | 59.75 | 9.76  |
| 1270          | 29.936 | 0.370 | 58.279 | 7.663  | 0.099 | 4.734E-13 | 310.10 | 7.05  | 51.03 | 5.95  |
| 1340          | 27.108 | 0.528 | 60.658 | 6.603  | 0.116 | 1.231E-13 | 282.98 | 10.21 | 44.44 | 1.49  |
| 1450          | 27.783 | 0.493 | 61.623 | 6.963  | 0.117 | 1.334E-13 | 289.50 | 9.48  | 44.82 | 1.59  |
| Sample: Z1-6  |        |       |        |        |       |           |        |       |       |       |
| 780           | 6.134  | 0.989 | 26.476 | 0.789  | 0.069 | 2.993E-14 | 68.33  | 21.62 | 23.15 | 0.90  |
| 850           | 6.153  | 1.964 | 39.603 | 1.051  | 0.113 | 1.706E-13 | 68.54  | 42.93 | 15.52 | 3.42  |
| 900           | 6.883  | 2.629 | 62.983 | 1.096  | 0.190 | 4.207E-13 | 76.49  | 57.23 | 10.92 | 5.30  |
| 950           | 27.827 | 1.965 | 33.283 | 1.567  | 0.019 | 4.025E-13 | 291.16 | 37.99 | 83.50 | 9.60  |
| 1000          | 27.014 | 0.447 | 28.567 | 1.816  | 0.006 | 5.283E-13 | 283.28 | 8.69  | 94.42 | 14.67 |
| 1040          | 27.248 | 0.109 | 28.709 | 1.753  | 0.006 | 4.450E-13 | 285.56 | 2.12  | 94.77 | 12.30 |
| 1080          | 26.971 | 0.114 | 29.051 | 1.501  | 0.008 | 3.066E-13 | 282.87 | 2.21  | 92.72 | 8.38  |
| 1130          | 26.157 | 0.109 | 27.670 | 1.707  | 0.006 | 2.443E-13 | 274.94 | 2.12  | 94.39 | 7.01  |
| 1180          | 25.710 | 0.094 | 27.149 | 3.444  | 0.006 | 1.491E-13 | 270.59 | 1.85  | 94.42 | 4.35  |
| 1240          | 25.300 | 0.089 | 25.662 | 7.328  | 0.004 | 7.084E-13 | 266.58 | 1.75  | 97.98 | 21.80 |
| 1300          | 24.455 | 0.202 | 26.028 | 8.972  | 0.008 | 7.867E-14 | 258.28 | 3.97  | 93.24 | 2.38  |
| 1380          | 25.385 | 0.097 | 25.915 | 9.260  | 0.005 | 2.837E-13 | 267.40 | 1.90  | 97.18 | 8.63  |
| 1500          | 24.094 | 0.238 | 30.651 | 11.437 | 0.026 | 4.881E-14 | 254.71 | 4.69  | 77.84 | 1.25  |
| Sample: Z16-2 |        |       |        |        |       |           |        |       |       |       |
| 780           | 7.274  | 0.494 | 24.859 | 0.808  | 0.060 | 1.118E-14 | 80.54  | 10.69 | 29.24 | 0.31  |
| 850           | -1.431 | 2.109 | 40.554 | 2.281  | 0.143 | 9.419E-14 | -16.27 | 48.20 | -3.52 | 1.58  |
| 900           | 3.418  | 3.653 | 45.335 | 4.243  | 0.143 | 1.861E-13 | 38.29  | 80.97 | 7.51  | 2.80  |
| 950           | 8.973  | 0.704 | 28.275 | 2.959  | 0.066 | 2.460E-13 | 98.84  | 15.10 | 31.66 | 5.93  |
| 1000          | 25.655 | 0.336 | 28.285 | 0.896  | 0.009 | 5.911E-13 | 269.37 | 6.55  | 90.63 | 14.27 |



|      |        |       |        |        |       |           |        |       |       |       |
|------|--------|-------|--------|--------|-------|-----------|--------|-------|-------|-------|
| 1050 | 26.226 | 0.130 | 28.992 | 0.892  | 0.010 | 7.514E-13 | 274.92 | 2.52  | 90.39 | 17.70 |
| 1090 | 26.025 | 0.122 | 28.701 | 0.952  | 0.009 | 4.767E-13 | 272.98 | 2.38  | 90.60 | 11.34 |
| 1140 | 25.555 | 0.088 | 26.883 | 1.192  | 0.005 | 5.111E-13 | 268.39 | 1.71  | 94.96 | 12.98 |
| 1190 | 24.280 | 0.084 | 25.312 | 1.588  | 0.004 | 4.235E-13 | 255.90 | 1.65  | 95.79 | 11.42 |
| 1240 | 24.644 | 0.086 | 26.537 | 8.067  | 0.009 | 7.690E-13 | 259.48 | 1.69  | 92.23 | 19.67 |
| 1290 | 23.210 | 0.193 | 27.840 | 16.721 | 0.021 | 6.373E-14 | 245.36 | 3.82  | 82.18 | 1.54  |
| 1380 | 20.964 | 0.327 | 32.334 | 11.246 | 0.042 | 1.832E-14 | 223.02 | 6.55  | 64.21 | 0.38  |
| 1500 | 15.311 | 2.309 | 75.034 | 10.163 | 0.205 | 8.650E-15 | 165.53 | 47.71 | 20.23 | 0.08  |

J=0.00615 For all

---

[Zhang et al. \(2010\)](#)

Sample: 9-1k

| Temp(°C) | $(^{40}\text{Ar}/^{39}\text{Ar})_m$ | $^{36}\text{Ar}/^{39}\text{Ar})_m$ | $^{37}\text{Ar}/^{39}\text{Ar})_m$ | $^{*40}\text{Ar}/^{39}\text{Ar}$ | $^{39}\text{Ar}$ (E-14 moles) | Age/Ma | error | $^{39}\text{Ar}$ cum/% |
|----------|-------------------------------------|------------------------------------|------------------------------------|----------------------------------|-------------------------------|--------|-------|------------------------|
| 500      | 197.23019                           | 0.61910                            | 1.03740                            | 14.36690                         | 10.15                         | 378.00 | 87.00 | 1.11                   |
| 600      | 48.00310                            | 0.10380                            | 4.09350                            | 17.67920                         | 17.41                         | 455.00 | 41.70 | 3                      |
| 700      | 16.68300                            | 0.02160                            | 7.38150                            | 10.87880                         | 90.87                         | 293.30 | 6.40  | 12.9                   |
| 800      | 11.97710                            | 0.00770                            | 7.22970                            | 10.26490                         | 135.28                        | 277.90 | 4.90  | 27.63                  |
| 900      | 11.43510                            | 0.00710                            | 4.15410                            | 9.66160                          | 148.74                        | 262.70 | 4.20  | 43.82                  |
| 1000     | 11.71460                            | 0.00810                            | 3.68950                            | 9.61450                          | 120.06                        | 261.50 | 3.40  | 56.9                   |
| 1100     | 14.18620                            | 0.01670                            | 3.99890                            | 9.55280                          | 30.72                         | 260.00 | 5.00  | 60.24                  |
| 1200     | 13.72460                            | 0.01420                            | 4.11300                            | 9.85380                          | 39.36                         | 267.60 | 5.10  | 64.53                  |
| 1300     | 12.04710                            | 0.00700                            | 3.29600                            | 10.24770                         | 194.72                        | 277.50 | 4.20  | 85.73                  |
| 1400     | 12.78650                            | 0.00820                            | 4.49870                            | 10.72890                         | 131.05                        | 289.50 | 3.80  | 100                    |

J=0.016227; W=140.50 mg;  $\lambda=5.543e^{-10}/a$ ; \*Ar is radiogenic  $^{40}\text{Ar}$

[Zhou et al. \(2010\)](#)

Sample: YT6-1, YT6-2, YT6-3, YM16-3 and YD2-2

| Step                                                  | Temp(°C) | <sup>40</sup> Ar/ <sup>39</sup> Ar | <sup>37</sup> Ar/ <sup>39</sup> Ar | <sup>36</sup> Ar/ <sup>39</sup> Ar | <sup>40</sup> Ar*/ <sup>39</sup> Ar | <sup>40</sup> Ar* (%) | <sup>39</sup> Ar cum/% | Age (Ma) | ±     | □ |
|-------------------------------------------------------|----------|------------------------------------|------------------------------------|------------------------------------|-------------------------------------|-----------------------|------------------------|----------|-------|---|
| YT6-1 Basalt, J=0.002520 ± 0.000006, Weight = 10.5 mg |          |                                    |                                    |                                    |                                     |                       |                        |          |       |   |
| 1                                                     | 700      | 515.04919                          | 0.89282                            | 1.49051                            | 74.731424                           | 14.50                 | 6.47                   | 312.01   | 67.46 |   |
| 2                                                     | 750      | 168.99626                          | 0.79802                            | 0.32248                            | 73.817029                           | 43.65                 | 4.43                   | 308.50   | 15.16 |   |
| 3                                                     | 800      | 128.54126                          | 0.92493                            | 0.18744                            | 73.284149                           | 56.97                 | 2.97                   | 306.45   | 9.08  |   |
| 4                                                     | 850      | 112.18981                          | 0.67702                            | 0.12902                            | 74.161182                           | 66.07                 | 2.95                   | 309.82   | 6.77  |   |
| 5                                                     | 890      | 93.34155                           | 0.49643                            | 0.07607                            | 70.930653                           | 75.96                 | 2.89                   | 297.38   | 4.52  |   |
| 6                                                     | 930      | 79.49609                           | 0.51006                            | 0.04051                            | 67.594231                           | 84.99                 | 4.42                   | 284.43   | 3.31  |   |
| 7                                                     | 970      | 75.43877                           | 0.54939                            | 0.03158                            | 66.180992                           | 87.69                 | 7.84                   | 278.92   | 3.06  |   |
| 8                                                     | 1010     | 72.59729                           | 0.62523                            | 0.02675                            | 64.775815                           | 89.18                 | 12.23                  | 273.43   | 2.87  |   |
| 9                                                     | 1040     | 74.17975                           | 0.90678                            | 0.03502                            | 63.953921                           | 86.15                 | 10.99                  | 270.20   | 3.03  |   |
| 10                                                    | 1090     | 78.19897                           | 0.81758                            | 0.05589                            | 61.923654                           | 79.06                 | 20.70                  | 262.22   | 3.64  |   |
| 11                                                    | 1130     | 83.70043                           | 0.73961                            | 0.08044                            | 60.418997                           | 71.95                 | 19.56                  | 256.28   | 4.49  |   |
| 12                                                    | 1170     | 88.69902                           | 0.656                              | 0.09078                            | 62.625886                           | 70.26                 | 4.03                   | 264.98   | 4.98  |   |
| 13                                                    | 1220     | 117.35839                          | 0.43463                            | 0.15288                            | 73.235982                           | 62.01                 | 0.51                   | 306.27   | 8.37  |   |
| YT6-2 Basalt, J=0.002521 ± 0.000006, Weight = 10.5 mg |          |                                    |                                    |                                    |                                     |                       |                        |          |       |   |
| 1                                                     | 700      | 177.62584                          | 0.59245                            | 0.40927                            | 56.761194                           | 31.94                 | 15.70                  | 241.84   | 19.35 |   |
| 2                                                     | 740      | 174.60465                          | 0.83201                            | 0.38927                            | 60.205703                           | 34.34                 | 7.93                   | 255.53   | 18.56 |   |
| 3                                                     | 780      | 68.81836                           | 0.46374                            | 0.02837                            | 60.495797                           | 87.87                 | 4.78                   | 256.68   | 6.10  |   |
| 4                                                     | 820      | 70.20153                           | 0.20568                            | 0.02909                            | 61.631976                           | 87.78                 | 4.44                   | 261.17   | 3.88  |   |
| 5                                                     | 860      | 67.85964                           | 0.17711                            | 0.0303                             | 58.928424                           | 86.83                 | 5.02                   | 250.47   | 3.23  |   |
| 6                                                     | 900      | 72.09289                           | 0.49523                            | 0.03954                            | 60.47355                            | 83.85                 | 5.94                   | 256.59   | 4.33  |   |
| 7                                                     | 940      | 69.06135                           | 0.41832                            | 0.03536                            | 58.665831                           | 84.92                 | 7.28                   | 249.42   | 3.59  |   |
| 8                                                     | 980      | 65.57486                           | 0.3943                             | 0.02792                            | 57.374542                           | 87.47                 | 8.60                   | 244.29   | 3.55  |   |
| 9                                                     | 1020     | 66.62644                           | 0.56592                            | 0.02662                            | 58.833748                           | 88.26                 | 10.37                  | 250.09   | 2.98  |   |
| 10                                                    | 1060     | 67.90185                           | 0.58634                            | 0.02605                            | 60.280064                           | 88.73                 | 13.24                  | 255.82   | 3.00  |   |
| 11                                                    | 1100     | 77.60028                           | 0.57915                            | 0.03921                            | 66.227226                           | 85.23                 | 13.36                  | 279.21   | 3.86  |   |
| 12                                                    | 1140     | 108.61473                          | 0.92217                            | 0.09613                            | 80.791625                           | 74.14                 | 2.98                   | 335.23   | 6.92  |   |
| 13                                                    | 1180     | 146.40996                          | 0.01804                            | 0.17581                            | 94.460362                           | 64.52                 | 0.37                   | 386.27   | 49.86 |   |
| YT6-3 Basalt, J=0.002521 ± 0.000006, Weight = 9.9 mg  |          |                                    |                                    |                                    |                                     |                       |                        |          |       |   |
| 1                                                     | 650      | 111.15001                          | 0.24672                            | 0.13326                            | 71.807032                           | 64.59                 | 6.26                   | 300.76   | 6.73  |   |
| 2                                                     | 700      | 415.12909                          | 0.42106                            | 1.19625                            | 61.824203                           | 14.87                 | 11.31                  | 261.83   | 55.44 |   |
| 3                                                     | 750      | 253.57399                          | 0.07625                            | 0.65016                            | 61.725978                           | 24.30                 | 5.61                   | 261.44   | 30.30 |   |
| 4                                                     | 800      | 77.74346                           | 0.46136                            | 0.04783                            | 63.67185                            | 81.87                 | 4.78                   | 269.10   | 3.46  |   |
| 5                                                     | 850      | 75.91913                           | 0.35287                            | 0.03806                            | 64.718366                           | 85.22                 | 4.46                   | 273.20   | 3.17  |   |
| 6                                                     | 900      | 76.6026                            | 0.40469                            | 0.04227                            | 64.166593                           | 83.74                 | 5.19                   | 271.04   | 3.26  |   |
| 7                                                     | 940      | 78.14302                           | 0.63646                            | 0.0506                             | 63.276624                           | 80.93                 | 6.26                   | 267.54   | 3.51  |   |
| 8                                                     | 980      | 72.88902                           | 0.82728                            | 0.03571                            | 62.445694                           | 85.61                 | 8.30                   | 264.28   | 3.03  |   |
| 9                                                     | 1020     | 71.23926                           | 0.96903                            | 0.03147                            | 62.067365                           | 87.05                 | 10.14                  | 262.79   | 2.92  |   |
| 10                                                    | 1060     | 71.85628                           | 0.40116                            | 0.03409                            | 61.96904                            | 86.14                 | 12.54                  | 262.40   | 2.95  |   |

|    |      |           |         |         |            |       |       |        |       |
|----|------|-----------|---------|---------|------------|-------|-------|--------|-------|
| 11 | 1100 | 77.2123   | 0.71999 | 0.04441 | 64.455028  | 83.28 | 15.94 | 272.17 | 3.30  |
| 12 | 1130 | 85.96362  | 0.13644 | 0.05679 | 69.898311  | 80.96 | 8.03  | 293.38 | 3.82  |
| 13 | 1170 | 120.02105 | 0.85688 | 0.12218 | 84.804489  | 70.31 | 1.12  | 350.23 | 6.61  |
| 14 | 1250 | 434.32932 | 0.71478 | 0.90277 | 170.643965 | 38.83 | 0.06  | 646.82 | 48.35 |

YM16 -3 Rhyolite,  $J=0.002521 \pm 0.000006$ , Weight = 11.4 mg

|    |      |           |         |         |           |       |       |        |       |
|----|------|-----------|---------|---------|-----------|-------|-------|--------|-------|
| 1  | 650  | 103.61966 | 0.00111 | 0.12642 | 66.264541 | 63.95 | 2.76  | 279.25 | 6.38  |
| 2  | 700  | 217.14637 | 0.00178 | 0.5267  | 61.507719 | 28.33 | 5.16  | 260.58 | 24.51 |
| 3  | 750  | 74.77844  | 0.0059  | 0.0394  | 63.137625 | 84.43 | 5.39  | 267.00 | 3.11  |
| 4  | 800  | 64.51632  | 0.00644 | 0.0069  | 62.476532 | 96.84 | 8.15  | 264.40 | 2.52  |
| 5  | 840  | 65.6605   | 0.00521 | 0.00887 | 63.039862 | 96.01 | 12.39 | 266.61 | 2.55  |
| 6  | 870  | 66.17097  | 0.00513 | 0.01245 | 62.491772 | 94.44 | 7.64  | 264.46 | 2.55  |
| 7  | 910  | 65.24072  | 0.00353 | 0.00781 | 62.933781 | 96.46 | 7.19  | 266.20 | 2.53  |
| 8  | 950  | 65.55341  | 0.00638 | 0.0079  | 63.220951 | 96.44 | 6.95  | 267.33 | 2.54  |
| 9  | 990  | 65.8339   | 0.00785 | 0.00819 | 63.414817 | 96.32 | 6.79  | 268.09 | 2.56  |
| 10 | 1030 | 66.26767  | 0.00959 | 0.00868 | 63.703304 | 96.13 | 6.98  | 269.22 | 2.59  |
| 11 | 1070 | 66.44149  | 0.01464 | 0.00927 | 63.702798 | 95.88 | 7.52  | 269.22 | 2.59  |
| 12 | 1100 | 68.08442  | 0.01368 | 0.01212 | 64.503745 | 94.74 | 5.75  | 272.36 | 2.63  |
| 13 | 1140 | 68.44456  | 0.0103  | 0.01277 | 64.673133 | 94.49 | 6.06  | 273.02 | 2.64  |
| 14 | 1180 | 71.64141  | 0.0013  | 0.01967 | 65.829333 | 91.89 | 4.68  | 277.55 | 2.77  |
| 15 | 1220 | 75.72225  | 0.00102 | 0.03094 | 66.578286 | 87.92 | 3.31  | 280.47 | 3.01  |
| 16 | 1320 | 88.63114  | 0.00786 | 0.06984 | 67.995125 | 76.72 | 2.29  | 285.99 | 4.20  |
| 17 | 1400 | 87.55155  | 0.01442 | 0.0565  | 70.856496 | 80.93 | 1.00  | 297.09 | 3.85  |

YM16 -3 Metamorphic diabase,  $J=0.002520 \pm 0.000006$ , Weight = 10.5 mg

|    |      |           |          |         |           |       |       |        |       |
|----|------|-----------|----------|---------|-----------|-------|-------|--------|-------|
| 1  | 650  | 193.7873  | 0.15254  | 0.48159 | 51.992794 | 26.73 | 1.77  | 220.40 | 23.38 |
| 2  | 700  | 760.96052 | 12.56595 | 2.39805 | 53.913481 | 7.01  | 5.37  | 228.05 | 68.01 |
| 3  | 750  | 268.68568 | 11.76105 | 0.73741 | 52.240746 | 19.25 | 5.83  | 221.39 | 34.94 |
| 4  | 800  | 84.53467  | 1.38043  | 0.08741 | 58.885125 | 69.58 | 5.84  | 247.70 | 4.73  |
| 5  | 850  | 77.04102  | 1.08347  | 0.05871 | 59.834796 | 77.59 | 6.33  | 251.43 | 3.65  |
| 6  | 900  | 75.0052   | 0.80561  | 0.0472  | 61.165558 | 81.49 | 9.53  | 256.64 | 3.28  |
| 7  | 950  | 74.24617  | 0.60663  | 0.04581 | 60.788296 | 81.83 | 12.90 | 255.16 | 3.25  |
| 8  | 990  | 66.14269  | 0.64681  | 0.02815 | 57.906837 | 87.50 | 14.44 | 243.85 | 2.68  |
| 9  | 1030 | 63.84075  | 0.8169   | 0.02569 | 56.353342 | 88.21 | 15.07 | 237.72 | 2.58  |
| 10 | 1060 | 67.18732  | 0.9955   | 0.03108 | 58.132914 | 86.45 | 9.02  | 244.74 | 2.76  |
| 11 | 1090 | 72.09747  | 1.17626  | 0.03909 | 60.70202  | 84.11 | 6.99  | 254.82 | 3.08  |
| 12 | 1170 | 80.60323  | 1.87544  | 0.06161 | 62.646466 | 77.60 | 6.13  | 262.42 | 3.83  |
| 13 | 1250 | 110.86902 | 2.93439  | 0.16323 | 63.027214 | 56.71 | 0.63  | 263.91 | 8.27  |
| 14 | 1330 | 144.69036 | 3.0181   | 0.26732 | 66.112818 | 45.58 | 0.15  | 275.89 | 18.52 |

Liu *et al.* (2012)

Sample: YG-2 and YG-14

| Incremental Heating                                                                                                                     |           | $^{36}\text{Ar(a)}$ | $^{38}\text{Ar(cl)}$ | $^{39}\text{Ar(k)}$ | $^{40}\text{Ar(r)}$ | Age $\pm$ 2s    | $^{40}\text{Ar(r)}$ | $^{39}\text{Ar(k)}$ |
|-----------------------------------------------------------------------------------------------------------------------------------------|-----------|---------------------|----------------------|---------------------|---------------------|-----------------|---------------------|---------------------|
| Steps                                                                                                                                   | Laser (%) | (V)                 | (V)                  | (V)                 | (V)                 | (Ma)            | (%)                 | (%)                 |
| <i>(a) YG-2 (whole rock); J=0.00360</i>                                                                                                 |           |                     |                      |                     |                     |                 |                     |                     |
| 10G2204D                                                                                                                                | 5         | 0.026               | 0.01                 | 9.132               | 455.61              | 298.1 $\pm$ 1.2 | 98.36               | 11.75               |
| 10G2204E                                                                                                                                | 5.4       | 0.012               | 0.009                | 9.362               | 458.827             | 293.2 $\pm$ 1.2 | 99.23               | 12.05               |
| 10G2204G                                                                                                                                | 5.8       | 0.005               | 0.007                | 8.231               | 398.553             | 290.0 $\pm$ 1.2 | 99.62               | 10.59               |
| 10G2204H                                                                                                                                | 6.2       | 0.002               | 0.005                | 6.041               | 292.708             | 290.1 $\pm$ 1.3 | 99.8                | 7.77                |
| 10G2204I                                                                                                                                | 6.8       | 0.001               | 0.006                | 5.812               | 279.134             | 287.8 $\pm$ 1.2 | 99.85               | 7.48                |
| 10G2204J                                                                                                                                | 7.5       | 0.004               | 0.013                | 10.208              | 487.209             | 286.1 $\pm$ 1.2 | 99.77               | 13.13               |
| 10G2204L                                                                                                                                | 8         | 0.005               | 0.008                | 6.644               | 315.596             | 284.9 $\pm$ 1.2 | 99.57               | 8.55                |
| 10G2204M                                                                                                                                | 9         | 0.003               | 0.007                | 4.607               | 217.984             | 283.8 $\pm$ 1.2 | 99.61               | 5.93                |
| 10G2204N                                                                                                                                | 10.5      | 0.003               | 0.007                | 5.456               | 254.749             | 280.4 $\pm$ 1.2 | 99.6                | 7.02                |
| 10G2204O                                                                                                                                | 12        | 0.004               | 0.003                | 2.897               | 136.955             | 283.6 $\pm$ 1.3 | 99.2                | 3.73                |
| 10G2204Q                                                                                                                                | 16        | 0.007               | 0.007                | 6.212               | 292.888             | 282.9 $\pm$ 1.2 | 99.33               | 7.99                |
| 10G2204R                                                                                                                                | 19        | 0.002               | 0.001                | 0.654               | 30.948              | 284.1 $\pm$ 4.3 | 98.51               | 0.84                |
| <i>T1=287.3<math>\pm</math>4.0 Ma; T2=286.7<math>\pm</math>2.7 Ma; T3=288.3<math>\pm</math>5.3 Ma; T4=281.5<math>\pm</math>5.0 Ma</i>   |           |                     |                      |                     |                     |                 |                     |                     |
| <i>(b) YG-14 (whole rock); J=0.00372</i>                                                                                                |           |                     |                      |                     |                     |                 |                     |                     |
| 10G2208D                                                                                                                                | 4.8       | 0.04                | 0.002                | 1.811               | 82.712              | 283.0 $\pm$ 6.3 | 87.46               | 1.8                 |
| 10G2208E                                                                                                                                | 5.1       | 0.031               | 0.003                | 2.578               | 120.115             | 288.3 $\pm$ 4.4 | 92.88               | 2.57                |
| 10G2208G                                                                                                                                | 5.5       | 0.024               | 0.004                | 6.572               | 309.229             | 290.9 $\pm$ 2.2 | 97.71               | 6.54                |
| 10G2208H                                                                                                                                | 5.8       | 0.02                | 0.003                | 5.007               | 233.623             | 288.6 $\pm$ 1.3 | 97.51               | 4.99                |
| 10G2208I                                                                                                                                | 6.3       | 0.014               | 0.008                | 9.291               | 443.546             | 294.8 $\pm$ 1.3 | 99.06               | 9.25                |
| 10G2208J                                                                                                                                | 6.7       | 0.007               | 0.011                | 11.361              | 536.335             | 291.8 $\pm$ 1.2 | 99.63               | 11.31               |
| 10G2208L                                                                                                                                | 7.2       | 0.003               | 0.009                | 8.144               | 379.489             | 288.3 $\pm$ 1.1 | 99.76               | 8.11                |
| 10G2208M                                                                                                                                | 7.8       | 0.005               | 0.01                 | 11.292              | 525.654             | 288.0 $\pm$ 1.1 | 99.72               | 11.25               |
| 10G2208N                                                                                                                                | 8.3       | 0.003               | 0.006                | 7.009               | 324.912             | 286.9 $\pm$ 1.2 | 99.75               | 6.98                |
| 10G2208O                                                                                                                                | 9         | 0.002               | 0.008                | 6.454               | 298.968             | 286.7 $\pm$ 1.2 | 99.82               | 6.43                |
| 10G2208Q                                                                                                                                | 10        | 0.005               | 0.006                | 5.745               | 265.124             | 285.7 $\pm$ 1.2 | 99.46               | 5.72                |
| 10G2208R                                                                                                                                | 12        | 0.004               | 0.005                | 4.511               | 208.036             | 285.5 $\pm$ 1.4 | 99.37               | 4.49                |
| 10G2208S                                                                                                                                | 16        | 0.011               | 0.015                | 13.539              | 624.99              | 285.8 $\pm$ 1.1 | 99.47               | 13.48               |
| 10G2208T                                                                                                                                | 20        | 0.008               | 0.005                | 4.168               | 191.069             | 283.9 $\pm$ 1.2 | 98.85               | 4.15                |
| 10G2208V                                                                                                                                | 26        | 0.003               | 0.001                | 1.49                | 68.735              | 285.6 $\pm$ 2.9 | 98.91               | 1.48                |
| <i>T1=287.9<math>\pm</math>3.1 Ma; T2=287.6<math>\pm</math>2.7 Ma; T3=287.4<math>\pm</math>3.1 Ma; T4=287.8<math>\pm</math>3.5 Ma</i>   |           |                     |                      |                     |                     |                 |                     |                     |
| T1: Weighted plateau age; T2: total fusion age; T3: isochron age; T4: inverse isochron age. All ages are given at the 2 $\sigma$ level. |           |                     |                      |                     |                     |                 |                     |                     |

Wei et al. (2014)

## Reference

- Chen, H.L., Yang, S.F., Dong, C.W., Zu, G.Q., Jia, C.Z., Wei, G.Q. & Wang, Z.G. 1997. Geological thermal events in Tarim Basin. *Chinese Science Bulletin*, 42(7), 580-584.
- Liu, Y.L., Hu, X.F., Huang, Z.B., Wu, G.Y., Zheng, D.M., Shen, Y.M., Zhao, Y. & Liu, Y.J. 2012.  $^{40}\text{Ar}$ - $^{39}\text{Ar}$  geochronology and geochemistry of the volcanic rocks from the west segment of Tabei uplift, Tarim Basin. *Acta Petrological Sinica*, 28(8), 2423-2434. (in Chinese with English abstract).
- Wei, X., Xu, Y.G., Feng, Y.X. & Zhao, J.X. 2014. Plume–lithosphere interaction in the generation of the Tarim large igneous province, NW China: geochronological and geochemical constraints. *American Journal of Science*, 314, 314–356.
- Yang, S.F., Chen, H.L., Dong, C.W., Jia, C.Z. & Wang, Z.G. 1996. The discovery of Permian syenite inside Tarim Basin and its geodynamic significance. *Geochimica*, 25(2), 121-128. (in Chinese with English abstract).
- Yang, S.F., Li, Z.L., Chen, H.L., Chen, W. & Yu, X. 2006.  $^{40}\text{Ar}/^{39}\text{Ar}$  dating of basalts from Tarim Basin, NW China and its implication to a Permian thermal tectonic event. *Journal of Zhejiang University - Science A* 7 (Supp. II), 170–174.
- Zhang, H.A., Li, Y.J., Wu, G.Y., Su, W., Qian, Y.X., Meng, Q.L., Cai, X.Y., Han, L.J., Zhao, Y. & Liu, Y.L. 2009. Isotopic geochronology of Permian igneous rocks in the Tarim Basin. *Chinese Journal of Geology*, 44 (1), 137–158. (in Chinese with English abstract).
- Zhang, Y.T., Liu, J.Q. & Guo, Z.F. 2010. Permian basaltic rocks in the Tarim basin, NW China: implications for plume–lithosphere interaction. *Gondwana Research*, 18, 596–610.
- Zhou, L.X., Hu, S.L., Wang, L.G., Li, Y.J., Huang, Z.B., Zhu, H.Y., Zhao, Y. & Liu, Y.L. 2010. The age of Piqiang gabbroid, NW margin of Tarim Basin, NW China. *Chinese Journal of Geology*, 45(5), 1057-1065. (in Chinese with English abstract)
