# Supplementary material
Source: publisher figshare collection journal article supplement (https://geolsoc.figshare.com/articles/dataset/_/3454061)
Supplement: Supplementary file 5 [file 1]

## Kimberlite geochemistry

| Sample                          | W10-51 <sup>a</sup> | W10-11 <sup>a</sup> | W10-12 <sup>a</sup> | W10-22 <sup>a</sup> | W10-52 <sup>a</sup> | wjl5-7b <sup>b</sup> |
|---------------------------------|---------------------|---------------------|---------------------|---------------------|---------------------|----------------------|
| SiO <sub>2</sub>                | 39.84               | 35.19               | 34.66               | 31.82               | 34.35               | 31.25                |
| TiO <sub>2</sub>                | 1.48                | 2.15                | 2.37                | 1.75                | 2.04                | 2.09                 |
| Al <sub>2</sub> O <sub>3</sub>  | 3.18                | 4.48                | 4.29                | 3.41                | 4.21                | 4.32                 |
| TFe <sub>2</sub> O <sub>3</sub> | 10.8                | 14.85               | 15.82               | 15.72               | 13.86               | 12.8                 |
| MnO                             | 0.14                | 0.19                | 0.2                 | 0.21                | 0.18                | 0.2                  |
| MgO                             | 15.63               | 16.52               | 18.78               | 21.52               | 20.82               | 16.69                |
| CaO                             | 19.51               | 13.13               | 11.09               | 14.35               | 12.55               | 18.93                |
| Na <sub>2</sub> O               | 1.47                | 1.09                | 1.01                | 0.1                 | 1.06                | 1.32                 |
| K <sub>2</sub> O                | 0.42                | 0.69                | 0.73                | 1.09                | 0.69                | 1.26                 |
| P <sub>2</sub> O <sub>5</sub>   | 0.97                | 2.09                | 1.98                | 1.95                | 1.82                | 2.65                 |
| LOI                             | 6.68                | 8.82                | 8.24                | 7.18                | 8.81                | 7.87                 |
| Total                           | 100.12              | 99.2                | 99.17               | 99.1                | 100.39              | 99.38                |
| TFeO                            | 9.71                | 13.36               | 14.23               | 14.14               | 12.47               | 11.52                |
| Mg#                             | 0.74                | 0.69                | 0.7                 | 0.73                | 0.75                | 0.72                 |
| La                              | 130.2               | 306.1               | 328.5               | 203.5               | 187.2               | 212                  |
| Ce                              | 257                 | 601.8               | 667.7               | 441.2               | 355.6               | 449.4                |
| Pr                              | 33.68               | 70.74               | 80.74               | 56.65               | 52.58               | 59.22                |
| Nd                              | 139                 | 282.9               | 321.1               | 190.3               | 207.8               | 228.9                |
| Sm                              | 29.3                | 49.04               | 45.13               | 29.76               | 31.36               | 39.64                |
| Eu                              | 9.13                | 18.12               | 18.73               | 11.46               | 11.86               | 11.14                |
| Gd                              | 27.65               | 48.92               | 38.53               | 31.59               | 31.68               | 32.41                |
| Tb                              | 3.64                | 4.69                | 5.23                | 3.5                 | 3.62                | 3.97                 |
| Dy                              | 16.96               | 21.03               | 26.19               | 16.99               | 15.45               | 17.53                |
| Ho                              | 3.41                | 4.47                | 5.11                | 3.26                | 3.176               | 2.77                 |
| Er                              | 9.1                 | 10.4                | 11.64               | 8.15                | 8.041               | 5.97                 |
| Tm                              | 1.06                | 1.29                | 1.26                | 0.921               | 0.936               | 0.65                 |
| Yb                              | 4.09                | 5.34                | 4.49                | 3.56                | 4.05                | 3.32                 |

|                      |       |       |       |       |       |       |
|----------------------|-------|-------|-------|-------|-------|-------|
| Lu                   | 0.462 | 0.575 | 0.593 | 0.392 | 0.425 | 0.42  |
| Y                    | 64.62 | 83.22 | 94.11 | 70.82 | 71.74 | 62.83 |
| Sr                   | 1191  | 1134  | 1413  | 1143  | 1705  | 1676  |
| Rb                   | 8.92  | 14.18 | 44.71 | 26.22 | 1.92  | 30.05 |
| Zr                   | 543.8 | 438.2 | 500.1 | 401   | 538.6 | 412.5 |
| Nb                   | 101.6 | 149.1 | 178.6 | 143.1 | 157   | 123.6 |
| Ba                   | 782.9 | 3733  | 4545  | 2050  | 902.5 | 3523  |
| Hf                   | 7.68  | 7.99  | 9     | 6.04  | 8.37  | 9.08  |
| Ta                   | 3.88  | 5.52  | 6.17  | 4.32  | 5.8   | 7.28  |
| Pb                   | n.d.  | n.d.  | n.d.  | n.d.  | n.d.  | 21.42 |
| Th                   | 16.88 | 50.91 | 55.23 | 33.81 | 23.79 | 23.57 |
| U                    | 3.55  | 9.32  | 8.76  | 6.47  | 7.29  | 7.68  |
| (La/Yb) <sub>N</sub> | 30.21 | 57.06 | 59.36 | 55.63 | 47.2  | 54.1  |

Total Fe<sub>2</sub>O<sub>3</sub> as TFe<sub>2</sub>O<sub>3</sub>; TFeO= 0.8998×TFe<sub>2</sub>O<sub>3</sub>. Mg<sup>#</sup>=molar Mg/(Mg+TFe<sup>2+</sup>). n.d.=not detected. N=chondrite normalized; Data are from [Jiang et al. \(2004\)<sup>a</sup>](#) and [Li et al. \(2010\)<sup>b</sup>](#), respectively.

## Syenite geochemistry

|                                               | 05BH-2 <sup>a</sup> | 05BH-3 <sup>a</sup> | 05BH-5 <sup>a</sup> | XH-4 <sup>b</sup> | XH-9 <sup>b</sup> | XH-12 <sup>b</sup> | XH-14 <sup>b</sup> | XH-16 <sup>b</sup> | XH-34 <sup>b</sup> | XH-35 <sup>b</sup> | XH-36 <sup>b</sup> | XH-37 <sup>b</sup> | 04XJ-73 <sup>c</sup> | 04XJ-75 <sup>c</sup> | 04XJ-77 <sup>c</sup> | 04XJ-79 <sup>c</sup> | 04XJ-82 <sup>c</sup> | 04XJ-84 <sup>c</sup> | 04XJ-86 <sup>c</sup> | 04XJ-88 <sup>c</sup> | XHZ-1b <sup>d</sup> | XHZ-3-1 <sup>d</sup> | XHZ-4 <sup>d</sup> | XHZ-5A <sup>d</sup> | XHZ-6 <sup>d</sup> | XHZ-1A <sup>d</sup> | XHZ-9 <sup>d</sup> | XHZ-10 <sup>d</sup> |
|-----------------------------------------------|---------------------|---------------------|---------------------|-------------------|-------------------|--------------------|--------------------|--------------------|--------------------|--------------------|--------------------|--------------------|----------------------|----------------------|----------------------|----------------------|----------------------|----------------------|----------------------|----------------------|---------------------|----------------------|--------------------|---------------------|--------------------|---------------------|--------------------|---------------------|
| SiO <sub>2</sub>                              | 68.70               | 68.48               | 67.87               | 63.75             | 60.89             | 61.24              | 61.52              | 60.32              | 63.86              | 61.03              | 69.07              | 67.33              | 64.15                | 67.29                | 65.28                | 65.14                | 62.98                | 65.48                | 65.42                | 65.14                | 60.90               | 62.02                | 61.82              | 61.48               | 62.02              | 58.59               | 62.89              | 60.02               |
| TiO <sub>2</sub>                              | 0.08                | 0.11                | 0.34                | 0.49              | 0.67              | 0.74               | 0.74               | 0.96               | 0.51               | 0.83               | 0.29               | 0.27               | 0.70                 | 0.40                 | 0.54                 | 0.56                 | 0.77                 | 0.47                 | 0.52                 | 0.54                 | 0.91                | 0.89                 | 0.96               | 1.02                | 0.83               | 1.42                | 0.64               | 1.17                |
| Al <sub>2</sub> O <sub>3</sub>                | 17.10               | 17.11               | 14.49               | 16.90             | 18.41             | 17.69              | 16.84              | 16.81              | 17.01              | 17.10              | 13.85              | 15.47              | 16.85                | 16.79                | 17.13                | 16.90                | 18.22                | 17.61                | 17.03                | 17.28                | 16.29               | 16.71                | 16.40              | 16.47               | 16.69              | 16.98               | 18.97              | 17.90               |
| Fe <sub>2</sub> O <sub>3</sub> <sup>III</sup> | 2.05                | 2.05                | 5.13                | 3.24              | 3.64              | 3.95               | 4.72               | 5.19               | 3.60               | 4.94               | 3.97               | 2.62               | 4.35                 | 3.32                 | 3.41                 | 3.81                 | 3.65                 | 2.85                 | 3.35                 | 3.36                 | 7.01                | 6.65                 | 7.25               | 7.28                | 6.28               | 6.91                | 2.90               | 5.42                |
| CaO                                           | 0.28                | 0.08                | 0.77                | 1.72              | 2.98              | 2.84               | 2.71               | 3.18               | 1.56               | 3.03               | 0.74               | 1.17               | 2.02                 | 0.54                 | 1.46                 | 1.64                 | 2.78                 | 1.47                 | 1.51                 | 1.88                 | 2.73                | 2.58                 | 2.73               | 2.72                | 2.49               | 4.11                | 2.30               | 3.81                |
| MgO                                           | 0.01                | 0.01                | 0.16                | 0.41              | 0.85              | 0.79               | 1.36               | 1.41               | 0.41               | 0.85               | 0.00               | 0.00               | 0.67                 | 0.08                 | 0.38                 | 0.43                 | 0.69                 | 0.30                 | 0.37                 | 0.39                 | 0.83                | 0.66                 | 0.69               | 0.72                | 0.62               | 2.01                | 0.73               | 1.56                |
| K <sub>2</sub> O                              | 5.71                | 5.66                | 4.79                | 5.21              | 3.78              | 3.70               | 3.57               | 3.59               | 4.47               | 3.53               | 4.78               | 5.81               | 4.40                 | 5.80                 | 5.21                 | 5.02                 | 4.26                 | 5.39                 | 5.44                 | 4.84                 | 3.52                | 3.52                 | 3.56               | 3.51                | 3.63               | 3.56                | 4.07               | 3.47                |
| Na <sub>2</sub> O                             | 6.08                | 6.30                | 5.41                | 6.58              | 6.78              | 6.88               | 6.38               | 6.48               | 6.98               | 6.58               | 5.89               | 5.61               | 6.08                 | 5.15                 | 5.82                 | 5.74                 | 5.82                 | 5.83                 | 5.70                 | 5.80                 | 6.86                | 6.05                 | 5.66               | 5.82                | 6.27               | 5.21                | 6.61               | 5.54                |
| MnO                                           | 0.01                | 0.10                | 0.17                | 0.11              | 0.10              | 0.10               | 0.14               | 0.14               | 0.10               | 0.14               | 0.14               | 0.15               | 0.15                 | 0.04                 | 0.12                 | 0.11                 | 0.09                 | 0.08                 | 0.11                 | 0.12                 | 0.23                | 0.21                 | 0.23               | 0.24                | 0.21               | 0.14                | 0.05               | 0.09                |
| P <sub>2</sub> O <sub>5</sub>                 | 0.01                | 0.02                | 0.03                | 0.10              | 0.18              | 0.22               | 0.27               | 0.36               | 0.13               | 0.31               | 0.00               | 0.00               | 0.19                 | 0.06                 | 0.11                 | 0.11                 | 0.18                 | 0.08                 | 0.09                 | 0.09                 | 0.22                | 0.19                 | 0.21               | 0.22                | 0.19               | 0.44                | 0.11               | 0.34                |
| LOI                                           | 0.39                | 0.33                | 0.46                | 1.23              | 1.23              | 1.11               | 0.77               | 0.67               | 0.67               | 0.80               | 0.69               | 1.06               | 0.60                 | 0.85                 | 0.94                 | 0.99                 | 1.48                 | 0.95                 | 1.11                 | 1.35                 | 0.21                | 0.24                 | 0.21               | 0.23                | 0.50               | 0.34                | 0.64               | 0.40                |
| Total                                         | 100.42              | 100.25              | 99.64               | 99.97             | 99.69             | 99.46              | 99.26              | 99.38              | 99.48              | 99.40              | 99.61              | 99.77              | 99.72                | 99.84                | 99.65                | 99.65                | 99.61                | 99.74                | 99.72                | 99.62                | 99.71               | 99.73                | 99.72              | 99.71               | 99.72              | 99.69               | 99.91              | 99.72               |

Data are from Zhang *et al.* (2008)<sup>a</sup>, Yang *et al.* (1996)<sup>b</sup>, Sun *et al.* (2008)<sup>c</sup> and Wei & Xu (2011)<sup>d</sup>.

## Granite pluton geochemistry

|                                | Halajun 1 pluton |          |          |          |          |          |          | Halajun 2 pluton |          |          |          |          |          |          |          |
|--------------------------------|------------------|----------|----------|----------|----------|----------|----------|------------------|----------|----------|----------|----------|----------|----------|----------|
| sample                         | 08KT02-1         | 08KT02-2 | 08KT02-3 | 08KT02-4 | 08KT02-5 | 08KT02-6 | 08KT02-7 | 08KT03-1         | 08KT03-2 | 08KT03-3 | 08KT03-4 | 08KT03-5 | 08KT03-6 | 08KT03-7 | 08KT03-8 |
| Major elements (%)             |                  |          |          |          |          |          |          |                  |          |          |          |          |          |          |          |
| SiO <sub>2</sub>               | 71.86            | 71.7     | 73.22    | 74.24    | 72.89    | 72.7     | 75.23    | 77.67            | 77.88    | 77.81    | 76.76    | 77.99    | 77.24    | 78.22    | 77.02    |
| Al <sub>2</sub> O <sub>3</sub> | 14.6             | 14.7     | 14.44    | 13.36    | 13.16    | 13.94    | 12.02    | 12.07            | 12.09    | 12.04    | 12.17    | 12.18    | 12.01    | 12       | 12.42    |
| CaO                            | 1.2              | 1.14     | 1        | 0.96     | 0.89     | 1.01     | 1.15     | 0.53             | 0.59     | 0.52     | 0.57     | 0.47     | 0.52     | 0.49     | 0.53     |
| Fe <sub>2</sub> O <sub>3</sub> | 1.91             | 1.74     | 1.47     | 1.76     | 1.62     | 1.75     | 2.73     | 0.42             | 0.26     | 0.4      | 1.15     | 0.49     | 0.77     | 0.21     | 0.7      |
| K <sub>2</sub> O               | 5.3              | 5.72     | 5.35     | 5.19     | 5.25     | 5.83     | 4.56     | 4.85             | 4.72     | 4.88     | 4.83     | 4.59     | 4.86     | 4.7      | 5        |
| MgO                            | 0.15             | 0.14     | 0.15     | 0.15     | 0.15     | 0.15     | 0.18     | 0.05             | 0.05     | 0.08     | 0.07     | 0.08     | 0.05     | 0.07     | 0.07     |
| MnO                            | 0.03             | 0.03     | 0.03     | 0.03     | 0.03     | 0.03     | 0.05     | 0.01             | 0.01     | 0.01     | 0.01     | 0.01     | 0.02     | 0.01     | 0.01     |
| Na <sub>2</sub> O              | 4.33             | 4.15     | 3.73     | 3.64     | 3.44     | 3.86     | 3.4      | 3.73             | 3.79     | 3.6      | 3.76     | 3.5      | 3.7      | 3.61     | 3.58     |
| P <sub>2</sub> O <sub>5</sub>  | 0.02             | 0.02     | 0.02     | 0.03     | 0.02     | 0.02     | 0.04     | 0.01             | 0        | 0        | 0        | 0        | 0        | 0.01     | 0        |
| TiO <sub>2</sub>               | 0.19             | 0.17     | 0.16     | 0.19     | 0.17     | 0.17     | 0.28     | 0.04             | 0.04     | 0.05     | 0.06     | 0.05     | 0.05     | 0.03     | 0.04     |
| LOI                            | 0.15             | 0.21     | 0.21     | 0.24     | 2.2      | 0.29     | 0.2      | 0.42             | 0.38     | 0.43     | 0.43     | 0.46     | 0.58     | 0.48     | 0.45     |
| Σ                              | 99.74            | 99.73    | 99.76    | 99.79    | 99.82    | 99.75    | 99.83    | 99.81            | 99.81    | 99.81    | 99.81    | 99.84    | 99.8     | 99.82    | 99.81    |
| Trace elements (ppm)           |                  |          |          |          |          |          |          |                  |          |          |          |          |          |          |          |
| La                             | 48.11            | 86.2     | 96.2     | 108      | 42.6     | 52.4     | 78.4     | 56               | 64.7     | 61.7     | 65.5     | 53.1     | 64.9     | 49.6     | 59       |
| Ce                             | 103.7            | 176      | 194      | 211      | 102      | 108      | 174      | 115              | 137      | 130      | 141      | 113      | 140      | 104      | 127      |
| Pr                             | 13.57            | 21.2     | 22.8     | 24.5     | 11.8     | 13.5     | 22.2     | 14.1             | 16.7     | 15.7     | 17.6     | 14.1     | 16.9     | 13.3     | 15.5     |
| Nd                             | 54.6             | 77.1     | 80.8     | 85.7     | 45.4     | 52.5     | 85.4     | 48.9             | 58.5     | 54.9     | 64.3     | 50.4     | 60.6     | 48.2     | 55.3     |
| Sm                             | 11.3             | 13.3     | 13       | 14.3     | 9.17     | 11.8     | 16.7     | 10.3             | 12.5     | 11.7     | 15.4     | 11.2     | 13.2     | 10.9     | 12.2     |
| Eu                             | 1.52             | 1.68     | 1.63     | 1.49     | 1.32     | 1.34     | 1.27     | 0.04             | 0.04     | 0.05     | 0.05     | 0.04     | 0.05     | 0.04     | 0.05     |
| Gd                             | 10.6             | 11.3     | 10.9     | 12.3     | 8.63     | 11.5     | 15       | 9.78             | 12.7     | 11.4     | 15.4     | 10.6     | 12.8     | 10.8     | 12.5     |
| Tb                             | 1.81             | 1.78     | 1.64     | 1.94     | 1.52     | 2.11     | 2.592    | 1.89             | 2.42     | 2.19     | 3.09     | 2.04     | 2.48     | 2.09     | 2.41     |
| Dy                             | 10.14            | 9.76     | 8.64     | 10.4     | 8.72     | 12.1     | 14.4     | 11.5             | 14.2     | 12.8     | 18.8     | 12       | 14.5     | 12.3     | 14.4     |

|    |      |      |      |      |      |      |      |      |      |      |      |      |       |      |      |
|----|------|------|------|------|------|------|------|------|------|------|------|------|-------|------|------|
| Ho | 1.88 | 1.84 | 1.59 | 1.99 | 1.68 | 2.27 | 2.78 | 2.31 | 2.86 | 2.49 | 3.81 | 2.41 | 2.94  | 2.44 | 2.82 |
| Er | 5.19 | 4.91 | 4.35 | 5.62 | 4.81 | 6.08 | 7.72 | 7.18 | 8.38 | 7.4  | 11.5 | 7.15 | 8.75  | 7.22 | 8.34 |
| Tm | 0.78 | 0.75 | 0.65 | 0.89 | 0.75 | 0.95 | 1.19 | 1.27 | 1.38 | 1.23 | 1.89 | 1.24 | 1.49  | 1.2  | 1.38 |
| Yb | 4.86 | 4.59 | 4.13 | 5.54 | 4.78 | 5.81 | 7.5  | 8.82 | 8.93 | 7.78 | 11.9 | 8.04 | 9.88  | 7.94 | 8.85 |
| Lu | 0.74 | 0.71 | 0.65 | 0.87 | 0.75 | 0.99 | 1.17 | 1.4  | 1.38 | 1.19 | 1.83 | 1.28 | 1.5   | 1.26 | 1.38 |
| Rb | 170  | 190  | 183  | 177  | 197  | 207  | 151  | 447  | 441  | 412  | 456  | 416  | 456   | 443  | 470  |
| Ga | 31.1 | 30.1 | 28   | 29.3 | 27.2 | 28.7 | 25.9 | 29.5 | 30.1 | 27.9 | 30   | 28.4 | 29.71 | 29.2 | 29.5 |
| V  | 2.98 | 2.43 | 3.16 | 4.27 | 3.01 | 2.33 | 4.39 | 2.45 | 1.97 | 3.11 | 1.35 | 1.72 | 1.74  | 1.6  | 1.86 |
| Cr | 0.05 | 0.03 | 0.64 | 0.45 | 0.12 | 0.09 | 0.05 | 0.15 | 0.74 | 0.62 | 1.49 | 0.63 | 0.11  | 4.17 | 0.29 |
| Ni | 1.21 | 0.73 | 1.64 | 0.82 | 0.89 | 0.18 | 0.73 | 0.54 | 0.22 | 0.01 | 1.21 | 1.55 | 1.66  | 4.75 | 1.37 |
| Sr | 88.7 | 97.8 | 93.5 | 87.6 | 77.9 | 80.4 | 75.9 | 6.23 | 8.59 | 7.31 | 7.34 | 7.49 | 5.15  | 7.84 | 6.29 |
| Ba | 460  | 551  | 546  | 484  | 465  | 466  | 364  | 9.91 | 10.5 | 10.8 | 9.53 | 12.2 | 8.22  | 9.63 | 10.8 |
| Th | 17.6 | 20.6 | 20.3 | 26.6 | 17.1 | 12.8 | 27.4 | 41.1 | 41.7 | 40.1 | 53.9 | 41.8 | 44    | 45   | 42.9 |
| U  | 2.83 | 2.35 | 2.44 | 3.98 | 3.46 | 5.64 | 3.8  | 5.9  | 9.32 | 7.32 | 7.62 | 9.94 | 7.79  | 9.34 | 5.97 |
| Ta | 3.04 | 3.17 | 2.93 | 4.07 | 3.81 | 4.51 | 4.71 | 6.99 | 9.17 | 7.81 | 8.34 | 9.74 | 8.76  | 8.85 | 7.67 |
| Nb | 44.7 | 44.2 | 40.7 | 52.6 | 50.2 | 59.1 | 69.3 | 82.4 | 115  | 97.5 | 143  | 116  | 105   | 108  | 92.1 |
| Zr | 367  | 183  | 243  | 314  | 266  | 172  | 367  | 234  | 164  | 176  | 202  | 206  | 210   | 178  | 172  |
| Hf | 10.6 | 5.61 | 7.22 | 9.81 | 8.1  | 5.5  | 11.9 | 13.1 | 9.51 | 9    | 11.1 | 11.3 | 12    | 10.3 | 9.16 |
| Y  | 52.8 | 50.5 | 45.2 | 56.4 | 48.6 | 61.9 | 76.7 | 77.9 | 91.2 | 77.4 | 121  | 73.9 | 91.5  | 78.4 | 90.7 |

Zhang et al. (2010)

|                                | Guerlale pluton |        |        |        |        |        |        |        |        |        |        |        |        |        |
|--------------------------------|-----------------|--------|--------|--------|--------|--------|--------|--------|--------|--------|--------|--------|--------|--------|
| sample                         | 09GL01          | 09GL02 | 09GL05 | 09GL06 | 09GL07 | 09GL08 | 09GL09 | 09GL10 | 09GL12 | 09GL13 | 09GL15 | 09GL16 | 09GL17 | 09GL18 |
| Major elements (%)             |                 |        |        |        |        |        |        |        |        |        |        |        |        |        |
| SiO <sub>2</sub>               | 77.77           | 73.49  | 75.25  | 65.97  | 76.75  | 76.46  | 74.07  | 75.82  | 73.66  | 73.85  | 74.3   | 74.05  | 74.11  | 73.81  |
| Al <sub>2</sub> O <sub>3</sub> | 11.55           | 13.35  | 12.61  | 16.8   | 11.94  | 12.41  | 12.8   | 12.22  | 12.71  | 12.82  | 12.83  | 12.82  | 12.73  | 12.6   |
| CaO                            | 0.25            | 0.86   | 0.64   | 1.08   | 0.46   | 0.17   | 0.66   | 0.52   | 0.73   | 1      | 0.83   | 0.93   | 0.68   | 0.94   |
| Fe <sub>2</sub> O <sub>3</sub> | 1.2             | 1.85   | 1.63   | 3.29   | 1.36   | 0.99   | 1.8    | 1.4    | 1.96   | 2.19   | 1.76   | 1.86   | 1.97   | 2.14   |
| K <sub>2</sub> O               | 4.43            | 5.44   | 5.3    | 5.45   | 4.84   | 5.1    | 5.63   | 5.17   | 5.43   | 4.94   | 5.24   | 5.2    | 5.49   | 5.17   |

|                               |       |       |       |       |       |       |       |       |        |        |        |        |        |        |
|-------------------------------|-------|-------|-------|-------|-------|-------|-------|-------|--------|--------|--------|--------|--------|--------|
| MgO                           | 0.07  | 0.26  | 0.21  | 0.17  | 0.1   | 0.14  | 0.25  | 0.1   | 0.28   | 0.25   | 0.31   | 0.29   | 0.32   | 0.27   |
| MnO                           | 0.01  | 0.03  | 0.02  | 0.08  | 0.01  | 0.02  | 0.02  | 0.02  | 0.03   | 0.02   | 0.05   | 0.02   | 0.05   | 0.02   |
| Na <sub>2</sub> O             | 3.35  | 3.4   | 3.11  | 5.88  | 3.34  | 3.4   | 3.32  | 3.51  | 3.21   | 3.17   | 3.41   | 3.38   | 3.2    | 3.4    |
| P <sub>2</sub> O <sub>5</sub> | 0.03  | 0.05  | 0.04  | 0.06  | 0.04  | 0.02  | 0.06  | 0.04  | 0.032  | 0.031  | 0.028  | 0.028  | 0.029  | 0.029  |
| TiO <sub>2</sub>              | 0.11  | 0.24  | 0.2   | 0.23  | 0.12  | 0.1   | 0.24  | 0.12  | 0.2    | 0.2    | 0.2    | 0.19   | 0.19   | 0.19   |
| LOI                           | 0.64  | 0.41  | 0.38  | 0.38  | 0.43  | 0.61  | 0.53  | 0.47  | 1.57   | 1.31   | 0.86   | 1.04   | 1.05   | 1.24   |
| Total                         | 99.39 | 99.38 | 99.38 | 99.37 | 99.39 | 99.42 | 99.37 | 99.38 | 99.812 | 99.781 | 99.818 | 99.808 | 99.819 | 99.809 |
| Trace elements (ppm)          |       |       |       |       |       |       |       |       |        |        |        |        |        |        |
| Sc                            | 0.864 | 1.998 | 1.65  | 0.327 | 2.369 | 1.028 | 1.845 | 1.276 | 0.36   | 0.68   | 0.63   | 1.25   | 0.98   | 1.55   |
| V                             | 6.208 | 9.858 | 6.576 | 4.727 | 5.943 | 4.171 | 7.94  | 3.707 | 7.28   | 6.21   | 6.56   | 6.92   | 8.14   | 7.33   |
| Cr                            | 1.471 | 2.463 | 2.119 | 4.85  | 2.548 | 1.571 | 3.347 | 3.011 | 0.51   | 0.07   | 0.3    | 0.91   | 0.65   | 2.69   |
| Co                            | 16.66 | 19.68 | 23.59 | 23.9  | 19.04 | 17.45 | 20.77 | 19.45 | 2.08   | 0.63   | 1.99   | 1.25   | 1.13   | 1.14   |
| Ni                            | 1.198 | 1.537 | 1.562 | 4.593 | 1.145 | 1.01  | 1.522 | 1.413 | 2.44   | 0.03   | 0.44   | 0.13   | 1.37   | 1.01   |
| Cu                            | 1.781 | 4.406 | 7.456 | 1.397 | 1.906 | 3.11  | 2.366 | 3.462 | 3.86   | 2.93   | 2.79   | 2.12   | 2.82   | 3.51   |
| Zn                            | 36.48 | 45.67 | 32.78 | 33.77 | 67.34 | 54.62 | 38.82 | 59.38 | 43.56  | 36.79  | 73.85  | 69.42  | 86.35  | 35.04  |
| Ga                            | 25.28 | 20.14 | 18.59 | 28.34 | 27.81 | 27.86 | 18.86 | 29.56 | 22.78  | 24.62  | 23.19  | 23.39  | 24.54  | 23.99  |
| Ge                            | 1.94  | 1.761 | 1.745 | 2.073 | 1.607 | 2.1   | 1.586 | 1.95  | 1.89   | 2.23   | 2.19   | 1.99   | 2.13   | 2.39   |
| Rb                            | 188.2 | 283   | 300.3 | 319.9 | 130.3 | 253.6 | 287.4 | 263.4 | 371    | 367.7  | 339.5  | 350.5  | 382.9  | 379.4  |
| Sr                            | 24.02 | 72.8  | 40.89 | 22.49 | 56.92 | 23.55 | 61.49 | 26.78 | 50.04  | 45.57  | 49.4   | 50.18  | 53.48  | 39.54  |
| Y                             | 46.78 | 31.67 | 27.14 | 45.88 | 28.11 | 54.52 | 29.07 | 54.26 | 48     | 49.76  | 46.31  | 42.93  | 48.38  | 49.17  |
| Zr                            | 156.9 | 259.7 | 195.6 | 122.9 | 613.8 | 186.7 | 321.4 | 186.6 | 248    | 227.2  | 244.9  | 205.5  | 242.2  | 249.1  |
| Nb                            | 42.41 | 34.74 | 42.32 | 41.26 | 66.7  | 46.74 | 37.97 | 46.53 | 42.38  | 45.43  | 45.17  | 48.1   | 48.93  | 49.41  |
| Cs                            | 4.301 | 9.378 | 6.148 | 4.1   | 2.566 | 5.69  | 9.19  | 5.862 | 8.56   | 8.56   | 12.1   | 11.78  | 12.59  | 5.29   |
| Ba                            | 94.26 | 322.2 | 195.4 | 87.83 | 529.3 | 81.33 | 262   | 95.19 | 3368   | 338    | 339.6  | 317.4  | 344.2  | 296.9  |
| La                            | 57.27 | 66.29 | 51.93 | 60.24 | 65.1  | 68.61 | 49.14 | 77.47 | 58.39  | 139.2  | 70.14  | 102.6  | 77.61  | 79.45  |
| Ce                            | 112   | 118   | 93.13 | 123.8 | 114.1 | 137.8 | 86    | 155.1 | 103    | 263.6  | 123.3  | 179    | 138    | 139.5  |
| Pr                            | 12.95 | 12.02 | 9.51  | 14.1  | 12.34 | 15.67 | 9.112 | 17.56 | 11.13  | 26.94  | 13.37  | 18.92  | 14.74  | 15.2   |
| Nd                            | 44    | 37.53 | 29.52 | 48.05 | 39.91 | 53.09 | 29.43 | 60.82 | 37.79  | 82.52  | 42.98  | 55.74  | 47.83  | 47.44  |
| Sm                            | 8.405 | 5.926 | 4.572 | 9.239 | 6.062 | 9.998 | 5.017 | 11.24 | 8.06   | 11.96  | 7.69   | 8.41   | 8.31   | 8.13   |

|    |       |       |       |       |       |       |       |       |       |       |       |       |       |       |
|----|-------|-------|-------|-------|-------|-------|-------|-------|-------|-------|-------|-------|-------|-------|
| Eu | 0.289 | 0.496 | 0.345 | 0.247 | 1.031 | 0.264 | 0.393 | 0.315 | 0.57  | 0.7   | 0.59  | 0.61  | 0.62  | 0.54  |
| Gd | 7.963 | 5.295 | 4.157 | 8.494 | 5.522 | 9.348 | 4.874 | 10.38 | 8.1   | 9.25  | 7.2   | 7.01  | 7.59  | 7.38  |
| Tb | 1.472 | 0.886 | 0.734 | 1.534 | 0.875 | 1.692 | 0.828 | 1.842 | 1.45  | 1.47  | 1.24  | 1.19  | 1.33  | 1.35  |
| Dy | 9.046 | 5.314 | 4.493 | 9.117 | 5.371 | 10.15 | 5.024 | 10.53 | 8.9   | 8.63  | 7.76  | 7.26  | 8.25  | 8.38  |
| Ho | 1.787 | 1.086 | 0.972 | 1.8   | 1.096 | 2.012 | 1.064 | 2.014 | 1.92  | 1.82  | 1.69  | 1.62  | 1.8   | 1.9   |
| Er | 5.012 | 3.296 | 2.977 | 5.024 | 3.118 | 5.557 | 3.264 | 5.657 | 5.72  | 5.36  | 5.17  | 4.76  | 5.37  | 5.7   |
| Tm | 0.72  | 0.519 | 0.472 | 0.767 | 0.485 | 0.807 | 0.517 | 0.796 | 0.94  | 0.86  | 0.84  | 0.76  | 0.91  | 0.92  |
| Yb | 4.725 | 3.781 | 3.457 | 4.959 | 3.338 | 5.13  | 3.636 | 5.195 | 6.28  | 5.71  | 5.64  | 4.94  | 6.1   | 5.89  |
| Lu | 0.676 | 0.537 | 0.516 | 0.685 | 0.535 | 0.729 | 0.533 | 0.729 | 0.98  | 0.91  | 0.88  | 0.77  | 0.93  | 0.95  |
| Hf | 6.519 | 8.128 | 6.503 | 5.707 | 10.26 | 7.476 | 8.994 | 7.729 | 7.96  | 7.24  | 8     | 6.48  | 8.01  | 8.04  |
| Ta | 3.652 | 3.47  | 4.48  | 5.315 | 4.182 | 4.149 | 3.81  | 4.245 | 5.68  | 5.77  | 5.61  | 5.88  | 6.11  | 5.98  |
| Pb | 13.07 | 24.79 | 25.73 | 18.67 | 12.23 | 16.19 | 22.24 | 17.97 | 13.53 | 20.8  | 28.19 | 27.81 | 40.72 | 20.53 |
| Th | 26.34 | 39.54 | 41.59 | 19.98 | 14.37 | 27    | 46.27 | 27.89 | 50.28 | 47.41 | 52.93 | 50.74 | 51.25 | 54.4  |
| U  | 3.659 | 4.501 | 6.239 | 4.408 | 1.534 | 3.304 | 4.999 | 3.182 | 5.46  | 4.9   | 8.18  | 7.1   | 6.34  | 6.16  |

|                                | Kezile pluton |        |        |        |        |        |        |        |        |        |        |        |        |
|--------------------------------|---------------|--------|--------|--------|--------|--------|--------|--------|--------|--------|--------|--------|--------|
| sample                         | 09KZ01        | 09KZ02 | 09KZ03 | 09KZ04 | 09KZ05 | 09KZ06 | 09KZ07 | 09KZ08 | 09KZ09 | 09KZ10 | 09KZ11 | 09KZ12 | 09KZ13 |
| Major elements (%)             |               |        |        |        |        |        |        |        |        |        |        |        |        |
| SiO <sub>2</sub>               | 74.82         | 72.69  | 76.34  | 71.6   | 70.14  | 74.77  | 74.27  | 73.44  | 76.45  | 73     | 73.57  | 73.03  | 75.95  |
| Al <sub>2</sub> O <sub>3</sub> | 12.55         | 13.8   | 12.13  | 13.55  | 13.91  | 12.63  | 12.91  | 13.12  | 12.03  | 13.18  | 13.29  | 13.5   | 12.22  |
| CaO                            | 0.82          | 1.1    | 0.63   | 1.41   | 1.55   | 0.72   | 0.78   | 0.64   | 0.64   | 0.91   | 1      | 0.93   | 0.65   |
| Fe <sub>2</sub> O <sub>3</sub> | 1.91          | 2.31   | 1.43   | 3.05   | 2.99   | 1.87   | 1.87   | 1.92   | 1.38   | 2.14   | 1.54   | 1.95   | 1.03   |
| K <sub>2</sub> O               | 5.26          | 5.22   | 5.08   | 5.13   | 5.11   | 5.36   | 5.5    | 5.79   | 5.13   | 5.51   | 5.49   | 5.64   | 5.55   |
| MgO                            | 0.24          | 0.35   | 0.17   | 0.49   | 0.58   | 0.26   | 0.28   | 0.27   | 0.17   | 0.34   | 0.29   | 0.31   | 0.2    |
| MnO                            | 0.03          | 0.03   | 0.02   | 0.06   | 0.05   | 0.02   | 0.02   | 0.01   | 0.01   | 0.03   | 0.02   | 0.03   | 0.02   |
| Na <sub>2</sub> O              | 3.51          | 3.64   | 3.33   | 3.54   | 3.77   | 3.41   | 3.4    | 3.61   | 3.32   | 3.6    | 3.65   | 3.59   | 3.41   |
| P <sub>2</sub> O <sub>5</sub>  | 0.03          | 0.05   | 0.02   | 0.08   | 0.08   | 0.03   | 0.03   | 0.04   | 0.02   | 0.04   | 0.04   | 0.04   | 0.01   |
| TiO <sub>2</sub>               | 0.22          | 0.28   | 0.15   | 0.36   | 0.38   | 0.21   | 0.22   | 0.23   | 0.14   | 0.24   | 0.26   | 0.25   | 0.13   |
| LOI                            | 0.49          | 0.39   | 0.54   | 0.6    | 1.23   | 0.54   | 0.57   | 0.8    | 0.55   | 0.77   | 0.67   | 0.52   | 0.68   |

|                      |       |       |       |       |       |       |       |       |       |       |       |       |       |
|----------------------|-------|-------|-------|-------|-------|-------|-------|-------|-------|-------|-------|-------|-------|
| Total                | 99.88 | 99.86 | 99.84 | 99.87 | 99.79 | 99.82 | 99.85 | 99.87 | 99.84 | 99.76 | 99.82 | 99.79 | 99.85 |
| Trace elements (ppm) |       |       |       |       |       |       |       |       |       |       |       |       |       |
| Sc                   | 1.4   | 1.25  | 0.82  | 3.49  | 3.48  | 1.18  | 0.89  | 1.61  | 0.06  | 1.67  | 1.51  | 2.05  | 0.77  |
| V                    | 6.16  | 11.92 | 7.45  | 17.23 | 20.76 | 4.5   | 6.36  | 7.18  | 2.33  | 5.46  | 7.9   | 10.46 | 4.87  |
| Cr                   | 2.26  | 1.51  | 5.69  | 3.25  | 5.32  | 0.26  | 1.84  | 2.67  | 1.04  | 3     | 2.04  | 1.25  | 2.05  |
| Co                   | 1.69  | 2.46  | 1.65  | 3.96  | 3.38  | 1.57  | 1.54  | 0.54  | 0.78  | 1.33  | 0.64  | 1.89  | 0.58  |
| Ni                   | 4.37  | 1.43  | 3.4   | 2.56  | 3.2   | 0.2   | 1.23  | 1.35  | 0.32  | 0.09  | 0.35  | 0.57  | 0.54  |
| Cu                   | 2.72  | 2.79  | 2.53  | 5.38  | 3.65  | 2     | 2.89  | 3.02  | 1.14  | 2.85  | 4.38  | 2.01  | 2.42  |
| Zn                   | 36.4  | 42.68 | 36.32 | 77.94 | 58.46 | 33.75 | 39.79 | 21.76 | 26.26 | 92.7  | 37.65 | 44.88 | 35.92 |
| Ga                   | 19.9  | 21.04 | 19.75 | 22.1  | 21.16 | 20.62 | 20.66 | 19.98 | 19.32 | 22.26 | 20.72 | 19.65 | 18.56 |
| Ge                   | 1.84  | 1.96  | 1.94  | 1.87  | 1.66  | 2.04  | 1.89  | 1.82  | 1.93  | 1.96  | 1.91  | 1.75  | 1.88  |
| Rb                   | 308.9 | 283   | 347.7 | 256.2 | 279.5 | 303.7 | 319.3 | 287.4 | 299.9 | 295.6 | 256.6 | 280.4 | 303.8 |
| Sr                   | 43.94 | 97.75 | 24.3  | 101   | 99.24 | 36.93 | 54.84 | 62.22 | 32    | 54.59 | 55.02 | 87.09 | 34.16 |
| Y                    | 35.55 | 36.15 | 33.7  | 34.25 | 29.92 | 29.83 | 33.9  | 31.49 | 32.22 | 33.35 | 34.42 | 30.21 | 31.75 |
| Zr                   | 298   | 275.7 | 193.5 | 289.6 | 314.6 | 254.8 | 254.6 | 310.8 | 206.3 | 291.5 | 297.7 | 302.8 | 136.9 |
| Nb                   | 46.13 | 37.31 | 39.89 | 30.3  | 31.78 | 43.79 | 41.1  | 42.49 | 46.43 | 45.82 | 41.02 | 37.46 | 37.12 |
| Cs                   | 15.68 | 9.4   | 13.14 | 19.48 | 15.67 | 9.23  | 9.77  | 3.12  | 7.98  | 5.26  | 4.81  | 7.74  | 5.3   |
| Ba                   | 170.6 | 340.4 | 80.82 | 404.3 | 421.8 | 164.5 | 243.7 | 338.2 | 87.15 | 367.1 | 348.3 | 358   | 121.4 |
| La                   | 66.81 | 63.3  | 82.47 | 62.43 | 60.94 | 100   | 62.88 | 57.98 | 55.58 | 71.27 | 69.89 | 52.24 | 48.63 |
| Ce                   | 117.9 | 109.7 | 136.1 | 112.3 | 107.1 | 166.3 | 109   | 99.09 | 98.16 | 124   | 121.1 | 93.42 | 85.26 |
| Pr                   | 12.54 | 11.88 | 13.97 | 12.74 | 11.9  | 17.16 | 11.49 | 10.61 | 9.96  | 12.94 | 13.27 | 10.24 | 9.06  |
| Nd                   | 39.56 | 38.95 | 39.8  | 41.86 | 38.08 | 50.58 | 35.73 | 33.72 | 30.82 | 40.76 | 42.34 | 32.47 | 29.03 |
| Sm                   | 6.68  | 6.69  | 6     | 7.43  | 6.44  | 6.58  | 6.07  | 5.86  | 5.16  | 6.79  | 6.95  | 5.75  | 5.46  |
| Eu                   | 0.35  | 0.54  | 0.23  | 0.87  | 0.75  | 0.36  | 0.41  | 0.38  | 0.18  | 0.5   | 0.53  | 0.53  | 0.26  |
| Gd                   | 5.7   | 6.22  | 5.04  | 6.89  | 5.68  | 4.98  | 5.57  | 5.27  | 4.68  | 6.02  | 5.94  | 5.01  | 5.14  |
| Tb                   | 1.02  | 1.02  | 0.89  | 1.09  | 0.95  | 0.81  | 0.95  | 0.91  | 0.85  | 1.01  | 1     | 0.88  | 0.93  |
| Dy                   | 6.16  | 6.39  | 5.56  | 6.52  | 5.36  | 4.83  | 5.7   | 5.61  | 5.67  | 6.17  | 5.93  | 5.27  | 5.44  |
| Ho                   | 1.39  | 1.39  | 1.25  | 1.38  | 1.2   | 1.07  | 1.24  | 1.27  | 1.22  | 1.32  | 1.29  | 1.16  | 1.17  |
| Er                   | 4.04  | 4.03  | 3.86  | 3.98  | 3.42  | 3.19  | 3.82  | 3.85  | 3.73  | 3.99  | 3.83  | 3.34  | 3.42  |



|    |       |       |       |       |       |       |       |       |       |       |       |       |       |
|----|-------|-------|-------|-------|-------|-------|-------|-------|-------|-------|-------|-------|-------|
| Tm | 0.68  | 0.66  | 0.65  | 0.61  | 0.55  | 0.52  | 0.63  | 0.64  | 0.67  | 0.63  | 0.61  | 0.54  | 0.55  |
| Yb | 4.48  | 4.39  | 4.44  | 4.04  | 3.35  | 3.71  | 4.3   | 4.21  | 4.78  | 4.31  | 3.99  | 3.59  | 3.8   |
| Lu | 0.7   | 0.65  | 0.71  | 0.63  | 0.55  | 0.58  | 0.67  | 0.67  | 0.73  | 0.69  | 0.63  | 0.57  | 0.58  |
| Hf | 8.92  | 8.18  | 7.33  | 8.44  | 8.52  | 8.11  | 7.75  | 8.79  | 7.38  | 8.8   | 8.83  | 9.32  | 5.27  |
| Ta | 5.11  | 4.16  | 5.09  | 3.17  | 2.95  | 4.57  | 4.95  | 4.26  | 6.49  | 4.93  | 4.5   | 3.62  | 6.45  |
| Pb | 25.75 | 22.4  | 25.69 | 49.33 | 24.05 | 18.52 | 20.11 | 6.08  | 20.83 | 16.75 | 30.04 | 22.86 | 22.49 |
| Th | 54.17 | 41.59 | 61.22 | 38.63 | 35.38 | 54.44 | 49.99 | 44.83 | 56.91 | 43.33 | 36.22 | 46.55 | 43.93 |
| U  | 7.06  | 6.45  | 12.69 | 5.4   | 4.73  | 9.54  | 10.26 | 7.34  | 10.63 | 8.81  | 7.24  | 8.28  | 7.14  |

|                                | Halajun pluton III |                  |                  |                  |                  | Halajun pluton IV |                 |                 |                 |
|--------------------------------|--------------------|------------------|------------------|------------------|------------------|-------------------|-----------------|-----------------|-----------------|
| sample                         | 2010HLJII<br>I-1   | 2010HLJII<br>I-2 | 2010HLJII<br>I-3 | 2010HLJII<br>I-4 | 2010HLJII<br>I-5 | 2010HLJI<br>V-1   | 2010HLJI<br>V-3 | 2010HLJI<br>V-3 | 2010HLJI<br>V-4 |
| Major elements (%)             |                    |                  |                  |                  |                  |                   |                 |                 |                 |
| SiO <sub>2</sub>               | 62.25              | 62.69            | 60.29            | 61.22            | 62.37            | 73.8              | 73.75           | 73.76           | 73.66           |
| Al <sub>2</sub> O <sub>3</sub> | 15.71              | 15.67            | 15.37            | 17.68            | 15.82            | 12.7              | 12.75           | 12.77           | 12.7            |
| CaO                            | 2.41               | 1.63             | 2.6              | 1.34             | 2.35             | 0.87              | 0.85            | 0.94            | 0.52            |
| Fe <sub>2</sub> O <sub>3</sub> | 5.72               | 5.95             | 7.52             | 3.68             | 5.35             | 1.85              | 1.91            | 1.59            | 2.52            |
| K <sub>2</sub> O               | 5.28               | 6.94             | 6.18             | 9.45             | 7.07             | 5.41              | 5.39            | 5.33            | 5.48            |
| MgO                            | 1.01               | 0.84             | 1.2              | 0.53             | 0.92             | 0.24              | 0.24            | 0.28            | 0.35            |
| MnO                            | 0.12               | 0.07             | 0.14             | 0.03             | 0.09             | 0.09              | 0.02            | 0.01            | 0.01            |
| Na <sub>2</sub> O              | 4.71               | 3.68             | 3.75             | 3.78             | 3.6              | 3.29              | 3.34            | 3.15            | 3.08            |
| P <sub>2</sub> O <sub>5</sub>  | 0.1                | 0.11             | 0.13             | 0.029            | 0.11             | 0.028             | 0.031           | 0.031           | 0.032           |
| TiO <sub>2</sub>               | 0.44               | 0.45             | 0.68             | 0.08             | 0.46             | 0.19              | 0.19            | 0.2             | 0.2             |
| LOI                            | 2.07               | 1.79             | 1.91             | 2                | 1.68             | 1.4               | 1.35            | 1.72            | 1.24            |
| Total                          | 99.82              | 99.82            | 99.77            | 99.82            | 99.82            | 99.87             | 99.82           | 99.78           | 99.79           |
| Trace elements (ppm)           |                    |                  |                  |                  |                  |                   |                 |                 |                 |
| Sc                             | 3.1                | 4.58             | 4.8              | 2.8              | 4.32             | 1.077             | 0.887           | 1.341           | 0.53            |
| V                              | 31.81              | 2751.6           | 4045.6           | 539.5            | 2776.1           | 8.507             | 7.702           | 7.664           | 6.751           |
| Cr                             | 14.12              | 33.85            | 45.56            | 26.15            | 33.13            | 0.147             | 2.275           | 6.278           | 0.546           |

|    |       |       |        |       |       |       |       |       |       |
|----|-------|-------|--------|-------|-------|-------|-------|-------|-------|
| Co | 3.16  | 16.24 | 19.58  | 7.24  | 18.82 | 3.28  | 1.114 | 1.601 | 1.848 |
| Ni | 9.32  | 571.2 | 1135.3 | 265.8 | 704.8 | 0.103 | 1.138 | 3.903 | 0.822 |
| Cu | 5.12  | 19.15 | 4.92   | 5     | 4.9   | 3.18  | 12.13 | 3.805 | 5.569 |
| Zn | 81.89 | 11.24 | 6.2    | 9.27  | 5.37  | 28.53 | 31.15 | 31.9  | 40.18 |
| Ga | 31.16 | 28.84 | 9.79   | 34.79 | 5.9   | 22.82 | 21.54 | 23.73 | 22.16 |
| Ge | 2.3   | 979.9 | 108.7  | 104.9 | 89.67 | 1.895 | 1.774 | 2.077 | 2.068 |
| Rb | 258.4 | 29.48 | 33.18  | 25.85 | 29.96 | 384.6 | 365.6 | 369.7 | 369.8 |
| Sr | 118.2 | 2.42  | 2.68   | 1.23  | 2.31  | 62.74 | 42.69 | 44.8  | 45.38 |
| Y  | 48.94 | 305.6 | 305.3  | 411.8 | 329.1 | 38.22 | 30.28 | 42.66 | 40.02 |
| Zr | 640.4 | 130.2 | 124.4  | 145.4 | 146.2 | 240.7 | 217.3 | 256.6 | 245.5 |
| Nb | 92.15 | 45.25 | 52.49  | 43.63 | 47.02 | 42.86 | 40.03 | 51.63 | 44.65 |
| Cs | 5.35  | 629.3 | 610.9  | 840.5 | 651.1 | 9.725 | 5.256 | 5.712 | 6.49  |
| Ba | 469.6 | 87.37 | 114.4  | 40.77 | 84.97 | 348.5 | 315   | 311.8 | 334.6 |
| La | 129.7 | 3.31  | 6.14   | 3.85  | 5.78  | 20.95 | 26.1  | 34.25 | 31.05 |
| Ce | 230.7 | 513   | 471.2  | 623.1 | 531.2 | 38.99 | 44.56 | 62.71 | 55.66 |
| Pr | 25.13 | 125.9 | 118.4  | 101.4 | 106.3 | 4.322 | 4.823 | 6.916 | 5.999 |
| Nd | 84.86 | 225   | 215.5  | 177   | 195.5 | 15.98 | 15.86 | 23.93 | 21.24 |
| Sm | 13.9  | 23.67 | 24.41  | 19.54 | 21.97 | 3.848 | 3.09  | 5.11  | 4.693 |
| Eu | 1.05  | 77.06 | 83.98  | 64.32 | 75.73 | 0.416 | 0.339 | 0.431 | 0.47  |
| Gd | 12.26 | 12.79 | 14.36  | 10.81 | 13.84 | 4.349 | 3.175 | 5.236 | 5.115 |
| Tb | 1.88  | 0.98  | 1.23   | 0.66  | 1.07  | 0.877 | 0.605 | 0.969 | 0.952 |
| Dy | 10.72 | 11.21 | 13.08  | 9.95  | 12.31 | 6.084 | 4.514 | 6.748 | 6.48  |
| Ho | 2.13  | 1.8   | 2.06   | 1.63  | 1.89  | 1.377 | 1.101 | 1.515 | 1.525 |
| Er | 5.76  | 9.72  | 11.28  | 9.41  | 10.5  | 4.58  | 3.683 | 4.868 | 4.582 |
| Tm | 0.83  | 1.97  | 2.29   | 1.92  | 2.16  | 0.757 | 0.657 | 0.878 | 0.79  |
| Yb | 5.15  | 5.26  | 5.99   | 5.29  | 5.77  | 5.283 | 4.485 | 5.945 | 5.346 |
| Lu | 0.81  | 0.73  | 0.87   | 0.76  | 0.79  | 0.833 | 0.7   | 0.924 | 0.848 |
| Hf | 13.6  | 4.81  | 5.32   | 4.78  | 4.93  | 7.504 | 7.241 | 8.753 | 7.938 |
| Ta | 6.53  | 0.76  | 0.82   | 0.78  | 0.79  | 5.586 | 4.844 | 7.46  | 5.882 |
| Pb | 19.36 | 12.61 | 12.11  | 18.31 | 13.43 | 13.06 | 12.1  | 11.58 | 18.78 |

|    |       |       |       |       |       |       |       |       |       |
|----|-------|-------|-------|-------|-------|-------|-------|-------|-------|
| Th | 28.66 | 5.78  | 6.96  | 4.99  | 6.04  | 49.03 | 31.79 | 47.24 | 47.83 |
| U  | 5.67  | 328.4 | 29.97 | 119.7 | 26.42 | 4.835 | 5.119 | 4.761 | 4.979 |

|                                | Halajun pluton V |          |          |          |          |          |          |          |          |
|--------------------------------|------------------|----------|----------|----------|----------|----------|----------|----------|----------|
| sample                         | 09HLJV-1         | 09HLJV-2 | 09HLJV-3 | 09HLJV-4 | 09HLJV-5 | 09HLJV-6 | 09HLJV-7 | 09HLJV-8 | 09HLJV-9 |
| Major elements (%)             |                  |          |          |          |          |          |          |          |          |
| SiO <sub>2</sub>               | 76.38            | 75.72    | 76.56    | 76.25    | 76.08    | 76.31    | 75.47    | 75.96    | 76.09    |
| Al <sub>2</sub> O <sub>3</sub> | 12.35            | 12.3     | 12.1     | 12.12    | 12.23    | 12.16    | 12.28    | 12.24    | 12.11    |
| CaO                            | 0.76             | 0.66     | 0.6      | 0.64     | 0.67     | 0.77     | 0.67     | 0.65     | 0.66     |
| Fe <sub>2</sub> O <sub>3</sub> | 0.63             | 1.75     | 1.27     | 1.41     | 1.38     | 1.15     | 1.54     | 1.42     | 1.38     |
| K <sub>2</sub> O               | 5.17             | 4.65     | 4.59     | 4.8      | 4.8      | 4.85     | 4.89     | 4.91     | 4.98     |
| MgO                            | 0.1              | 0.06     | 0.05     | 0.05     | 0.06     | 0.05     | 0.05     | 0.05     | 0.05     |
| MnO                            | 0.01             | 0.02     | 0.02     | 0.02     | 0.01     | 0.01     | 0.02     | 0.02     | 0.02     |
| Na <sub>2</sub> O              | 3.05             | 3.53     | 3.5      | 3.42     | 3.43     | 3.28     | 3.42     | 3.4      | 3.28     |
| P <sub>2</sub> O <sub>5</sub>  | 0.02             | 0.02     | 0.01     | 0.02     | 0.02     | 0.02     | 0.02     | 0.02     | 0.02     |
| TiO <sub>2</sub>               | 0.08             | 0.09     | 0.07     | 0.08     | 0.08     | 0.08     | 0.07     | 0.07     | 0.07     |
| LOI                            | 0.87             | 0.64     | 0.63     | 0.58     | 0.64     | 0.72     | 0.97     | 0.66     | 0.74     |
| Total                          | 99.4             | 99.42    | 99.43    | 99.39    | 99.39    | 99.4     | 99.4     | 99.4     | 99.39    |
| Trace elements (ppm)           |                  |          |          |          |          |          |          |          |          |
| Sc                             | 1.272            | 1.786    | 1.106    | 1.199    | 1.328    | 1.614    | 1.074    | 1.356    | 1.426    |
| V                              | 4.492            | 3.598    | 3.06     | 2.876    | 2.775    | 2.588    | 2.424    | 4.655    | 3.428    |
| Cr                             | 0.706            | 2.218    | 1.49     | 2.081    | 1.683    | 1.805    | 1.42     | 2.195    | 2.667    |
| Co                             | 27.7             | 27.87    | 33.67    | 33.54    | 30.42    | 30.88    | 39.79    | 39.93    | 38.31    |
| Ni                             | 1.344            | 1.388    | 1.72     | 1.615    | 1.589    | 1.715    | 1.978    | 1.876    | 1.811    |
| Cu                             | 1.568            | 0.815    | 0.878    | 0.585    | 0.741    | 1.027    | 1.179    | 0.575    | 0.755    |
| Zn                             | 25.59            | 28.4     | 21.98    | 26.1     | 26.81    | 28.81    | 26.78    | 21.73    | 24.94    |
| Ga                             | 34.26            | 35.45    | 33.9     | 34.91    | 36.88    | 37.23    | 34.55    | 37.74    | 37.38    |
| Ge                             | 2.682            | 3.117    | 2.866    | 2.885    | 3.181    | 2.964    | 2.835    | 3.581    | 3.453    |

|    |       |       |       |       |       |       |       |       |       |
|----|-------|-------|-------|-------|-------|-------|-------|-------|-------|
| Rb | 443.9 | 465.3 | 413.4 | 469.2 | 494.7 | 497.4 | 445.5 | 584   | 570.8 |
| Sr | 15.64 | 8.868 | 11.41 | 6.304 | 9.215 | 8.695 | 9.659 | 4.898 | 6.731 |
| Y  | 112.9 | 134.2 | 108.7 | 124.3 | 129   | 135.2 | 118.1 | 155.3 | 119.4 |
| Zr | 233.6 | 236.6 | 221.2 | 215.9 | 207.5 | 239.6 | 198.9 | 213.6 | 206.1 |
| Nb | 148.4 | 152.3 | 177.6 | 153.1 | 173.6 | 183.7 | 167.8 | 205.9 | 183.1 |
| Cs | 7.628 | 13.44 | 7.079 | 18.26 | 19.36 | 7.797 | 7.845 | 18.76 | 23.61 |
| Ba | 38.11 | 16.07 | 27.53 | 16.48 | 31.09 | 10.98 | 23.21 | 8.375 | 11.76 |
| La | 97.55 | 141.9 | 159.8 | 123.4 | 112.9 | 139.5 | 133.6 | 105.5 | 141   |
| Ce | 186.1 | 272.9 | 307.8 | 253.3 | 226.8 | 258.3 | 245.3 | 217.1 | 254.1 |
| Pr | 19.25 | 28.07 | 30.51 | 25.26 | 25.18 | 25.15 | 24.37 | 24.72 | 24.49 |
| Nd | 62.88 | 92.9  | 101.6 | 81.02 | 81.32 | 80.95 | 79.05 | 80.08 | 76.8  |
| Sm | 12.14 | 18.64 | 20.22 | 15.36 | 16.02 | 15.95 | 15.41 | 15.99 | 14.57 |
| Eu | 0.166 | 0.147 | 0.192 | 0.162 | 0.171 | 0.123 | 0.163 | 0.108 | 0.123 |
| Gd | 12.41 | 18.68 | 17.77 | 15.13 | 15.99 | 15.8  | 15.14 | 16.2  | 15.21 |
| Tb | 2.579 | 3.676 | 3.301 | 3.064 | 3.101 | 3.137 | 3.053 | 3.337 | 3.036 |
| Dy | 17.84 | 23.23 | 20.14 | 19.92 | 20.55 | 20.7  | 19.73 | 22    | 19.52 |
| Ho | 3.918 | 4.848 | 3.987 | 4.289 | 4.412 | 4.381 | 4.107 | 4.78  | 4.073 |
| Er | 12.07 | 14.2  | 11.3  | 13.07 | 13.37 | 13.31 | 12.37 | 14.91 | 12.18 |
| Tm | 1.986 | 2.164 | 1.767 | 2.019 | 2.101 | 2.167 | 1.901 | 2.452 | 2.001 |
| Yb | 13.65 | 14.46 | 11.7  | 13.79 | 13.88 | 15.25 | 12.74 | 16.88 | 13.39 |
| Lu | 1.983 | 2.073 | 1.701 | 1.985 | 1.974 | 2.198 | 1.817 | 2.458 | 1.986 |
| Hf | 11.52 | 11.71 | 10.79 | 10.93 | 10.17 | 12.65 | 9.654 | 11.86 | 11.24 |
| Ta | 10.83 | 11.09 | 14.17 | 17.27 | 16.96 | 19.45 | 17.85 | 22.27 | 15.38 |
| Pb | 14.69 | 9.552 | 16.82 | 14.6  | 15.07 | 18.59 | 15.29 | 11.47 | 11.89 |
| Th | 47.11 | 50.92 | 44.87 | 51.28 | 54.72 | 50.55 | 47.69 | 61.35 | 49.77 |
| U  | 15.85 | 5.329 | 15.59 | 7.135 | 7.215 | 7.656 | 11.61 | 7.522 | 4.594 |

Zhang & Zou. (2013)

|        | Kezi'ertuo pluton |         |          |          |          |          |         |         |         |        |        |        |        |
|--------|-------------------|---------|----------|----------|----------|----------|---------|---------|---------|--------|--------|--------|--------|
| sample | TM-YT-7           | TM-YT-8 | TM-YT-10 | TM-YT-11 | TM-YT-14 | TM-YT-16 | YT-HH-1 | YT-HH-2 | YT-HH-4 | YT-HH- | YT-HH- | YT-HH- | YT-HH- |

|                      |       |       |       |       |       |       |       |       |       | 5     | 6     | 7     | 8     |
|----------------------|-------|-------|-------|-------|-------|-------|-------|-------|-------|-------|-------|-------|-------|
| Major elements (%)   |       |       |       |       |       |       |       |       |       |       |       |       |       |
| SiO2                 | 77.32 | 76.46 | 75.71 | 74.64 | 75.26 | 75.48 | 72.19 | 71.01 | 74.22 | 74.98 | 72.75 | 72.96 | 67.67 |
| TiO2                 | 0.06  | 0.07  | 0.08  | 0.09  | 0.09  | 0.08  | 0.24  | 0.24  | 0.18  | 0.18  | 0.03  | 0.25  | 0.43  |
| Al2O3                | 11.67 | 12.06 | 12.57 | 11.81 | 11.76 | 12.34 | 13.5  | 14.12 | 12.88 | 12.73 | 13.52 | 13.15 | 13.93 |
| Fe2O3T               | 0.32  | 0.57  | 0.46  | 0.44  | 2.02  | 0.76  | 2.52  | 2.56  | 1.85  | 1.94  | 2.08  | 2.62  | 4.2   |
| MnO                  | 0     | 0     | 0     | 0     | 0     | 0     | 0     | 0     | 0     | 0.03  | 0.04  | 0.04  | 0.08  |
| MgO                  | 0.04  | 0.06  | 0.06  | 0.05  | 0.02  | 0.03  | 0.16  | 0.15  | 0.11  | 0.12  | 0.13  | 0.18  | 0.35  |
| CaO                  | 0.1   | 0.94  | 1.08  | 2.6   | 0.64  | 1.22  | 1.06  | 1.15  | 0.97  | 0.97  | 1     | 1.08  | 1.38  |
| Na2O                 | 2.59  | 3.26  | 3.19  | 2.34  | 3.35  | 2.93  | 3.68  | 3.86  | 3.5   | 3.29  | 3.61  | 3.5   | 3.55  |
| K2O                  | 6.37  | 5     | 5.47  | 5.74  | 5.26  | 5.92  | 5.96  | 5.96  | 5.74  | 5.36  | 5.89  | 5.63  | 6.99  |
| P2O5                 | 0.001 | 0.001 | 0.001 | 0.001 | 0.001 | 0.001 | 0.001 | 0.001 | 0.001 | 0.029 | 0.031 | 0.001 | 0.083 |
| LOI                  | 0.79  | 1.18  | 0.99  | 1.69  | 0.67  | 1.16  | 0.37  | 0.36  | 0.31  | 0.34  | 0.43  | 0.46  | 0.39  |
| Total                | 99.26 | 99.61 | 99.62 | 99.41 | 99.08 | 99.93 | 99.67 | 99.41 | 99.76 | 99.98 | 99.51 | 99.87 | 99.04 |
| A/CNK                | 1.03  | 0.97  | 0.96  | 0.8   | 0.95  | 0.92  | 0.94  | 0.95  | 0.94  | 0.98  | 0.96  | 0.95  | 0.88  |
| K2O + Na2O           | 8.96  | 8.26  | 8.66  | 8.08  | 8.61  | 8.85  | 9.63  | 9.81  | 9.24  | 8.65  | 9.5   | 9.13  | 10.54 |
| AR                   | 7.36  | 4.49  | 4.47  | 3.55  | 5.55  | 4.76  | 4.9   | 4.6   | 5     | 4.43  | 4.78  | 4.58  | 5.42  |
| Trace elements (ppm) |       |       |       |       |       |       |       |       |       |       |       |       |       |
| Sc                   | 0.12  | 0.74  | 0.75  | 1.22  | 0.36  | 0.45  | 0.68  | 0.52  | 0.56  | 0.34  | 0.49  | 0.7   | 2.14  |
| Ga                   | 29.27 | 34.4  | 34.12 | 38.29 | 33.23 | 32.62 | 26.94 | 28.01 | 25.77 | 25.42 | 26.47 | 26.28 | 27.11 |
| Rb                   | 314.3 | 374.5 | 345.6 | 362.5 | 418.2 | 325.4 | 157.2 | 154.9 | 145.8 | 147.6 | 156.2 | 150   | 162.1 |
| Ba                   | 109.9 | 38.78 | 89.66 | 134.4 | 16.96 | 104.5 | 517.5 | 487.3 | 441.3 | 443.6 | 605.7 | 499.2 | 541.8 |
| Th                   | 4.46  | 50.61 | 43.19 | 51.78 | 37.42 | 57.08 | 1.76  | 2.2   | 3.35  | 14.92 | 2.91  | 8.81  | 8.5   |
| U                    | 10.79 | 7.13  | 6.99  | 9.97  | 5.49  | 13.1  | 2.36  | 2.12  | 2.16  | 2.31  | 3.43  | 1.84  | 3.35  |
| Nb                   | 62.22 | 122.9 | 87.48 | 135.9 | 101.4 | 127.9 | 40.26 | 37.28 | 32.79 | 29.2  | 34.35 | 43.02 | 53.01 |
| Ta                   | 3.71  | 3.03  | 3.52  | 6.72  | 2.33  | 3.82  | 1.71  | 0.82  | 1.72  | 0.94  | 0.89  | 1.89  | 3.14  |
| La                   | 3.22  | 113.3 | 95.69 | 118.1 | 64.47 | 31.44 | 8.12  | 4.43  | 4.1   | 37.2  | 4.86  | 35.77 | 23.2  |
| Ce                   | 15.96 | 236.7 | 180.9 | 235.6 | 171.4 | 78.46 | 28.76 | 47.76 | 50.19 | 138.8 | 38.95 | 111.8 | 84.86 |

|    |        |        |        |        |        |        |        |        |        |        |        |        |        |
|----|--------|--------|--------|--------|--------|--------|--------|--------|--------|--------|--------|--------|--------|
| Pr | 0.56   | 23.03  | 18.79  | 29.74  | 13.13  | 7.81   | 2.29   | 1.2    | 1.01   | 8.13   | 1.77   | 7.75   | 5.55   |
| Sr | 22.8   | 13.63  | 23.72  | 28.74  | 19.31  | 28.83  | 53.37  | 36.9   | 46.42  | 83.91  | 83.1   | 82.43  | 74.87  |
| Nd | 1.76   | 76.52  | 64.7   | 116.8  | 42.45  | 31.62  | 9.74   | 5.14   | 4.95   | 30.37  | 8.56   | 30.81  | 22.4   |
| Zr | 202.7  | 255.9  | 245.1  | 243.4  | 183.9  | 315.5  | 338.3  | 348.7  | 256.1  | 285.2  | 271.1  | 355.3  | 541.2  |
| Hf | 12.17  | 13.49  | 12.31  | 12.17  | 9.84   | 15.39  | 10.13  | 10.26  | 7.77   | 8.67   | 8.29   | 10.47  | 14.97  |
| Sm | 0.32   | 13.23  | 11.77  | 24.23  | 7.41   | 8.15   | 2.17   | 1.22   | 0.95   | 5.32   | 2.38   | 6.04   | 4.96   |
| Eu | 0.03   | 0.12   | 0.14   | 0.23   | 0.08   | 0.2    | 0.49   | 0.3    | 0.28   | 0.85   | 0.66   | 1      | 0.89   |
| Gd | 0.39   | 13.43  | 11.49  | 26.53  | 7.81   | 9.76   | 2.37   | 1.59   | 1.3    | 5.71   | 2.96   | 6.65   | 5.79   |
| Tb | 0.08   | 2.23   | 1.8    | 4.81   | 1.26   | 1.96   | 0.4    | 0.27   | 0.21   | 0.81   | 0.53   | 1.03   | 0.99   |
| Dy | 0.64   | 13.86  | 11.52  | 30.41  | 7.54   | 13.22  | 2.36   | 1.68   | 1.36   | 4.54   | 3.32   | 5.98   | 6.06   |
| Y  | 3.93   | 75.63  | 67.96  | 200.8  | 40.45  | 69.61  | 11.04  | 9      | 6.93   | 22.6   | 15.1   | 31.09  | 33.97  |
| Ho | 0.16   | 2.95   | 2.59   | 6.43   | 1.54   | 2.86   | 0.48   | 0.35   | 0.28   | 0.9    | 0.67   | 1.2    | 1.26   |
| Er | 0.56   | 9.23   | 8.54   | 19.65  | 4.52   | 8.79   | 1.37   | 1.05   | 0.86   | 2.5    | 1.9    | 3.43   | 3.67   |
| Tm | 0.11   | 1.66   | 1.59   | 3.52   | 0.75   | 1.49   | 0.22   | 0.17   | 0.14   | 0.4    | 0.31   | 0.54   | 0.61   |
| Yb | 0.82   | 11.07  | 10.79  | 23.75  | 4.78   | 9.41   | 1.46   | 1.15   | 0.95   | 2.49   | 1.94   | 3.49   | 4.11   |
| Lu | 0.12   | 1.59   | 1.55   | 3.41   | 0.67   | 1.29   | 0.22   | 0.17   | 0.14   | 0.37   | 0.28   | 0.53   | 0.63   |
| Ti | 349.55 | 445.35 | 490.35 | 559.43 | 560.19 | 496.45 | 1433.7 | 1418.4 | 1052.4 | 1098.1 | 201.32 | 1487.1 | 2559.3 |
| P  | 4.36   | 4.36   | 4.36   | 4.36   | 4.36   | 4.36   | 4.36   | 4.36   | 4.36   | 126.11 | 135.35 | 4.36   | 360.26 |

Huang *et al.*  
(2012)

## Reference

- Jiang, C.Y., Zhang, P.B., Lu, D.R. & Bai, K.Y. 2004b. Petrogenesis and magma source of the ultramafic rocks at Wajilitag region, western Tarim Plate in Xinjiang. *Acta Geologica Sinica*, 20, 1433–1444. (in Chinese with English abstract)
- Li, Y.Q., Li, Z.L., Sun, Y.L., Chen, H.L., Yang, S.F. & Yu, X. 2010. PGE and geochemistry of Wajilitag ultramafic cryptoexplosive brecciated rocks from Tarim Basin: implications for petrogenesis. *Acta Petrologica Sinica*, 26, 3307–3318. (in Chinese with English abstract)

- Huang, H., Zhang, Z.C., Kusky, T., Santosh, M., Zhang, S., Zhang, D.Y., Liu, J.L. & Zhao, Z.D. 2012. Continental vertical growth in the transitional zone between South Tianshan and Tarim, western Xinjiang, NW China: Insight from the Permian Halajun A1-type granitic magmatism. *Lithos*, 155, 49–66.
- Sun, L.H., Wang, Y.J., Fan, W.M. & Zi, J.W. 2008. A further discussion of the petrogenesis and tectonic implication of the Mazhashan syenites in the Bachu area. *Journal of Jilin University (Earth Science Edition)*, 38(1), 8-20. (in Chinese with English abstract)
- Wei, X. & Xu, Y.G. 2011. Petrogenesis of Xiaohaizi syenite complex from Bachu area, Tarim. *Acta Petrologica Sinica*, 27(10), 2984- 3004. (in Chinese with English abstract)
- Yang, S.F., Chen, H.L., Dong, C.W., Jia, C.Z. & Wang, Z.G. 1996. The discovery of Permian syenite inside Tarim Basin and its geodynamic significance. *Geochimica*, 25(2), 121-128. (in Chinese with English abstract).
- Zhang, C.L., Li, X.H., Li, Z.X., Ye, H.M. & Li, C.N. 2008. A Permian layered intrusive complex in the Western Tarim Block, northwestern China: product of a Ca. 275–Ma mantle plume? *Journal of Geology*, 116 (3), 269–287.
- Zhang, C.L. & Zou, H.B. 2013. Permian A-type granites in Tarim and western part of Central Asian Orogenic Belt (CAOB): Genetically related to a common Permian mantle plume? *Lithos*, 172, 47-60.
